# Supplementary material for: Phosphine interacting with argon: potential energy surface and line widths of PH3 perturbed by Ar
Source: Royal Society of Chemistry journal article supplement (doi:10.1039/d3cp00534h), 2023-01-01
Supplement: d3cp00534h1.pdf [file d3cp00534h1.pdf]

## **Supplementary Material**

### **Phosphine interacting with argon: Potential energy surface and line widths of PH<sub>3</sub> perturbed by Ar**

**J. Salem, A. Badri, M. Salem, M. Mogren Al-Mogren, M. Hochlaf**

**Table S1:** The radial coefficients,  $V_{lm}(R)$ , as defined in equation 2.  $V_{lm}(R)$  coefficients are in  $\text{cm}^{-1}$  and R is in bohr.

| l | m | R      | V <sub>lm</sub>         |
|---|---|--------|-------------------------|
| 0 | 0 | 4.000  | 204226.8061400691221934 |
| 0 | 0 | 4.250  | 139542.6015718522248790 |
| 0 | 0 | 4.500  | 94911.5826682702754624  |
| 0 | 0 | 4.750  | 63951.1623252182398573  |
| 0 | 0 | 5.000  | 42517.5533050409430871  |
| 0 | 0 | 5.250  | 27797.5478407275295467  |
| 0 | 0 | 5.500  | 17807.2422010590416903  |
| 0 | 0 | 5.750  | 11122.3333387807706458  |
| 0 | 0 | 6.000  | 6720.0400599249142033   |
| 0 | 0 | 6.250  | 3872.6700551870458185   |
| 0 | 0 | 6.500  | 2069.1770601765388164   |
| 0 | 0 | 6.750  | 955.8931964422024521    |
| 0 | 0 | 7.000  | 291.6169164603278432    |
| 0 | 0 | 7.250  | -85.8143865795348546    |
| 0 | 0 | 7.500  | -283.8586533699855750   |
| 0 | 0 | 7.750  | -372.6685181943375369   |
| 0 | 0 | 8.000  | -397.3094329004502470   |
| 0 | 0 | 8.250  | -386.1957379013471154   |
| 0 | 0 | 8.500  | -356.8552269427608508   |
| 0 | 0 | 8.750  | -319.8013250711665592   |
| 0 | 0 | 9.000  | -281.0869461276070069   |
| 0 | 0 | 9.250  | -244.0085493074909380   |
| 0 | 0 | 9.500  | -210.1809084422540934   |
| 0 | 0 | 9.750  | -180.2132961840821395   |
| 0 | 0 | 10.000 | -154.1628972168836356   |
| 0 | 0 | 10.250 | -131.8045246516860232   |
| 0 | 0 | 10.500 | -112.7675161982308794   |
| 0 | 0 | 10.750 | -96.6276266228373828    |
| 0 | 0 | 11.000 | -82.9602756505372980    |
| 0 | 0 | 11.250 | -71.4216761309435526    |
| 0 | 0 | 11.500 | -61.7007066472268164    |
| 0 | 0 | 11.750 | -53.4819362157730325    |
| 0 | 0 | 12.000 | -46.5005380091472560    |
| 0 | 0 | 12.250 | -40.5398901362305821    |
| 0 | 0 | 12.500 | -35.4550982301879998    |
| 0 | 0 | 12.750 | -31.1180208918486052    |
| 0 | 0 | 13.000 | -27.4005109502116788    |
| 0 | 0 | 13.250 | -24.1859938745616248    |
| 0 | 0 | 13.500 | -21.4041672957143092    |
| 0 | 0 | 13.750 | -18.9962941225402524    |
| 0 | 0 | 14.000 | -16.9036364763432658    |
| 0 | 0 | 14.250 | -15.0724608207481676    |
| 0 | 0 | 14.500 | -13.4690493576209604    |
| 0 | 0 | 14.750 | -12.0646880831350618    |
| 0 | 0 | 15.000 | -10.8306632597914199    |
| 0 | 0 | 15.250 | -9.7404951326309721     |
| 0 | 0 | 15.500 | -8.7766386811984649     |
| 0 | 0 | 15.750 | -7.9237824297290382     |
| 0 | 0 | 16.000 | -7.1666151510127554     |
| 0 | 0 | 16.250 | -6.4910584507822033     |
| 0 | 0 | 16.500 | -5.8879638266520526     |
| 0 | 0 | 16.750 | -5.3494150573957011     |
| 0 | 0 | 17.000 | -4.8674958879991488     |
| 0 | 0 | 17.250 | -4.4348221475793324     |
| 0 | 0 | 17.500 | -4.0461377957914468     |
| 0 | 0 | 17.750 | -3.6967188323482429     |
| 0 | 0 | 18.000 | -3.3818413103637828     |
| 0 | 0 | 18.250 | -3.0971159874647771     |
| 0 | 0 | 18.500 | -2.8394923211398684     |
| 0 | 0 | 18.750 | -2.6062544512971648     |
| 0 | 0 | 19.000 | -2.3946866048760302     |
| 0 | 0 | 19.250 | -2.2022557903236897     |
| 0 | 0 | 19.500 | -2.0271599251992076     |
| 0 | 0 | 19.750 | -1.8677796584703275     |
| 0 | 0 | 20.000 | -1.7224957319853185     |
| 0 | 0 | 20.250 | -1.589788944779450      |
| 0 | 0 | 20.500 | -1.4685399614572481     |
| 0 | 0 | 20.750 | -1.3577294108445790     |
| 0 | 0 | 21.000 | -1.2563380037580403     |
| 0 | 0 | 21.250 | -1.1634003609054449     |
| 0 | 0 | 21.500 | -1.0781664432501097     |
| 0 | 0 | 21.750 | -0.9999400358474591     |
| 0 | 0 | 22.000 | -0.9280250296095148     |
| 0 | 0 | 22.250 | -0.8617713560969015     |
| 0 | 0 | 22.500 | -0.8007128951165995     |
| 0 | 0 | 22.750 | -0.7444295311612305     |
| 0 | 0 | 23.000 | -0.6925012435531457     |
| 0 | 0 | 23.250 | -0.6445295364354928     |
| 0 | 0 | 23.500 | -0.6002016164972079     |
| 0 | 0 | 23.750 | -0.5592261077488904     |
| 0 | 0 | 24.000 | -0.5213117147338464     |
| 0 | 0 | 24.250 | -0.4861799750903723     |
| 0 | 0 | 24.500 | -0.4536034858115348     |
| 0 | 0 | 24.750 | -0.4233676590215222     |
| 0 | 0 | 25.000 | -0.3952580358228685     |
| 0 | 0 | 25.250 | -0.3690778166076948     |
| 0 | 0 | 25.500 | -0.3447006035893430     |
| 0 | 0 | 25.750 | -0.3220176720084536     |
| 0 | 0 | 26.000 | -0.3009205300280023     |
| 0 | 0 | 26.250 | -0.2812984991682391     |
| 0 | 0 | 26.500 | -0.2630315007314339     |

|   |   |        |                         |
|---|---|--------|-------------------------|
| 0 | 0 | 26.750 | -0.2459971543651383     |
| 0 | 0 | 27.000 | -0.2300732897744850     |
| 0 | 0 | 27.250 | -0.2151611066097932     |
| 0 | 0 | 27.500 | -0.2012547415089030     |
| 0 | 0 | 27.750 | -0.1883717054373213     |
| 0 | 0 | 28.000 | -0.1765299255622218     |
| 0 | 0 | 28.250 | -0.1656670745824798     |
| 0 | 0 | 28.500 | -0.1553988318056094     |
| 0 | 0 | 28.750 | -0.1452604818277258     |
| 0 | 0 | 29.000 | -0.1347877857961212     |
| 0 | 0 | 29.250 | -0.1238855624676121     |
| 0 | 0 | 29.500 | -0.1139333360333052     |
| 0 | 0 | 29.750 | -0.1066794083200693     |
| 0 | 0 | 30.000 | -0.1038727066638911     |
| 1 | 0 | 4.000  | -72947.0095132162387017 |
| 1 | 0 | 4.250  | -48357.1546752302674577 |
| 1 | 0 | 4.500  | -32550.4225833419950504 |
| 1 | 0 | 4.750  | -22018.5010849302780116 |
| 1 | 0 | 5.000  | -14840.6497943678277807 |
| 1 | 0 | 5.250  | -9911.8303847122861043  |
| 1 | 0 | 5.500  | -6538.1832943677245567  |
| 1 | 0 | 5.750  | -4249.9728140316201461  |
| 1 | 0 | 6.000  | -2716.4392497683056718  |
| 1 | 0 | 6.250  | -1702.3311879628449788  |
| 1 | 0 | 6.500  | -1041.3085365344052207  |
| 1 | 0 | 6.750  | -617.1060981090283803   |
| 1 | 0 | 7.000  | -349.6261113513395458   |
| 1 | 0 | 7.250  | -184.4431872587769590   |
| 1 | 0 | 7.500  | -85.0654682766031840    |
| 1 | 0 | 7.750  | -27.3379853798831256    |
| 1 | 0 | 8.000  | 4.5257629618297051      |
| 1 | 0 | 8.250  | 20.6898485653485480     |
| 1 | 0 | 8.500  | 27.6002890923147532     |
| 1 | 0 | 8.750  | 29.2666377960485100     |
| 1 | 0 | 9.000  | 28.1407826002354966     |
| 1 | 0 | 9.250  | 25.6714574496998296     |
| 1 | 0 | 9.500  | 22.6849155526153083     |
| 1 | 0 | 9.750  | 19.6489090686726087     |
| 1 | 0 | 10.000 | 16.8010289329469273     |
| 1 | 0 | 10.250 | 14.2459394481691088     |
| 1 | 0 | 10.500 | 12.0200362755169667     |
| 1 | 0 | 10.750 | 10.1201408958293975     |
| 1 | 0 | 11.000 | 8.5264590919530647      |
| 1 | 0 | 11.250 | 7.1780907394400630      |
| 1 | 0 | 11.500 | 6.0313085494362477      |
| 1 | 0 | 11.750 | 5.0796102651296682      |
| 1 | 0 | 12.000 | 4.3144294832289507      |
| 1 | 0 | 12.250 | 3.6736107124345856      |
| 1 | 0 | 12.500 | 3.1314844058904927      |
| 1 | 0 | 12.750 | 2.6757985426286233      |
| 1 | 0 | 13.000 | 2.2942972415323899      |
| 1 | 0 | 13.250 | 1.9752594584509042      |
| 1 | 0 | 13.500 | 1.7090929851256931      |
| 1 | 0 | 13.750 | 1.4867361756686754      |
| 1 | 0 | 14.000 | 1.2991269126711802      |
| 1 | 0 | 14.250 | 1.1382053491874777      |
| 1 | 0 | 14.500 | 0.9999196775302077      |
| 1 | 0 | 14.750 | 0.8812200568958730      |
| 1 | 0 | 15.000 | 0.7790568083831398      |
| 1 | 0 | 15.250 | 0.6906129930322410      |
| 1 | 0 | 15.500 | 0.6140018553027943      |
| 1 | 0 | 15.750 | 0.5475691036765219      |
| 1 | 0 | 16.000 | 0.4896605834974287      |
| 1 | 0 | 16.250 | 0.4387705304998206      |
| 1 | 0 | 16.500 | 0.3939856744490692      |
| 1 | 0 | 16.750 | 0.3545407333798980      |
| 1 | 0 | 17.000 | 0.3196703883672818      |
| 1 | 0 | 17.250 | 0.2886781564022498      |
| 1 | 0 | 17.500 | 0.2611428583525724      |
| 1 | 0 | 17.750 | 0.2367121501146636      |
| 1 | 0 | 18.000 | 0.2150336991771344      |
| 1 | 0 | 18.250 | 0.1957708027828892      |
| 1 | 0 | 18.500 | 0.1786491381825301      |
| 1 | 0 | 18.750 | 0.1634099688932717      |
| 1 | 0 | 19.000 | 0.1497945745642689      |
| 1 | 0 | 19.250 | 0.1375624850215597      |
| 1 | 0 | 19.500 | 0.1265462603293717      |
| 1 | 0 | 19.750 | 0.1165967381835790      |
| 1 | 0 | 20.000 | 0.1075647952305490      |
| 1 | 0 | 20.250 | 0.0993176250497887      |
| 1 | 0 | 20.500 | 0.0917874968095703      |
| 1 | 0 | 20.750 | 0.0849229399199877      |
| 1 | 0 | 21.000 | 0.0786725199909898      |
| 1 | 0 | 21.250 | 0.0729853088581381      |
| 1 | 0 | 21.500 | 0.0678122444563763      |
| 1 | 0 | 21.750 | 0.0631046993784601      |
| 1 | 0 | 22.000 | 0.0588140413656759      |
| 1 | 0 | 22.250 | 0.0548954672697159      |
| 1 | 0 | 22.500 | 0.0513195044735408      |
| 1 | 0 | 22.750 | 0.0480605194545122      |
| 1 | 0 | 23.000 | 0.0450928862098445      |
| 1 | 0 | 23.250 | 0.0423889822201783      |
| 1 | 0 | 23.500 | 0.0399131822679981      |
| 1 | 0 | 23.750 | 0.0376278625337104      |

|   |   |        |                         |
|---|---|--------|-------------------------|
| 1 | 0 | 24.000 | 0.0354953898324899      |
| 1 | 0 | 24.250 | 0.0334860346531944      |
| 1 | 0 | 24.500 | 0.0316016216730795      |
| 1 | 0 | 24.750 | 0.0298518657912126      |
| 1 | 0 | 25.000 | 0.0282464871649711      |
| 1 | 0 | 25.250 | 0.0267895277991112      |
| 1 | 0 | 25.500 | 0.0254622434888379      |
| 1 | 0 | 25.750 | 0.0242401645337594      |
| 1 | 0 | 26.000 | 0.0230987957121845      |
| 1 | 0 | 26.250 | 0.0220168465614923      |
| 1 | 0 | 26.500 | 0.0209858705398802      |
| 1 | 0 | 26.750 | 0.0200005879714508      |
| 1 | 0 | 27.000 | 0.0190556595845634      |
| 1 | 0 | 27.250 | 0.0181496817755286      |
| 1 | 0 | 27.500 | 0.0172968198969249      |
| 1 | 0 | 27.750 | 0.0165149888689202      |
| 1 | 0 | 28.000 | 0.0158217970720748      |
| 1 | 0 | 28.250 | 0.0152237118885602      |
| 1 | 0 | 28.500 | 0.0146835040783794      |
| 1 | 0 | 28.750 | 0.0141531114231506      |
| 1 | 0 | 29.000 | 0.0135843388934672      |
| 1 | 0 | 29.250 | 0.0129566728541925      |
| 1 | 0 | 29.500 | 0.0123611198212103      |
| 1 | 0 | 29.750 | 0.0119166236551557      |
| 1 | 0 | 30.000 | 0.0117420515876692      |
|   |   |        |                         |
| 2 | 0 | 4.000  | -10188.8636393931665225 |
| 2 | 0 | 4.250  | -5918.0571977044965024  |
| 2 | 0 | 4.500  | -3499.6204955525245168  |
| 2 | 0 | 4.750  | -2054.9920989040801942  |
| 2 | 0 | 5.000  | -1163.0163061869679950  |
| 2 | 0 | 5.250  | -610.4791898923103872   |
| 2 | 0 | 5.500  | -276.4887302013830777   |
| 2 | 0 | 5.750  | -84.4144859173247823    |
| 2 | 0 | 6.000  | 17.2676608741403470     |
| 2 | 0 | 6.250  | 63.5497815917176467     |
| 2 | 0 | 6.500  | 77.8331579580476500     |
| 2 | 0 | 6.750  | 75.1025085981432312     |
| 2 | 0 | 7.000  | 64.5970245422515177     |
| 2 | 0 | 7.250  | 51.6420281331762681     |
| 2 | 0 | 7.500  | 39.0718650486093964     |
| 2 | 0 | 7.750  | 28.1881261670636718     |
| 2 | 0 | 8.000  | 19.4124322350324121     |
| 2 | 0 | 8.250  | 12.6991871143336539     |
| 2 | 0 | 8.500  | 7.7820982773159386      |
| 2 | 0 | 8.750  | 4.3217764029951269      |
| 2 | 0 | 9.000  | 1.9851983984331412      |
| 2 | 0 | 9.250  | 0.4770650724901486      |
| 2 | 0 | 9.500  | -0.4436893428055697     |
| 2 | 0 | 9.750  | -0.9597401687044709     |
| 2 | 0 | 10.000 | -1.2149836356196531     |
| 2 | 0 | 10.250 | -1.3007239714126371     |
| 2 | 0 | 10.500 | -1.2837178943255694     |
| 2 | 0 | 10.750 | -1.2133785900667959     |
| 2 | 0 | 11.000 | -1.1155612147851457     |
| 2 | 0 | 11.250 | -0.9930519237823070     |
| 2 | 0 | 11.500 | -0.8787240874197089     |
| 2 | 0 | 11.750 | -0.7642683962306904     |
| 2 | 0 | 12.000 | -0.6700086058223444     |
| 2 | 0 | 12.250 | -0.5864545694419423     |
| 2 | 0 | 12.500 | -0.5098347210217327     |
| 2 | 0 | 12.750 | -0.4408631534623932     |
| 2 | 0 | 13.000 | -0.3802547481498255     |
| 2 | 0 | 13.250 | -0.3283834080253367     |
| 2 | 0 | 13.500 | -0.2842688268085727     |
| 2 | 0 | 13.750 | -0.2465933800975009     |
| 2 | 0 | 14.000 | -0.2140399138658404     |
| 2 | 0 | 14.250 | -0.1854748803783224     |
| 2 | 0 | 14.500 | -0.1604992451452327     |
| 2 | 0 | 14.750 | -0.1388977539521457     |
| 2 | 0 | 15.000 | -0.1204552371506695     |
| 2 | 0 | 15.250 | -0.1049118092449932     |
| 2 | 0 | 15.500 | -0.0918287125586166     |
| 2 | 0 | 15.750 | -0.0807224407952454     |
| 2 | 0 | 16.000 | -0.0711095497615868     |
| 2 | 0 | 16.250 | -0.0625761253716544     |
| 2 | 0 | 16.500 | -0.0549860321297717     |
| 2 | 0 | 16.750 | -0.0482725427258694     |
| 2 | 0 | 17.000 | -0.0423689310862314     |
| 2 | 0 | 17.250 | -0.0372060681093576     |
| 2 | 0 | 17.500 | -0.0327050922328123     |
| 2 | 0 | 17.750 | -0.0287846866667716     |
| 2 | 0 | 18.000 | -0.0253635261000358     |
| 2 | 0 | 18.250 | -0.0223663170593021     |
| 2 | 0 | 18.500 | -0.0197418630112213     |
| 2 | 0 | 18.750 | -0.0174450046905276     |
| 2 | 0 | 19.000 | -0.0154305892722005     |
| 2 | 0 | 19.250 | -0.0136571905713642     |
| 2 | 0 | 19.500 | -0.0120982751204857     |
| 2 | 0 | 19.750 | -0.0107310524307489     |
| 2 | 0 | 20.000 | -0.0095327751727074     |
| 2 | 0 | 20.250 | -0.0084810984588669     |
| 2 | 0 | 20.500 | -0.0075551829232927     |
| 2 | 0 | 20.750 | -0.0067345398525177     |
| 2 | 0 | 21.000 | -0.0059986988454273     |

|   |   |        |                        |
|---|---|--------|------------------------|
| 2 | 0 | 21.250 | -0.0053301289315968    |
| 2 | 0 | 21.500 | -0.0047229903374358    |
| 2 | 0 | 21.750 | -0.0041743368309702    |
| 2 | 0 | 22.000 | -0.0036812124641628    |
| 2 | 0 | 22.250 | -0.0032407300421715    |
| 2 | 0 | 22.500 | -0.0028503396612959    |
| 2 | 0 | 22.750 | -0.0025075685286178    |
| 2 | 0 | 23.000 | -0.0022099430887193    |
| 2 | 0 | 23.250 | -0.0019527713589503    |
| 2 | 0 | 23.500 | -0.0017225896346039    |
| 2 | 0 | 23.750 | -0.0015037657818363    |
| 2 | 0 | 24.000 | -0.0012806886566522    |
| 2 | 0 | 24.250 | -0.0010431960751103    |
| 2 | 0 | 24.500 | -0.0008029071455497    |
| 2 | 0 | 24.750 | -0.0005769077738448    |
| 2 | 0 | 25.000 | -0.0003823620851153    |
| 2 | 0 | 25.250 | -0.0002325726899785    |
| 2 | 0 | 25.500 | -0.0001252740722845    |
| 2 | 0 | 25.750 | -0.0000543228754012    |
| 2 | 0 | 26.000 | -0.0000136432871910    |
| 2 | 0 | 26.250 | 0.0000052090291979     |
| 2 | 0 | 26.500 | 0.0000202905392888     |
| 2 | 0 | 26.750 | 0.0000519909135829     |
| 2 | 0 | 27.000 | 0.0001205457564464     |
| 2 | 0 | 27.250 | 0.0002372880966017     |
| 2 | 0 | 27.500 | 0.0003783340160175     |
| 2 | 0 | 27.750 | 0.0005109581460870     |
| 2 | 0 | 28.000 | 0.0006022362326987     |
| 2 | 0 | 28.250 | 0.0006289129775345     |
| 2 | 0 | 28.500 | 0.0006071102313077     |
| 2 | 0 | 28.750 | 0.0005628403016752     |
| 2 | 0 | 29.000 | 0.0005220021734683     |
| 2 | 0 | 29.250 | 0.0005042607271185     |
| 2 | 0 | 29.500 | 0.0005049284697776     |
| 2 | 0 | 29.750 | 0.0005132582745238     |
| 2 | 0 | 30.000 | 0.0005184421055757     |
|   |   |        |                        |
| 3 | 0 | 4.000  | 55084.1420532262127381 |
| 3 | 0 | 4.250  | 35822.6578407431661617 |
| 3 | 0 | 4.500  | 24065.1113817728837603 |
| 3 | 0 | 4.750  | 16427.9474315561128606 |
| 3 | 0 | 5.000  | 11243.4379776391633641 |
| 3 | 0 | 5.250  | 7651.0067926708888990  |
| 3 | 0 | 5.500  | 5154.0544588369648409  |
| 3 | 0 | 5.750  | 3429.6313744095687071  |
| 3 | 0 | 6.000  | 2251.4167871421664131  |
| 3 | 0 | 6.250  | 1456.3043770917124675  |
| 3 | 0 | 6.500  | 926.6798788495639201   |
| 3 | 0 | 6.750  | 578.6315233204326205   |
| 3 | 0 | 7.000  | 353.0761356768074393   |
| 3 | 0 | 7.250  | 209.1110079676159330   |
| 3 | 0 | 7.500  | 118.7779379034079739   |
| 3 | 0 | 7.750  | 63.2338052968172661    |
| 3 | 0 | 8.000  | 29.9257777289314042    |
| 3 | 0 | 8.250  | 10.6035376529339196    |
| 3 | 0 | 8.500  | -0.0803524173097658    |
| 3 | 0 | 8.750  | -5.5474974379344770    |
| 3 | 0 | 9.000  | -7.9492213244403302    |
| 3 | 0 | 9.250  | -8.6167562595916927    |
| 3 | 0 | 9.500  | -8.3485938910854784    |
| 3 | 0 | 9.750  | -7.6252302622507671    |
| 3 | 0 | 10.000 | -6.7276314557685364    |
| 3 | 0 | 10.250 | -5.8040372553138733    |
| 3 | 0 | 10.500 | -4.9348060431714300    |
| 3 | 0 | 10.750 | -4.1617796360939217    |
| 3 | 0 | 11.000 | -3.4903275667678022    |
| 3 | 0 | 11.250 | -2.9171576637451926    |
| 3 | 0 | 11.500 | -2.4234372468142595    |
| 3 | 0 | 11.750 | -2.0051999095897552    |
| 3 | 0 | 12.000 | -1.6768327072917986    |
| 3 | 0 | 12.250 | -1.4048616377372061    |
| 3 | 0 | 12.500 | -1.1755273279347920    |
| 3 | 0 | 12.750 | -0.9840370085665409    |
| 3 | 0 | 13.000 | -0.8255957299229683    |
| 3 | 0 | 13.250 | -0.6954852526889006    |
| 3 | 0 | 13.500 | -0.5892875152653179    |
| 3 | 0 | 13.750 | -0.5026584700355338    |
| 3 | 0 | 14.000 | -0.4312538052921829    |
| 3 | 0 | 14.250 | -0.3712076069120782    |
| 3 | 0 | 14.500 | -0.3205667790766769    |
| 3 | 0 | 14.750 | -0.2778563289757338    |
| 3 | 0 | 15.000 | -0.2416012769447453    |
| 3 | 0 | 15.250 | -0.2104776682887900    |
| 3 | 0 | 15.500 | -0.1837653319480428    |
| 3 | 0 | 15.750 | -0.1608950148961961    |
| 3 | 0 | 16.000 | -0.1412974576704609    |
| 3 | 0 | 16.250 | -0.1244385713518003    |
| 3 | 0 | 16.500 | -0.1099247944659179    |
| 3 | 0 | 16.750 | -0.0973976793362303    |
| 3 | 0 | 17.000 | -0.0864987363763551    |
| 3 | 0 | 17.250 | -0.0769086699743680    |
| 3 | 0 | 17.500 | -0.0684649960124951    |
| 3 | 0 | 17.750 | -0.0610444614105414    |
| 3 | 0 | 18.000 | -0.0545238167155505    |
| 3 | 0 | 18.250 | -0.0487866353089994    |

|   |   |        |                         |
|---|---|--------|-------------------------|
| 3 | 0 | 18.500 | -0.0437437567866092     |
| 3 | 0 | 18.750 | -0.0393128402700342     |
| 3 | 0 | 19.000 | -0.0354115538044966     |
| 3 | 0 | 19.250 | -0.0319636493965197     |
| 3 | 0 | 19.500 | -0.0289171951496233     |
| 3 | 0 | 19.750 | -0.0262263315604047     |
| 3 | 0 | 20.000 | -0.0238452277916181     |
| 3 | 0 | 20.250 | -0.0217290648145310     |
| 3 | 0 | 20.500 | -0.0198370370027531     |
| 3 | 0 | 20.750 | -0.0181293168265887     |
| 3 | 0 | 21.000 | -0.0165660651683420     |
| 3 | 0 | 21.250 | -0.0151147893160641     |
| 3 | 0 | 21.500 | -0.0137723617143990     |
| 3 | 0 | 21.750 | -0.0125429689948927     |
| 3 | 0 | 22.000 | -0.0114307674733440     |
| 3 | 0 | 22.250 | -0.0104375020329741     |
| 3 | 0 | 22.500 | -0.0095553532152779     |
| 3 | 0 | 22.750 | -0.0087741200559621     |
| 3 | 0 | 23.000 | -0.0080835611758394     |
| 3 | 0 | 23.250 | -0.0074714980380654     |
| 3 | 0 | 23.500 | -0.0069182039433327     |
| 3 | 0 | 23.750 | -0.0064020923401357     |
| 3 | 0 | 24.000 | -0.0059015835057578     |
| 3 | 0 | 24.250 | -0.0054029436249152     |
| 3 | 0 | 24.500 | -0.0049237903027351     |
| 3 | 0 | 24.750 | -0.0044895868162432     |
| 3 | 0 | 25.000 | -0.0041258195154856     |
| 3 | 0 | 25.250 | -0.0038488865248472     |
| 3 | 0 | 25.500 | -0.0036388326541746     |
| 3 | 0 | 25.750 | -0.0034666448335699     |
| 3 | 0 | 26.000 | -0.0033033324217809     |
| 3 | 0 | 26.250 | -0.0031254377190627     |
| 3 | 0 | 26.500 | -0.0029315379500951     |
| 3 | 0 | 26.750 | -0.0027257544266001     |
| 3 | 0 | 27.000 | -0.0025122881677807     |
| 3 | 0 | 27.250 | -0.0022963807532053     |
| 3 | 0 | 27.500 | -0.0020871407555567     |
| 3 | 0 | 27.750 | -0.0018946012383912     |
| 3 | 0 | 28.000 | -0.0017287950928234     |
| 3 | 0 | 28.250 | -0.0015968308957825     |
| 3 | 0 | 28.500 | -0.0014939232215834     |
| 3 | 0 | 28.750 | -0.0014122885822830     |
| 3 | 0 | 29.000 | -0.0013441309378676     |
| 3 | 0 | 29.250 | -0.0012838299585003     |
| 3 | 0 | 29.500 | -0.0012344232890973     |
| 3 | 0 | 29.750 | -0.0012010755039676     |
| 3 | 0 | 30.000 | -0.0011888460194909     |
| 3 | 3 | 4.000  | -50971.9472890328761423 |
| 3 | 3 | 4.250  | -32731.5137036277919833 |
| 3 | 3 | 4.500  | -21812.0370576718705706 |
| 3 | 3 | 4.750  | -14824.8943514620987116 |
| 3 | 3 | 5.000  | -10125.4848860469901410 |
| 3 | 3 | 5.250  | -6884.9337949386535911  |
| 3 | 3 | 5.500  | -4637.6080479690590437  |
| 3 | 3 | 5.750  | -3087.0078736991245023  |
| 3 | 3 | 6.000  | -2027.8702470279306453  |
| 3 | 3 | 6.250  | -1313.1147254959103066  |
| 3 | 3 | 6.500  | -836.9183656451732531   |
| 3 | 3 | 6.750  | -523.8433639282883405   |
| 3 | 3 | 7.000  | -320.8170832710259219   |
| 3 | 3 | 7.250  | -191.0905137245862022   |
| 3 | 3 | 7.500  | -109.5573538720878162   |
| 3 | 3 | 7.750  | -59.2991907482858807    |
| 3 | 3 | 8.000  | -29.0426758956628106    |
| 3 | 3 | 8.250  | -11.3829912161750588    |
| 3 | 3 | 8.500  | -1.5148041246248483     |
| 3 | 3 | 8.750  | 3.6357776401128681      |
| 3 | 3 | 9.000  | 6.0022227754622950      |
| 3 | 3 | 9.250  | 6.7843670994160759      |
| 3 | 3 | 9.500  | 6.7038729475551495      |
| 3 | 3 | 9.750  | 6.1869927042304242      |
| 3 | 3 | 10.000 | 5.4939504153029590      |
| 3 | 3 | 10.250 | 4.7589248670288757      |
| 3 | 3 | 10.500 | 4.0569123942343994      |
| 3 | 3 | 10.750 | 3.4185897731136543      |
| 3 | 3 | 11.000 | 2.8699562102525169      |
| 3 | 3 | 11.250 | 2.4105346793837161      |
| 3 | 3 | 11.500 | 2.0118229316418912      |
| 3 | 3 | 11.750 | 1.6580979540260883      |
| 3 | 3 | 12.000 | 1.3824113344696412      |
| 3 | 3 | 12.250 | 1.1564982511506932      |
| 3 | 3 | 12.500 | 0.9667854213876774      |
| 3 | 3 | 12.750 | 0.8088738391815704      |
| 3 | 3 | 13.000 | 0.6783611587645689      |
| 3 | 3 | 13.250 | 0.5710144196434828      |
| 3 | 3 | 13.500 | 0.4832703079138336      |
| 3 | 3 | 13.750 | 0.4117316264499727      |
| 3 | 3 | 14.000 | 0.3530008615904790      |
| 3 | 3 | 14.250 | 0.3040061313844281      |
| 3 | 3 | 14.500 | 0.2629767596034932      |
| 3 | 3 | 14.750 | 0.2284671005421609      |
| 3 | 3 | 15.000 | 0.1990312748913431      |
| 3 | 3 | 15.250 | 0.1734148414913871      |
| 3 | 3 | 15.500 | 0.1511295241930765      |

|   |   |        |                         |
|---|---|--------|-------------------------|
| 3 | 3 | 15.750 | 0.1318786170560738      |
| 3 | 3 | 16.000 | 0.1153652938153771      |
| 3 | 3 | 16.250 | 0.1012798234632486      |
| 3 | 3 | 16.500 | 0.0892617658189579      |
| 3 | 3 | 16.750 | 0.0789380856265314      |
| 3 | 3 | 17.000 | 0.0699357929245382      |
| 3 | 3 | 17.250 | 0.0619393715428403      |
| 3 | 3 | 17.500 | 0.0548632713812379      |
| 3 | 3 | 17.750 | 0.0486794251749018      |
| 3 | 3 | 18.000 | 0.0433597692580225      |
| 3 | 3 | 18.250 | 0.0388567469149429      |
| 3 | 3 | 18.500 | 0.0350449080916719      |
| 3 | 3 | 18.750 | 0.0317793442423147      |
| 3 | 3 | 19.000 | 0.0289151405435691      |
| 3 | 3 | 19.250 | 0.0263268000316771      |
| 3 | 3 | 19.500 | 0.0239664953327109      |
| 3 | 3 | 19.750 | 0.0218058196447985      |
| 3 | 3 | 20.000 | 0.0198163650605066      |
| 3 | 3 | 20.250 | 0.0179754011049747      |
| 3 | 3 | 20.500 | 0.0162829002383434      |
| 3 | 3 | 20.750 | 0.0147445022974936      |
| 3 | 3 | 21.000 | 0.0133658482372680      |
| 3 | 3 | 21.250 | 0.0121482020064470      |
| 3 | 3 | 21.500 | 0.0110753216510098      |
| 3 | 3 | 21.750 | 0.0101265848372811      |
| 3 | 3 | 22.000 | 0.0092813717445834      |
| 3 | 3 | 22.250 | 0.0085209636450639      |
| 3 | 3 | 22.500 | 0.0078342624198056      |
| 3 | 3 | 22.750 | 0.0072120563775204      |
| 3 | 3 | 23.000 | 0.0066451235363777      |
| 3 | 3 | 23.250 | 0.0061251733954934      |
| 3 | 3 | 23.500 | 0.0056477393731157      |
| 3 | 3 | 23.750 | 0.0052093124135391      |
| 3 | 3 | 24.000 | 0.0048063786715826      |
| 3 | 3 | 24.250 | 0.0044356753262838      |
| 3 | 3 | 24.500 | 0.0040950395449727      |
| 3 | 3 | 24.750 | 0.0037825966138078      |
| 3 | 3 | 25.000 | 0.0034964860448922      |
| 3 | 3 | 25.250 | 0.0032348054838468      |
| 3 | 3 | 25.500 | 0.0029955269005317      |
| 3 | 3 | 25.750 | 0.0027766118290947      |
| 3 | 3 | 26.000 | 0.0025760729432988      |
| 3 | 3 | 26.250 | 0.0023923010934783      |
| 3 | 3 | 26.500 | 0.0022250975964355      |
| 3 | 3 | 26.750 | 0.0020746058112150      |
| 3 | 3 | 27.000 | 0.0019409813962672      |
| 3 | 3 | 27.250 | 0.0018235125118222      |
| 3 | 3 | 27.500 | 0.0017179616060759      |
| 3 | 3 | 27.750 | 0.0016192348762554      |
| 3 | 3 | 28.000 | 0.0015222901661023      |
| 3 | 3 | 28.250 | 0.0014232559117042      |
| 3 | 3 | 28.500 | 0.0013228402720906      |
| 3 | 3 | 28.750 | 0.0012229110978925      |
| 3 | 3 | 29.000 | 0.0011253925672752      |
| 3 | 3 | 29.250 | 0.0010335271751116      |
| 3 | 3 | 29.500 | 0.0009557356140442      |
| 3 | 3 | 29.750 | 0.0009017814644032      |
| 3 | 3 | 30.000 | 0.0008815749500575      |
| 4 | 0 | 4.000  | -21976.3140251932163665 |
| 4 | 0 | 4.250  | -13091.7999571523178020 |
| 4 | 0 | 4.500  | -8344.1508040482294746  |
| 4 | 0 | 4.750  | -5571.9688094820139668  |
| 4 | 0 | 5.000  | -3804.1096416529544513  |
| 4 | 0 | 5.250  | -2609.2709125370379297  |
| 4 | 0 | 5.500  | -1780.8271047897133030  |
| 4 | 0 | 5.750  | -1203.8698918178793065  |
| 4 | 0 | 6.000  | -804.4298157475623157   |
| 4 | 0 | 6.250  | -530.7486673522142837   |
| 4 | 0 | 6.500  | -345.4480718885555461   |
| 4 | 0 | 6.750  | -221.5280065188033518   |
| 4 | 0 | 7.000  | -139.6852853094647458   |
| 4 | 0 | 7.250  | -86.3357490150189051    |
| 4 | 0 | 7.500  | -52.0409477789052559    |
| 4 | 0 | 7.750  | -30.3376513629801607    |
| 4 | 0 | 8.000  | -16.8435059677957639    |
| 4 | 0 | 8.250  | -8.6312211734377087     |
| 4 | 0 | 8.500  | -3.7660496220883033     |
| 4 | 0 | 8.750  | -0.9872954130877929     |
| 4 | 0 | 9.000  | 0.5189590463828466      |
| 4 | 0 | 9.250  | 1.2621661029520084      |
| 4 | 0 | 9.500  | 1.5669824083819890      |
| 4 | 0 | 9.750  | 1.6145320969730790      |
| 4 | 0 | 10.000 | 1.5292769446193404      |
| 4 | 0 | 10.250 | 1.3806691192398972      |
| 4 | 0 | 10.500 | 1.2098235928222536      |
| 4 | 0 | 10.750 | 1.0373745342458349      |
| 4 | 0 | 11.000 | 0.8807840651610199      |
| 4 | 0 | 11.250 | 0.7373697760476254      |
| 4 | 0 | 11.500 | 0.6163867364091562      |
| 4 | 0 | 11.750 | 0.5012154312429082      |
| 4 | 0 | 12.000 | 0.4223031401938737      |
| 4 | 0 | 12.250 | 0.3563033356228509      |
| 4 | 0 | 12.500 | 0.2956861578971575      |
| 4 | 0 | 12.750 | 0.2420794765818002      |

|   |   |        |                        |
|---|---|--------|------------------------|
| 4 | 0 | 13.000 | 0.1971100725479351     |
| 4 | 0 | 13.250 | 0.1617795476927490     |
| 4 | 0 | 13.500 | 0.1345929661841980     |
| 4 | 0 | 13.750 | 0.1134316226564596     |
| 4 | 0 | 14.000 | 0.0961771126978834     |
| 4 | 0 | 14.250 | 0.0810835726487795     |
| 4 | 0 | 14.500 | 0.0678946080508114     |
| 4 | 0 | 14.750 | 0.0567262414134584     |
| 4 | 0 | 15.000 | 0.0476946358760049     |
| 4 | 0 | 15.250 | 0.0408050379458649     |
| 4 | 0 | 15.500 | 0.0356185465828824     |
| 4 | 0 | 15.750 | 0.0315851234690696     |
| 4 | 0 | 16.000 | 0.0281547722158044     |
| 4 | 0 | 16.250 | 0.0248916240130548     |
| 4 | 0 | 16.500 | 0.0218159000907781     |
| 4 | 0 | 16.750 | 0.0190617997335550     |
| 4 | 0 | 17.000 | 0.0167635261799521     |
| 4 | 0 | 17.250 | 0.0149999087161331     |
| 4 | 0 | 17.500 | 0.0136281685068536     |
| 4 | 0 | 17.750 | 0.0124501264519998     |
| 4 | 0 | 18.000 | 0.0112676067807218     |
| 4 | 0 | 18.250 | 0.0099363788525286     |
| 4 | 0 | 18.500 | 0.0085278866241298     |
| 4 | 0 | 18.750 | 0.0071675034100360     |
| 4 | 0 | 19.000 | 0.0059806303613743     |
| 4 | 0 | 19.250 | 0.0050628394800447     |
| 4 | 0 | 19.500 | 0.0043903333827077     |
| 4 | 0 | 19.750 | 0.0039094647932711     |
| 4 | 0 | 20.000 | 0.0035666056951422     |
| 4 | 0 | 20.250 | 0.0033113293276799     |
| 4 | 0 | 20.500 | 0.0031059789241075     |
| 4 | 0 | 20.750 | 0.0029160741217076     |
| 4 | 0 | 21.000 | 0.0027071633111063     |
| 4 | 0 | 21.250 | 0.002454381312755      |
| 4 | 0 | 21.500 | 0.0021796257140826     |
| 4 | 0 | 21.750 | 0.0019090639652259     |
| 4 | 0 | 22.000 | 0.0016730969290407     |
| 4 | 0 | 22.250 | 0.0014937373444230     |
| 4 | 0 | 22.500 | 0.0013636729131593     |
| 4 | 0 | 22.750 | 0.0012682515935779     |
| 4 | 0 | 23.000 | 0.0011928098871760     |
| 4 | 0 | 23.250 | 0.0011243231527326     |
| 4 | 0 | 23.500 | 0.0010563130479389     |
| 4 | 0 | 23.750 | 0.0009839341571565     |
| 4 | 0 | 24.000 | 0.0009023148870246     |
| 4 | 0 | 24.250 | 0.0008086342342919     |
| 4 | 0 | 24.500 | 0.0007083352749364     |
| 4 | 0 | 24.750 | 0.0006089384268832     |
| 4 | 0 | 25.000 | 0.0005179853383887     |
| 4 | 0 | 25.250 | 0.0004418029307490     |
| 4 | 0 | 25.500 | 0.0003819189680017     |
| 4 | 0 | 25.750 | 0.0003386256288798     |
| 4 | 0 | 26.000 | 0.0003122014589159     |
| 4 | 0 | 26.250 | 0.0003008903991487     |
| 4 | 0 | 26.500 | 0.0002947022740186     |
| 4 | 0 | 26.750 | 0.0002815403768070     |
| 4 | 0 | 27.000 | 0.0002492067569070     |
| 4 | 0 | 27.250 | 0.0001906816160810     |
| 4 | 0 | 27.500 | 0.0001201024904078     |
| 4 | 0 | 27.750 | 0.0000569906469724     |
| 4 | 0 | 28.000 | 0.0000208870808238     |
| 4 | 0 | 28.250 | 0.0000249289702024     |
| 4 | 0 | 28.500 | 0.0000568967061941     |
| 4 | 0 | 28.750 | 0.0000983877069879     |
| 4 | 0 | 29.000 | 0.0001311926602231     |
| 4 | 0 | 29.250 | 0.0001419419030229     |
| 4 | 0 | 29.500 | 0.0001363195695268     |
| 4 | 0 | 29.750 | 0.0001248938423518     |
| 4 | 0 | 30.000 | 0.0001186090500221     |
| 4 | 3 | 4.000  | 51368.6408631360754953 |
| 4 | 3 | 4.250  | 31105.7534952391579282 |
| 4 | 3 | 4.500  | 20021.2096587495798303 |
| 4 | 3 | 4.750  | 13407.8412963943483192 |
| 4 | 3 | 5.000  | 9134.1905772779518884  |
| 4 | 3 | 5.250  | 6233.2823181507801564  |
| 4 | 3 | 5.500  | 4225.4293230514667812  |
| 4 | 3 | 5.750  | 2834.1013132417451743  |
| 4 | 3 | 6.000  | 1877.4251521609965039  |
| 4 | 3 | 6.250  | 1227.0614081691587671  |
| 4 | 3 | 6.500  | 790.5070089852189312   |
| 4 | 3 | 6.750  | 501.2779462763471088   |
| 4 | 3 | 7.000  | 312.1755375243984076   |
| 4 | 3 | 7.250  | 190.2245443990544800   |
| 4 | 3 | 7.500  | 112.7420331711695951   |
| 4 | 3 | 7.750  | 64.3331564580401931    |
| 4 | 3 | 8.000  | 34.6693082397548551    |
| 4 | 3 | 8.250  | 16.9208104986520098    |
| 4 | 3 | 8.500  | 6.6250392204957347     |
| 4 | 3 | 8.750  | 0.9044776965404584     |
| 4 | 3 | 9.000  | -2.0708501876088325    |
| 4 | 3 | 9.250  | -3.4294923678160520    |
| 4 | 3 | 9.500  | -3.8784418052120988    |
| 4 | 3 | 9.750  | -3.8382449872641873    |
| 4 | 3 | 10.000 | -3.5433764344175009    |



|   |   |        |                        |
|---|---|--------|------------------------|
| 4 | 3 | 10.250 | -3.1436231088224487    |
| 4 | 3 | 10.500 | -2.7215297688998454    |
| 4 | 3 | 10.750 | -2.3256796519024650    |
| 4 | 3 | 11.000 | -1.9689180540411926    |
| 4 | 3 | 11.250 | -1.6372854546068263    |
| 4 | 3 | 11.500 | -1.3520619807175722    |
| 4 | 3 | 11.750 | -1.1134145724621232    |
| 4 | 3 | 12.000 | -0.9203083359572835    |
| 4 | 3 | 12.250 | -0.7598028177366840    |
| 4 | 3 | 12.500 | -0.6258432552681436    |
| 4 | 3 | 12.750 | -0.5152083836874805    |
| 4 | 3 | 13.000 | -0.4246738771546085    |
| 4 | 3 | 13.250 | -0.3511249245315455    |
| 4 | 3 | 13.500 | -0.2918807946009957    |
| 4 | 3 | 13.750 | -0.2443684672290923    |
| 4 | 3 | 14.000 | -0.2060148192547514    |
| 4 | 3 | 14.250 | -0.1745045276421136    |
| 4 | 3 | 14.500 | -0.1485518031702522    |
| 4 | 3 | 14.750 | -0.1271278478916603    |
| 4 | 3 | 15.000 | -0.1092034477928586    |
| 4 | 3 | 15.250 | -0.0938776834891379    |
| 4 | 3 | 15.500 | -0.0807638143727372    |
| 4 | 3 | 15.750 | -0.0696037321603575    |
| 4 | 3 | 16.000 | -0.0601390404926173    |
| 4 | 3 | 16.250 | -0.0521197883114768    |
| 4 | 3 | 16.500 | -0.0453315968459600    |
| 4 | 3 | 16.750 | -0.0395692217062002    |
| 4 | 3 | 17.000 | -0.0346274731105473    |
| 4 | 3 | 17.250 | -0.0303248852411021    |
| 4 | 3 | 17.500 | -0.0265749273241274    |
| 4 | 3 | 17.750 | -0.0233148040851201    |
| 4 | 3 | 18.000 | -0.0204817011960579    |
| 4 | 3 | 18.250 | -0.0180192605562669    |
| 4 | 3 | 18.500 | -0.0158971259141420    |
| 4 | 3 | 18.750 | -0.0140914572537827    |
| 4 | 3 | 19.000 | -0.0125784243215357    |
| 4 | 3 | 19.250 | -0.0113269884185966    |
| 4 | 3 | 19.500 | -0.0102773557829176    |
| 4 | 3 | 19.750 | -0.0093625541286947    |
| 4 | 3 | 20.000 | -0.0085156112104676    |
| 4 | 3 | 20.250 | -0.0076850141283219    |
| 4 | 3 | 20.500 | -0.0068810711775698    |
| 4 | 3 | 20.750 | -0.0061295781115512    |
| 4 | 3 | 21.000 | -0.0054563626315346    |
| 4 | 3 | 21.250 | -0.0048802314620947    |
| 4 | 3 | 21.500 | -0.0043918185240392    |
| 4 | 3 | 21.750 | -0.0039747002233121    |
| 4 | 3 | 22.000 | -0.0036125010557621    |
| 4 | 3 | 22.250 | -0.0032904345095374    |
| 4 | 3 | 22.500 | -0.0029998794015164    |
| 4 | 3 | 22.750 | -0.0027337375647150    |
| 4 | 3 | 23.000 | -0.0024848678253989    |
| 4 | 3 | 23.250 | -0.0022485969891881    |
| 4 | 3 | 23.500 | -0.0020301228941374    |
| 4 | 3 | 23.750 | -0.0018371416849035    |
| 4 | 3 | 24.000 | -0.0016773492860022    |
| 4 | 3 | 24.250 | -0.0015543113329185    |
| 4 | 3 | 24.500 | -0.0014550158431967    |
| 4 | 3 | 24.750 | -0.0013623112837377    |
| 4 | 3 | 25.000 | -0.0012590668676014    |
| 4 | 3 | 25.250 | -0.0011337608931297    |
| 4 | 3 | 25.500 | -0.0009971879355449    |
| 4 | 3 | 25.750 | -0.0008657151756398    |
| 4 | 3 | 26.000 | -0.0007556912812187    |
| 4 | 3 | 26.250 | -0.0006789963486572    |
| 4 | 3 | 26.500 | -0.0006297670596721    |
| 4 | 3 | 26.750 | -0.0005977440381861    |
| 4 | 3 | 27.000 | -0.0005727408609988    |
| 4 | 3 | 27.250 | -0.0005465556422222    |
| 4 | 3 | 27.500 | -0.0005184749601676    |
| 4 | 3 | 27.750 | -0.0004894861373861    |
| 4 | 3 | 28.000 | -0.0004604183374858    |
| 4 | 3 | 28.250 | -0.0004317526304175    |
| 4 | 3 | 28.500 | -0.0004028252381646    |
| 4 | 3 | 28.750 | -0.0003725836859414    |
| 4 | 3 | 29.000 | -0.0003397266993142    |
| 4 | 3 | 29.250 | -0.0003040970390961    |
| 4 | 3 | 29.500 | -0.0002708391949547    |
| 4 | 3 | 29.750 | -0.0002464095132110    |
| 4 | 3 | 30.000 | -0.0002369458888141    |
| 5 | 0 | 4.000  | -3682.9063731138298863 |
| 5 | 0 | 4.250  | -2048.9510360174817833 |
| 5 | 0 | 4.500  | -1239.9342938132217569 |
| 5 | 0 | 4.750  | -798.1569929367552731  |
| 5 | 0 | 5.000  | -529.8182342468718389  |
| 5 | 0 | 5.250  | -354.2666345309282860  |
| 5 | 0 | 5.500  | -235.4524238558641684  |
| 5 | 0 | 5.750  | -154.5167133820364427  |
| 5 | 0 | 6.000  | -99.7642432014230707   |
| 5 | 0 | 6.250  | -63.2122925030845693   |
| 5 | 0 | 6.500  | -39.2571287452911122   |
| 5 | 0 | 6.750  | -23.8072517521666001   |
| 5 | 0 | 7.000  | -14.0511924161449500   |
| 5 | 0 | 7.250  | -8.0220376087370600    |

|   |   |        |                         |
|---|---|--------|-------------------------|
| 5 | 0 | 7.500  | -4.3794391717142060     |
| 5 | 0 | 7.750  | -2.2350133531543506     |
| 5 | 0 | 8.000  | -1.0135844829581879     |
| 5 | 0 | 8.250  | -0.3491881336131994     |
| 5 | 0 | 8.500  | -0.0107824668566241     |
| 5 | 0 | 8.750  | 0.1414242639752889      |
| 5 | 0 | 9.000  | 0.1941227563818277      |
| 5 | 0 | 9.250  | 0.1962163126166351      |
| 5 | 0 | 9.500  | 0.1799685969334638      |
| 5 | 0 | 9.750  | 0.1504210462892578      |
| 5 | 0 | 10.000 | 0.1230116206313052      |
| 5 | 0 | 10.250 | 0.0995353143696839      |
| 5 | 0 | 10.500 | 0.0790000006318233      |
| 5 | 0 | 10.750 | 0.0666944677961780      |
| 5 | 0 | 11.000 | 0.0497879536623405      |
| 5 | 0 | 11.250 | 0.0377050609213282      |
| 5 | 0 | 11.500 | 0.0336227952900865      |
| 5 | 0 | 11.750 | 0.0324781447048832      |
| 5 | 0 | 12.000 | 0.0207767429833441      |
| 5 | 0 | 12.250 | 0.0118442275024206      |
| 5 | 0 | 12.500 | 0.0083387792316713      |
| 5 | 0 | 12.750 | 0.0080009934707020      |
| 5 | 0 | 13.000 | 0.0085724025874682      |
| 5 | 0 | 13.250 | 0.0082492721237474      |
| 5 | 0 | 13.500 | 0.0070481421994592      |
| 5 | 0 | 13.750 | 0.0054408779643694      |
| 5 | 0 | 14.000 | 0.0038993717651172      |
| 5 | 0 | 14.250 | 0.0027952533563456      |
| 5 | 0 | 14.500 | 0.0020996752710289      |
| 5 | 0 | 14.750 | 0.0016836526043407      |
| 5 | 0 | 15.000 | 0.0014181048692445      |
| 5 | 0 | 15.250 | 0.0011952205162201      |
| 5 | 0 | 15.500 | 0.0009926348630289      |
| 5 | 0 | 15.750 | 0.0008094173106986      |
| 5 | 0 | 16.000 | 0.0006446032191950      |
| 5 | 0 | 16.250 | 0.0004982919931534      |
| 5 | 0 | 16.500 | 0.0003751606091891      |
| 5 | 0 | 16.750 | 0.0002810789068897      |
| 5 | 0 | 17.000 | 0.0002218948313987      |
| 5 | 0 | 17.250 | 0.0002000444119112      |
| 5 | 0 | 17.500 | 0.0002044560562919      |
| 5 | 0 | 17.750 | 0.0002206978302549      |
| 5 | 0 | 18.000 | 0.0002343485102139      |
| 5 | 0 | 18.250 | 0.0002343718310058      |
| 5 | 0 | 18.500 | 0.0002232715625201      |
| 5 | 0 | 18.750 | 0.0002069274940390      |
| 5 | 0 | 19.000 | 0.0001912017209504      |
| 5 | 0 | 19.250 | 0.0001800862253107      |
| 5 | 0 | 19.500 | 0.0001701394711556      |
| 5 | 0 | 19.750 | 0.0001560624620279      |
| 5 | 0 | 20.000 | 0.0001325547709235      |
| 5 | 0 | 20.250 | 0.0000963558780015      |
| 5 | 0 | 20.500 | 0.0000523669389634      |
| 5 | 0 | 20.750 | 0.0000075103382477      |
| 5 | 0 | 21.000 | -0.0000313463625261     |
| 5 | 0 | 21.250 | -0.0000590101896629     |
| 5 | 0 | 21.500 | -0.0000768477711991     |
| 5 | 0 | 21.750 | -0.0000878687089267     |
| 5 | 0 | 22.000 | -0.0000951144769785     |
| 5 | 0 | 22.250 | -0.0001005245956519     |
| 5 | 0 | 22.500 | -0.0001014107684750     |
| 5 | 0 | 22.750 | -0.0000939020492440     |
| 5 | 0 | 23.000 | -0.00007411066450124    |
| 5 | 0 | 23.250 | -0.0000410973256141     |
| 5 | 0 | 23.500 | -0.0000057094240032     |
| 5 | 0 | 23.750 | 0.0000182519900704      |
| 5 | 0 | 24.000 | 0.0000169660893949      |
| 5 | 0 | 24.250 | -0.0000180699274261     |
| 5 | 0 | 24.500 | -0.0000740262502551     |
| 5 | 0 | 24.750 | -0.0001327234965287     |
| 5 | 0 | 25.000 | -0.0001759604277130     |
| 5 | 0 | 25.250 | -0.0001899658702583     |
| 5 | 0 | 25.500 | -0.0001785894477211     |
| 5 | 0 | 25.750 | -0.0001500717761532     |
| 5 | 0 | 26.000 | -0.0001126089325527     |
| 5 | 0 | 26.250 | -0.0000737788667051     |
| 5 | 0 | 26.500 | -0.0000389333153912     |
| 5 | 0 | 26.750 | -0.0000128956850576     |
| 5 | 0 | 27.000 | -0.0000005222788496     |
| 5 | 0 | 27.250 | -0.0000049338452400     |
| 5 | 0 | 27.500 | -0.0000221512496779     |
| 5 | 0 | 27.750 | -0.0000463436969279     |
| 5 | 0 | 28.000 | -0.0000716040826698     |
| 5 | 0 | 28.250 | -0.0000927612769742     |
| 5 | 0 | 28.500 | -0.0001077438263305     |
| 5 | 0 | 28.750 | -0.0001152323423184     |
| 5 | 0 | 29.000 | -0.0001138172495302     |
| 5 | 0 | 29.250 | -0.0001032227508585     |
| 5 | 0 | 29.500 | -0.0000881730384206     |
| 5 | 0 | 29.750 | -0.0000747042936491     |
| 5 | 0 | 30.000 | -0.0000688719768370     |
| 5 | 3 | 4.000  | -20164.2156196051510051 |
| 5 | 3 | 4.250  | -11469.3044689693415421 |
| 5 | 3 | 4.500  | -7058.0124103360103618  |

|   |   |        |                        |
|---|---|--------|------------------------|
| 5 | 3 | 4.750  | -4610.6097728296663263 |
| 5 | 3 | 5.000  | -3108.6144934261774324 |
| 5 | 3 | 5.250  | -2116.4321359129530720 |
| 5 | 3 | 5.500  | -1436.9932564706173252 |
| 5 | 3 | 5.750  | -967.2554394997257532  |
| 5 | 3 | 6.000  | -643.8632592639128234  |
| 5 | 3 | 6.250  | -423.4699517066462704  |
| 5 | 3 | 6.500  | -275.0068124827487281  |
| 5 | 3 | 6.750  | -176.2757786368829045  |
| 5 | 3 | 7.000  | -111.3850794263420596  |
| 5 | 3 | 7.250  | -69.2431009391675190   |
| 5 | 3 | 7.500  | -42.2184870979712983   |
| 5 | 3 | 7.750  | -25.1211058028191090   |
| 5 | 3 | 8.000  | -14.4677530754247314   |
| 5 | 3 | 8.250  | -7.9449318807478679    |
| 5 | 3 | 8.500  | -4.0348969832420067    |
| 5 | 3 | 8.750  | -1.7498848854327242    |
| 5 | 3 | 9.000  | -0.4622045730631741    |
| 5 | 3 | 9.250  | 0.2291253170445398     |
| 5 | 3 | 9.500  | 0.5713172728260134     |
| 5 | 3 | 9.750  | 0.7105564166568850     |
| 5 | 3 | 10.000 | 0.7312734928729197     |
| 5 | 3 | 10.250 | 0.6915010320063922     |
| 5 | 3 | 10.500 | 0.6238632394272932     |
| 5 | 3 | 10.750 | 0.5445679010519067     |
| 5 | 3 | 11.000 | 0.4510018106376281     |
| 5 | 3 | 11.250 | 0.4073607696786155     |
| 5 | 3 | 11.500 | 0.3518893065258952     |
| 5 | 3 | 11.750 | 0.2738567860004723     |
| 5 | 3 | 12.000 | 0.2301471887569625     |
| 5 | 3 | 12.250 | 0.1958578840194211     |
| 5 | 3 | 12.500 | 0.1620056920660936     |
| 5 | 3 | 12.750 | 0.1305792559745366     |
| 5 | 3 | 13.000 | 0.1035658528680938     |
| 5 | 3 | 13.250 | 0.0824420081829829     |
| 5 | 3 | 13.500 | 0.0666440378631996     |
| 5 | 3 | 13.750 | 0.0550983493173974     |
| 5 | 3 | 14.000 | 0.0467315998493942     |
| 5 | 3 | 14.250 | 0.0405394024415089     |
| 5 | 3 | 14.500 | 0.0357920036660270     |
| 5 | 3 | 14.750 | 0.0318281310133707     |
| 5 | 3 | 15.000 | 0.0279863162567290     |
| 5 | 3 | 15.250 | 0.0237846207729415     |
| 5 | 3 | 15.500 | 0.0194596368985964     |
| 5 | 3 | 15.750 | 0.0154276069540202     |
| 5 | 3 | 16.000 | 0.0121045762060417     |
| 5 | 3 | 16.250 | 0.0097837405657009     |
| 5 | 3 | 16.500 | 0.0082679109012146     |
| 5 | 3 | 16.750 | 0.0072374500848900     |
| 5 | 3 | 17.000 | 0.0063727632928066     |
| 5 | 3 | 17.250 | 0.0054301630025832     |
| 5 | 3 | 17.500 | 0.0044695769596387     |
| 5 | 3 | 17.750 | 0.0036268395493579     |
| 5 | 3 | 18.000 | 0.0030378018972111     |
| 5 | 3 | 18.250 | 0.0027883537640158     |
| 5 | 3 | 18.500 | 0.0027646260502918     |
| 5 | 3 | 18.750 | 0.0028028496169502     |
| 5 | 3 | 19.000 | 0.0027392852300080     |
| 5 | 3 | 19.250 | 0.0024567430213216     |
| 5 | 3 | 19.500 | 0.0020241065076835     |
| 5 | 3 | 19.750 | 0.0015567731814237     |
| 5 | 3 | 20.000 | 0.0011701664467890     |
| 5 | 3 | 20.250 | 0.0009496086826024     |
| 5 | 3 | 20.500 | 0.0008599564573128     |
| 5 | 3 | 20.750 | 0.0008359664915971     |
| 5 | 3 | 21.000 | 0.0008124545691783     |
| 5 | 3 | 21.250 | 0.0007393875815410     |
| 5 | 3 | 21.500 | 0.0006272723102683     |
| 5 | 3 | 21.750 | 0.0005017215847705     |
| 5 | 3 | 22.000 | 0.0003884138494429     |
| 5 | 3 | 22.250 | 0.0003069757069167     |
| 5 | 3 | 22.500 | 0.0002526280459100     |
| 5 | 3 | 22.750 | 0.0002144517729397     |
| 5 | 3 | 23.000 | 0.0001815110387615     |
| 5 | 3 | 23.250 | 0.0001462252580951     |
| 5 | 3 | 23.500 | 0.0001143135275933     |
| 5 | 3 | 23.750 | 0.0000947758060581     |
| 5 | 3 | 24.000 | 0.0000965579331671     |
| 5 | 3 | 24.250 | 0.0001239413541150     |
| 5 | 3 | 24.500 | 0.0001627312054453     |
| 5 | 3 | 24.750 | 0.0001940787074987     |
| 5 | 3 | 25.000 | 0.0001990794587968     |
| 5 | 3 | 25.250 | 0.0001649356545612     |
| 5 | 3 | 25.500 | 0.0001036629656817     |
| 5 | 3 | 25.750 | 0.0000335438979315     |
| 5 | 3 | 26.000 | -0.0000271754553135    |
| 5 | 3 | 26.250 | -0.0000641180939690    |
| 5 | 3 | 26.500 | -0.0000783854283095    |
| 5 | 3 | 26.750 | -0.0000749165156941    |
| 5 | 3 | 27.000 | -0.0000586505959161    |
| 5 | 3 | 27.250 | -0.0000346390799801    |
| 5 | 3 | 27.500 | -0.0000083196298643    |
| 5 | 3 | 27.750 | 0.0000148337865313     |
| 5 | 3 | 28.000 | 0.0000294409188789     |
| 5 | 3 | 28.250 | 0.0000315459073875     |

|   |   |        |                     |
|---|---|--------|---------------------|
| 5 | 3 | 28.500 | 0.0000227178913978  |
| 5 | 3 | 28.750 | 0.0000059576291780  |
| 5 | 3 | 29.000 | -0.0000156041877457 |
| 5 | 3 | 29.250 | -0.0000387054175310 |
| 5 | 3 | 29.500 | -0.0000598386814562 |
| 5 | 3 | 29.750 | -0.0000753737920014 |
| 5 | 3 | 30.000 | -0.0000814508664062 |

|   |   |        |                        |
|---|---|--------|------------------------|
| 6 | 0 | 4.000  | 12017.5746272215292265 |
| 6 | 0 | 4.250  | 5871.7881585655377421  |
| 6 | 0 | 4.500  | 3096.6097147331220185  |
| 6 | 0 | 4.750  | 1783.2789970396279386  |
| 6 | 0 | 5.000  | 1101.5066585409094841  |
| 6 | 0 | 5.250  | 708.6524442638024084   |
| 6 | 0 | 5.500  | 463.6787550108792857   |
| 6 | 0 | 5.750  | 304.1194147464018442   |
| 6 | 0 | 6.000  | 198.4384743563575739   |
| 6 | 0 | 6.250  | 128.3303088102301217   |
| 6 | 0 | 6.500  | 82.1014381804033917    |
| 6 | 0 | 6.750  | 51.9048768581240054    |
| 6 | 0 | 7.000  | 32.3915629289387539    |
| 6 | 0 | 7.250  | 19.9185978989144559    |
| 6 | 0 | 7.500  | 12.0332589953068165    |
| 6 | 0 | 7.750  | 7.1143957054841493     |
| 6 | 0 | 8.000  | 4.0887297029982150     |
| 6 | 0 | 8.250  | 2.2616353205389075     |
| 6 | 0 | 8.500  | 1.1838523059820005     |
| 6 | 0 | 8.750  | 0.5676835608605870     |
| 6 | 0 | 9.000  | 0.2246889724228112     |
| 6 | 0 | 9.250  | 0.0437158036493877     |
| 6 | 0 | 9.500  | -0.0446746320919083    |
| 6 | 0 | 9.750  | -0.0849167098785664    |
| 6 | 0 | 10.000 | -0.0955727035231995    |
| 6 | 0 | 10.250 | -0.0927929014945725    |
| 6 | 0 | 10.500 | -0.0840563345779604    |
| 6 | 0 | 10.750 | -0.0671309753020690    |
| 6 | 0 | 11.000 | -0.0670312905020776    |
| 6 | 0 | 11.250 | -0.0553040153705311    |
| 6 | 0 | 11.500 | -0.0442564971332766    |
| 6 | 0 | 11.750 | -0.0413467867345485    |
| 6 | 0 | 12.000 | -0.0317900389535994    |
| 6 | 0 | 12.250 | -0.0235484724421058    |
| 6 | 0 | 12.500 | -0.0187728449009468    |
| 6 | 0 | 12.750 | -0.0161047035359849    |
| 6 | 0 | 13.000 | -0.0141876407617096    |
| 6 | 0 | 13.250 | -0.0119528135906113    |
| 6 | 0 | 13.500 | -0.0094876762128959    |
| 6 | 0 | 13.750 | -0.0071696300430086    |
| 6 | 0 | 14.000 | -0.0053762918348745    |
| 6 | 0 | 14.250 | -0.0043691777841477    |
| 6 | 0 | 14.500 | -0.0039461971291630    |
| 6 | 0 | 14.750 | -0.0037894104607727    |
| 6 | 0 | 15.000 | -0.0035807570451567    |
| 6 | 0 | 15.250 | -0.0030831644251323    |
| 6 | 0 | 15.500 | -0.0023839800951715    |
| 6 | 0 | 15.750 | -0.0016516773439457    |
| 6 | 0 | 16.000 | -0.0010545074319253    |
| 6 | 0 | 16.250 | -0.0007195089276257    |
| 6 | 0 | 16.500 | -0.0006099904584692    |
| 6 | 0 | 16.750 | -0.0006485017829160    |
| 6 | 0 | 17.000 | -0.0007576384865285    |
| 6 | 0 | 17.250 | -0.0008679312485042    |
| 6 | 0 | 17.500 | -0.0009417122328986    |
| 6 | 0 | 17.750 | -0.0009493000321173    |
| 6 | 0 | 18.000 | -0.0008610403643154    |
| 6 | 0 | 18.250 | -0.0006614866403423    |
| 6 | 0 | 18.500 | -0.0003919220819461    |
| 6 | 0 | 18.750 | -0.0001077906353278    |
| 6 | 0 | 19.000 | 0.0001354552982581     |
| 6 | 0 | 19.250 | 0.0002937404209916     |
| 6 | 0 | 19.500 | 0.0003686232114879     |
| 6 | 0 | 19.750 | 0.0003731049034255     |
| 6 | 0 | 20.000 | 0.0003202466629929     |
| 6 | 0 | 20.250 | 0.0002257102639019     |
| 6 | 0 | 20.500 | 0.0001154509498652     |
| 6 | 0 | 20.750 | 0.0000180088909158     |
| 6 | 0 | 21.000 | -0.0000380174571998    |
| 6 | 0 | 21.250 | -0.0000330582501445    |
| 6 | 0 | 21.500 | 0.0000160920559743     |
| 6 | 0 | 21.750 | 0.0000834920873181     |
| 6 | 0 | 22.000 | 0.0001431737987254     |
| 6 | 0 | 22.250 | 0.0001749406414558     |
| 6 | 0 | 22.500 | 0.0001816224817213     |
| 6 | 0 | 22.750 | 0.0001717812339424     |
| 6 | 0 | 23.000 | 0.0001538955391059     |
| 6 | 0 | 23.250 | 0.0001354177886100     |
| 6 | 0 | 23.500 | 0.0001199214822469     |
| 6 | 0 | 23.750 | 0.0001100365632957     |
| 6 | 0 | 24.000 | 0.0001083858197456     |
| 6 | 0 | 24.250 | 0.0001163068746313     |
| 6 | 0 | 24.500 | 0.0001301072552614     |
| 6 | 0 | 24.750 | 0.0001448424717830     |
| 6 | 0 | 25.000 | 0.0001555554547407     |
| 6 | 0 | 25.250 | 0.0001580600809126     |

|   |   |        |                        |
|---|---|--------|------------------------|
| 6 | 0 | 25.500 | 0.0001512473478423     |
| 6 | 0 | 25.750 | 0.0001347656546919     |
| 6 | 0 | 26.000 | 0.0001082368319655     |
| 6 | 0 | 26.250 | 0.0000733361906268     |
| 6 | 0 | 26.500 | 0.0000400815046524     |
| 6 | 0 | 26.750 | 0.0000205945929763     |
| 6 | 0 | 27.000 | 0.0000269869923179     |
| 6 | 0 | 27.250 | 0.0000662246412492     |
| 6 | 0 | 27.500 | 0.0001246915428107     |
| 6 | 0 | 27.750 | 0.0001836079982411     |
| 6 | 0 | 28.000 | 0.0002241837336380     |
| 6 | 0 | 28.250 | 0.0002327022913583     |
| 6 | 0 | 28.500 | 0.0002158075068317     |
| 6 | 0 | 28.750 | 0.0001851974649917     |
| 6 | 0 | 29.000 | 0.0001525358658064     |
| 6 | 0 | 29.250 | 0.0001274179304503     |
| 6 | 0 | 29.500 | 0.0001109905820534     |
| 6 | 0 | 29.750 | 0.0001021550179287     |
| 6 | 0 | 30.000 | 0.0000995435181254     |
| 6 | 3 | 4.000  | -9097.9171542074291210 |
| 6 | 3 | 4.250  | -4288.3908708599883539 |
| 6 | 3 | 4.500  | -2135.5487355408781696 |
| 6 | 3 | 4.750  | -1146.0569543283756957 |
| 6 | 3 | 5.000  | -659.3061588923922045  |
| 6 | 3 | 5.250  | -397.9764711393135030  |
| 6 | 3 | 5.500  | -246.5716940606781691  |
| 6 | 3 | 5.750  | -154.3637752239479823  |
| 6 | 3 | 6.000  | -96.7197019551513790   |
| 6 | 3 | 6.250  | -60.3320146409994322   |
| 6 | 3 | 6.500  | -37.3661080265264545   |
| 6 | 3 | 6.750  | -22.9296647134953275   |
| 6 | 3 | 7.000  | -13.9183221197010436   |
| 6 | 3 | 7.250  | -8.3498963733327010    |
| 6 | 3 | 7.500  | -4.9396977397186959    |
| 6 | 3 | 7.750  | -2.87893027117323046   |
| 6 | 3 | 8.000  | -1.6487016055464991    |
| 6 | 3 | 8.250  | -0.9226995412591465    |
| 6 | 3 | 8.500  | -0.5010627600557305    |
| 6 | 3 | 8.750  | -0.2590499014702652    |
| 6 | 3 | 9.000  | -0.1210714386854537    |
| 6 | 3 | 9.250  | -0.0466683546877878    |
| 6 | 3 | 9.500  | -0.0070849080974666    |
| 6 | 3 | 9.750  | 0.0188118385083630     |
| 6 | 3 | 10.000 | 0.0263081365261543     |
| 6 | 3 | 10.250 | 0.0279497439566864     |
| 6 | 3 | 10.500 | 0.0258389377377166     |
| 6 | 3 | 10.750 | 0.0309077754458897     |
| 6 | 3 | 11.000 | 0.0165603496497324     |
| 6 | 3 | 11.250 | 0.0082351436995366     |
| 6 | 3 | 11.500 | 0.0048654456666059     |
| 6 | 3 | 11.750 | 0.0201833172619476     |
| 6 | 3 | 12.000 | 0.0112027580493877     |
| 6 | 3 | 12.250 | 0.0021741302342610     |
| 6 | 3 | 12.500 | 0.0004193598805303     |
| 6 | 3 | 12.750 | 0.0026752284048651     |
| 6 | 3 | 13.000 | 0.0056815277521521     |
| 6 | 3 | 13.250 | 0.0068405606368220     |
| 6 | 3 | 13.500 | 0.0062030585346653     |
| 6 | 3 | 13.750 | 0.0044819705807643     |
| 6 | 3 | 14.000 | 0.0023899344047641     |
| 6 | 3 | 14.250 | 0.0005345773167818     |
| 6 | 3 | 14.500 | -0.0008945994440194    |
| 6 | 3 | 14.750 | -0.0018123098593064    |
| 6 | 3 | 15.000 | -0.0021330094642436    |
| 6 | 3 | 15.250 | -0.0018322838314685    |
| 6 | 3 | 15.500 | -0.0011306499273618    |
| 6 | 3 | 15.750 | -0.0003098807417377    |
| 6 | 3 | 16.000 | 0.0003484933196437     |
| 6 | 3 | 16.250 | 0.0006362837243874     |
| 6 | 3 | 16.500 | 0.0006374909636313     |
| 6 | 3 | 16.750 | 0.0005089880671687     |
| 6 | 3 | 17.000 | 0.0004076188023386     |
| 6 | 3 | 17.250 | 0.0004482432672363     |
| 6 | 3 | 17.500 | 0.0005777212794507     |
| 6 | 3 | 17.750 | 0.0007008842650572     |
| 6 | 3 | 18.000 | 0.0007225814678103     |
| 6 | 3 | 18.250 | 0.0005778910427713     |
| 6 | 3 | 18.500 | 0.0003227829493468     |
| 6 | 3 | 18.750 | 0.0000434366316115     |
| 6 | 3 | 19.000 | -0.0001740205906882    |
| 6 | 3 | 19.250 | -0.0002646381377723    |
| 6 | 3 | 19.500 | -0.0002480405833310    |
| 6 | 3 | 19.750 | -0.0001650044160599    |
| 6 | 3 | 20.000 | -0.0000563075260616    |
| 6 | 3 | 20.250 | 0.0000432410623832     |
| 6 | 3 | 20.500 | 0.0001227221054199     |
| 6 | 3 | 20.750 | 0.0001771863313477     |
| 6 | 3 | 21.000 | 0.0002016428265480     |
| 6 | 3 | 21.250 | 0.0001940164331140     |
| 6 | 3 | 21.500 | 0.0001639253023857     |
| 6 | 3 | 21.750 | 0.0001239386295899     |
| 6 | 3 | 22.000 | 0.0000866157328563     |
| 6 | 3 | 22.250 | 0.0000621456115972     |
| 6 | 3 | 22.500 | 0.0000511937651930     |
| 6 | 3 | 22.750 | 0.0000520289809140     |

|   |   |        |                        |
|---|---|--------|------------------------|
| 6 | 3 | 23.000 | 0.0000628662784139     |
| 6 | 3 | 23.250 | 0.0000812185549426     |
| 6 | 3 | 23.500 | 0.0001017949242579     |
| 6 | 3 | 23.750 | 0.0001186199600826     |
| 6 | 3 | 24.000 | 0.0001256830836260     |
| 6 | 3 | 24.250 | 0.0001192877337243     |
| 6 | 3 | 24.500 | 0.0001052349933311     |
| 6 | 3 | 24.750 | 0.0000917313874818     |
| 6 | 3 | 25.000 | 0.0000870169464934     |
| 6 | 3 | 25.250 | 0.0000963234198825     |
| 6 | 3 | 25.500 | 0.0001129755494391     |
| 6 | 3 | 25.750 | 0.0001273818415596     |
| 6 | 3 | 26.000 | 0.0001300545308566     |
| 6 | 3 | 26.250 | 0.0001147397241428     |
| 6 | 3 | 26.500 | 0.0000880929763618     |
| 6 | 3 | 26.750 | 0.0000600573557770     |
| 6 | 3 | 27.000 | 0.0000407893304287     |
| 6 | 3 | 27.250 | 0.0000374301666518     |
| 6 | 3 | 27.500 | 0.0000446973813045     |
| 6 | 3 | 27.750 | 0.0000542515675460     |
| 6 | 3 | 28.000 | 0.0000580285454158     |
| 6 | 3 | 28.250 | 0.0000508276630175     |
| 6 | 3 | 28.500 | 0.0000374014775460     |
| 6 | 3 | 28.750 | 0.0000247657759308     |
| 6 | 3 | 29.000 | 0.0000197921283731     |
| 6 | 3 | 29.250 | 0.0000269289396367     |
| 6 | 3 | 29.500 | 0.0000411064159163     |
| 6 | 3 | 29.750 | 0.0000549571913276     |
| 6 | 3 | 30.000 | 0.0000611923472324     |
| 6 | 6 | 4.000  | 12528.6301266360169393 |
| 6 | 6 | 4.250  | 5861.8085092503351916  |
| 6 | 6 | 4.500  | 2925.4624631971564668  |
| 6 | 6 | 4.750  | 1594.8725994715714478  |
| 6 | 6 | 5.000  | 943.1119445214826555   |
| 6 | 6 | 5.250  | 588.8961198345850789   |
| 6 | 6 | 5.500  | 378.0468350356632072   |
| 6 | 6 | 5.750  | 245.0252653474653926   |
| 6 | 6 | 6.000  | 158.7290034242496404   |
| 6 | 6 | 6.250  | 102.2513095965343837   |
| 6 | 6 | 6.500  | 65.3295840529601719    |
| 6 | 6 | 6.750  | 41.3421910863950757    |
| 6 | 6 | 7.000  | 25.8897735924002603    |
| 6 | 6 | 7.250  | 16.0183254650941507    |
| 6 | 6 | 7.500  | 9.7704349477937722     |
| 6 | 6 | 7.750  | 5.8615111259774793     |
| 6 | 6 | 8.000  | 3.4440451790033038     |
| 6 | 6 | 8.250  | 1.9724975837052270     |
| 6 | 6 | 8.500  | 1.0929283771728571     |
| 6 | 6 | 8.750  | 0.5807965167296807     |
| 6 | 6 | 9.000  | 0.2866480772972295     |
| 6 | 6 | 9.250  | 0.1250745375033127     |
| 6 | 6 | 9.500  | 0.0407488149705628     |
| 6 | 6 | 9.750  | -0.0102496857615240    |
| 6 | 6 | 10.000 | -0.0309693417578618    |
| 6 | 6 | 10.250 | -0.0396236155411298    |
| 6 | 6 | 10.500 | -0.0412845467145928    |
| 6 | 6 | 10.750 | -0.0353345921465005    |
| 6 | 6 | 11.000 | -0.0372898854095816    |
| 6 | 6 | 11.250 | -0.0258459248216667    |
| 6 | 6 | 11.500 | -0.0288103429962723    |
| 6 | 6 | 11.750 | -0.0341722396773152    |
| 6 | 6 | 12.000 | -0.0203941257425408    |
| 6 | 6 | 12.250 | -0.0096485358862926    |
| 6 | 6 | 12.500 | -0.0064066260981086    |
| 6 | 6 | 12.750 | -0.0073650771084668    |
| 6 | 6 | 13.000 | -0.0092224093235393    |
| 6 | 6 | 13.250 | -0.0093647821761986    |
| 6 | 6 | 13.500 | -0.0079329392154195    |
| 6 | 6 | 13.750 | -0.0057569597171858    |
| 6 | 6 | 14.000 | -0.0036671406715847    |
| 6 | 6 | 14.250 | -0.0023136658346243    |
| 6 | 6 | 14.500 | -0.0016267621605464    |
| 6 | 6 | 14.750 | -0.0013567209457900    |
| 6 | 6 | 15.000 | -0.0012538519470828    |
| 6 | 6 | 15.250 | -0.0011163898553713    |
| 6 | 6 | 15.500 | -0.0009342128014007    |
| 6 | 6 | 15.750 | -0.0007450998974222    |
| 6 | 6 | 16.000 | -0.0005867705801443    |
| 6 | 6 | 16.250 | -0.0004866940137523    |
| 6 | 6 | 16.500 | -0.0004315695319522    |
| 6 | 6 | 16.750 | -0.0003979311855397    |
| 6 | 6 | 17.000 | -0.0003622973242458    |
| 6 | 6 | 17.250 | -0.0003047707578614    |
| 6 | 6 | 17.500 | -0.0002198745592369    |
| 6 | 6 | 17.750 | -0.0001057558208973    |
| 6 | 6 | 18.000 | 0.0000394516869328     |
| 6 | 6 | 18.250 | 0.0002107152130201     |
| 6 | 6 | 18.500 | 0.0003753753547771     |
| 6 | 6 | 18.750 | 0.0004938678336915     |
| 6 | 6 | 19.000 | 0.0005266450687763     |
| 6 | 6 | 19.250 | 0.0004495383980516     |
| 6 | 6 | 19.500 | 0.0002998125099139     |
| 6 | 6 | 19.750 | 0.0001300805466176     |
| 6 | 6 | 20.000 | -0.0000070133924634    |
| 6 | 6 | 20.250 | -0.0000718874883142    |

|   |   |        |                        |
|---|---|--------|------------------------|
| 6 | 6 | 20.500 | -0.0000772944250187    |
| 6 | 6 | 20.750 | -0.0000490926497700    |
| 6 | 6 | 21.000 | -0.0000131644655052    |
| 6 | 6 | 21.250 | 0.0000094303292303     |
| 6 | 6 | 21.500 | 0.0000169218029694     |
| 6 | 6 | 21.750 | 0.0000123678097945     |
| 6 | 6 | 22.000 | -0.0000011872952889    |
| 6 | 6 | 22.250 | -0.0000202869344556    |
| 6 | 6 | 22.500 | -0.0000397800686207    |
| 6 | 6 | 22.750 | -0.0000540534541144    |
| 6 | 6 | 23.000 | -0.0000574680418388    |
| 6 | 6 | 23.250 | -0.0000466463714989    |
| 6 | 6 | 23.500 | -0.0000273782921951    |
| 6 | 6 | 23.750 | -0.0000077649472301    |
| 6 | 6 | 24.000 | 0.0000041198337710     |
| 6 | 6 | 24.250 | 0.0000027495885023     |
| 6 | 6 | 24.500 | -0.0000073743440637    |
| 6 | 6 | 24.750 | -0.0000192690818386    |
| 6 | 6 | 25.000 | -0.0000260030885379    |
| 6 | 6 | 25.250 | -0.0000226476429979    |
| 6 | 6 | 25.500 | -0.0000122068450271    |
| 6 | 6 | 25.750 | 0.0000003410062866     |
| 6 | 6 | 26.000 | 0.0000100004988566     |
| 6 | 6 | 26.250 | 0.0000133343010928     |
| 6 | 6 | 26.500 | 0.0000133039458532     |
| 6 | 6 | 26.750 | 0.0000144981856476     |
| 6 | 6 | 27.000 | 0.0000215539856427     |
| 6 | 6 | 27.250 | 0.0000371685496902     |
| 6 | 6 | 27.500 | 0.0000562792422345     |
| 6 | 6 | 27.750 | 0.0000718892959256     |
| 6 | 6 | 28.000 | 0.0000770573080970     |
| 6 | 6 | 28.250 | 0.0000674021030823     |
| 6 | 6 | 28.500 | 0.0000485914363264     |
| 6 | 6 | 28.750 | 0.0000287565849359     |
| 6 | 6 | 29.000 | 0.0000160266782741     |
| 6 | 6 | 29.250 | 0.0000160665581960     |
| 6 | 6 | 29.500 | 0.0000245938992141     |
| 6 | 6 | 29.750 | 0.0000347845636594     |
| 6 | 6 | 30.000 | 0.0000397262041682     |
| 7 | 0 | 4.000  | -6491.9470640992130939 |
| 7 | 0 | 4.250  | -2885.0205558719421788 |
| 7 | 0 | 4.500  | -1352.4979260548243474 |
| 7 | 0 | 4.750  | -694.4681540265955846  |
| 7 | 0 | 5.000  | -393.3484847323443887  |
| 7 | 0 | 5.250  | -239.9875225554574172  |
| 7 | 0 | 5.500  | -152.7517962774417697  |
| 7 | 0 | 5.750  | -98.9766571731873483   |
| 7 | 0 | 6.000  | -64.3611554550812031   |
| 7 | 0 | 6.250  | -41.6883867728370561   |
| 7 | 0 | 6.500  | -26.7912228437236166   |
| 7 | 0 | 6.750  | -17.0563618071928715   |
| 7 | 0 | 7.000  | -10.7380269015706453   |
| 7 | 0 | 7.250  | -6.6749295065404226    |
| 7 | 0 | 7.500  | -4.0889125489359426    |
| 7 | 0 | 7.750  | -2.4655154177284375    |
| 7 | 0 | 8.000  | -1.4580799047882216    |
| 7 | 0 | 8.250  | -0.8449657099489480    |
| 7 | 0 | 8.500  | -0.4788327892546109    |
| 7 | 0 | 8.750  | -0.2654029835553787    |
| 7 | 0 | 9.000  | -0.1459499438157380    |
| 7 | 0 | 9.250  | -0.0774092286464690    |
| 7 | 0 | 9.500  | -0.0408789423702097    |
| 7 | 0 | 9.750  | -0.0179669257618186    |
| 7 | 0 | 10.000 | -0.0069060594769791    |
| 7 | 0 | 10.250 | -0.0004791051469567    |
| 7 | 0 | 10.500 | 0.0029732922224353     |
| 7 | 0 | 10.750 | 0.0064549252756605     |
| 7 | 0 | 11.000 | -0.0053471549571071    |
| 7 | 0 | 11.250 | 0.0010744929906233     |
| 7 | 0 | 11.500 | 0.0072406888702916     |
| 7 | 0 | 11.750 | 0.0052948665566092     |
| 7 | 0 | 12.000 | 0.0054767977927476     |
| 7 | 0 | 12.250 | 0.0056330902093134     |
| 7 | 0 | 12.500 | 0.0048246764225204     |
| 7 | 0 | 12.750 | 0.0035269312872545     |
| 7 | 0 | 13.000 | 0.0022151479749048     |
| 7 | 0 | 13.250 | 0.0012798388822636     |
| 7 | 0 | 13.500 | 0.0007711932740152     |
| 7 | 0 | 13.750 | 0.0006541330081132     |
| 7 | 0 | 14.000 | 0.0008935498717796     |
| 7 | 0 | 14.250 | 0.0014232301628639     |
| 7 | 0 | 14.500 | 0.0020523005303215     |
| 7 | 0 | 14.750 | 0.0025586632262838     |
| 7 | 0 | 15.000 | 0.0027201223777029     |
| 7 | 0 | 15.250 | 0.0023903680933345     |
| 7 | 0 | 15.500 | 0.0017267595813719     |
| 7 | 0 | 15.750 | 0.0009625229523686     |
| 7 | 0 | 16.000 | 0.0003306598149885     |
| 7 | 0 | 16.250 | 0.0000053459147516     |
| 7 | 0 | 16.500 | -0.0000734404925020    |
| 7 | 0 | 16.750 | -0.0000241244646431    |
| 7 | 0 | 17.000 | 0.0000349354066439     |
| 7 | 0 | 17.250 | 0.0000144204863105     |
| 7 | 0 | 17.500 | -0.0000587871743405    |

|   |   |        |                        |
|---|---|--------|------------------------|
| 7 | 0 | 17.750 | -0.0001287431347508    |
| 7 | 0 | 18.000 | -0.0001394835731241    |
| 7 | 0 | 18.250 | -0.0000538848957852    |
| 7 | 0 | 18.500 | 0.0000897310807079     |
| 7 | 0 | 18.750 | 0.0002341607411182     |
| 7 | 0 | 19.000 | 0.0003221981251431     |
| 7 | 0 | 19.250 | 0.0003125970071589     |
| 7 | 0 | 19.500 | 0.0002279474431291     |
| 7 | 0 | 19.750 | 0.0001067800042433     |
| 7 | 0 | 20.000 | -0.0000124104559665    |
| 7 | 0 | 20.250 | -0.0000979008979455    |
| 7 | 0 | 20.500 | -0.0001449539844577    |
| 7 | 0 | 20.750 | -0.0001555632856534    |
| 7 | 0 | 21.000 | -0.0001317338817432    |
| 7 | 0 | 21.250 | -0.0000780360688176    |
| 7 | 0 | 21.500 | -0.0000091728712535    |
| 7 | 0 | 21.750 | 0.0000576592801867     |
| 7 | 0 | 22.000 | 0.0001053016896722     |
| 7 | 0 | 22.250 | 0.0001214272002291     |
| 7 | 0 | 22.500 | 0.0001129171637951     |
| 7 | 0 | 22.750 | 0.0000914674260265     |
| 7 | 0 | 23.000 | 0.0000688078631688     |
| 7 | 0 | 23.250 | 0.0000541379287888     |
| 7 | 0 | 23.500 | 0.0000464412599530     |
| 7 | 0 | 23.750 | 0.0000421222784470     |
| 7 | 0 | 24.000 | 0.0000376164632068     |
| 7 | 0 | 24.250 | 0.0000310874364024     |
| 7 | 0 | 24.500 | 0.0000275187214186     |
| 7 | 0 | 24.750 | 0.0000335969757174     |
| 7 | 0 | 25.000 | 0.0000560405432656     |
| 7 | 0 | 25.250 | 0.0000971638026556     |
| 7 | 0 | 25.500 | 0.0001414065821373     |
| 7 | 0 | 25.750 | 0.0001686669890776     |
| 7 | 0 | 26.000 | 0.0001587454641125     |
| 7 | 0 | 26.250 | 0.0000999840479713     |
| 7 | 0 | 26.500 | 0.0000150684344919     |
| 7 | 0 | 26.750 | -0.0000647263836359    |
| 7 | 0 | 27.000 | -0.0001081821201132    |
| 7 | 0 | 27.250 | -0.0000937966278596    |
| 7 | 0 | 27.500 | -0.0000387293906911    |
| 7 | 0 | 27.750 | 0.0000301521145576     |
| 7 | 0 | 28.000 | 0.0000858874534196     |
| 7 | 0 | 28.250 | 0.0001078674034661     |
| 7 | 0 | 28.500 | 0.0001013096009077     |
| 7 | 0 | 28.750 | 0.0000779328993878     |
| 7 | 0 | 29.000 | 0.0000494487864071     |
| 7 | 0 | 29.250 | 0.0000256025067838     |
| 7 | 0 | 29.500 | 0.0000084419677572     |
| 7 | 0 | 29.750 | -0.0000019106937013    |
| 7 | 0 | 30.000 | -0.0000053720940754    |
| 7 | 3 | 4.000  | 17329.9543411202394054 |
| 7 | 3 | 4.250  | 7871.6266296806679748  |
| 7 | 3 | 4.500  | 3787.6661355748992719  |
| 7 | 3 | 4.750  | 1991.9801226040890469  |
| 7 | 3 | 5.000  | 1145.2511657601235129  |
| 7 | 3 | 5.250  | 701.9913902256633946   |
| 7 | 3 | 5.500  | 445.6847261007306997   |
| 7 | 3 | 5.750  | 286.9590714595079248   |
| 7 | 3 | 6.000  | 185.0988610046311749   |
| 7 | 3 | 6.250  | 118.8602765149557285   |
| 7 | 3 | 6.500  | 75.7137951877895716    |
| 7 | 3 | 6.750  | 47.7619457600438295    |
| 7 | 3 | 7.000  | 29.7978921941356134    |
| 7 | 3 | 7.250  | 18.3630280691657077    |
| 7 | 3 | 7.500  | 11.1524289009249600    |
| 7 | 3 | 7.750  | 6.6648694035060458     |
| 7 | 3 | 8.000  | 3.9110273988505924     |
| 7 | 3 | 8.250  | 2.2458880893467361     |
| 7 | 3 | 8.500  | 1.2568409369918336     |
| 7 | 3 | 8.750  | 0.6810473292303227     |
| 7 | 3 | 9.000  | 0.3567369254686051     |
| 7 | 3 | 9.250  | 0.1745764434210374     |
| 7 | 3 | 9.500  | 0.0675300305779774     |
| 7 | 3 | 9.750  | 0.0124231970201775     |
| 7 | 3 | 10.000 | -0.0135374086090537    |
| 7 | 3 | 10.250 | -0.0259711557456486    |
| 7 | 3 | 10.500 | -0.0299706691364118    |
| 7 | 3 | 10.750 | -0.0221249173985201    |
| 7 | 3 | 11.000 | -0.0210939642518512    |
| 7 | 3 | 11.250 | -0.0131488230346539    |
| 7 | 3 | 11.500 | -0.0189592881580261    |
| 7 | 3 | 11.750 | -0.0274111390804480    |
| 7 | 3 | 12.000 | -0.0155013596623703    |
| 7 | 3 | 12.250 | -0.0058491453471895    |
| 7 | 3 | 12.500 | -0.0033240115948194    |
| 7 | 3 | 12.750 | -0.0047679458692046    |
| 7 | 3 | 13.000 | -0.0070262986501085    |
| 7 | 3 | 13.250 | -0.0075922392768814    |
| 7 | 3 | 13.500 | -0.0065505150152817    |
| 7 | 3 | 13.750 | -0.0046341185723155    |
| 7 | 3 | 14.000 | -0.0025758678666583    |
| 7 | 3 | 14.250 | -0.0009764609179375    |
| 7 | 3 | 14.500 | 0.0000900655583309     |
| 7 | 3 | 14.750 | 0.0006810730391541     |
| 7 | 3 | 15.000 | 0.0008537473702780     |



|   |   |        |                         |
|---|---|--------|-------------------------|
| 7 | 3 | 15.250 | 0.0006839720905012      |
| 7 | 3 | 15.500 | 0.0003226240218367      |
| 7 | 3 | 15.750 | -0.0000607014757478     |
| 7 | 3 | 16.000 | -0.0002966096868953     |
| 7 | 3 | 16.250 | -0.0002626552775549     |
| 7 | 3 | 16.500 | -0.0000232426540363     |
| 7 | 3 | 16.750 | 0.0003106472553933      |
| 7 | 3 | 17.000 | 0.0006280897202836      |
| 7 | 3 | 17.250 | 0.0008354675003191      |
| 7 | 3 | 17.500 | 0.0009085313187800      |
| 7 | 3 | 17.750 | 0.0008403637377457      |
| 7 | 3 | 18.000 | 0.0006240603536193      |
| 7 | 3 | 18.250 | 0.0002737885708744      |
| 7 | 3 | 18.500 | -0.000118741750652      |
| 7 | 3 | 18.750 | -0.0004132437769851     |
| 7 | 3 | 19.000 | -0.0005106463175662     |
| 7 | 3 | 19.250 | -0.0003299526585538     |
| 7 | 3 | 19.500 | 0.0000207314303389      |
| 7 | 3 | 19.750 | 0.0003877356336698      |
| 7 | 3 | 20.000 | 0.0006174164865266      |
| 7 | 3 | 20.250 | 0.0006004122860659      |
| 7 | 3 | 20.500 | 0.0004046091566472      |
| 7 | 3 | 20.750 | 0.0001421782316381      |
| 7 | 3 | 21.000 | -0.0000746875591612     |
| 7 | 3 | 21.250 | -0.0001612047248469     |
| 7 | 3 | 21.500 | -0.0001422030205666     |
| 7 | 3 | 21.750 | -0.0000699605384983     |
| 7 | 3 | 22.000 | 0.0000032510773441      |
| 7 | 3 | 22.250 | 0.0000369111854229      |
| 7 | 3 | 22.500 | 0.0000375759139860      |
| 7 | 3 | 22.750 | 0.0000235626976497      |
| 7 | 3 | 23.000 | 0.0000131541673910      |
| 7 | 3 | 23.250 | 0.0000204310081596      |
| 7 | 3 | 23.500 | 0.0000426787504679      |
| 7 | 3 | 23.750 | 0.0000729483606852      |
| 7 | 3 | 24.000 | 0.0001042219519618      |
| 7 | 3 | 24.250 | 0.0001301118028849      |
| 7 | 3 | 24.500 | 0.0001469408873336      |
| 7 | 3 | 24.750 | 0.0001516542086446      |
| 7 | 3 | 25.000 | 0.0001410788727938      |
| 7 | 3 | 25.250 | 0.0001138179650386      |
| 7 | 3 | 25.500 | 0.0000760120025148      |
| 7 | 3 | 25.750 | 0.0000357087763680      |
| 7 | 3 | 26.000 | 0.0000008948256935      |
| 7 | 3 | 26.250 | -0.0000219300093465     |
| 7 | 3 | 26.500 | -0.0000316811188879     |
| 7 | 3 | 26.750 | -0.0000285933301956     |
| 7 | 3 | 27.000 | -0.0000128016737630     |
| 7 | 3 | 27.250 | 0.0000147033822172      |
| 7 | 3 | 27.500 | 0.0000492333678103      |
| 7 | 3 | 27.750 | 0.0000850729621380      |
| 7 | 3 | 28.000 | 0.0001163660330997      |
| 7 | 3 | 28.250 | 0.0001379663573714      |
| 7 | 3 | 28.500 | 0.0001479560530759      |
| 7 | 3 | 28.750 | 0.0001452715898657      |
| 7 | 3 | 29.000 | 0.0001288151793030      |
| 7 | 3 | 29.250 | 0.0000994056913277      |
| 7 | 3 | 29.500 | 0.0000655636781498      |
| 7 | 3 | 29.750 | 0.0000376996610673      |
| 7 | 3 | 30.000 | 0.0000261279696411      |
| 7 | 6 | 4.000  | -21974.0291404139097722 |
| 7 | 6 | 4.250  | -9800.4386838677528431  |
| 7 | 6 | 4.500  | -4601.3439427629018610  |
| 7 | 6 | 4.750  | -2358.0525331612843729  |
| 7 | 6 | 5.000  | -1327.6628917009065844  |
| 7 | 6 | 5.250  | -802.9243327889184911   |
| 7 | 6 | 5.500  | -506.0155532985188529   |
| 7 | 6 | 5.750  | -324.6724102179500733   |
| 7 | 6 | 6.000  | -209.1344119869637552   |
| 7 | 6 | 6.250  | -134.2564464343272448   |
| 7 | 6 | 6.500  | -85.5717902960848278    |
| 7 | 6 | 6.750  | -54.0481887204360305    |
| 7 | 6 | 7.000  | -33.7827259541856293    |
| 7 | 6 | 7.250  | -20.8664448903087845    |
| 7 | 6 | 7.500  | -12.7100543136068822    |
| 7 | 6 | 7.750  | -7.6243149835395698     |
| 7 | 6 | 8.000  | -4.4903514459421032     |
| 7 | 6 | 8.250  | -2.5899201011742177     |
| 7 | 6 | 8.500  | -1.4588469068280880     |
| 7 | 6 | 8.750  | -0.7967711513098168     |
| 7 | 6 | 9.000  | -0.4240399937774364     |
| 7 | 6 | 9.250  | -0.2143256755486460     |
| 7 | 6 | 9.500  | -0.0912213408504696     |
| 7 | 6 | 9.750  | -0.0279133932951399     |
| 7 | 6 | 10.000 | 0.0017474730928884      |
| 7 | 6 | 10.250 | 0.0181791380454692      |
| 7 | 6 | 10.500 | 0.0233104011279133      |
| 7 | 6 | 10.750 | 0.0260121970908824      |
| 7 | 6 | 11.000 | 0.0015842670162107      |
| 7 | 6 | 11.250 | 0.0083939258408117      |
| 7 | 6 | 11.500 | 0.0180737546223313      |
| 7 | 6 | 11.750 | 0.0409857443568660      |
| 7 | 6 | 12.000 | 0.0139704848299032      |
| 7 | 6 | 12.250 | -0.0074087827370947     |
| 7 | 6 | 12.500 | -0.0100330392419787     |

|   |   |        |                        |
|---|---|--------|------------------------|
| 7 | 6 | 12.750 | -0.0024397157363934    |
| 7 | 6 | 13.000 | 0.0068376270137430     |
| 7 | 6 | 13.250 | 0.0110294852338857     |
| 7 | 6 | 13.500 | 0.0104348185767718     |
| 7 | 6 | 13.750 | 0.0071215671687526     |
| 7 | 6 | 14.000 | 0.0031583990192472     |
| 7 | 6 | 14.250 | 0.0002320008857540     |
| 7 | 6 | 14.500 | -0.0014982300169615    |
| 7 | 6 | 14.750 | -0.0022546684157030    |
| 7 | 6 | 15.000 | -0.0022598010947535    |
| 7 | 6 | 15.250 | -0.0017399539566938    |
| 7 | 6 | 15.500 | -0.0009366591846665    |
| 7 | 6 | 15.750 | -0.0000952854544568    |
| 7 | 6 | 16.000 | 0.0005384628708111     |
| 7 | 6 | 16.250 | 0.0007855698115584     |
| 7 | 6 | 16.500 | 0.0007355159402833     |
| 7 | 6 | 16.750 | 0.0005450854855425     |
| 7 | 6 | 17.000 | 0.0003710294125342     |
| 7 | 6 | 17.250 | 0.0003297413802828     |
| 7 | 6 | 17.500 | 0.0003765092453474     |
| 7 | 6 | 17.750 | 0.0004264203865178     |
| 7 | 6 | 18.000 | 0.0003945179009930     |
| 7 | 6 | 18.250 | 0.0002235398577681     |
| 7 | 6 | 18.500 | -0.0000328902497690    |
| 7 | 6 | 18.750 | -0.0002934370720473    |
| 7 | 6 | 19.000 | -0.0004768323315332    |
| 7 | 6 | 19.250 | -0.0005233252420086    |
| 7 | 6 | 19.500 | -0.0004589327713677    |
| 7 | 6 | 19.750 | -0.0003310841586487    |
| 7 | 6 | 20.000 | -0.0001872290412259    |
| 7 | 6 | 20.250 | -0.0000666176858284    |
| 7 | 6 | 20.500 | 0.0000245610651297     |
| 7 | 6 | 20.750 | 0.0000884572999056     |
| 7 | 6 | 21.000 | 0.0001272751732079     |
| 7 | 6 | 21.250 | 0.0001438082460400     |
| 7 | 6 | 21.500 | 0.0001430542809407     |
| 7 | 6 | 21.750 | 0.0001305704040443     |
| 7 | 6 | 22.000 | 0.0001120003860113     |
| 7 | 6 | 22.250 | 0.0000925467526497     |
| 7 | 6 | 22.500 | 0.0000752890782674     |
| 7 | 6 | 22.750 | 0.0000627420311546     |
| 7 | 6 | 23.000 | 0.0000574655253196     |
| 7 | 6 | 23.250 | 0.0000607812782381     |
| 7 | 6 | 23.500 | 0.0000689813786498     |
| 7 | 6 | 23.750 | 0.0000770296415833     |
| 7 | 6 | 24.000 | 0.0000798257935645     |
| 7 | 6 | 24.250 | 0.0000736771267995     |
| 7 | 6 | 24.500 | 0.0000605443241234     |
| 7 | 6 | 24.750 | 0.0000438266244018     |
| 7 | 6 | 25.000 | 0.0000269045731022     |
| 7 | 6 | 25.250 | 0.000012732236045      |
| 7 | 6 | 25.500 | 0.0000026168810837     |
| 7 | 6 | 25.750 | -0.0000024602470488    |
| 7 | 6 | 26.000 | -0.0000015237154531    |
| 7 | 6 | 26.250 | 0.0000058064218169     |
| 7 | 6 | 26.500 | 0.0000175526843860     |
| 7 | 6 | 26.750 | 0.0000311726681977     |
| 7 | 6 | 27.000 | 0.0000441797272036     |
| 7 | 6 | 27.250 | 0.0000541851930083     |
| 7 | 6 | 27.500 | 0.0000588727625071     |
| 7 | 6 | 27.750 | 0.0000559505446268     |
| 7 | 6 | 28.000 | 0.0000432293421193     |
| 7 | 6 | 28.250 | 0.0000207797141350     |
| 7 | 6 | 28.500 | -0.0000027708803593    |
| 7 | 6 | 28.750 | -0.0000167709341712    |
| 7 | 6 | 29.000 | -0.0000106353545867    |
| 7 | 6 | 29.250 | 0.0000215797914531     |
| 7 | 6 | 29.500 | 0.0000669032918067     |
| 7 | 6 | 29.750 | 0.0001074817844277     |
| 7 | 6 | 30.000 | 0.0001250980004352     |
| 8 | 0 | 4.000  | -1037.1302178280529915 |
| 8 | 0 | 4.250  | -451.1357889587397949  |
| 8 | 0 | 4.500  | -207.2495095478843723  |
| 8 | 0 | 4.750  | -103.8303550511263893  |
| 8 | 0 | 5.000  | -56.7736675641294823   |
| 8 | 0 | 5.250  | -33.0743209700353873   |
| 8 | 0 | 5.500  | -19.9691104038768117   |
| 8 | 0 | 5.750  | -12.2474898269045980   |
| 8 | 0 | 6.000  | -7.5224459307014513    |
| 8 | 0 | 6.250  | -4.5865410752082880    |
| 8 | 0 | 6.500  | -2.7501597338355452    |
| 8 | 0 | 6.750  | -1.6186234465206439    |
| 8 | 0 | 7.000  | -0.9289512970976865    |
| 8 | 0 | 7.250  | -0.5109519375630533    |
| 8 | 0 | 7.500  | -0.2658773084254875    |
| 8 | 0 | 7.750  | -0.1284567546451640    |
| 8 | 0 | 8.000  | -0.0501186060441370    |
| 8 | 0 | 8.250  | -0.0081817978013419    |
| 8 | 0 | 8.500  | 0.0121802500427748     |
| 8 | 0 | 8.750  | 0.0181495948681913     |
| 8 | 0 | 9.000  | 0.0191965949858393     |
| 8 | 0 | 9.250  | 0.0189863349886217     |
| 8 | 0 | 9.500  | 0.0154420132145781     |
| 8 | 0 | 9.750  | 0.0110935097700278     |
| 8 | 0 | 10.000 | 0.0088463627473079     |

|   |   |        |                        |
|---|---|--------|------------------------|
| 8 | 0 | 10.250 | 0.0063098351361734     |
| 8 | 0 | 10.500 | 0.0044871884672411     |
| 8 | 0 | 10.750 | -0.0028137749097699    |
| 8 | 0 | 11.000 | -0.0007641603423059    |
| 8 | 0 | 11.250 | -0.0020870449320860    |
| 8 | 0 | 11.500 | 0.0066354912981588     |
| 8 | 0 | 11.750 | 0.0015421610685689     |
| 8 | 0 | 12.000 | 0.0000026444852352     |
| 8 | 0 | 12.250 | 0.0003201680823475     |
| 8 | 0 | 12.500 | 0.0003297828771913     |
| 8 | 0 | 12.750 | 0.0001503669958103     |
| 8 | 0 | 13.000 | -0.0000973521769905    |
| 8 | 0 | 13.250 | -0.0003094447899938    |
| 8 | 0 | 13.500 | -0.0004410475108534    |
| 8 | 0 | 13.750 | -0.0004609315611492    |
| 8 | 0 | 14.000 | -0.0003375997916009    |
| 8 | 0 | 14.250 | -0.0000637031676030    |
| 8 | 0 | 14.500 | 0.0002725339037246     |
| 8 | 0 | 14.750 | 0.0005591204786199     |
| 8 | 0 | 15.000 | 0.0006839843902355     |
| 8 | 0 | 15.250 | 0.0005731627502067     |
| 8 | 0 | 15.500 | 0.0003056912892792     |
| 8 | 0 | 15.750 | -0.0000010831201195    |
| 8 | 0 | 16.000 | -0.0002298606490670    |
| 8 | 0 | 16.250 | -0.0002962045663361    |
| 8 | 0 | 16.500 | -0.0002467405967042    |
| 8 | 0 | 16.750 | -0.0001608114939989    |
| 8 | 0 | 17.000 | -0.0001177449222919    |
| 8 | 0 | 17.250 | -0.0001729445882547    |
| 8 | 0 | 17.500 | -0.0002860266233755    |
| 8 | 0 | 17.750 | -0.0003926475835887    |
| 8 | 0 | 18.000 | -0.0004284586613513    |
| 8 | 0 | 18.250 | -0.0003512998913094    |
| 8 | 0 | 18.500 | -0.0002077103339246    |
| 8 | 0 | 18.750 | -0.0000664054201761    |
| 8 | 0 | 19.000 | 0.0000039070672925     |
| 8 | 0 | 19.250 | -0.0000435120692260    |
| 8 | 0 | 19.500 | -0.0001676467107159    |
| 8 | 0 | 19.750 | -0.0003055483089856    |
| 8 | 0 | 20.000 | -0.0003942861328337    |
| 8 | 0 | 20.250 | -0.0003887297489778    |
| 8 | 0 | 20.500 | -0.0003149382116908    |
| 8 | 0 | 20.750 | -0.0002167771018323    |
| 8 | 0 | 21.000 | -0.0001381286990232    |
| 8 | 0 | 21.250 | -0.0001124060959179    |
| 8 | 0 | 21.500 | -0.0001310248580791    |
| 8 | 0 | 21.750 | -0.0001748716784047    |
| 8 | 0 | 22.000 | -0.0002248010351020    |
| 8 | 0 | 22.250 | -0.0002648063128519    |
| 8 | 0 | 22.500 | -0.0002914229235012    |
| 8 | 0 | 22.750 | -0.0003043037722900    |
| 8 | 0 | 23.000 | -0.0003030313116726    |
| 8 | 0 | 23.250 | -0.0002879915218659    |
| 8 | 0 | 23.500 | -0.0002629054650779    |
| 8 | 0 | 23.750 | -0.0002323429153858    |
| 8 | 0 | 24.000 | -0.0002008462832112    |
| 8 | 0 | 24.250 | -0.0001731500438196    |
| 8 | 0 | 24.500 | -0.0001549464116736    |
| 8 | 0 | 24.750 | -0.0001521694734459    |
| 8 | 0 | 25.000 | -0.0001707067928865    |
| 8 | 0 | 25.250 | -0.0002120843297414    |
| 8 | 0 | 25.500 | -0.0002604628511286    |
| 8 | 0 | 25.750 | -0.0002956652699170    |
| 8 | 0 | 26.000 | -0.0002974971506702    |
| 8 | 0 | 26.250 | -0.0002540439080418    |
| 8 | 0 | 26.500 | -0.0001866174725491    |
| 8 | 0 | 26.750 | -0.0001248354057445    |
| 8 | 0 | 27.000 | -0.0000982923140367    |
| 8 | 0 | 27.250 | -0.0001267058362684    |
| 8 | 0 | 27.500 | -0.0001904808456659    |
| 8 | 0 | 27.750 | -0.0002602428479497    |
| 8 | 0 | 28.000 | -0.0003066792403490    |
| 8 | 0 | 28.250 | -0.0003087525298260    |
| 8 | 0 | 28.500 | -0.0002786763443826    |
| 8 | 0 | 28.750 | -0.0002370956038397    |
| 8 | 0 | 29.000 | -0.0002048538793000    |
| 8 | 0 | 29.250 | -0.0001972996612115    |
| 8 | 0 | 29.500 | -0.0002073838902305    |
| 8 | 0 | 29.750 | -0.0002224891915704    |
| 8 | 0 | 30.000 | -0.0002302406401847    |
| 8 | 3 | 4.000  | -9297.5591049749109516 |
| 8 | 3 | 4.250  | -4010.1127201506715210 |
| 8 | 3 | 4.500  | -1790.7450883651697495 |
| 8 | 3 | 4.750  | -864.9198019995701543  |
| 8 | 3 | 5.000  | -461.6664100830081452  |
| 8 | 3 | 5.250  | -268.9816695260511779  |
| 8 | 3 | 5.500  | -165.9711249708201990  |
| 8 | 3 | 5.750  | -105.4557485946542670  |
| 8 | 3 | 6.000  | -67.7213481751338691   |
| 8 | 3 | 6.250  | -43.4981206219900969   |
| 8 | 3 | 6.500  | -27.8305190179306550   |
| 8 | 3 | 6.750  | -17.6747958425009912   |
| 8 | 3 | 7.000  | -11.1357105753095311   |
| 8 | 3 | 7.250  | -6.9541037954451710    |
| 8 | 3 | 7.500  | -4.2936730554818396    |

|   |   |        |                        |
|---|---|--------|------------------------|
| 8 | 3 | 7.750  | -2.6149655787338979    |
| 8 | 3 | 8.000  | -1.5649434164268383    |
| 8 | 3 | 8.250  | -0.9162491541807882    |
| 8 | 3 | 8.500  | -0.5250636780369111    |
| 8 | 3 | 8.750  | -0.2962491880355237    |
| 8 | 3 | 9.000  | -0.1625672210703663    |
| 8 | 3 | 9.250  | -0.0902272441422912    |
| 8 | 3 | 9.500  | -0.0478965124534675    |
| 8 | 3 | 9.750  | -0.0203317558447371    |
| 8 | 3 | 10.000 | -0.0085594532317244    |
| 8 | 3 | 10.250 | -0.0016441422503538    |
| 8 | 3 | 10.500 | 0.0010289850084051     |
| 8 | 3 | 10.750 | 0.0003079688733253     |
| 8 | 3 | 11.000 | 0.0061732012874168     |
| 8 | 3 | 11.250 | -0.0089428604691441    |
| 8 | 3 | 11.500 | -0.0030861995042409    |
| 8 | 3 | 11.750 | 0.0097314388309655     |
| 8 | 3 | 12.000 | 0.0040470538128541     |
| 8 | 3 | 12.250 | -0.0014370902410158    |
| 8 | 3 | 12.500 | -0.0021252134062744    |
| 8 | 3 | 12.750 | -0.0001986486919288    |
| 8 | 3 | 13.000 | 0.0021608891673034     |
| 8 | 3 | 13.250 | 0.0032174141809071     |
| 8 | 3 | 13.500 | 0.0030072957962394     |
| 8 | 3 | 13.750 | 0.0020086043890820     |
| 8 | 3 | 14.000 | 0.0006987760857858     |
| 8 | 3 | 14.250 | -0.0005080339757600    |
| 8 | 3 | 14.500 | -0.0014504140397253    |
| 8 | 3 | 14.750 | -0.0020301074662122    |
| 8 | 3 | 15.000 | -0.0021488122345117    |
| 8 | 3 | 15.250 | -0.0017669553050961    |
| 8 | 3 | 15.500 | -0.0010799795117085    |
| 8 | 3 | 15.750 | -0.0003421039560452    |
| 8 | 3 | 16.000 | 0.0001924392657234     |
| 8 | 3 | 16.250 | 0.0003389396809949     |
| 8 | 3 | 16.500 | 0.0001905746353898     |
| 8 | 3 | 16.750 | -0.0000900490891681    |
| 8 | 3 | 17.000 | -0.0003403529543155    |
| 8 | 3 | 17.250 | -0.0004349892240897    |
| 8 | 3 | 17.500 | -0.0003973920724662    |
| 8 | 3 | 17.750 | -0.0002881565995701    |
| 8 | 3 | 18.000 | -0.0001678501881112    |
| 8 | 3 | 18.250 | -0.0000858145294378    |
| 8 | 3 | 18.500 | -0.0000465481540686    |
| 8 | 3 | 18.750 | -0.0000433850972292    |
| 8 | 3 | 19.000 | -0.0000696835922544    |
| 8 | 3 | 19.250 | -0.0001166300295911    |
| 8 | 3 | 19.500 | -0.0001665494422407    |
| 8 | 3 | 19.750 | -0.0001995353796361    |
| 8 | 3 | 20.000 | -0.0001956719284693    |
| 8 | 3 | 20.250 | -0.0001428753951430    |
| 8 | 3 | 20.500 | -0.0000604321600531    |
| 8 | 3 | 20.750 | 0.0000245420345467     |
| 8 | 3 | 21.000 | 0.0000849314008033     |
| 8 | 3 | 21.250 | 0.0000998500819751     |
| 8 | 3 | 21.500 | 0.0000733107043837     |
| 8 | 3 | 21.750 | 0.0000155840015104     |
| 8 | 3 | 22.000 | -0.0000630468467196    |
| 8 | 3 | 22.250 | -0.0001502622712083    |
| 8 | 3 | 22.500 | -0.0002255476941591    |
| 8 | 3 | 22.750 | -0.0002663273961021    |
| 8 | 3 | 23.000 | -0.0002499746868980    |
| 8 | 3 | 23.250 | -0.0001645471724810    |
| 8 | 3 | 23.500 | -0.0000412453023765    |
| 8 | 3 | 23.750 | 0.0000778847513900     |
| 8 | 3 | 24.000 | 0.0001507265574888     |
| 8 | 3 | 24.250 | 0.0001479321053148     |
| 8 | 3 | 24.500 | 0.0000914027227391     |
| 8 | 3 | 24.750 | 0.0000159255593395     |
| 8 | 3 | 25.000 | -0.0000436830080270    |
| 8 | 3 | 25.250 | -0.0000610756707067    |
| 8 | 3 | 25.500 | -0.0000438256309893    |
| 8 | 3 | 25.750 | -0.0000079421466885    |
| 8 | 3 | 26.000 | 0.0000306030090387     |
| 8 | 3 | 26.250 | 0.0000581568560033     |
| 8 | 3 | 26.500 | 0.0000703216633965     |
| 8 | 3 | 26.750 | 0.0000650656199874     |
| 8 | 3 | 27.000 | 0.0000405218730780     |
| 8 | 3 | 27.250 | -0.0000027106415881    |
| 8 | 3 | 27.500 | -0.0000546838868810    |
| 8 | 3 | 27.750 | -0.0001032138479568    |
| 8 | 3 | 28.000 | -0.0001360987171362    |
| 8 | 3 | 28.250 | -0.0001441747836208    |
| 8 | 3 | 28.500 | -0.0001312580950112    |
| 8 | 3 | 28.750 | -0.0001046174821290    |
| 8 | 3 | 29.000 | -0.0000718735753264    |
| 8 | 3 | 29.250 | -0.0000400674773300    |
| 8 | 3 | 29.500 | -0.0000132340235432    |
| 8 | 3 | 29.750 | 0.0000053887521270     |
| 8 | 3 | 30.000 | 0.0000123925738329     |
| 8 | 6 | 4.000  | 17771.1844427313662891 |
| 8 | 6 | 4.250  | 7645.5145768541460711  |
| 8 | 6 | 4.500  | 3397.1404054226204607  |
| 8 | 6 | 4.750  | 1629.6938106522757153  |
| 8 | 6 | 5.000  | 863.3132789494527515   |

|   |   |        |                      |
|---|---|--------|----------------------|
| 8 | 6 | 5.250  | 499.2811513596813029 |
| 8 | 6 | 5.500  | 306.0107119831832279 |
| 8 | 6 | 5.750  | 193.2536461049720060 |
| 8 | 6 | 6.000  | 123.4287682361498781 |
| 8 | 6 | 6.250  | 78.9079325719003180  |
| 8 | 6 | 6.500  | 50.2146650691867222  |
| 8 | 6 | 6.750  | 31.7079472802310534  |
| 8 | 6 | 7.000  | 19.8557623732939987  |
| 8 | 6 | 7.250  | 12.2974267882132722  |
| 8 | 6 | 7.500  | 7.5139007982900576   |
| 8 | 6 | 7.750  | 4.5196559239749590   |
| 8 | 6 | 8.000  | 2.6618672268761046   |
| 8 | 6 | 8.250  | 1.5295692300935286   |
| 8 | 6 | 8.500  | 0.8534111270428753   |
| 8 | 6 | 8.750  | 0.4676493907153514   |
| 8 | 6 | 9.000  | 0.2473893568194541   |
| 8 | 6 | 9.250  | 0.1248622177341332   |
| 8 | 6 | 9.500  | 0.0660088938874708   |
| 8 | 6 | 9.750  | 0.0261203173499496   |
| 8 | 6 | 10.000 | 0.0099598414508648   |
| 8 | 6 | 10.250 | -0.0000847350215949  |
| 8 | 6 | 10.500 | -0.0044849411043586  |
| 8 | 6 | 10.750 | -0.0035701519894502  |
| 8 | 6 | 11.000 | -0.0252154035599830  |
| 8 | 6 | 11.250 | 0.0108809870945450   |
| 8 | 6 | 11.500 | -0.0115255165669694  |
| 8 | 6 | 11.750 | -0.0378843901467292  |
| 8 | 6 | 12.000 | -0.0052703879605218  |
| 8 | 6 | 12.250 | 0.0182857496662425   |
| 8 | 6 | 12.500 | 0.0198067297518225   |
| 8 | 6 | 12.750 | 0.0094440739838966   |
| 8 | 6 | 13.000 | -0.0026494530287859  |
| 8 | 6 | 13.250 | -0.0084464540312243  |
| 8 | 6 | 13.500 | -0.0084546935421113  |
| 8 | 6 | 13.750 | -0.0053196329662617  |
| 8 | 6 | 14.000 | -0.0016891136080410  |
| 8 | 6 | 14.250 | 0.0003371702337507   |
| 8 | 6 | 14.500 | 0.0008562290715313   |
| 8 | 6 | 14.750 | 0.0005148613281332   |
| 8 | 6 | 15.000 | -0.0000393248884314  |
| 8 | 6 | 15.250 | -0.0002918394719922  |
| 8 | 6 | 15.500 | -0.0002624285042918  |
| 8 | 6 | 15.750 | -0.0001044524465366  |
| 8 | 6 | 16.000 | 0.0000295613112269   |
| 8 | 6 | 16.250 | 0.0000274014386576   |
| 8 | 6 | 16.500 | -0.0000663109802082  |
| 8 | 6 | 16.750 | -0.0001683067199887  |
| 8 | 6 | 17.000 | -0.0001954119041800  |
| 8 | 6 | 17.250 | -0.0000907453887702  |
| 8 | 6 | 17.500 | 0.0000966937607785   |
| 8 | 6 | 17.750 | 0.0002913292620230   |
| 8 | 6 | 18.000 | 0.0004176328105556   |
| 8 | 6 | 18.250 | 0.0004226706977979   |
| 8 | 6 | 18.500 | 0.0003436708698603   |
| 8 | 6 | 18.750 | 0.0002403841472336   |
| 8 | 6 | 19.000 | 0.0001726345921101   |
| 8 | 6 | 19.250 | 0.0001825508872134   |
| 8 | 6 | 19.500 | 0.0002411312373064   |
| 8 | 6 | 19.750 | 0.0003016003062263   |
| 8 | 6 | 20.000 | 0.0003173117958764   |
| 8 | 6 | 20.250 | 0.0002567348320078   |
| 8 | 6 | 20.500 | 0.0001484050808832   |
| 8 | 6 | 20.750 | 0.0000358355937515   |
| 8 | 6 | 21.000 | -0.0000375084731295  |
| 8 | 6 | 21.250 | -0.0000408373043095  |
| 8 | 6 | 21.500 | 0.0000057990208062   |
| 8 | 6 | 21.750 | 0.0000696421984558   |
| 8 | 6 | 22.000 | 0.0001179521345219   |
| 8 | 6 | 22.250 | 0.0001265193505670   |
| 8 | 6 | 22.500 | 0.0001053213079223   |
| 8 | 6 | 22.750 | 0.0000729485041805   |
| 8 | 6 | 23.000 | 0.0000480277038497   |
| 8 | 6 | 23.250 | 0.0000439801062822   |
| 8 | 6 | 23.500 | 0.0000533159055265   |
| 8 | 6 | 23.750 | 0.0000633191944827   |
| 8 | 6 | 24.000 | 0.0000613514587851   |
| 8 | 6 | 24.250 | 0.0000399084625558   |
| 8 | 6 | 24.500 | 0.0000114634302760   |
| 8 | 6 | 24.750 | -0.0000065687704275  |
| 8 | 6 | 25.000 | 0.0000031821229933   |
| 8 | 6 | 25.250 | 0.0000510652792526   |
| 8 | 6 | 25.500 | 0.0001198109218079   |
| 8 | 6 | 25.750 | 0.0001854185268840   |
| 8 | 6 | 26.000 | 0.0002239838887927   |
| 8 | 6 | 26.250 | 0.0002192951298290   |
| 8 | 6 | 26.500 | 0.0001858514400744   |
| 8 | 6 | 26.750 | 0.0001459634785538   |
| 8 | 6 | 27.000 | 0.0001223493154171   |
| 8 | 6 | 27.250 | 0.0001298565733559   |
| 8 | 6 | 27.500 | 0.0001505584287566   |
| 8 | 6 | 27.750 | 0.0001582856827494   |
| 8 | 6 | 28.000 | 0.0001270382905132   |
| 8 | 6 | 28.250 | 0.0000422422792571   |
| 8 | 6 | 28.500 | -0.0000657387845819  |
| 8 | 6 | 28.750 | -0.0001554287917254  |

|   |   |        |                       |
|---|---|--------|-----------------------|
| 8 | 6 | 29.000 | -0.0001852374457973   |
| 8 | 6 | 29.250 | -0.0001291779592609   |
| 8 | 6 | 29.500 | -0.0000241771633135   |
| 8 | 6 | 29.750 | 0.0000771851472374    |
| 8 | 6 | 30.000 | 0.0001225861185815    |
| 9 | 0 | 4.000  | 4071.7876000105306957 |
| 9 | 0 | 4.250  | 1644.2001394536539465 |
| 9 | 0 | 4.500  | 666.7756908396030440  |
| 9 | 0 | 4.750  | 282.4818549444572682  |
| 9 | 0 | 5.000  | 130.0413662456604129  |
| 9 | 0 | 5.250  | 66.1271860166429519   |
| 9 | 0 | 5.500  | 36.6863439974806909   |
| 9 | 0 | 5.750  | 21.6075982554377788   |
| 9 | 0 | 6.000  | 13.1593679608231184   |
| 9 | 0 | 6.250  | 8.1357958800918766    |
| 9 | 0 | 6.500  | 5.0520292659633981    |
| 9 | 0 | 6.750  | 3.1330946374490392    |
| 9 | 0 | 7.000  | 1.9302935089095303    |
| 9 | 0 | 7.250  | 1.1850312511465217    |
| 9 | 0 | 7.500  | 0.7212079443812911    |
| 9 | 0 | 7.750  | 0.4355310785465478    |
| 9 | 0 | 8.000  | 0.2593832408918761    |
| 9 | 0 | 8.250  | 0.1503237235806913    |
| 9 | 0 | 8.500  | 0.0842377412242051    |
| 9 | 0 | 8.750  | 0.0425828135778976    |
| 9 | 0 | 9.000  | 0.0216180278645428    |
| 9 | 0 | 9.250  | 0.0091498161517626    |
| 9 | 0 | 9.500  | 0.0027377603158771    |
| 9 | 0 | 9.750  | -0.0007309737818330   |
| 9 | 0 | 10.000 | -0.0023246790213133   |
| 9 | 0 | 10.250 | -0.0028993698844994   |
| 9 | 0 | 10.500 | -0.0022624777623507   |
| 9 | 0 | 10.750 | -0.0070541137879792   |
| 9 | 0 | 11.000 | 0.0027484172344173    |
| 9 | 0 | 11.250 | -0.0025169166718023   |
| 9 | 0 | 11.500 | 0.0031707333745079    |
| 9 | 0 | 11.750 | -0.0016220756993378   |
| 9 | 0 | 12.000 | 0.0001028671330765    |
| 9 | 0 | 12.250 | 0.0022315669494312    |
| 9 | 0 | 12.500 | 0.0021462471419352    |
| 9 | 0 | 12.750 | 0.0009064832187201    |
| 9 | 0 | 13.000 | -0.0004287092506598   |
| 9 | 0 | 13.250 | -0.0010289926853616   |
| 9 | 0 | 13.500 | -0.0009769134324199   |
| 9 | 0 | 13.750 | -0.0005830306763589   |
| 9 | 0 | 14.000 | -0.0001576586384131   |
| 9 | 0 | 14.250 | 0.0000563835908137    |
| 9 | 0 | 14.500 | 0.0000855508909382    |
| 9 | 0 | 14.750 | 0.0000235568209219    |
| 9 | 0 | 15.000 | -0.0000357995589498   |
| 9 | 0 | 15.250 | -0.0000211288350237   |
| 9 | 0 | 15.500 | 0.0000489622432509    |
| 9 | 0 | 15.750 | 0.0001333839351028    |
| 9 | 0 | 16.000 | 0.0001912525522415    |
| 9 | 0 | 16.250 | 0.0001920732410722    |
| 9 | 0 | 16.500 | 0.0001458559973478    |
| 9 | 0 | 16.750 | 0.0000726139846684    |
| 9 | 0 | 17.000 | -0.0000077030951726   |
| 9 | 0 | 17.250 | -0.0000776288064222   |
| 9 | 0 | 17.500 | -0.0001297303445063   |
| 9 | 0 | 17.750 | -0.0001590899640281   |
| 9 | 0 | 18.000 | -0.0001607936583223   |
| 9 | 0 | 18.250 | -0.0001337792390163   |
| 9 | 0 | 18.500 | -0.0000923749601257   |
| 9 | 0 | 18.750 | -0.0000547540770356   |
| 9 | 0 | 19.000 | -0.0000390741006110   |
| 9 | 0 | 19.250 | -0.0000568795774038   |
| 9 | 0 | 19.500 | -0.0000932984606457   |
| 9 | 0 | 19.750 | -0.0001268684590956   |
| 9 | 0 | 20.000 | -0.0001361261256759   |
| 9 | 0 | 20.250 | -0.0001067585888951   |
| 9 | 0 | 20.500 | -0.0000530051961451   |
| 9 | 0 | 20.750 | 0.0000037607802516    |
| 9 | 0 | 21.000 | 0.0000421744395879    |
| 9 | 0 | 21.250 | 0.0000464823508019    |
| 9 | 0 | 21.500 | 0.0000233657790453    |
| 9 | 0 | 21.750 | -0.0000148692608702   |
| 9 | 0 | 22.000 | -0.0000559011372734   |
| 9 | 0 | 22.250 | -0.0000894920222349   |
| 9 | 0 | 22.500 | -0.0001137684150043   |
| 9 | 0 | 22.750 | -0.0001289384663864   |
| 9 | 0 | 23.000 | -0.0001351745136812   |
| 9 | 0 | 23.250 | -0.0001326960851919   |
| 9 | 0 | 23.500 | -0.0001220222516928   |
| 9 | 0 | 23.750 | -0.0001037524382238   |
| 9 | 0 | 24.000 | -0.0000784821072648   |
| 9 | 0 | 24.250 | -0.0000477433925087   |
| 9 | 0 | 24.500 | -0.0000168643612479   |
| 9 | 0 | 24.750 | 0.0000078522530330    |
| 9 | 0 | 25.000 | 0.0000200796528609    |
| 9 | 0 | 25.250 | 0.0000144953272613    |
| 9 | 0 | 25.500 | -0.0000101901699475   |
| 9 | 0 | 25.750 | -0.0000542517199836   |
| 9 | 0 | 26.000 | -0.0001179994416178   |
| 9 | 0 | 26.250 | -0.0001973205022223   |

|   |   |        |                        |
|---|---|--------|------------------------|
| 9 | 0 | 26.500 | -0.0002703673429929    |
| 9 | 0 | 26.750 | -0.0003108737927102    |
| 9 | 0 | 27.000 | -0.0002926278363625    |
| 9 | 0 | 27.250 | -0.0002014883670780    |
| 9 | 0 | 27.500 | -0.0000713469002683    |
| 9 | 0 | 27.750 | 0.0000519362701417     |
| 9 | 0 | 28.000 | 0.0001224988590359     |
| 9 | 0 | 28.250 | 0.0001093539358065     |
| 9 | 0 | 28.500 | 0.0000410363540315     |
| 9 | 0 | 28.750 | -0.0000390351145552    |
| 9 | 0 | 29.000 | -0.0000874488397032    |
| 9 | 0 | 29.250 | -0.0000739161854498    |
| 9 | 0 | 29.500 | -0.0000205994557574    |
| 9 | 0 | 29.750 | 0.0000372376428154     |
| 9 | 0 | 30.000 | 0.0000643472618834     |
| 9 | 3 | 4.000  | -2021.8338587733924214 |
| 9 | 3 | 4.250  | -783.6077540354856410  |
| 9 | 3 | 4.500  | -302.2742776523934367  |
| 9 | 3 | 4.750  | -119.0574748409902099  |
| 9 | 3 | 5.000  | -49.3226258176654184   |
| 9 | 3 | 5.250  | -21.8549182465840701   |
| 9 | 3 | 5.500  | -10.3210715389623005   |
| 9 | 3 | 5.750  | -5.1098655634941537    |
| 9 | 3 | 6.000  | -2.5902044253134875    |
| 9 | 3 | 6.250  | -1.2915132443944799    |
| 9 | 3 | 6.500  | -0.5915408276339047    |
| 9 | 3 | 6.750  | -0.2330290397135286    |
| 9 | 3 | 7.000  | -0.0510830551884602    |
| 9 | 3 | 7.250  | 0.0323431932339098     |
| 9 | 3 | 7.500  | 0.0601930174380456     |
| 9 | 3 | 7.750  | 0.0593042952617266     |
| 9 | 3 | 8.000  | 0.0497608953250066     |
| 9 | 3 | 8.250  | 0.0387406043897487     |
| 9 | 3 | 8.500  | 0.0279694174764896     |
| 9 | 3 | 8.750  | 0.0182737560121941     |
| 9 | 3 | 9.000  | 0.0126153018884215     |
| 9 | 3 | 9.250  | 0.0115068630982147     |
| 9 | 3 | 9.500  | 0.0068103963458589     |
| 9 | 3 | 9.750  | 0.0029449233321911     |
| 9 | 3 | 10.000 | 0.0026329747576894     |
| 9 | 3 | 10.250 | 0.0002920600822311     |
| 9 | 3 | 10.500 | -0.0014420288840785    |
| 9 | 3 | 10.750 | -0.0067079834786871    |
| 9 | 3 | 11.000 | 0.0038737085223665     |
| 9 | 3 | 11.250 | 0.0064953971187867     |
| 9 | 3 | 11.500 | 0.0001197425375343     |
| 9 | 3 | 11.750 | -0.0008876739391873    |
| 9 | 3 | 12.000 | -0.0001499219701932    |
| 9 | 3 | 12.250 | 0.0002474758816129     |
| 9 | 3 | 12.500 | 0.0003501845546276     |
| 9 | 3 | 12.750 | 0.0003018027828106     |
| 9 | 3 | 13.000 | 0.0002500608605501     |
| 9 | 3 | 13.250 | 0.0002980767131762     |
| 9 | 3 | 13.500 | 0.0003866366755501     |
| 9 | 3 | 13.750 | 0.0004182987393032     |
| 9 | 3 | 14.000 | 0.0002963475029373     |
| 9 | 3 | 14.250 | -0.0000355045512807    |
| 9 | 3 | 14.500 | -0.0004703160331137    |
| 9 | 3 | 14.750 | -0.0008600583229409    |
| 9 | 3 | 15.000 | -0.0010565738617572    |
| 9 | 3 | 15.250 | -0.0009579086992722    |
| 9 | 3 | 15.500 | -0.0006467728803528    |
| 9 | 3 | 15.750 | -0.0002520340600231    |
| 9 | 3 | 16.000 | 0.0000975484165061     |
| 9 | 3 | 16.250 | 0.0003026940194599     |
| 9 | 3 | 16.500 | 0.0003817040984129     |
| 9 | 3 | 16.750 | 0.0003822248711112     |
| 9 | 3 | 17.000 | 0.0003519131633094     |
| 9 | 3 | 17.250 | 0.0003283999334102     |
| 9 | 3 | 17.500 | 0.0003090224222822     |
| 9 | 3 | 17.750 | 0.0002809807096977     |
| 9 | 3 | 18.000 | 0.0002314466488641     |
| 9 | 3 | 18.250 | 0.0001548411197476     |
| 9 | 3 | 18.500 | 0.0000747026876093     |
| 9 | 3 | 18.750 | 0.0000218666092052     |
| 9 | 3 | 19.000 | 0.0000271535535646     |
| 9 | 3 | 19.250 | 0.0001081425558140     |
| 9 | 3 | 19.500 | 0.0002293874670579     |
| 9 | 3 | 19.750 | 0.0003421545515098     |
| 9 | 3 | 20.000 | 0.0003976549562618     |
| 9 | 3 | 20.250 | 0.0003624397436451     |
| 9 | 3 | 20.500 | 0.0002647280627494     |
| 9 | 3 | 20.750 | 0.0001481748261935     |
| 9 | 3 | 21.000 | 0.0000564206016432     |
| 9 | 3 | 21.250 | 0.0000218272202900     |
| 9 | 3 | 21.500 | 0.0000318042990327     |
| 9 | 3 | 21.750 | 0.0000625113888589     |
| 9 | 3 | 22.000 | 0.0000900943510951     |
| 9 | 3 | 22.250 | 0.0000963145034197     |
| 9 | 3 | 22.500 | 0.0000853224931687     |
| 9 | 3 | 22.750 | 0.0000668111488591     |
| 9 | 3 | 23.000 | 0.0000503639198425     |
| 9 | 3 | 23.250 | 0.0000433889707806     |
| 9 | 3 | 23.500 | 0.0000449545974360     |
| 9 | 3 | 23.750 | 0.0000520418093986     |

|   |   |        |                        |
|---|---|--------|------------------------|
| 9 | 3 | 24.000 | 0.0000615655440981     |
| 9 | 3 | 24.250 | 0.0000708250016241     |
| 9 | 3 | 24.500 | 0.0000789943922353     |
| 9 | 3 | 24.750 | 0.0000857372342846     |
| 9 | 3 | 25.000 | 0.0000906766154364     |
| 9 | 3 | 25.250 | 0.0000934488377113     |
| 9 | 3 | 25.500 | 0.0000939516432823     |
| 9 | 3 | 25.750 | 0.0000922321888235     |
| 9 | 3 | 26.000 | 0.0000884114242210     |
| 9 | 3 | 26.250 | 0.0000832218342813     |
| 9 | 3 | 26.500 | 0.0000800061232566     |
| 9 | 3 | 26.750 | 0.0000827645982541     |
| 9 | 3 | 27.000 | 0.0000956405625049     |
| 9 | 3 | 27.250 | 0.0001205269472058     |
| 9 | 3 | 27.500 | 0.0001494354399568     |
| 9 | 3 | 27.750 | 0.0001717036212703     |
| 9 | 3 | 28.000 | 0.0001764114358470     |
| 9 | 3 | 28.250 | 0.0001563419192081     |
| 9 | 3 | 28.500 | 0.0001200518122458     |
| 9 | 3 | 28.750 | 0.0000801836671529     |
| 9 | 3 | 29.000 | 0.0000494816340040     |
| 9 | 3 | 29.250 | 0.0000373137374861     |
| 9 | 3 | 29.500 | 0.0000390562306921     |
| 9 | 3 | 29.750 | 0.0000464258152665     |
| 9 | 3 | 30.000 | 0.0000508234171836     |
| 9 | 6 | 4.000  | -3194.4928985204387573 |
| 9 | 6 | 4.250  | -1452.2453717588123254 |
| 9 | 6 | 4.500  | -672.6573730000454816  |
| 9 | 6 | 4.750  | -334.7535244919017714  |
| 9 | 6 | 5.000  | -182.8127467513481861  |
| 9 | 6 | 5.250  | -108.0905798768344539  |
| 9 | 6 | 5.500  | -67.2197038145181978   |
| 9 | 6 | 5.750  | -42.8794073208014197   |
| 9 | 6 | 6.000  | -27.5961264496208969   |
| 9 | 6 | 6.250  | -17.7848679648561756   |
| 9 | 6 | 6.500  | -11.4523810552468994   |
| 9 | 6 | 6.750  | -7.3268041736721727    |
| 9 | 6 | 7.000  | -4.6609724999980493    |
| 9 | 6 | 7.250  | -2.9366791006292265    |
| 9 | 6 | 7.500  | -1.8295126532884858    |
| 9 | 6 | 7.750  | -1.1207971928326259    |
| 9 | 6 | 8.000  | -0.6783448945318042    |
| 9 | 6 | 8.250  | -0.4048523673106779    |
| 9 | 6 | 8.500  | -0.2441463400676647    |
| 9 | 6 | 8.750  | -0.1451981277743177    |
| 9 | 6 | 9.000  | -0.0868815669666434    |
| 9 | 6 | 9.250  | -0.0510685586269077    |
| 9 | 6 | 9.500  | -0.0309076929880190    |
| 9 | 6 | 9.750  | -0.0147187035395087    |
| 9 | 6 | 10.000 | -0.0076240915756451    |
| 9 | 6 | 10.250 | 0.0005955354320983     |
| 9 | 6 | 10.500 | 0.0035656842038272     |
| 9 | 6 | 10.750 | 0.0079483948455719     |
| 9 | 6 | 11.000 | -0.0058895001874595    |
| 9 | 6 | 11.250 | -0.0126069908958262    |
| 9 | 6 | 11.500 | 0.0006842319792661     |
| 9 | 6 | 11.750 | 0.0288277922498380     |
| 9 | 6 | 12.000 | 0.0020701998932868     |
| 9 | 6 | 12.250 | -0.0189500726290046    |
| 9 | 6 | 12.500 | -0.0201992138215310    |
| 9 | 6 | 12.750 | -0.0106870977301661    |
| 9 | 6 | 13.000 | 0.0005756878142043     |
| 9 | 6 | 13.250 | 0.0064238410370833     |
| 9 | 6 | 13.500 | 0.0070848638977938     |
| 9 | 6 | 13.750 | 0.0046356799150219     |
| 9 | 6 | 14.000 | 0.0011545233809091     |
| 9 | 6 | 14.250 | -0.0016321080551007    |
| 9 | 6 | 14.500 | -0.0034085448926675    |
| 9 | 6 | 14.750 | -0.0042128014043605    |
| 9 | 6 | 15.000 | -0.0040840886899916    |
| 9 | 6 | 15.250 | -0.0031272102675178    |
| 9 | 6 | 15.500 | -0.0017071729830549    |
| 9 | 6 | 15.750 | -0.0002539634150548    |
| 9 | 6 | 16.000 | 0.0008010244132643     |
| 9 | 6 | 16.250 | 0.0011470116533631     |
| 9 | 6 | 16.500 | 0.0009634019598970     |
| 9 | 6 | 16.750 | 0.0005531526071587     |
| 9 | 6 | 17.000 | 0.0002193964931660     |
| 9 | 6 | 17.250 | 0.0001875296941129     |
| 9 | 6 | 17.500 | 0.0003727419047556     |
| 9 | 6 | 17.750 | 0.0006128279941587     |
| 9 | 6 | 18.000 | 0.0007454459348395     |
| 9 | 6 | 18.250 | 0.0006528992381919     |
| 9 | 6 | 18.500 | 0.0003964949156784     |
| 9 | 6 | 18.750 | 0.0000823521502289     |
| 9 | 6 | 19.000 | -0.0001833904948673    |
| 9 | 6 | 19.250 | -0.0003199911633230    |
| 9 | 6 | 19.500 | -0.0003479848046704    |
| 9 | 6 | 19.750 | -0.0003132628048152    |
| 9 | 6 | 20.000 | -0.0002618271255175    |
| 9 | 6 | 20.250 | -0.0002289021444103    |
| 9 | 6 | 20.500 | -0.0002059501164697    |
| 9 | 6 | 20.750 | -0.0001733027000273    |
| 9 | 6 | 21.000 | -0.0001112292853955    |
| 9 | 6 | 21.250 | -0.000089855736706     |



|   |   |        |                        |
|---|---|--------|------------------------|
| 9 | 6 | 21.500 | 0.0001082387024839     |
| 9 | 6 | 21.750 | 0.0002063462950635     |
| 9 | 6 | 22.000 | 0.0002514071162310     |
| 9 | 6 | 22.250 | 0.0002229256336685     |
| 9 | 6 | 22.500 | 0.0001531483982762     |
| 9 | 6 | 22.750 | 0.0000874607469468     |
| 9 | 6 | 23.000 | 0.0000712830245389     |
| 9 | 6 | 23.250 | 0.0001334630905551     |
| 9 | 6 | 23.500 | 0.0002360933848443     |
| 9 | 6 | 23.750 | 0.0003243633745655     |
| 9 | 6 | 24.000 | 0.0003432758807047     |
| 9 | 6 | 24.250 | 0.0002572865117801     |
| 9 | 6 | 24.500 | 0.0001087296045836     |
| 9 | 6 | 24.750 | -0.0000405848468964    |
| 9 | 6 | 25.000 | -0.0001289516857624    |
| 9 | 6 | 25.250 | -0.0001130775244761    |
| 9 | 6 | 25.500 | -0.0000227302336524    |
| 9 | 6 | 25.750 | 0.0000939719725625     |
| 9 | 6 | 26.000 | 0.0001887354969200     |
| 9 | 6 | 26.250 | 0.0002253710510272     |
| 9 | 6 | 26.500 | 0.0002171086819814     |
| 9 | 6 | 26.750 | 0.0001896141620540     |
| 9 | 6 | 27.000 | 0.0001684404653359     |
| 9 | 6 | 27.250 | 0.0001720618808991     |
| 9 | 6 | 27.500 | 0.0001911399167032     |
| 9 | 6 | 27.750 | 0.0002095985318293     |
| 9 | 6 | 28.000 | 0.0002116059874946     |
| 9 | 6 | 28.250 | 0.0001878114147906     |
| 9 | 6 | 28.500 | 0.0001540811788743     |
| 9 | 6 | 28.750 | 0.0001325403497186     |
| 9 | 6 | 29.000 | 0.0001454147246138     |
| 9 | 6 | 29.250 | 0.0002059145406115     |
| 9 | 6 | 29.500 | 0.0002901922202791     |
| 9 | 6 | 29.750 | 0.0003651136611389     |
| 9 | 6 | 30.000 | 0.0003974890407349     |
| 9 | 9 | 4.000  | -4525.6985101117834347 |
| 9 | 9 | 4.250  | -1780.1388458544793139 |
| 9 | 9 | 4.500  | -690.9987272071152802  |
| 9 | 9 | 4.750  | -272.8382640245310427  |
| 9 | 9 | 5.000  | -114.2841667989380454  |
| 9 | 9 | 5.250  | -52.5284748092373377   |
| 9 | 9 | 5.500  | -26.7247750086846594   |
| 9 | 9 | 5.750  | -14.7873131014263066   |
| 9 | 9 | 6.000  | -8.6418434530036023    |
| 9 | 9 | 6.250  | -5.2034752851760260    |
| 9 | 9 | 6.500  | -3.1682857912843403    |
| 9 | 9 | 6.750  | -1.9449827334214582    |
| 9 | 9 | 7.000  | -1.1931478115718086    |
| 9 | 9 | 7.250  | -0.7296256785051085    |
| 9 | 9 | 7.500  | -0.4407537469482987    |
| 9 | 9 | 7.750  | -0.2683082354016675    |
| 9 | 9 | 8.000  | -0.1601953355958950    |
| 9 | 9 | 8.250  | -0.0933128431420724    |
| 9 | 9 | 8.500  | -0.0534107720452984    |
| 9 | 9 | 8.750  | -0.0285891132982613    |
| 9 | 9 | 9.000  | -0.0151389946336525    |
| 9 | 9 | 9.250  | -0.0097008272719508    |
| 9 | 9 | 9.500  | -0.0051052922413231    |
| 9 | 9 | 9.750  | -0.0030220011939362    |
| 9 | 9 | 10.000 | -0.0021428069629448    |
| 9 | 9 | 10.250 | -0.0009687975025473    |
| 9 | 9 | 10.500 | -0.0004585205066651    |
| 9 | 9 | 10.750 | 0.0047842109819339     |
| 9 | 9 | 11.000 | 0.0039355936712203     |
| 9 | 9 | 11.250 | -0.0003721469431788    |
| 9 | 9 | 11.500 | -0.0097693668021588    |
| 9 | 9 | 11.750 | 0.0011234301473016     |
| 9 | 9 | 12.000 | -0.0001645276488932    |
| 9 | 9 | 12.250 | -0.0031354814540692    |
| 9 | 9 | 12.500 | -0.0032119814690046    |
| 9 | 9 | 12.750 | -0.0017366491043403    |
| 9 | 9 | 13.000 | -0.0000454109673371    |
| 9 | 9 | 13.250 | 0.0008053752551980     |
| 9 | 9 | 13.500 | 0.0008818941737570     |
| 9 | 9 | 13.750 | 0.0005322301545019     |
| 9 | 9 | 14.000 | 0.0001044928439411     |
| 9 | 9 | 14.250 | -0.0001267013281472    |
| 9 | 9 | 14.500 | -0.0001775825922012    |
| 9 | 9 | 14.750 | -0.0001366879126349    |
| 9 | 9 | 15.000 | -0.0000922124904724    |
| 9 | 9 | 15.250 | -0.0001111588728906    |
| 9 | 9 | 15.500 | -0.0001766001737103    |
| 9 | 9 | 15.750 | -0.0002506179958666    |
| 9 | 9 | 16.000 | -0.0002950558527096    |
| 9 | 9 | 16.250 | -0.0002797636758580    |
| 9 | 9 | 16.500 | -0.0002079400303181    |
| 9 | 9 | 16.750 | -0.0000912989960728    |
| 9 | 9 | 17.000 | 0.0000583832665395     |
| 9 | 9 | 17.250 | 0.0002249127166905     |
| 9 | 9 | 17.500 | 0.0003743237335089     |
| 9 | 9 | 17.750 | 0.0004681974887065     |
| 9 | 9 | 18.000 | 0.0004681336770120     |
| 9 | 9 | 18.250 | 0.0003519948346113     |
| 9 | 9 | 18.500 | 0.0001625936834254     |
| 9 | 9 | 18.750 | -0.0000410580080644    |

|    |   |        |                        |
|----|---|--------|------------------------|
| 9  | 9 | 19.000 | -0.0002000132295930    |
| 9  | 9 | 19.250 | -0.0002701848525570    |
| 9  | 9 | 19.500 | -0.0002668408745635    |
| 9  | 9 | 19.750 | -0.0002200567562081    |
| 9  | 9 | 20.000 | -0.0001599253528323    |
| 9  | 9 | 20.250 | -0.000113241613521     |
| 9  | 9 | 20.500 | -0.0000782604056768    |
| 9  | 9 | 20.750 | -0.0000595164331427    |
| 9  | 9 | 21.000 | -0.0000539320158106    |
| 9  | 9 | 21.250 | -0.0000603539897566    |
| 9  | 9 | 21.500 | -0.0000775510524460    |
| 9  | 9 | 21.750 | -0.0001042694191387    |
| 9  | 9 | 22.000 | -0.0001392498301231    |
| 9  | 9 | 22.250 | -0.0001799270341432    |
| 9  | 9 | 22.500 | -0.0002184313429810    |
| 9  | 9 | 22.750 | -0.0002455458683639    |
| 9  | 9 | 23.000 | -0.0002520558460998    |
| 9  | 9 | 23.250 | -0.0002322339459223    |
| 9  | 9 | 23.500 | -0.0001942681403519    |
| 9  | 9 | 23.750 | -0.0001498121319022    |
| 9  | 9 | 24.000 | -0.0001105003774092    |
| 9  | 9 | 24.250 | -0.0000854374047777    |
| 9  | 9 | 24.500 | -0.0000736742635921    |
| 9  | 9 | 24.750 | -0.0000717496697213    |
| 9  | 9 | 25.000 | -0.0000761627096950    |
| 9  | 9 | 25.250 | -0.0000838125168800    |
| 9  | 9 | 25.500 | -0.0000933000202160    |
| 9  | 9 | 25.750 | -0.0001036598270340    |
| 9  | 9 | 26.000 | -0.0001139035673881    |
| 9  | 9 | 26.250 | -0.0001233314662443    |
| 9  | 9 | 26.500 | -0.0001324014600580    |
| 9  | 9 | 26.750 | -0.0001418329215663    |
| 9  | 9 | 27.000 | -0.0001522719779903    |
| 9  | 9 | 27.250 | -0.0001634570388470    |
| 9  | 9 | 27.500 | -0.0001716290006341    |
| 9  | 9 | 27.750 | -0.0001722111342585    |
| 9  | 9 | 28.000 | -0.0001605748454413    |
| 9  | 9 | 28.250 | -0.0001346114369219    |
| 9  | 9 | 28.500 | -0.0001026268096024    |
| 9  | 9 | 28.750 | -0.0000756945800270    |
| 9  | 9 | 29.000 | -0.0000650718072038    |
| 9  | 9 | 29.250 | -0.000077755567255     |
| 9  | 9 | 29.500 | -0.0001038745609093    |
| 9  | 9 | 29.750 | -0.0001293816446716    |
| 9  | 9 | 30.000 | -0.0001408171788444    |
| 10 | 0 | 4.000  | -2364.5147478867384052 |
| 10 | 0 | 4.250  | -930.7112490108611382  |
| 10 | 0 | 4.500  | -360.3090236111920603  |
| 10 | 0 | 4.750  | -140.9666430572669924  |
| 10 | 0 | 5.000  | -58.0473211389216885   |
| 10 | 0 | 5.250  | -26.0901903490307632   |
| 10 | 0 | 5.500  | -12.9762121993728670   |
| 10 | 0 | 5.750  | -7.0448587358064287    |
| 10 | 0 | 6.000  | -4.0587330171963458    |
| 10 | 0 | 6.250  | -2.4139954044788965    |
| 10 | 0 | 6.500  | -1.4583189050824359    |
| 10 | 0 | 6.750  | -0.8880215786941221    |
| 10 | 0 | 7.000  | -0.5411144814675453    |
| 10 | 0 | 7.250  | -0.3288472136078244    |
| 10 | 0 | 7.500  | -0.1940052419821718    |
| 10 | 0 | 7.750  | -0.1153326181636203    |
| 10 | 0 | 8.000  | -0.0673437829751506    |
| 10 | 0 | 8.250  | -0.0372072203347926    |
| 10 | 0 | 8.500  | -0.0196845982155693    |
| 10 | 0 | 8.750  | -0.0102538713855722    |
| 10 | 0 | 9.000  | -0.0048146509285765    |
| 10 | 0 | 9.250  | -0.0037999550449541    |
| 10 | 0 | 9.500  | -0.0033916360406394    |
| 10 | 0 | 9.750  | -0.0012889072210402    |
| 10 | 0 | 10.000 | -0.0009188722148021    |
| 10 | 0 | 10.250 | -0.0004902006815186    |
| 10 | 0 | 10.500 | -0.0000141389863035    |
| 10 | 0 | 10.750 | 0.0019448239505291     |
| 10 | 0 | 11.000 | 0.0042640431546195     |
| 10 | 0 | 11.250 | 0.0011101206443911     |
| 10 | 0 | 11.500 | -0.0005612176245240    |
| 10 | 0 | 11.750 | -0.0000510434795649    |
| 10 | 0 | 12.000 | -0.0004960259368909    |
| 10 | 0 | 12.250 | -0.0007480031888405    |
| 10 | 0 | 12.500 | -0.0005102566064865    |
| 10 | 0 | 12.750 | -0.0000454955809532    |
| 10 | 0 | 13.000 | 0.0003836620504565     |
| 10 | 0 | 13.250 | 0.0005792824441886     |
| 10 | 0 | 13.500 | 0.0005888676652150     |
| 10 | 0 | 13.750 | 0.0005196658740818     |
| 10 | 0 | 14.000 | 0.0004781391168744     |
| 10 | 0 | 14.250 | 0.0005408270687788     |
| 10 | 0 | 14.500 | 0.0006652075540197     |
| 10 | 0 | 14.750 | 0.0007789537282823     |
| 10 | 0 | 15.000 | 0.0008097098015568     |
| 10 | 0 | 15.250 | 0.0007103212442454     |
| 10 | 0 | 15.500 | 0.0005344073149245     |
| 10 | 0 | 15.750 | 0.0003607483770454     |
| 10 | 0 | 16.000 | 0.0002679665043357     |
| 10 | 0 | 16.250 | 0.0003098134625479     |

|    |   |        |                       |
|----|---|--------|-----------------------|
| 10 | 0 | 16.500 | 0.0004412864854945    |
| 10 | 0 | 16.750 | 0.0005927934930777    |
| 10 | 0 | 17.000 | 0.0006947539313909    |
| 10 | 0 | 17.250 | 0.0006954826942746    |
| 10 | 0 | 17.500 | 0.0006149221186856    |
| 10 | 0 | 17.750 | 0.0004909513706706    |
| 10 | 0 | 18.000 | 0.0003614575377953    |
| 10 | 0 | 18.250 | 0.0002590272333754    |
| 10 | 0 | 18.500 | 0.0001949741879163    |
| 10 | 0 | 18.750 | 0.0001752906258154    |
| 10 | 0 | 19.000 | 0.0002059740281328    |
| 10 | 0 | 19.250 | 0.0002863630363791    |
| 10 | 0 | 19.500 | 0.0003891654345105    |
| 10 | 0 | 19.750 | 0.0004804160792838    |
| 10 | 0 | 20.000 | 0.0005261463360707    |
| 10 | 0 | 20.250 | 0.0005032186542571    |
| 10 | 0 | 20.500 | 0.0004318034895814    |
| 10 | 0 | 20.750 | 0.0003428721609578    |
| 10 | 0 | 21.000 | 0.0002673535029934    |
| 10 | 0 | 21.250 | 0.0002289533614788    |
| 10 | 0 | 21.500 | 0.0002225591405827    |
| 10 | 0 | 21.750 | 0.0002358581907546    |
| 10 | 0 | 22.000 | 0.0002564704568668    |
| 10 | 0 | 22.250 | 0.0002750905138734    |
| 10 | 0 | 22.500 | 0.0002948297728792    |
| 10 | 0 | 22.750 | 0.0003218888705343    |
| 10 | 0 | 23.000 | 0.0003624086193248    |
| 10 | 0 | 23.250 | 0.0004182871852754    |
| 10 | 0 | 23.500 | 0.0004747306400507    |
| 10 | 0 | 23.750 | 0.0005128158541119    |
| 10 | 0 | 24.000 | 0.0005135923200916    |
| 10 | 0 | 24.250 | 0.0004662119334602    |
| 10 | 0 | 24.500 | 0.0003923874926888    |
| 10 | 0 | 24.750 | 0.0003220109153126    |
| 10 | 0 | 25.000 | 0.0002850132951147    |
| 10 | 0 | 25.250 | 0.0003019539944280    |
| 10 | 0 | 25.500 | 0.0003558160891121    |
| 10 | 0 | 25.750 | 0.0004201666738640    |
| 10 | 0 | 26.000 | 0.0004685822280416    |
| 10 | 0 | 26.250 | 0.0004814349567762    |
| 10 | 0 | 26.500 | 0.0004662496307851    |
| 10 | 0 | 26.750 | 0.0004373154762511    |
| 10 | 0 | 27.000 | 0.0004088858517128    |
| 10 | 0 | 27.250 | 0.0003918899419743    |
| 10 | 0 | 27.500 | 0.0003839453060944    |
| 10 | 0 | 27.750 | 0.0003793345561593    |
| 10 | 0 | 28.000 | 0.0003722921817929    |
| 10 | 0 | 28.250 | 0.0003589845917352    |
| 10 | 0 | 28.500 | 0.0003434954009845    |
| 10 | 0 | 28.750 | 0.0003319218926322    |
| 10 | 0 | 29.000 | 0.0003303598074687    |
| 10 | 0 | 29.250 | 0.0003423648163507    |
| 10 | 0 | 29.500 | 0.0003616031340563    |
| 10 | 0 | 29.750 | 0.0003793774903409    |
| 10 | 0 | 30.000 | 0.0003871761097221    |
| 10 | 3 | 4.000  | 6500.7344562613343442 |
| 10 | 3 | 4.250  | 2567.8202826184710830 |
| 10 | 3 | 4.500  | 1002.0054973765795694 |
| 10 | 3 | 4.750  | 398.4076668626297533  |
| 10 | 3 | 5.000  | 168.0347903427433494  |
| 10 | 3 | 5.250  | 77.5231166811830121   |
| 10 | 3 | 5.500  | 39.3733213289845310   |
| 10 | 3 | 5.750  | 21.6645606680657039   |
| 10 | 3 | 6.000  | 12.5821306792143446   |
| 10 | 3 | 6.250  | 7.5306624386781209    |
| 10 | 3 | 6.500  | 4.5434769041265923    |
| 10 | 3 | 6.750  | 2.7580805511450563    |
| 10 | 3 | 7.000  | 1.6538686357477239    |
| 10 | 3 | 7.250  | 0.9774336644175499    |
| 10 | 3 | 7.500  | 0.5625624859596936    |
| 10 | 3 | 7.750  | 0.3210019815349980    |
| 10 | 3 | 8.000  | 0.1805822010404978    |
| 10 | 3 | 8.250  | 0.1014230064827468    |
| 10 | 3 | 8.500  | 0.0577804473031186    |
| 10 | 3 | 8.750  | 0.0350357166336764    |
| 10 | 3 | 9.000  | 0.0234893363520572    |
| 10 | 3 | 9.250  | 0.0153193134018040    |
| 10 | 3 | 9.500  | 0.0152901820778764    |
| 10 | 3 | 9.750  | 0.0099429830640918    |
| 10 | 3 | 10.000 | 0.0074368538602038    |
| 10 | 3 | 10.250 | 0.0037808934545779    |
| 10 | 3 | 10.500 | 0.0012215614569354    |
| 10 | 3 | 10.750 | -0.0031019644344319   |
| 10 | 3 | 11.000 | -0.0025340021153645   |
| 10 | 3 | 11.250 | -0.0027636810321851   |
| 10 | 3 | 11.500 | -0.0044598521194710   |
| 10 | 3 | 11.750 | -0.0012920693909982   |
| 10 | 3 | 12.000 | 0.0000300800620941    |
| 10 | 3 | 12.250 | 0.0002243692220424    |
| 10 | 3 | 12.500 | 0.0001547327745422    |
| 10 | 3 | 12.750 | -0.0000848630954367   |
| 10 | 3 | 13.000 | -0.0004001264114492   |
| 10 | 3 | 13.250 | -0.0006983312205616   |
| 10 | 3 | 13.500 | -0.0008905161849208   |
| 10 | 3 | 13.750 | -0.0008884163969342   |

|    |   |        |                        |
|----|---|--------|------------------------|
| 10 | 3 | 14.000 | -0.0006036580789476    |
| 10 | 3 | 14.250 | 0.0000000728683228     |
| 10 | 3 | 14.500 | 0.0007508532594239     |
| 10 | 3 | 14.750 | 0.0014245987964941     |
| 10 | 3 | 15.000 | 0.0017969979969646     |
| 10 | 3 | 15.250 | 0.0017126015994196     |
| 10 | 3 | 15.500 | 0.0012920055880415     |
| 10 | 3 | 15.750 | 0.0007248344984028     |
| 10 | 3 | 16.000 | 0.0002003851996835     |
| 10 | 3 | 16.250 | -0.0001340054632075    |
| 10 | 3 | 16.500 | -0.0002972853173683    |
| 10 | 3 | 16.750 | -0.0003497774082052    |
| 10 | 3 | 17.000 | -0.0003517388482445    |
| 10 | 3 | 17.250 | -0.0003513314018334    |
| 10 | 3 | 17.500 | -0.0003479014216548    |
| 10 | 3 | 17.750 | -0.0003285679616057    |
| 10 | 3 | 18.000 | -0.0002803726233836    |
| 10 | 3 | 18.250 | -0.0001979522074760    |
| 10 | 3 | 18.500 | -0.0001063244426690    |
| 10 | 3 | 18.750 | -0.0000381001027852    |
| 10 | 3 | 19.000 | -0.0000258629002793    |
| 10 | 3 | 19.250 | -0.0000902353005918    |
| 10 | 3 | 19.500 | -0.0002040767155617    |
| 10 | 3 | 19.750 | -0.0003282851642454    |
| 10 | 3 | 20.000 | -0.0004237283136945    |
| 10 | 3 | 20.250 | -0.0004605277804325    |
| 10 | 3 | 20.500 | -0.0004459710232371    |
| 10 | 3 | 20.750 | -0.0003965665864536    |
| 10 | 3 | 21.000 | -0.0003287682404283    |
| 10 | 3 | 21.250 | -0.0002577791609864    |
| 10 | 3 | 21.500 | -0.0001940135182782    |
| 10 | 3 | 21.750 | -0.0001466778188945    |
| 10 | 3 | 22.000 | -0.0001248573772725    |
| 10 | 3 | 22.250 | -0.0001325663340115    |
| 10 | 3 | 22.500 | -0.0001537957551562    |
| 10 | 3 | 22.750 | -0.0001675709563583    |
| 10 | 3 | 23.000 | -0.0001528482033768    |
| 10 | 3 | 23.250 | -0.0000974499533166    |
| 10 | 3 | 23.500 | -0.0000251120683116    |
| 10 | 3 | 23.750 | 0.0000314086337748     |
| 10 | 3 | 24.000 | 0.0000392770795275     |
| 10 | 3 | 24.250 | -0.0000219168388203    |
| 10 | 3 | 24.500 | -0.0001228330709686    |
| 10 | 3 | 24.750 | -0.0002216395485794    |
| 10 | 3 | 25.000 | -0.0002764435699359    |
| 10 | 3 | 25.250 | -0.0002577622046176    |
| 10 | 3 | 25.500 | -0.0001858546378152    |
| 10 | 3 | 25.750 | -0.0000933821175928    |
| 10 | 3 | 26.000 | -0.0000129299426349    |
| 10 | 3 | 26.250 | 0.0000302183227304     |
| 10 | 3 | 26.500 | 0.0000395779225552     |
| 10 | 3 | 26.750 | 0.0000257647465180     |
| 10 | 3 | 27.000 | -0.0000006322379544    |
| 10 | 3 | 27.250 | -0.0000298081602222    |
| 10 | 3 | 27.500 | -0.0000556529021817    |
| 10 | 3 | 27.750 | -0.0000731944582626    |
| 10 | 3 | 28.000 | -0.0000778801448117    |
| 10 | 3 | 28.250 | -0.0000677127467237    |
| 10 | 3 | 28.500 | -0.0000496934815921    |
| 10 | 3 | 28.750 | -0.0000329430329392    |
| 10 | 3 | 29.000 | -0.0000266659243282    |
| 10 | 3 | 29.250 | -0.0000368853699758    |
| 10 | 3 | 29.500 | -0.0000566449167029    |
| 10 | 3 | 29.750 | -0.0000757855555793    |
| 10 | 3 | 30.000 | -0.0000843478863435    |
| 10 | 6 | 4.000  | -9034.9769193253014237 |
| 10 | 6 | 4.250  | -3498.9200966973075992 |
| 10 | 6 | 4.500  | -1332.1275967448400479 |
| 10 | 6 | 4.750  | -510.3845770598309173  |
| 10 | 6 | 5.000  | -204.0632610473840032  |
| 10 | 6 | 5.250  | -88.1457060106713470   |
| 10 | 6 | 5.500  | -41.9070106567096445   |
| 10 | 6 | 5.750  | -21.8504866939526892   |
| 10 | 6 | 6.000  | -12.2130699628264665   |
| 10 | 6 | 6.250  | -7.0923582733293529    |
| 10 | 6 | 6.500  | -4.1885924070469400    |
| 10 | 6 | 6.750  | -2.4992009093988381    |
| 10 | 6 | 7.000  | -1.4700789914140806    |
| 10 | 6 | 7.250  | -0.8659147319162983    |
| 10 | 6 | 7.500  | -0.5139410191908524    |
| 10 | 6 | 7.750  | -0.3208687514642069    |
| 10 | 6 | 8.000  | -0.2070736425189352    |
| 10 | 6 | 8.250  | -0.1357285772011210    |
| 10 | 6 | 8.500  | -0.0969827686406290    |
| 10 | 6 | 8.750  | -0.0653655420724633    |
| 10 | 6 | 9.000  | -0.0452678423668971    |
| 10 | 6 | 9.250  | -0.0261486807590217    |
| 10 | 6 | 9.500  | -0.0170036842711809    |
| 10 | 6 | 9.750  | -0.0063979207524554    |
| 10 | 6 | 10.000 | -0.0023549689194979    |
| 10 | 6 | 10.250 | 0.0022369016298533     |
| 10 | 6 | 10.500 | 0.0011281814458712     |
| 10 | 6 | 10.750 | 0.0015887548170248     |
| 10 | 6 | 11.000 | -0.0179143765935859    |
| 10 | 6 | 11.250 | 0.0127923085758006     |

|    |   |        |                        |
|----|---|--------|------------------------|
| 10 | 6 | 11.500 | -0.0206318662630771    |
| 10 | 6 | 11.750 | -0.0110559117949300    |
| 10 | 6 | 12.000 | 0.0002475583301687     |
| 10 | 6 | 12.250 | 0.0038629656033606     |
| 10 | 6 | 12.500 | 0.0041567988086664     |
| 10 | 6 | 12.750 | 0.0026300374971520     |
| 10 | 6 | 13.000 | 0.0007878564700503     |
| 10 | 6 | 13.250 | -0.0001658837832732    |
| 10 | 6 | 13.500 | -0.0002652534698302    |
| 10 | 6 | 13.750 | 0.0001425591405653     |
| 10 | 6 | 14.000 | 0.0007073101932642     |
| 10 | 6 | 14.250 | 0.0011357405493104     |
| 10 | 6 | 14.500 | 0.0013705236122123     |
| 10 | 6 | 14.750 | 0.0014150293044013     |
| 10 | 6 | 15.000 | 0.0012743639846486     |
| 10 | 6 | 15.250 | 0.0009720068533567     |
| 10 | 6 | 15.500 | 0.0006017517085968     |
| 10 | 6 | 15.750 | 0.0002746708123165     |
| 10 | 6 | 16.000 | 0.0001032189584529     |
| 10 | 6 | 16.250 | 0.0001583226961686     |
| 10 | 6 | 16.500 | 0.0003368255669089     |
| 10 | 6 | 16.750 | 0.0004910095403123     |
| 10 | 6 | 17.000 | 0.0004729109094755     |
| 10 | 6 | 17.250 | 0.0001902398890029     |
| 10 | 6 | 17.500 | -0.0002279129641094    |
| 10 | 6 | 17.750 | -0.0005972427113591    |
| 10 | 6 | 18.000 | -0.0007333854848136    |
| 10 | 6 | 18.250 | -0.0005120743815609    |
| 10 | 6 | 18.500 | -0.0000494813601460    |
| 10 | 6 | 18.750 | 0.0004781901141406     |
| 10 | 6 | 19.000 | 0.0008950163202019     |
| 10 | 6 | 19.250 | 0.0010682522960921     |
| 10 | 6 | 19.500 | 0.0010370711109510     |
| 10 | 6 | 19.750 | 0.0008837392962021     |
| 10 | 6 | 20.000 | 0.0006909454445761     |
| 10 | 6 | 20.250 | 0.0005274978600720     |
| 10 | 6 | 20.500 | 0.0004048048033552     |
| 10 | 6 | 20.750 | 0.0003197733335416     |
| 10 | 6 | 21.000 | 0.0002692363534839     |
| 10 | 6 | 21.250 | 0.0002480909320120     |
| 10 | 6 | 21.500 | 0.0002428119005936     |
| 10 | 6 | 21.750 | 0.0002376826449967     |
| 10 | 6 | 22.000 | 0.0002169314883699     |
| 10 | 6 | 22.250 | 0.0001706423326273     |
| 10 | 6 | 22.500 | 0.0001127748896366     |
| 10 | 6 | 22.750 | 0.0000633260519739     |
| 10 | 6 | 23.000 | 0.0000423925853568     |
| 10 | 6 | 23.250 | 0.0000618602145376     |
| 10 | 6 | 23.500 | 0.0001011416891949     |
| 10 | 6 | 23.750 | 0.0001315668909578     |
| 10 | 6 | 24.000 | 0.0001245428574149     |
| 10 | 6 | 24.250 | 0.0000638412911562     |
| 10 | 6 | 24.500 | -0.0000182401600271    |
| 10 | 6 | 24.750 | -0.0000772236410723    |
| 10 | 6 | 25.000 | -0.0000686375000690    |
| 10 | 6 | 25.250 | 0.0000346489524722     |
| 10 | 6 | 25.500 | 0.0001907683819837     |
| 10 | 6 | 25.750 | 0.0003409695900330     |
| 10 | 6 | 26.000 | 0.0004269186573709     |
| 10 | 6 | 26.250 | 0.0004084323402246     |
| 10 | 6 | 26.500 | 0.0003178146765929     |
| 10 | 6 | 26.750 | 0.0002059000365925     |
| 10 | 6 | 27.000 | 0.0001245148534611     |
| 10 | 6 | 27.250 | 0.0001092016448818     |
| 10 | 6 | 27.500 | 0.0001268565631987     |
| 10 | 6 | 27.750 | 0.0001271989768856     |
| 10 | 6 | 28.000 | 0.0000605330944608     |
| 10 | 6 | 28.250 | -0.0001009520686182    |
| 10 | 6 | 28.500 | -0.0002994229562936    |
| 10 | 6 | 28.750 | -0.0004555751207529    |
| 10 | 6 | 29.000 | -0.0004892510788329    |
| 10 | 6 | 29.250 | -0.0003510801253708    |
| 10 | 6 | 29.500 | -0.0001182517629490    |
| 10 | 6 | 29.750 | 0.0001004771099690     |
| 10 | 6 | 30.000 | 0.0001972702519300     |
| 10 | 9 | 4.000  | 10228.8130024968613725 |
| 10 | 9 | 4.250  | 3990.4337033412880373  |
| 10 | 9 | 4.500  | 1525.7676608926681183  |
| 10 | 9 | 4.750  | 586.4530108172839391   |
| 10 | 9 | 5.000  | 235.6937356273469959   |
| 10 | 9 | 5.250  | 102.8368318316532282   |
| 10 | 9 | 5.500  | 49.6276747912854432    |
| 10 | 9 | 5.750  | 26.2814202381254631    |
| 10 | 9 | 6.000  | 14.8564108391573946    |
| 10 | 9 | 6.250  | 8.7274209728463710     |
| 10 | 9 | 6.500  | 5.1889256927890415     |
| 10 | 9 | 6.750  | 3.1112165202234223     |
| 10 | 9 | 7.000  | 1.8469968145833526     |
| 10 | 9 | 7.250  | 1.0860767407323735     |
| 10 | 9 | 7.500  | 0.6207835823678387     |
| 10 | 9 | 7.750  | 0.3574287629316695     |
| 10 | 9 | 8.000  | 0.2058647513687077     |
| 10 | 9 | 8.250  | 0.1189190776877523     |
| 10 | 9 | 8.500  | 0.0696992478096255     |
| 10 | 9 | 8.750  | 0.0434577937054843     |

|    |   |        |                       |
|----|---|--------|-----------------------|
| 10 | 9 | 9.000  | 0.0290468027240214    |
| 10 | 9 | 9.250  | 0.0187468629794979    |
| 10 | 9 | 9.500  | 0.0161107637708382    |
| 10 | 9 | 9.750  | 0.0070932539914722    |
| 10 | 9 | 10.000 | 0.0064847919670327    |
| 10 | 9 | 10.250 | 0.0002761569991173    |
| 10 | 9 | 10.500 | -0.0000101039012137   |
| 10 | 9 | 10.750 | 0.0037952047107416    |
| 10 | 9 | 11.000 | 0.0035544974212587    |
| 10 | 9 | 11.250 | -0.0035513127300921   |
| 10 | 9 | 11.500 | 0.0081181981044948    |
| 10 | 9 | 11.750 | -0.0054601775234069   |
| 10 | 9 | 12.000 | -0.0004609824304893   |
| 10 | 9 | 12.250 | 0.0055292053767213    |
| 10 | 9 | 12.500 | 0.0057805919761970    |
| 10 | 9 | 12.750 | 0.0029203114792445    |
| 10 | 9 | 13.000 | -0.0004467936943803   |
| 10 | 9 | 13.250 | -0.0022468265789600   |
| 10 | 9 | 13.500 | -0.0025178428292628   |
| 10 | 9 | 13.750 | -0.0018268808788530   |
| 10 | 9 | 14.000 | -0.0007395794466461   |
| 10 | 9 | 14.250 | 0.0002664947371201    |
| 10 | 9 | 14.500 | 0.0010540637749364    |
| 10 | 9 | 14.750 | 0.0015690865134678    |
| 10 | 9 | 15.000 | 0.0017554826260720    |
| 10 | 9 | 15.250 | 0.0015923205698337    |
| 10 | 9 | 15.500 | 0.0012046395243655    |
| 10 | 9 | 15.750 | 0.0007541891013862    |
| 10 | 9 | 16.000 | 0.0004012579414160    |
| 10 | 9 | 16.250 | 0.0002600207362822    |
| 10 | 9 | 16.500 | 0.0002684848038574    |
| 10 | 9 | 16.750 | 0.0003217443278980    |
| 10 | 9 | 17.000 | 0.0003152347231548    |
| 10 | 9 | 17.250 | 0.0001752743433871    |
| 10 | 9 | 17.500 | -0.0000477460179203   |
| 10 | 9 | 17.750 | -0.0002722689968321   |
| 10 | 9 | 18.000 | -0.0004168107705554   |
| 10 | 9 | 18.250 | -0.0004238303426335   |
| 10 | 9 | 18.500 | -0.0003312274400707   |
| 10 | 9 | 18.750 | -0.0002006776668297   |
| 10 | 9 | 19.000 | -0.0000937166997546   |
| 10 | 9 | 19.250 | -0.0000576680355147   |
| 10 | 9 | 19.500 | -0.0000834619866925   |
| 10 | 9 | 19.750 | -0.0001481084457901   |
| 10 | 9 | 20.000 | -0.0002287341838257   |
| 10 | 9 | 20.250 | -0.0003047300563102   |
| 10 | 9 | 20.500 | -0.0003641287599336   |
| 10 | 9 | 20.750 | -0.0003971232123571   |
| 10 | 9 | 21.000 | -0.0003939057613755   |
| 10 | 9 | 21.250 | -0.0003501839043315   |
| 10 | 9 | 21.500 | -0.0002832127538110   |
| 10 | 9 | 21.750 | -0.0002155850347105   |
| 10 | 9 | 22.000 | -0.0001698439948937   |
| 10 | 9 | 22.250 | -0.0001621120868493   |
| 10 | 9 | 22.500 | -0.0001829191040582   |
| 10 | 9 | 22.750 | -0.0002164696103028   |
| 10 | 9 | 23.000 | -0.0002470265611822   |
| 10 | 9 | 23.250 | -0.0002620007616087   |
| 10 | 9 | 23.500 | -0.0002609185545233   |
| 10 | 9 | 23.750 | -0.0002462868217003   |
| 10 | 9 | 24.000 | -0.0002206117180452   |
| 10 | 9 | 24.250 | -0.0001872788899003   |
| 10 | 9 | 24.500 | -0.0001531248399627   |
| 10 | 9 | 24.750 | -0.0001257800843896   |
| 10 | 9 | 25.000 | -0.0001127350901609   |
| 10 | 9 | 25.250 | -0.0001199794672617   |
| 10 | 9 | 25.500 | -0.0001480741792054   |
| 10 | 9 | 25.750 | -0.0001963301413700   |
| 10 | 9 | 26.000 | -0.0002641458758784   |
| 10 | 9 | 26.250 | -0.0003469658633467   |
| 10 | 9 | 26.500 | -0.0004245763534877   |
| 10 | 9 | 26.750 | -0.0004728354799805   |
| 10 | 9 | 27.000 | -0.0004676468145245   |
| 10 | 9 | 27.250 | -0.0003950272267665   |
| 10 | 9 | 27.500 | -0.0002819397636730   |
| 10 | 9 | 27.750 | -0.0001657982851147   |
| 10 | 9 | 28.000 | -0.0000844590016203   |
| 10 | 9 | 28.250 | -0.0000657782654693   |
| 10 | 9 | 28.500 | -0.0000964489997583   |
| 10 | 9 | 28.750 | -0.0001528903368895   |
| 10 | 9 | 29.000 | -0.0002117032145486   |
| 10 | 9 | 29.250 | -0.0002537475253271   |
| 10 | 9 | 29.500 | -0.0002777487583947   |
| 10 | 9 | 29.750 | -0.0002877576647700   |
| 10 | 9 | 30.000 | -0.0002896270399008   |
| 11 | 0 | 4.000  | -304.2670023935979202 |
| 11 | 0 | 4.250  | -114.7213512562110509 |
| 11 | 0 | 4.500  | -43.0828456924098191  |
| 11 | 0 | 4.750  | -16.7724820961208252  |
| 11 | 0 | 5.000  | -7.0406487923553698   |
| 11 | 0 | 5.250  | -3.2440864851557478   |
| 11 | 0 | 5.500  | -1.6165486835292455   |
| 11 | 0 | 5.750  | -0.8593797981432658   |
| 11 | 0 | 6.000  | -0.4752290851881327   |
| 11 | 0 | 6.250  | -0.2713653927758894   |

|    |   |        |                     |
|----|---|--------|---------------------|
| 11 | 0 | 6.500  | -0.1639519834589755 |
| 11 | 0 | 6.750  | -0.1010251963432225 |
| 11 | 0 | 7.000  | -0.0669340867106918 |
| 11 | 0 | 7.250  | -0.0432120783146903 |
| 11 | 0 | 7.500  | -0.0258986733888502 |
| 11 | 0 | 7.750  | -0.0156686756248210 |
| 11 | 0 | 8.000  | -0.0090208972672405 |
| 11 | 0 | 8.250  | -0.0043796124872696 |
| 11 | 0 | 8.500  | -0.0018368419538283 |
| 11 | 0 | 8.750  | 0.0000019517382526  |
| 11 | 0 | 9.000  | 0.0008486512249755  |
| 11 | 0 | 9.250  | -0.0000992611082882 |
| 11 | 0 | 9.500  | 0.0014265892093435  |
| 11 | 0 | 9.750  | 0.0005743029701749  |
| 11 | 0 | 10.000 | 0.0009388414702458  |
| 11 | 0 | 10.250 | 0.0003875291017164  |
| 11 | 0 | 10.500 | 0.0001151040106529  |
| 11 | 0 | 10.750 | 0.0041733862693347  |
| 11 | 0 | 11.000 | -0.0020702930834456 |
| 11 | 0 | 11.250 | -0.0041486048868610 |
| 11 | 0 | 11.500 | 0.0003356300791828  |
| 11 | 0 | 11.750 | -0.0008213747457118 |
| 11 | 0 | 12.000 | 0.0006601935240794  |
| 11 | 0 | 12.250 | 0.0019263182494881  |
| 11 | 0 | 12.500 | 0.0018793074647191  |
| 11 | 0 | 12.750 | 0.0011310220184935  |
| 11 | 0 | 13.000 | 0.0002934384983969  |
| 11 | 0 | 13.250 | -0.0001532058905575 |
| 11 | 0 | 13.500 | -0.0002560946848357 |
| 11 | 0 | 13.750 | -0.0001943355066043 |
| 11 | 0 | 14.000 | -0.0001471388751466 |
| 11 | 0 | 14.250 | -0.0002478613769049 |
| 11 | 0 | 14.500 | -0.0004460289061780 |
| 11 | 0 | 14.750 | -0.0006451215487436 |
| 11 | 0 | 15.000 | -0.0007485534903483 |
| 11 | 0 | 15.250 | -0.0006887475980958 |
| 11 | 0 | 15.500 | -0.0005143162822161 |
| 11 | 0 | 15.750 | -0.0003029511764437 |
| 11 | 0 | 16.000 | -0.0001324038546912 |
| 11 | 0 | 16.250 | -0.0000605283891506 |
| 11 | 0 | 16.500 | -0.0000654803609849 |
| 11 | 0 | 16.750 | -0.0001054921939213 |
| 11 | 0 | 17.000 | -0.0001387541274498 |
| 11 | 0 | 17.250 | -0.0001339934674493 |
| 11 | 0 | 17.500 | -0.0001021072024097 |
| 11 | 0 | 17.750 | -0.0000645640055424 |
| 11 | 0 | 18.000 | -0.0000428555094300 |
| 11 | 0 | 18.250 | -0.0000504536309292 |
| 11 | 0 | 18.500 | -0.0000686958774593 |
| 11 | 0 | 18.750 | -0.0000708785257768 |
| 11 | 0 | 19.000 | -0.0000303194143267 |
| 11 | 0 | 19.250 | 0.0000679305864343  |
| 11 | 0 | 19.500 | 0.0001919667568149  |
| 11 | 0 | 19.750 | 0.0002981802774202  |
| 11 | 0 | 20.000 | 0.0003429800416588  |
| 11 | 0 | 20.250 | 0.0002978629235439  |
| 11 | 0 | 20.500 | 0.0001947692853530  |
| 11 | 0 | 20.750 | 0.0000807675890920  |
| 11 | 0 | 21.000 | 0.0000029667795421  |
| 11 | 0 | 21.250 | -0.0000052047493929 |
| 11 | 0 | 21.500 | 0.0000348429576120  |
| 11 | 0 | 21.750 | 0.0000879665936681  |
| 11 | 0 | 22.000 | 0.0001190202198536  |
| 11 | 0 | 22.250 | 0.0001032175243957  |
| 11 | 0 | 22.500 | 0.0000571301711703  |
| 11 | 0 | 22.750 | 0.0000076676093481  |
| 11 | 0 | 23.000 | -0.0000182709217598 |
| 11 | 0 | 23.250 | -0.0000023075479626 |
| 11 | 0 | 23.500 | 0.0000398071678161  |
| 11 | 0 | 23.750 | 0.0000837685217424  |
| 11 | 0 | 24.000 | 0.0001052608001916  |
| 11 | 0 | 24.250 | 0.0000870770257372  |
| 11 | 0 | 24.500 | 0.0000404620187031  |
| 11 | 0 | 24.750 | -0.0000162533327133 |
| 11 | 0 | 25.000 | -0.0000647892335613 |
| 11 | 0 | 25.250 | -0.0000897467784388 |
| 11 | 0 | 25.500 | -0.0000870332995129 |
| 11 | 0 | 25.750 | -0.0000553672511933 |
| 11 | 0 | 26.000 | 0.0000065096701247  |
| 11 | 0 | 26.250 | 0.0000951273737769  |
| 11 | 0 | 26.500 | 0.0001882642161390  |
| 11 | 0 | 26.750 | 0.0002590476821458  |
| 11 | 0 | 27.000 | 0.0002806138759443  |
| 11 | 0 | 27.250 | 0.0002365635431816  |
| 11 | 0 | 27.500 | 0.0001523859657052  |
| 11 | 0 | 27.750 | 0.0000640923155794  |
| 11 | 0 | 28.000 | 0.0000077888276362  |
| 11 | 0 | 28.250 | 0.0000087112834693  |
| 11 | 0 | 28.500 | 0.0000482807939264  |
| 11 | 0 | 28.750 | 0.0000968990538473  |
| 11 | 0 | 29.000 | 0.0001249654127769  |
| 11 | 0 | 29.250 | 0.000118558073874   |
| 11 | 0 | 29.500 | 0.0000727621824899  |
| 11 | 0 | 29.750 | 0.0000317374776677  |
| 11 | 0 | 30.000 | 0.0000127467915046  |

|    |   |        |                        |
|----|---|--------|------------------------|
| 11 | 3 | 4.000  | -3885.8703666264909771 |
| 11 | 3 | 4.250  | -1521.4615755612942394 |
| 11 | 3 | 4.500  | -581.6671840455722986  |
| 11 | 3 | 4.750  | -222.0421652526079015  |
| 11 | 3 | 5.000  | -87.7545564355490910   |
| 11 | 3 | 5.250  | -37.2679391029361113   |
| 11 | 3 | 5.500  | -17.3809573539175233   |
| 11 | 3 | 5.750  | -8.8851389301454162    |
| 11 | 3 | 6.000  | -4.8771425747047772    |
| 11 | 3 | 6.250  | -2.8149662084673821    |
| 11 | 3 | 6.500  | -1.6470567048462073    |
| 11 | 3 | 6.750  | -0.9879077192442338    |
| 11 | 3 | 7.000  | -0.5869185877152727    |
| 11 | 3 | 7.250  | -0.3419775463601091    |
| 11 | 3 | 7.500  | -0.1907253288543522    |
| 11 | 3 | 7.750  | -0.1037199393521488    |
| 11 | 3 | 8.000  | -0.0502589907474189    |
| 11 | 3 | 8.250  | -0.0222841463505565    |
| 11 | 3 | 8.500  | -0.0095004892711439    |
| 11 | 3 | 8.750  | -0.0032519850740750    |
| 11 | 3 | 9.000  | -0.0017924173818610    |
| 11 | 3 | 9.250  | -0.0016180843057773    |
| 11 | 3 | 9.500  | -0.0017445214393113    |
| 11 | 3 | 9.750  | -0.0026987444977073    |
| 11 | 3 | 10.000 | -0.0027536034778720    |
| 11 | 3 | 10.250 | -0.0019252972753547    |
| 11 | 3 | 10.500 | -0.0026483595686437    |
| 11 | 3 | 10.750 | -0.0013963277108929    |
| 11 | 3 | 11.000 | 0.0073203570962970     |
| 11 | 3 | 11.250 | 0.0034579837671341     |
| 11 | 3 | 11.500 | 0.0004538781565898     |
| 11 | 3 | 11.750 | 0.002230298687728      |
| 11 | 3 | 12.000 | -0.0004944355735686    |
| 11 | 3 | 12.250 | -0.0024726104224567    |
| 11 | 3 | 12.500 | -0.0024024350965661    |
| 11 | 3 | 12.750 | -0.0012226339832371    |
| 11 | 3 | 13.000 | 0.0001244053835666     |
| 11 | 3 | 13.250 | 0.0008843533438002     |
| 11 | 3 | 13.500 | 0.0010423978064708     |
| 11 | 3 | 13.750 | 0.0007667368248730     |
| 11 | 3 | 14.000 | 0.0002249606483392     |
| 11 | 3 | 14.250 | -0.0004206916827941    |
| 11 | 3 | 14.500 | -0.0010300068470191    |
| 11 | 3 | 14.750 | -0.0014683988133646    |
| 11 | 3 | 15.000 | -0.0016012148928554    |
| 11 | 3 | 15.250 | -0.0013479228005303    |
| 11 | 3 | 15.500 | -0.0008449707925186    |
| 11 | 3 | 15.750 | -0.0002830471505284    |
| 11 | 3 | 16.000 | 0.0001473446946570     |
| 11 | 3 | 16.250 | 0.0003059336406871     |
| 11 | 3 | 16.500 | 0.0002524788284793     |
| 11 | 3 | 16.750 | 0.0000966102845663     |
| 11 | 3 | 17.000 | -0.0000520313950446    |
| 11 | 3 | 17.250 | -0.0001068661444639    |
| 11 | 3 | 17.500 | -0.0000737347425580    |
| 11 | 3 | 17.750 | 0.0000183598568068     |
| 11 | 3 | 18.000 | 0.0001404090342444     |
| 11 | 3 | 18.250 | 0.0002643853473115     |
| 11 | 3 | 18.500 | 0.0003661405076719     |
| 11 | 3 | 18.750 | 0.0004224646166807     |
| 11 | 3 | 19.000 | 0.0004100615890154     |
| 11 | 3 | 19.250 | 0.0003177265705539     |
| 11 | 3 | 19.500 | 0.0001828147819534     |
| 11 | 3 | 19.750 | 0.0000548077497543     |
| 11 | 3 | 20.000 | -0.0000168643383556    |
| 11 | 3 | 20.250 | 0.0000014138322717     |
| 11 | 3 | 20.500 | 0.0000803243396091     |
| 11 | 3 | 20.750 | 0.0001748477855603     |
| 11 | 3 | 21.000 | 0.0002399251458756     |
| 11 | 3 | 21.250 | 0.0002427664118943     |
| 11 | 3 | 21.500 | 0.0001996539176747     |
| 11 | 3 | 21.750 | 0.0001391273353828     |
| 11 | 3 | 22.000 | 0.0000896554913517     |
| 11 | 3 | 22.250 | 0.0000729605150220     |
| 11 | 3 | 22.500 | 0.0000839306816313     |
| 11 | 3 | 22.750 | 0.0001107449838141     |
| 11 | 3 | 23.000 | 0.0001415035670123     |
| 11 | 3 | 23.250 | 0.0001662223613560     |
| 11 | 3 | 23.500 | 0.0001828585572007     |
| 11 | 3 | 23.750 | 0.0001913631274525     |
| 11 | 3 | 24.000 | 0.0001916568408629     |
| 11 | 3 | 24.250 | 0.0001838186705770     |
| 11 | 3 | 24.500 | 0.0001687033485574     |
| 11 | 3 | 24.750 | 0.0001473336775539     |
| 11 | 3 | 25.000 | 0.0001206462885745     |
| 11 | 3 | 25.250 | 0.0000902101157751     |
| 11 | 3 | 25.500 | 0.0000604760773156     |
| 11 | 3 | 25.750 | 0.0000366778911689     |
| 11 | 3 | 26.000 | 0.0000240421223851     |
| 11 | 3 | 26.250 | 0.0000259318650341     |
| 11 | 3 | 26.500 | 0.0000387857357725     |
| 11 | 3 | 26.750 | 0.0000574277736043     |
| 11 | 3 | 27.000 | 0.0000768925376808     |
| 11 | 3 | 27.250 | 0.0000932769458758     |
| 11 | 3 | 27.500 | 0.0001063806610449     |



|    |   |        |                        |
|----|---|--------|------------------------|
| 11 | 3 | 27.750 | 0.0001169599658631     |
| 11 | 3 | 28.000 | 0.0001258983314098     |
| 11 | 3 | 28.250 | 0.0001336593194499     |
| 11 | 3 | 28.500 | 0.0001390286114802     |
| 11 | 3 | 28.750 | 0.0001405318105621     |
| 11 | 3 | 29.000 | 0.0001371135578593     |
| 11 | 3 | 29.250 | 0.0001287970304566     |
| 11 | 3 | 29.500 | 0.0001184272302922     |
| 11 | 3 | 29.750 | 0.0001094957177245     |
| 11 | 3 | 30.000 | 0.0001056701565649     |
| 11 | 6 | 4.000  | 10551.7618865563126747 |
| 11 | 6 | 4.250  | 4106.4377848841695595  |
| 11 | 6 | 4.500  | 1560.8974545566334200  |
| 11 | 6 | 4.750  | 592.3921650627950157   |
| 11 | 6 | 5.000  | 232.5977241892259144   |
| 11 | 6 | 5.250  | 98.0182776569901080    |
| 11 | 6 | 5.500  | 45.3553027052967650    |
| 11 | 6 | 5.750  | 23.0523568345852823    |
| 11 | 6 | 6.000  | 12.5886807179919629    |
| 11 | 6 | 6.250  | 7.1837664869164541     |
| 11 | 6 | 6.500  | 4.1883873593049543     |
| 11 | 6 | 6.750  | 2.4909827194679224     |
| 11 | 6 | 7.000  | 1.4594686254502562     |
| 11 | 6 | 7.250  | 0.8529015449747774     |
| 11 | 6 | 7.500  | 0.4931828564445269     |
| 11 | 6 | 7.750  | 0.3039007923054946     |
| 11 | 6 | 8.000  | 0.1873241587298020     |
| 11 | 6 | 8.250  | 0.1232515927259894     |
| 11 | 6 | 8.500  | 0.0762163987834028     |
| 11 | 6 | 8.750  | 0.0539755815574072     |
| 11 | 6 | 9.000  | 0.0371110314548384     |
| 11 | 6 | 9.250  | 0.0266441083100047     |
| 11 | 6 | 9.500  | 0.0224000959309942     |
| 11 | 6 | 9.750  | 0.0179384117862544     |
| 11 | 6 | 10.000 | 0.0151418572794005     |
| 11 | 6 | 10.250 | 0.0102737749017989     |
| 11 | 6 | 10.500 | 0.0055715401521462     |
| 11 | 6 | 10.750 | 0.0035000764910414     |
| 11 | 6 | 11.000 | -0.0157588048259790    |
| 11 | 6 | 11.250 | -0.0074828801274548    |
| 11 | 6 | 11.500 | 0.0344056999396335     |
| 11 | 6 | 11.750 | 0.0007742928037877     |
| 11 | 6 | 12.000 | 0.0002689466563845     |
| 11 | 6 | 12.250 | 0.0072407149082743     |
| 11 | 6 | 12.500 | 0.0074404213773940     |
| 11 | 6 | 12.750 | 0.0040344417290935     |
| 11 | 6 | 13.000 | 0.0001971329873300     |
| 11 | 6 | 13.250 | -0.0015893953811346    |
| 11 | 6 | 13.500 | -0.0015659988159303    |
| 11 | 6 | 13.750 | -0.0006479651485384    |
| 11 | 6 | 14.000 | 0.0002528973518037     |
| 11 | 6 | 14.250 | 0.0004417086807734     |
| 11 | 6 | 14.500 | 0.0000873346964416     |
| 11 | 6 | 14.750 | -0.0004264479546047    |
| 11 | 6 | 15.000 | -0.0007170659407331    |
| 11 | 6 | 15.250 | -0.0005127689340620    |
| 11 | 6 | 15.500 | 0.0000165236967654     |
| 11 | 6 | 15.750 | 0.0005905111503981     |
| 11 | 6 | 16.000 | 0.0009273595231298     |
| 11 | 6 | 16.250 | 0.0008293971379487     |
| 11 | 6 | 16.500 | 0.0004447523988584     |
| 11 | 6 | 16.750 | 0.0000092691570195     |
| 11 | 6 | 17.000 | -0.0002409251704577    |
| 11 | 6 | 17.250 | -0.0001406414422941    |
| 11 | 6 | 17.500 | 0.0001920222734129     |
| 11 | 6 | 17.750 | 0.0005682500462647     |
| 11 | 6 | 18.000 | 0.0007991295429431     |
| 11 | 6 | 18.250 | 0.0007470426296369     |
| 11 | 6 | 18.500 | 0.0004799549783429     |
| 11 | 6 | 18.750 | 0.0001172971957813     |
| 11 | 6 | 19.000 | -0.0002212967776499    |
| 11 | 6 | 19.250 | -0.0004395155593597    |
| 11 | 6 | 19.500 | -0.0005344363131355    |
| 11 | 6 | 19.750 | -0.0005266799133697    |
| 11 | 6 | 20.000 | -0.0004370133798775    |
| 11 | 6 | 20.250 | -0.0002874980901825    |
| 11 | 6 | 20.500 | -0.0001048989419521    |
| 11 | 6 | 20.750 | 0.0000829606126255     |
| 11 | 6 | 21.000 | 0.0002480679646374     |
| 11 | 6 | 21.250 | 0.0003669175220559     |
| 11 | 6 | 21.500 | 0.0004349386098740     |
| 11 | 6 | 21.750 | 0.0004525826243403     |
| 11 | 6 | 22.000 | 0.0004203856723217     |
| 11 | 6 | 22.250 | 0.0003443387673042     |
| 11 | 6 | 22.500 | 0.0002511513221286     |
| 11 | 6 | 22.750 | 0.0001728074180466     |
| 11 | 6 | 23.000 | 0.0001414151915847     |
| 11 | 6 | 23.250 | 0.0001765209111260     |
| 11 | 6 | 23.500 | 0.0002464425735035     |
| 11 | 6 | 23.750 | 0.0003062627759263     |
| 11 | 6 | 24.000 | 0.0003108158299969     |
| 11 | 6 | 24.250 | 0.0002307945230274     |
| 11 | 6 | 24.500 | 0.0001006279038649     |
| 11 | 6 | 24.750 | -0.0000293492669724    |
| 11 | 6 | 25.000 | -0.0001091084408560    |

|    |   |        |                         |
|----|---|--------|-------------------------|
| 11 | 6 | 25.250 | -0.0001026255874427     |
| 11 | 6 | 25.500 | -0.0000286687622841     |
| 11 | 6 | 25.750 | 0.0000801811942361      |
| 11 | 6 | 26.000 | 0.0001909167153953      |
| 11 | 6 | 26.250 | 0.0002763418606934      |
| 11 | 6 | 26.500 | 0.0003351545752240      |
| 11 | 6 | 26.750 | 0.0003728234874492      |
| 11 | 6 | 27.000 | 0.0003948703682391      |
| 11 | 6 | 27.250 | 0.0004062311000101      |
| 11 | 6 | 27.500 | 0.0004102835977490      |
| 11 | 6 | 27.750 | 0.0004105842775021      |
| 11 | 6 | 28.000 | 0.0004114094676020      |
| 11 | 6 | 28.250 | 0.0004162087180568      |
| 11 | 6 | 28.500 | 0.0004233354775777      |
| 11 | 6 | 28.750 | 0.0004299198399480      |
| 11 | 6 | 29.000 | 0.0004337297515850      |
| 11 | 6 | 29.250 | 0.0004338135573979      |
| 11 | 6 | 29.500 | 0.0004313729558294      |
| 11 | 6 | 29.750 | 0.0004282100175305      |
| 11 | 6 | 30.000 | 0.0004265869047135      |
| 11 | 9 | 4.000  | -11385.9608902262862102 |
| 11 | 9 | 4.250  | -4424.6749156812438741  |
| 11 | 9 | 4.500  | -1674.2657330845331671  |
| 11 | 9 | 4.750  | -629.7261838053664178   |
| 11 | 9 | 5.000  | -243.7997371005112655   |
| 11 | 9 | 5.250  | -100.8907459048829196   |
| 11 | 9 | 5.500  | -45.8329039318859373    |
| 11 | 9 | 5.750  | -22.9380461551034784    |
| 11 | 9 | 6.000  | -12.3885432420083639    |
| 11 | 9 | 6.250  | -7.0122612121106158     |
| 11 | 9 | 6.500  | -4.0519707283001338     |
| 11 | 9 | 6.750  | -2.3851762400401668     |
| 11 | 9 | 7.000  | -1.3906653800956406     |
| 11 | 9 | 7.250  | -0.8054801362983000     |
| 11 | 9 | 7.500  | -0.4562432468354203     |
| 11 | 9 | 7.750  | -0.2652793805452873     |
| 11 | 9 | 8.000  | -0.1524423353680913     |
| 11 | 9 | 8.250  | -0.0898479297238586     |
| 11 | 9 | 8.500  | -0.0553304690687775     |
| 11 | 9 | 8.750  | -0.0371479982063639     |
| 11 | 9 | 9.000  | -0.0241531653558416     |
| 11 | 9 | 9.250  | -0.0220887112725621     |
| 11 | 9 | 9.500  | -0.0200807672708871     |
| 11 | 9 | 9.750  | -0.0204487212724307     |
| 11 | 9 | 10.000 | -0.0164750410387853     |
| 11 | 9 | 10.250 | -0.0127907255307214     |
| 11 | 9 | 10.500 | -0.0087023000474273     |
| 11 | 9 | 10.750 | 0.0003305030653397      |
| 11 | 9 | 11.000 | 0.0068946042388406      |
| 11 | 9 | 11.250 | 0.0087606772291594      |
| 11 | 9 | 11.500 | -0.0341187709246011     |
| 11 | 9 | 11.750 | 0.0141057282085231      |
| 11 | 9 | 12.000 | -0.0002020368448171     |
| 11 | 9 | 12.250 | -0.0189753444520646     |
| 11 | 9 | 12.500 | -0.0195563567081675     |
| 11 | 9 | 12.750 | -0.0104045002407049     |
| 11 | 9 | 13.000 | 0.0000655113465955      |
| 11 | 9 | 13.250 | 0.0052112196552061      |
| 11 | 9 | 13.500 | 0.0054426042350107      |
| 11 | 9 | 13.750 | 0.0029336166510058      |
| 11 | 9 | 14.000 | -0.0001455813228422     |
| 11 | 9 | 14.250 | -0.0020601358492103     |
| 11 | 9 | 14.500 | -0.0027908956965629     |
| 11 | 9 | 14.750 | -0.0027446865006460     |
| 11 | 9 | 15.000 | -0.0023253777388920     |
| 11 | 9 | 15.250 | -0.0018696369715744     |
| 11 | 9 | 15.500 | -0.0014524505319391     |
| 11 | 9 | 15.750 | -0.0010832958825013     |
| 11 | 9 | 16.000 | -0.0007691752622672     |
| 11 | 9 | 16.250 | -0.0005124237946745     |
| 11 | 9 | 16.500 | -0.0003092553804839     |
| 11 | 9 | 16.750 | -0.0001561388163245     |
| 11 | 9 | 17.000 | -0.0000502029064932     |
| 11 | 9 | 17.250 | 0.0000096495672105      |
| 11 | 9 | 17.500 | 0.0000168174386936      |
| 11 | 9 | 17.750 | -0.0000373364031029     |
| 11 | 9 | 18.000 | -0.0001613223448985     |
| 11 | 9 | 18.250 | -0.0003541595092267     |
| 11 | 9 | 18.500 | -0.0005775009472691     |
| 11 | 9 | 18.750 | -0.0007839593551037     |
| 11 | 9 | 19.000 | -0.0009266037563331     |
| 11 | 9 | 19.250 | -0.0009718283876807     |
| 11 | 9 | 19.500 | -0.0009385014566246     |
| 11 | 9 | 19.750 | -0.0008583490002724     |
| 11 | 9 | 20.000 | -0.0007631512434663     |
| 11 | 9 | 20.250 | -0.0006786569947950     |
| 11 | 9 | 20.500 | -0.0006063588556120     |
| 11 | 9 | 20.750 | -0.0005415663171077     |
| 11 | 9 | 21.000 | -0.0004795795906575     |
| 11 | 9 | 21.250 | -0.0004193907673626     |
| 11 | 9 | 21.500 | -0.0003750292520710     |
| 11 | 9 | 21.750 | -0.0003643868305157     |
| 11 | 9 | 22.000 | -0.0004052178584255     |
| 11 | 9 | 22.250 | -0.0005042946410610     |
| 11 | 9 | 22.500 | -0.0006250317228835     |

|    |   |        |                       |
|----|---|--------|-----------------------|
| 11 | 9 | 22.750 | -0.0007200697069703   |
| 11 | 9 | 23.000 | -0.0007422652091003   |
| 11 | 9 | 23.250 | -0.0006618080677936   |
| 11 | 9 | 23.500 | -0.0005173416315218   |
| 11 | 9 | 23.750 | -0.0003643726360895   |
| 11 | 9 | 24.000 | -0.0002582414652346   |
| 11 | 9 | 24.250 | -0.0002395263573186   |
| 11 | 9 | 24.500 | -0.0002902543555784   |
| 11 | 9 | 24.750 | -0.0003777890013100   |
| 11 | 9 | 25.000 | -0.0004691421780934   |
| 11 | 9 | 25.250 | -0.0005369686855504   |
| 11 | 9 | 25.500 | -0.0005773967330289   |
| 11 | 9 | 25.750 | -0.0005925039284409   |
| 11 | 9 | 26.000 | -0.0005841634884745   |
| 11 | 9 | 26.250 | -0.0005560173944968   |
| 11 | 9 | 26.500 | -0.0005199646411376   |
| 11 | 9 | 26.750 | -0.0004901479158007   |
| 11 | 9 | 27.000 | -0.000480680853326    |
| 11 | 9 | 27.250 | -0.0004985656802647   |
| 11 | 9 | 27.500 | -0.0005221197461627   |
| 11 | 9 | 27.750 | -0.0005227288516756   |
| 11 | 9 | 28.000 | -0.0004717860022786   |
| 11 | 9 | 28.250 | -0.0003549193763819   |
| 11 | 9 | 28.500 | -0.0002146278455362   |
| 11 | 9 | 28.750 | -0.0001082409726038   |
| 11 | 9 | 29.000 | -0.0000938724582896   |
| 11 | 9 | 29.250 | -0.0002062240717101   |
| 11 | 9 | 29.500 | -0.0003862061563322   |
| 11 | 9 | 29.750 | -0.0005521148255290   |
| 11 | 9 | 30.000 | -0.0006247162888924   |
| 12 | 0 | 4.000  | 1287.9990141741309344 |
| 12 | 0 | 4.250  | 486.0535770675014646  |
| 12 | 0 | 4.500  | 179.3258428177914539  |
| 12 | 0 | 4.750  | 65.3130617398528557   |
| 12 | 0 | 5.000  | 24.1144150307745804   |
| 12 | 0 | 5.250  | 9.3336016397890944    |
| 12 | 0 | 5.500  | 3.8938402302401300    |
| 12 | 0 | 5.750  | 1.7768188375123373    |
| 12 | 0 | 6.000  | 0.8776551452598937    |
| 12 | 0 | 6.250  | 0.4609345713964785    |
| 12 | 0 | 6.500  | 0.2524657896123301    |
| 12 | 0 | 6.750  | 0.1405382910707544    |
| 12 | 0 | 7.000  | 0.0834263315716175    |
| 12 | 0 | 7.250  | 0.0492230572093337    |
| 12 | 0 | 7.500  | 0.0291705483488194    |
| 12 | 0 | 7.750  | 0.0157210122621585    |
| 12 | 0 | 8.000  | 0.0094972969583011    |
| 12 | 0 | 8.250  | 0.0046233095750843    |
| 12 | 0 | 8.500  | 0.0011306621815805    |
| 12 | 0 | 8.750  | -0.0008608423967189   |
| 12 | 0 | 9.000  | -0.0005496729348096   |
| 12 | 0 | 9.250  | -0.0007922690250339   |
| 12 | 0 | 9.500  | -0.0012437589891974   |
| 12 | 0 | 9.750  | -0.0005592525249885   |
| 12 | 0 | 10.000 | -0.0006796026440856   |
| 12 | 0 | 10.250 | 0.0000760160914890    |
| 12 | 0 | 10.500 | -0.0001688141513476   |
| 12 | 0 | 10.750 | 0.0011018387945176    |
| 12 | 0 | 11.000 | 0.0031364722728338    |
| 12 | 0 | 11.250 | -0.0016787012889594   |
| 12 | 0 | 11.500 | 0.0021830751138223    |
| 12 | 0 | 11.750 | 0.0026287211560643    |
| 12 | 0 | 12.000 | -0.0002057395093402   |
| 12 | 0 | 12.250 | -0.0017681319373817   |
| 12 | 0 | 12.500 | -0.0017597769256952   |
| 12 | 0 | 12.750 | -0.0009256387628032   |
| 12 | 0 | 13.000 | -0.0000103372600080   |
| 12 | 0 | 13.250 | 0.0004026137924533    |
| 12 | 0 | 13.500 | 0.0003833187720772    |
| 12 | 0 | 13.750 | 0.0001664535695955    |
| 12 | 0 | 14.000 | -0.0000127412250808   |
| 12 | 0 | 14.250 | 0.0000231002332480    |
| 12 | 0 | 14.500 | 0.0002194297859723    |
| 12 | 0 | 14.750 | 0.0004637104706754    |
| 12 | 0 | 15.000 | 0.0006433811553656    |
| 12 | 0 | 15.250 | 0.0006743287999410    |
| 12 | 0 | 15.500 | 0.0005863675684326    |
| 12 | 0 | 15.750 | 0.0004378270198229    |
| 12 | 0 | 16.000 | 0.0002871127727102    |
| 12 | 0 | 16.250 | 0.0001816735374155    |
| 12 | 0 | 16.500 | 0.0001248744222602    |
| 12 | 0 | 16.750 | 0.0001090317275299    |
| 12 | 0 | 17.000 | 0.0001264751235560    |
| 12 | 0 | 17.250 | 0.0001678484269381    |
| 12 | 0 | 17.500 | 0.0002169832929180    |
| 12 | 0 | 17.750 | 0.0002559931058896    |
| 12 | 0 | 18.000 | 0.0002669826150755    |
| 12 | 0 | 18.250 | 0.0002379909923521    |
| 12 | 0 | 18.500 | 0.0001807545312810    |
| 12 | 0 | 18.750 | 0.0001129254260466    |
| 12 | 0 | 19.000 | 0.0000521683605711    |
| 12 | 0 | 19.250 | 0.0000121994601930    |
| 12 | 0 | 19.500 | -0.0000090867198070   |
| 12 | 0 | 19.750 | -0.0000177555815044   |
| 12 | 0 | 20.000 | -0.0000198953230792   |

|    |   |        |                       |
|----|---|--------|-----------------------|
| 12 | 0 | 20.250 | -0.0000207257369835   |
| 12 | 0 | 20.500 | -0.0000219249784215   |
| 12 | 0 | 20.750 | -0.0000242548363622   |
| 12 | 0 | 21.000 | -0.0000284551539280   |
| 12 | 0 | 21.250 | -0.0000344555485536   |
| 12 | 0 | 21.500 | -0.0000389081377517   |
| 12 | 0 | 21.750 | -0.0000376417216872   |
| 12 | 0 | 22.000 | -0.0000264470563584   |
| 12 | 0 | 22.250 | -0.0000032014623995   |
| 12 | 0 | 22.500 | 0.0000256919087373    |
| 12 | 0 | 22.750 | 0.0000517020727019    |
| 12 | 0 | 23.000 | 0.0000663151271604    |
| 12 | 0 | 23.250 | 0.0000640635289865    |
| 12 | 0 | 23.500 | 0.0000515659942132    |
| 12 | 0 | 23.750 | 0.0000384454140338    |
| 12 | 0 | 24.000 | 0.0000343402694921    |
| 12 | 0 | 24.250 | 0.0000460850364786    |
| 12 | 0 | 24.500 | 0.0000692681325201    |
| 12 | 0 | 24.750 | 0.0000966465566177    |
| 12 | 0 | 25.000 | 0.0001209728207004    |
| 12 | 0 | 25.250 | 0.0001362077887337    |
| 12 | 0 | 25.500 | 0.0001411891245242    |
| 12 | 0 | 25.750 | 0.0001359910495883    |
| 12 | 0 | 26.000 | 0.0001207016687462    |
| 12 | 0 | 26.250 | 0.0000965225137304    |
| 12 | 0 | 26.500 | 0.0000690924107280    |
| 12 | 0 | 26.750 | 0.0000451674904834    |
| 12 | 0 | 27.000 | 0.0000315255917543    |
| 12 | 0 | 27.250 | 0.000032918779681     |
| 12 | 0 | 27.500 | 0.0000460215555683    |
| 12 | 0 | 27.750 | 0.0000655143905481    |
| 12 | 0 | 28.000 | 0.0000861366143655    |
| 12 | 0 | 28.250 | 0.0001028654549834    |
| 12 | 0 | 28.500 | 0.0001116631628850    |
| 12 | 0 | 28.750 | 0.0001088063875928    |
| 12 | 0 | 29.000 | 0.0000907447418450    |
| 12 | 0 | 29.250 | 0.0000567314893354    |
| 12 | 0 | 29.500 | 0.0000167658708496    |
| 12 | 0 | 29.750 | -0.0000165246595011   |
| 12 | 0 | 30.000 | -0.0000304522512282   |
| 12 | 3 | 4.000  | -338.3164318528019976 |
| 12 | 3 | 4.250  | -110.6701134093304972 |
| 12 | 3 | 4.500  | -36.0242997066037560  |
| 12 | 3 | 4.750  | -11.7510794949152455  |
| 12 | 3 | 5.000  | -3.9407994594578213   |
| 12 | 3 | 5.250  | -1.3601286097117509   |
| 12 | 3 | 5.500  | -0.4563804808315268   |
| 12 | 3 | 5.750  | -0.1441595191531206   |
| 12 | 3 | 6.000  | -0.0152944522744392   |
| 12 | 3 | 6.250  | 0.0273881467097539    |
| 12 | 3 | 6.500  | 0.0228376869641309    |
| 12 | 3 | 6.750  | 0.0357812957739156    |
| 12 | 3 | 7.000  | 0.0251627451672753    |
| 12 | 3 | 7.250  | 0.0162744687341068    |
| 12 | 3 | 7.500  | 0.0114128194580942    |
| 12 | 3 | 7.750  | 0.0088370354846381    |
| 12 | 3 | 8.000  | 0.0065216232455052    |
| 12 | 3 | 8.250  | 0.0052841615360523    |
| 12 | 3 | 8.500  | 0.0023134512103987    |
| 12 | 3 | 8.750  | 0.0046932543174072    |
| 12 | 3 | 9.000  | 0.0018719762788605    |
| 12 | 3 | 9.250  | 0.0008541312504852    |
| 12 | 3 | 9.500  | 0.0019643374893339    |
| 12 | 3 | 9.750  | 0.0007940310758099    |
| 12 | 3 | 10.000 | 0.0020077104930919    |
| 12 | 3 | 10.250 | -0.0000507425608059   |
| 12 | 3 | 10.500 | -0.0007955018507204   |
| 12 | 3 | 10.750 | 0.0057513156519540    |
| 12 | 3 | 11.000 | 0.0001884400209308    |
| 12 | 3 | 11.250 | -0.0027344856653201   |
| 12 | 3 | 11.500 | -0.0001032090442624   |
| 12 | 3 | 11.750 | -0.0047055378677990   |
| 12 | 3 | 12.000 | -0.0000382739041227   |
| 12 | 3 | 12.250 | 0.0038245849722692    |
| 12 | 3 | 12.500 | 0.0040546086068904    |
| 12 | 3 | 12.750 | 0.0022945243203245    |
| 12 | 3 | 13.000 | 0.0001891708998544    |
| 12 | 3 | 13.250 | -0.0009502213845271   |
| 12 | 3 | 13.500 | -0.0011316390147498   |
| 12 | 3 | 13.750 | -0.0006908560604923   |
| 12 | 3 | 14.000 | 0.0000371084953388    |
| 12 | 3 | 14.250 | 0.0007589470621054    |
| 12 | 3 | 14.500 | 0.0013491296056407    |
| 12 | 3 | 14.750 | 0.0017242701244713    |
| 12 | 3 | 15.000 | 0.0018011464967187    |
| 12 | 3 | 15.250 | 0.0015374626620999    |
| 12 | 3 | 15.500 | 0.0010545635711171    |
| 12 | 3 | 15.750 | 0.0005146478986458    |
| 12 | 3 | 16.000 | 0.0000799052712920    |
| 12 | 3 | 16.250 | -0.0001280983904914   |
| 12 | 3 | 16.500 | -0.0001503740491258   |
| 12 | 3 | 16.750 | -0.0000685606407277   |
| 12 | 3 | 17.000 | 0.0000357688074475    |
| 12 | 3 | 17.250 | 0.0000963059148058    |
| 12 | 3 | 17.500 | 0.0001077510903005    |

|    |   |        |                        |
|----|---|--------|------------------------|
| 12 | 3 | 17.750 | 0.0000799739915544     |
| 12 | 3 | 18.000 | 0.0000228102287964     |
| 12 | 3 | 18.250 | -0.0000525928420050    |
| 12 | 3 | 18.500 | -0.0001297865726128    |
| 12 | 3 | 18.750 | -0.0001910137350453    |
| 12 | 3 | 19.000 | -0.0002185123233023    |
| 12 | 3 | 19.250 | -0.0002004770889464    |
| 12 | 3 | 19.500 | -0.0001487540652144    |
| 12 | 3 | 19.750 | -0.0000811149242213    |
| 12 | 3 | 20.000 | -0.0000153774733472    |
| 12 | 3 | 20.250 | 0.0000336787762636     |
| 12 | 3 | 20.500 | 0.0000635465012832     |
| 12 | 3 | 20.750 | 0.0000747764008422     |
| 12 | 3 | 21.000 | 0.0000678652881745     |
| 12 | 3 | 21.250 | 0.0000447018628112     |
| 12 | 3 | 21.500 | 0.0000130934374018     |
| 12 | 3 | 21.750 | -0.0000176062180225    |
| 12 | 3 | 22.000 | -0.0000380051944186    |
| 12 | 3 | 22.250 | -0.0000410360972656    |
| 12 | 3 | 22.500 | -0.0000287378940281    |
| 12 | 3 | 22.750 | -0.0000054096596813    |
| 12 | 3 | 23.000 | 0.0000247296705733     |
| 12 | 3 | 23.250 | 0.0000560788663601     |
| 12 | 3 | 23.500 | 0.0000772062232117     |
| 12 | 3 | 23.750 | 0.0000751952495153     |
| 12 | 3 | 24.000 | 0.0000370861967994     |
| 12 | 3 | 24.250 | -0.0000423875224639    |
| 12 | 3 | 24.500 | -0.0001375266151432    |
| 12 | 3 | 24.750 | -0.0002147972166845    |
| 12 | 3 | 25.000 | -0.0002404874426550    |
| 12 | 3 | 25.250 | -0.0001930376912434    |
| 12 | 3 | 25.500 | -0.0001001102573498    |
| 12 | 3 | 25.750 | -0.0000017168102269    |
| 12 | 3 | 26.000 | 0.0000621381865967     |
| 12 | 3 | 26.250 | 0.0000633179095987     |
| 12 | 3 | 26.500 | 0.0000210006422315     |
| 12 | 3 | 26.750 | -0.0000339106299338    |
| 12 | 3 | 27.000 | -0.0000704624202609    |
| 12 | 3 | 27.250 | -0.0000660308545302    |
| 12 | 3 | 27.500 | -0.0000323289894137    |
| 12 | 3 | 27.750 | 0.0000099460199589     |
| 12 | 3 | 28.000 | 0.0000393465635964     |
| 12 | 3 | 28.250 | 0.0000399061462535     |
| 12 | 3 | 28.500 | 0.0000198651061000     |
| 12 | 3 | 28.750 | -0.0000062099494298    |
| 12 | 3 | 29.000 | -0.0000238294731914    |
| 12 | 3 | 29.250 | -0.0000226764854044    |
| 12 | 3 | 29.500 | -0.0000088655054533    |
| 12 | 3 | 29.750 | 0.0000072815056690     |
| 12 | 3 | 30.000 | 0.0000150843650006     |
| 12 | 6 | 4.000  | -4105.0150857600929157 |
| 12 | 6 | 4.250  | -1621.1387477701646276 |
| 12 | 6 | 4.500  | -619.0423264381443005  |
| 12 | 6 | 4.750  | -233.1831863128836630  |
| 12 | 6 | 5.000  | -89.4863953377275720   |
| 12 | 6 | 5.250  | -36.3564762747628265   |
| 12 | 6 | 5.500  | -16.1112963397124531   |
| 12 | 6 | 5.750  | -7.8692029537871804    |
| 12 | 6 | 6.000  | -4.1760869779541281    |
| 12 | 6 | 6.250  | -2.3074873930770536    |
| 12 | 6 | 6.500  | -1.3220332556008998    |
| 12 | 6 | 6.750  | -0.7631229014141354    |
| 12 | 6 | 7.000  | -0.4275977138332436    |
| 12 | 6 | 7.250  | -0.2343017486385008    |
| 12 | 6 | 7.500  | -0.1218813575148019    |
| 12 | 6 | 7.750  | -0.0771734535624446    |
| 12 | 6 | 8.000  | -0.0519687422019146    |
| 12 | 6 | 8.250  | -0.0310149981975343    |
| 12 | 6 | 8.500  | -0.0269063885996204    |
| 12 | 6 | 8.750  | -0.0156848088104837    |
| 12 | 6 | 9.000  | -0.0142180076895428    |
| 12 | 6 | 9.250  | -0.0063457127605169    |
| 12 | 6 | 9.500  | -0.0105306436545440    |
| 12 | 6 | 9.750  | 0.0032778032968288     |
| 12 | 6 | 10.000 | 0.0003418938842952     |
| 12 | 6 | 10.250 | 0.0051190302880801     |
| 12 | 6 | 10.500 | -0.0011276407015366    |
| 12 | 6 | 10.750 | 0.0070353626410657     |
| 12 | 6 | 11.000 | -0.0166214300732719    |
| 12 | 6 | 11.250 | 0.0073103816983116     |
| 12 | 6 | 11.500 | -0.0251946815218380    |
| 12 | 6 | 11.750 | 0.0079549994604973     |
| 12 | 6 | 12.000 | -0.0005022004197963    |
| 12 | 6 | 12.250 | -0.0128307709019615    |
| 12 | 6 | 12.500 | -0.0127975929180386    |
| 12 | 6 | 12.750 | -0.0062570469970775    |
| 12 | 6 | 13.000 | 0.0009259158706820     |
| 12 | 6 | 13.250 | 0.0041739969807915     |
| 12 | 6 | 13.500 | 0.0039803895834636     |
| 12 | 6 | 13.750 | 0.0020952398477854     |
| 12 | 6 | 14.000 | 0.0002630679032039     |
| 12 | 6 | 14.250 | -0.0001791873427910    |
| 12 | 6 | 14.500 | 0.0004798756867990     |
| 12 | 6 | 14.750 | 0.0015460038566437     |
| 12 | 6 | 15.000 | 0.0023257565443580     |

|    |   |        |                       |
|----|---|--------|-----------------------|
| 12 | 6 | 15.250 | 0.0023053652157004    |
| 12 | 6 | 15.500 | 0.0016890006069012    |
| 12 | 6 | 15.750 | 0.0008602998283416    |
| 12 | 6 | 16.000 | 0.0002042159449672    |
| 12 | 6 | 16.250 | 0.0000055804891914    |
| 12 | 6 | 16.500 | 0.0001419357007342    |
| 12 | 6 | 16.750 | 0.0003880866107350    |
| 12 | 6 | 17.000 | 0.0005184475304125    |
| 12 | 6 | 17.250 | 0.0003732234235357    |
| 12 | 6 | 17.500 | 0.0000551911249428    |
| 12 | 6 | 17.750 | -0.0002672082490727   |
| 12 | 6 | 18.000 | -0.0004254234711268   |
| 12 | 6 | 18.250 | -0.0003020996133951   |
| 12 | 6 | 18.500 | 0.0000151707247147    |
| 12 | 6 | 18.750 | 0.0003875893677639    |
| 12 | 6 | 19.000 | 0.0006765597849038    |
| 12 | 6 | 19.250 | 0.0007780315496080    |
| 12 | 6 | 19.500 | 0.0007255705634921    |
| 12 | 6 | 19.750 | 0.0005873637339646    |
| 12 | 6 | 20.000 | 0.0004321362631951    |
| 12 | 6 | 20.250 | 0.0003144322264840    |
| 12 | 6 | 20.500 | 0.0002302880252308    |
| 12 | 6 | 20.750 | 0.0001610374776801    |
| 12 | 6 | 21.000 | 0.0000882589810288    |
| 12 | 6 | 21.250 | 0.0000002358128009    |
| 12 | 6 | 21.500 | -0.0000894980175322   |
| 12 | 6 | 21.750 | -0.0001611917160812   |
| 12 | 6 | 22.000 | -0.0001949581825019   |
| 12 | 6 | 22.250 | -0.0001785520339307   |
| 12 | 6 | 22.500 | -0.0001303861934836   |
| 12 | 6 | 22.750 | -0.0000766173391488   |
| 12 | 6 | 23.000 | -0.0000431523474206   |
| 12 | 6 | 23.250 | -0.0000485949662386   |
| 12 | 6 | 23.500 | -0.0000822206564793   |
| 12 | 6 | 23.750 | -0.0001259529139430   |
| 12 | 6 | 24.000 | -0.0001616384166209   |
| 12 | 6 | 24.250 | -0.0001744959158684   |
| 12 | 6 | 24.500 | -0.0001645750460335   |
| 12 | 6 | 24.750 | -0.0001355758837084   |
| 12 | 6 | 25.000 | -0.0000911753219094   |
| 12 | 6 | 25.250 | -0.0000368610636848   |
| 12 | 6 | 25.500 | 0.0000145799091079    |
| 12 | 6 | 25.750 | 0.0000489637817221    |
| 12 | 6 | 26.000 | 0.0000525354058620    |
| 12 | 6 | 26.250 | 0.0000177547810723    |
| 12 | 6 | 26.500 | -0.0000375621610331   |
| 12 | 6 | 26.750 | -0.0000884836110967   |
| 12 | 6 | 27.000 | -0.0001085536536401   |
| 12 | 6 | 27.250 | -0.0000831097302439   |
| 12 | 6 | 27.500 | -0.0000496626022380   |
| 12 | 6 | 27.750 | -0.0000587486132239   |
| 12 | 6 | 28.000 | -0.0001599157911866   |
| 12 | 6 | 28.250 | -0.0003768477428183   |
| 12 | 6 | 28.500 | -0.0006328859075725   |
| 12 | 6 | 28.750 | -0.0008262570055018   |
| 12 | 6 | 29.000 | -0.0008537430020183   |
| 12 | 6 | 29.250 | -0.0006523317620969   |
| 12 | 6 | 29.500 | -0.0003265972241426   |
| 12 | 6 | 29.750 | -0.0000235640514946   |
| 12 | 6 | 30.000 | 0.0001100306675650    |
| 12 | 9 | 4.000  | 6177.1315652741468512 |
| 12 | 9 | 4.250  | 2427.0030543433981620 |
| 12 | 9 | 4.500  | 920.6501574545975473  |
| 12 | 9 | 4.750  | 344.0455369459016310  |
| 12 | 9 | 5.000  | 130.7426489224003490  |
| 12 | 9 | 5.250  | 52.4778640033377997   |
| 12 | 9 | 5.500  | 22.9314266939302343   |
| 12 | 9 | 5.750  | 11.0470903169387498   |
| 12 | 9 | 6.000  | 5.7391709239230977    |
| 12 | 9 | 6.250  | 3.1479757559472432    |
| 12 | 9 | 6.500  | 1.7214919357752478    |
| 12 | 9 | 6.750  | 0.9661609002894238    |
| 12 | 9 | 7.000  | 0.5133408463474325    |
| 12 | 9 | 7.250  | 0.2805006375896255    |
| 12 | 9 | 7.500  | 0.1469480318119416    |
| 12 | 9 | 7.750  | 0.0856755630680510    |
| 12 | 9 | 8.000  | 0.0542477243588415    |
| 12 | 9 | 8.250  | 0.0390590724767916    |
| 12 | 9 | 8.500  | 0.0328117213084687    |
| 12 | 9 | 8.750  | 0.0253335696257734    |
| 12 | 9 | 9.000  | 0.0149507226159676    |
| 12 | 9 | 9.250  | 0.0219033642584407    |
| 12 | 9 | 9.500  | 0.0218020034688107    |
| 12 | 9 | 9.750  | -0.0000453118552020   |
| 12 | 9 | 10.000 | 0.0060100583038492    |
| 12 | 9 | 10.250 | -0.0048584374775298   |
| 12 | 9 | 10.500 | -0.0048909131739806   |
| 12 | 9 | 10.750 | 0.0072132205426479    |
| 12 | 9 | 11.000 | 0.0178766275760019    |
| 12 | 9 | 11.250 | -0.0101794602343784   |
| 12 | 9 | 11.500 | 0.0151012355667791    |
| 12 | 9 | 11.750 | -0.0260576188354796   |
| 12 | 9 | 12.000 | 0.0000129855000333    |
| 12 | 9 | 12.250 | 0.0245760914894951    |
| 12 | 9 | 12.500 | 0.0254440112167187    |

|    |    |        |                       |
|----|----|--------|-----------------------|
| 12 | 9  | 12.750 | 0.0134546110923020    |
| 12 | 9  | 13.000 | -0.0006350034632489   |
| 12 | 9  | 13.250 | -0.0082568597182492   |
| 12 | 9  | 13.500 | -0.0094316655529456   |
| 12 | 9  | 13.750 | -0.0063156234327575   |
| 12 | 9  | 14.000 | -0.0010521589144732   |
| 12 | 9  | 14.250 | 0.0044517416711183    |
| 12 | 9  | 14.500 | 0.0091846989541379    |
| 12 | 9  | 14.750 | 0.0123520505847624    |
| 12 | 9  | 15.000 | 0.0131506876830326    |
| 12 | 9  | 15.250 | 0.0111330729674738    |
| 12 | 9  | 15.500 | 0.0072964054307139    |
| 12 | 9  | 15.750 | 0.0030000101140549    |
| 12 | 9  | 16.000 | -0.0004027070122184   |
| 12 | 9  | 16.250 | -0.0019152449567573   |
| 12 | 9  | 16.500 | -0.0019337249551868   |
| 12 | 9  | 16.750 | -0.0011975991151117   |
| 12 | 9  | 17.000 | -0.0004444862840517   |
| 12 | 9  | 17.250 | -0.0002402728630167   |
| 12 | 9  | 17.500 | -0.0004627956033935   |
| 12 | 9  | 17.750 | -0.0008177636611248   |
| 12 | 9  | 18.000 | -0.0010115868145925   |
| 12 | 9  | 18.250 | -0.0008331871033464   |
| 12 | 9  | 18.500 | -0.0003995391385654   |
| 12 | 9  | 18.750 | 0.0000909551365988    |
| 12 | 9  | 19.000 | 0.0004404857533236    |
| 12 | 9  | 19.250 | 0.0004980415848526    |
| 12 | 9  | 19.500 | 0.0002975157112062    |
| 12 | 9  | 19.750 | -0.0000816476423240   |
| 12 | 9  | 20.000 | -0.0005607898385235   |
| 12 | 9  | 20.250 | -0.0010613915426732   |
| 12 | 9  | 20.500 | -0.0015030230316536   |
| 12 | 9  | 20.750 | -0.0018045792154246   |
| 12 | 9  | 21.000 | -0.0018848331843327   |
| 12 | 9  | 21.250 | -0.0017001554697574   |
| 12 | 9  | 21.500 | -0.0013553592959724   |
| 12 | 9  | 21.750 | -0.0009921706225469   |
| 12 | 9  | 22.000 | -0.0007519711793956   |
| 12 | 9  | 22.250 | -0.0007361415117511   |
| 12 | 9  | 22.500 | -0.0008868826720447   |
| 12 | 9  | 22.750 | -0.0011068454379996   |
| 12 | 9  | 23.000 | -0.0012987146641448   |
| 12 | 9  | 23.250 | -0.0013850065823305   |
| 12 | 9  | 23.500 | -0.0013666991765400   |
| 12 | 9  | 23.750 | -0.0012643348958572   |
| 12 | 9  | 24.000 | -0.0010984158219766   |
| 12 | 9  | 24.250 | -0.0008940282650922   |
| 12 | 9  | 24.500 | -0.0006944212196992   |
| 12 | 9  | 24.750 | -0.0005471166758443   |
| 12 | 9  | 25.000 | -0.0004989895758482   |
| 12 | 9  | 25.250 | -0.0005774590525996   |
| 12 | 9  | 25.500 | -0.00073410666097992  |
| 12 | 9  | 25.750 | -0.0009022675371831   |
| 12 | 9  | 26.000 | -0.0010154960730515   |
| 12 | 9  | 26.250 | -0.0010245244837297   |
| 12 | 9  | 26.500 | -0.0009495764956901   |
| 12 | 9  | 26.750 | -0.0008287365892432   |
| 12 | 9  | 27.000 | -0.0007011255037209   |
| 12 | 9  | 27.250 | -0.0005970707343769   |
| 12 | 9  | 27.500 | -0.0005120666464118   |
| 12 | 9  | 27.750 | -0.0004338009432166   |
| 12 | 9  | 28.000 | -0.0003527041915294   |
| 12 | 9  | 28.250 | -0.0002701687427965   |
| 12 | 9  | 28.500 | -0.0002226519954203   |
| 12 | 9  | 28.750 | -0.0002547600465110   |
| 12 | 9  | 29.000 | -0.0004116655581183   |
| 12 | 9  | 29.250 | -0.0007109546856187   |
| 12 | 9  | 29.500 | -0.0010621567476305   |
| 12 | 9  | 29.750 | -0.0013511732401640   |
| 12 | 9  | 30.000 | -0.0014706943329109   |
| 12 | 12 | 4.000  | 1283.5064077057468239 |
| 12 | 12 | 4.250  | 474.0041654368797026  |
| 12 | 12 | 4.500  | 171.1059147157975531  |
| 12 | 12 | 4.750  | 60.2481628379100584   |
| 12 | 12 | 5.000  | 21.0932402414400713   |
| 12 | 12 | 5.250  | 7.5281689261055362    |
| 12 | 12 | 5.500  | 2.8315085043900581    |
| 12 | 12 | 5.750  | 1.1434439927943458    |
| 12 | 12 | 6.000  | 0.5063956995415992    |
| 12 | 12 | 6.250  | 0.2477249751214003    |
| 12 | 12 | 6.500  | 0.1238031011143335    |
| 12 | 12 | 6.750  | 0.0683287771344361    |
| 12 | 12 | 7.000  | 0.0406727929240454    |
| 12 | 12 | 7.250  | 0.0242243885172506    |
| 12 | 12 | 7.500  | 0.0120814703900152    |
| 12 | 12 | 7.750  | 0.0030416139161602    |
| 12 | 12 | 8.000  | 0.0016826803553656    |
| 12 | 12 | 8.250  | 0.0007320886023052    |
| 12 | 12 | 8.500  | 0.0003798690794810    |
| 12 | 12 | 8.750  | -0.0006220894826257   |
| 12 | 12 | 9.000  | 0.0001743480647072    |
| 12 | 12 | 9.250  | -0.0009551116267730   |
| 12 | 12 | 9.500  | -0.0026431399298090   |
| 12 | 12 | 9.750  | 0.0001934978264551    |
| 12 | 12 | 10.000 | -0.0010482108723444   |

|    |    |        |                       |
|----|----|--------|-----------------------|
| 12 | 12 | 10.250 | -0.0000340502034746   |
| 12 | 12 | 10.500 | -0.0002403609617669   |
| 12 | 12 | 10.750 | -0.0005778869299444   |
| 12 | 12 | 11.000 | 0.0022600117825107    |
| 12 | 12 | 11.250 | -0.0026369248737002   |
| 12 | 12 | 11.500 | -0.0023371114983668   |
| 12 | 12 | 11.750 | 0.0036264536498747    |
| 12 | 12 | 12.000 | -0.0000746715715767   |
| 12 | 12 | 12.250 | -0.0032764467285036   |
| 12 | 12 | 12.500 | -0.0033381513038426   |
| 12 | 12 | 12.750 | -0.0017153155119658   |
| 12 | 12 | 13.000 | 0.0001243294367286    |
| 12 | 12 | 13.250 | 0.0010269019580393    |
| 12 | 12 | 13.500 | 0.0010906006599258    |
| 12 | 12 | 13.750 | 0.0007250796419811    |
| 12 | 12 | 14.000 | 0.0003405988285579    |
| 12 | 12 | 14.250 | 0.0002544665288051    |
| 12 | 12 | 14.500 | 0.0004060582447500    |
| 12 | 12 | 14.750 | 0.0006397766253614    |
| 12 | 12 | 15.000 | 0.0008001672300000    |
| 12 | 12 | 15.250 | 0.0007734401689488    |
| 12 | 12 | 15.500 | 0.0006111813797884    |
| 12 | 12 | 15.750 | 0.0004060459681918    |
| 12 | 12 | 16.000 | 0.0002507716357777    |
| 12 | 12 | 16.250 | 0.0002140145930121    |
| 12 | 12 | 16.500 | 0.0002671821468738    |
| 12 | 12 | 16.750 | 0.0003572054421269    |
| 12 | 12 | 17.000 | 0.0004310391076310    |
| 12 | 12 | 17.250 | 0.0004454994684339    |
| 12 | 12 | 17.500 | 0.0003964741924813    |
| 12 | 12 | 17.750 | 0.0002896554519861    |
| 12 | 12 | 18.000 | 0.0001307815942533    |
| 12 | 12 | 18.250 | -0.0000677575039911   |
| 12 | 12 | 18.500 | -0.0002672277427989   |
| 12 | 12 | 18.750 | -0.0004223567872450   |
| 12 | 12 | 19.000 | -0.0004878617603787   |
| 12 | 12 | 19.250 | -0.0004351962795584   |
| 12 | 12 | 19.500 | -0.0003027267254599   |
| 12 | 12 | 19.750 | -0.0001455146618198   |
| 12 | 12 | 20.000 | -0.0000185176639584   |
| 12 | 12 | 20.250 | 0.0000371394036139    |
| 12 | 12 | 20.500 | 0.0000352847224954    |
| 12 | 12 | 20.750 | 0.0000034510779668    |
| 12 | 12 | 21.000 | -0.0000307991161450   |
| 12 | 12 | 21.250 | -0.0000452675799642   |
| 12 | 12 | 21.500 | -0.0000393045707283   |
| 12 | 12 | 21.750 | -0.0000177180820971   |
| 12 | 12 | 22.000 | 0.0000146861473312    |
| 12 | 12 | 22.250 | 0.0000522641586711    |
| 12 | 12 | 22.500 | 0.0000863988096418    |
| 12 | 12 | 22.750 | 0.0001077651642044    |
| 12 | 12 | 23.000 | 0.0001071005653473    |
| 12 | 12 | 23.250 | 0.0000794690004391    |
| 12 | 12 | 23.500 | 0.0000369885640900    |
| 12 | 12 | 23.750 | -0.0000039681936901   |
| 12 | 12 | 24.000 | -0.0000270155765604   |
| 12 | 12 | 24.250 | -0.0000202833570096   |
| 12 | 12 | 24.500 | 0.0000100815039295    |
| 12 | 12 | 24.750 | 0.0000534165755576    |
| 12 | 12 | 25.000 | 0.0000990899136096    |
| 12 | 12 | 25.250 | 0.0001370719186408    |
| 12 | 12 | 25.500 | 0.0001597369814883    |
| 12 | 12 | 25.750 | 0.0001601381523933    |
| 12 | 12 | 26.000 | 0.0001314846790023    |
| 12 | 12 | 26.250 | 0.0000715466341845    |
| 12 | 12 | 26.500 | -0.0000037330441687   |
| 12 | 12 | 26.750 | -0.0000738272040677   |
| 12 | 12 | 27.000 | -0.0001179508269417   |
| 12 | 12 | 27.250 | -0.0001209040918516   |
| 12 | 12 | 27.500 | -0.0000908624150118   |
| 12 | 12 | 27.750 | -0.0000419994050568   |
| 12 | 12 | 28.000 | 0.0000114282552268    |
| 12 | 12 | 28.250 | 0.0000575813977756    |
| 12 | 12 | 28.500 | 0.0000944201313372    |
| 12 | 12 | 28.750 | 0.0001225446643057    |
| 12 | 12 | 29.000 | 0.0001427995298977    |
| 12 | 12 | 29.250 | 0.0001563616411092    |
| 12 | 12 | 29.500 | 0.0001646522415651    |
| 12 | 12 | 29.750 | 0.0001688845780076    |
| 12 | 12 | 30.000 | 0.0001700750613309    |
| 13 | 0  | 4.000  | -712.6371363678121043 |
| 13 | 0  | 4.250  | -265.8447418226853642 |
| 13 | 0  | 4.500  | -97.2542794299329927  |
| 13 | 0  | 4.750  | -34.7458184896761537  |
| 13 | 0  | 5.000  | -12.3147775642567723  |
| 13 | 0  | 5.250  | -4.4319912266541124   |
| 13 | 0  | 5.500  | -1.6736790830172836   |
| 13 | 0  | 5.750  | -0.6745172597409379   |
| 13 | 0  | 6.000  | -0.2947501329217275   |
| 13 | 0  | 6.250  | -0.1434060935588413   |
| 13 | 0  | 6.500  | -0.0734989449524530   |
| 13 | 0  | 6.750  | -0.0380240693189791   |
| 13 | 0  | 7.000  | -0.0212720723330335   |
| 13 | 0  | 7.250  | -0.0151835218503971   |
| 13 | 0  | 7.500  | -0.0084745956093126   |



|    |   |        |                       |
|----|---|--------|-----------------------|
| 13 | 0 | 7.750  | -0.0058182071363189   |
| 13 | 0 | 8.000  | -0.0045485388495246   |
| 13 | 0 | 8.250  | -0.0033877196629292   |
| 13 | 0 | 8.500  | -0.0027769463502256   |
| 13 | 0 | 8.750  | -0.0025891645805999   |
| 13 | 0 | 9.000  | -0.0014395732040464   |
| 13 | 0 | 9.250  | -0.0001757230144215   |
| 13 | 0 | 9.500  | -0.0008892393544647   |
| 13 | 0 | 9.750  | 0.0002407966452722    |
| 13 | 0 | 10.000 | 0.0004057776777960    |
| 13 | 0 | 10.250 | 0.0001687206461499    |
| 13 | 0 | 10.500 | 0.0003739291552396    |
| 13 | 0 | 10.750 | -0.0011738378895531   |
| 13 | 0 | 11.000 | 0.0040310359731206    |
| 13 | 0 | 11.250 | 0.0008141159610415    |
| 13 | 0 | 11.500 | -0.0003395720915651   |
| 13 | 0 | 11.750 | -0.0010604329930953   |
| 13 | 0 | 12.000 | 0.0004433385043330    |
| 13 | 0 | 12.250 | 0.0013770518727435    |
| 13 | 0 | 12.500 | 0.0012001945918608    |
| 13 | 0 | 12.750 | 0.0004775223206003    |
| 13 | 0 | 13.000 | -0.0002272508554461   |
| 13 | 0 | 13.250 | -0.0004824564481985   |
| 13 | 0 | 13.500 | -0.0003786761205544   |
| 13 | 0 | 13.750 | -0.0001364242783356   |
| 13 | 0 | 14.000 | 0.0000241544640195    |
| 13 | 0 | 14.250 | -0.0000572498985088   |
| 13 | 0 | 14.500 | -0.0003023890772200   |
| 13 | 0 | 14.750 | -0.0005734281939802   |
| 13 | 0 | 15.000 | -0.0007326207180574   |
| 13 | 0 | 15.250 | -0.0006826418364178   |
| 13 | 0 | 15.500 | -0.0004875246533753   |
| 13 | 0 | 15.750 | -0.0002515865618594   |
| 13 | 0 | 16.000 | -0.0000790537824600   |
| 13 | 0 | 16.250 | -0.0000440854817617   |
| 13 | 0 | 16.500 | -0.0001009395735288   |
| 13 | 0 | 16.750 | -0.0001739493925879   |
| 13 | 0 | 17.000 | -0.0001874984185470   |
| 13 | 0 | 17.250 | -0.0000903877222288   |
| 13 | 0 | 17.500 | 0.0000709796561893    |
| 13 | 0 | 17.750 | 0.0002258188015653    |
| 13 | 0 | 18.000 | 0.0003033406616757    |
| 13 | 0 | 18.250 | 0.0002538174693024    |
| 13 | 0 | 18.500 | 0.000118146635159     |
| 13 | 0 | 18.750 | -0.0000669986602081   |
| 13 | 0 | 19.000 | -0.0002269214380607   |
| 13 | 0 | 19.250 | -0.0003231497345269   |
| 13 | 0 | 19.500 | -0.0003545962579489   |
| 13 | 0 | 19.750 | -0.0003311034345361   |
| 13 | 0 | 20.000 | -0.0002625002271733   |
| 13 | 0 | 20.250 | -0.0001614570136812   |
| 13 | 0 | 20.500 | -0.0000522011572536   |
| 13 | 0 | 20.750 | 0.0000381236917005    |
| 13 | 0 | 21.000 | 0.0000823563548956    |
| 13 | 0 | 21.250 | 0.0000638690265857    |
| 13 | 0 | 21.500 | 0.0000081732385434    |
| 13 | 0 | 21.750 | -0.0000486731841718   |
| 13 | 0 | 22.000 | -0.0000706428343364   |
| 13 | 0 | 22.250 | -0.0000336158701222   |
| 13 | 0 | 22.500 | 0.0000389288205854    |
| 13 | 0 | 22.750 | 0.0001116343725999    |
| 13 | 0 | 23.000 | 0.0001491441251464    |
| 13 | 0 | 23.250 | 0.0001271042532529    |
| 13 | 0 | 23.500 | 0.0000651951743848    |
| 13 | 0 | 23.750 | -0.0000058840950882   |
| 13 | 0 | 24.000 | -0.0000554182083366   |
| 13 | 0 | 24.250 | -0.0000616785411260   |
| 13 | 0 | 24.500 | -0.0000389566705137   |
| 13 | 0 | 24.750 | -0.0000105682653108   |
| 13 | 0 | 25.000 | 0.0000001601032446    |
| 13 | 0 | 25.250 | -0.0000220272656085   |
| 13 | 0 | 25.500 | -0.0000602555100756   |
| 13 | 0 | 25.750 | -0.0000896468200769   |
| 13 | 0 | 26.000 | -0.0000854014216845   |
| 13 | 0 | 26.250 | -0.0000320614112637   |
| 13 | 0 | 26.500 | 0.0000487301006335    |
| 13 | 0 | 26.750 | 0.0001260799025751    |
| 13 | 0 | 27.000 | 0.0001690813930885    |
| 13 | 0 | 27.250 | 0.0001554543460998    |
| 13 | 0 | 27.500 | 0.0000975880620755    |
| 13 | 0 | 27.750 | 0.0000165479850564    |
| 13 | 0 | 28.000 | -0.0000666114633638   |
| 13 | 0 | 28.250 | -0.0001340461569634   |
| 13 | 0 | 28.500 | -0.0001807921390636   |
| 13 | 0 | 28.750 | -0.0002051076514740   |
| 13 | 0 | 29.000 | -0.0002052759278954   |
| 13 | 0 | 29.250 | -0.0001822775260189   |
| 13 | 0 | 29.500 | -0.0001479054362078   |
| 13 | 0 | 29.750 | -0.0001166388109726   |
| 13 | 0 | 30.000 | -0.0001029876348658   |
| 13 | 3 | 4.000  | 1995.1242525054076395 |
| 13 | 3 | 4.250  | 742.3868787753417564  |
| 13 | 3 | 4.500  | 270.1154077221665375  |
| 13 | 3 | 4.750  | 96.3143469974712190   |
| 13 | 3 | 5.000  | 34.3418927317402378   |

|    |   |        |                     |
|----|---|--------|---------------------|
| 13 | 3 | 5.250  | 12.5756895095966499 |
| 13 | 3 | 5.500  | 4.8806242953142736  |
| 13 | 3 | 5.750  | 2.0436697854773342  |
| 13 | 3 | 6.000  | 0.9406612490321749  |
| 13 | 3 | 6.250  | 0.4571334220624266  |
| 13 | 3 | 6.500  | 0.2325640228290382  |
| 13 | 3 | 6.750  | 0.1126120110367594  |
| 13 | 3 | 7.000  | 0.0622002423106476  |
| 13 | 3 | 7.250  | 0.0308121349525408  |
| 13 | 3 | 7.500  | 0.0133515583151365  |
| 13 | 3 | 7.750  | 0.0044912661952141  |
| 13 | 3 | 8.000  | 0.0026201478570944  |
| 13 | 3 | 8.250  | 0.0029176991732909  |
| 13 | 3 | 8.500  | -0.0002480849832620 |
| 13 | 3 | 8.750  | 0.0003578198248015  |
| 13 | 3 | 9.000  | 0.0000568718175393  |
| 13 | 3 | 9.250  | 0.0013717257213721  |
| 13 | 3 | 9.500  | -0.0004207573032965 |
| 13 | 3 | 9.750  | -0.0008648744941433 |
| 13 | 3 | 10.000 | -0.0016794532757476 |
| 13 | 3 | 10.250 | -0.0004997561157550 |
| 13 | 3 | 10.500 | -0.0013214752346061 |
| 13 | 3 | 10.750 | 0.0046285477569747  |
| 13 | 3 | 11.000 | -0.0004777716224753 |
| 13 | 3 | 11.250 | -0.0013051853404151 |
| 13 | 3 | 11.500 | 0.0005855652338985  |
| 13 | 3 | 11.750 | 0.0075967111666898  |
| 13 | 3 | 12.000 | 0.0001283541260314  |
| 13 | 3 | 12.250 | -0.0056132582281419 |
| 13 | 3 | 12.500 | -0.0058123821174367 |
| 13 | 3 | 12.750 | -0.0030233486852504 |
| 13 | 3 | 13.000 | 0.0002002053734227  |
| 13 | 3 | 13.250 | 0.0018301268172778  |
| 13 | 3 | 13.500 | 0.0019539971495359  |
| 13 | 3 | 13.750 | 0.0011900627583469  |
| 13 | 3 | 14.000 | 0.0001571919689168  |
| 13 | 3 | 14.250 | -0.0006344887054803 |
| 13 | 3 | 14.500 | -0.0011092245416867 |
| 13 | 3 | 14.750 | -0.0012997955118713 |
| 13 | 3 | 15.000 | -0.0012390584102202 |
| 13 | 3 | 15.250 | -0.0009713788624366 |
| 13 | 3 | 15.500 | -0.0005866421598391 |
| 13 | 3 | 15.750 | -0.0001860715116737 |
| 13 | 3 | 16.000 | 0.0001291606629940  |
| 13 | 3 | 16.250 | 0.0002835281349144  |
| 13 | 3 | 16.500 | 0.0003043030690434  |
| 13 | 3 | 16.750 | 0.0002444387682570  |
| 13 | 3 | 17.000 | 0.0001568769284885  |
| 13 | 3 | 17.250 | 0.0000862551083497  |
| 13 | 3 | 17.500 | 0.0000440654317829  |
| 13 | 3 | 17.750 | 0.0000335267554414  |
| 13 | 3 | 18.000 | 0.0000578753964505  |
| 13 | 3 | 18.250 | 0.0001154244062450  |
| 13 | 3 | 18.500 | 0.0001847577063204  |
| 13 | 3 | 18.750 | 0.0002395235576899  |
| 13 | 3 | 19.000 | 0.0002533551568563  |
| 13 | 3 | 19.250 | 0.0002093248540699  |
| 13 | 3 | 19.500 | 0.0001284268164602  |
| 13 | 3 | 19.750 | 0.0000411750855652  |
| 13 | 3 | 20.000 | -0.0000218650415519 |
| 13 | 3 | 20.250 | -0.0000386784679905 |
| 13 | 3 | 20.500 | -0.0000216513926346 |
| 13 | 3 | 20.750 | 0.0000082273733438  |
| 13 | 3 | 21.000 | 0.0000299453181977  |
| 13 | 3 | 21.250 | 0.0000288441932586  |
| 13 | 3 | 21.500 | 0.0000154599605179  |
| 13 | 3 | 21.750 | 0.0000065732833811  |
| 13 | 3 | 22.000 | 0.0000189153138522  |
| 13 | 3 | 22.250 | 0.0000628500556901  |
| 13 | 3 | 22.500 | 0.0001232420444185  |
| 13 | 3 | 22.750 | 0.0001785238446628  |
| 13 | 3 | 23.000 | 0.0002070106414569  |
| 13 | 3 | 23.250 | 0.0001940478452419  |
| 13 | 3 | 23.500 | 0.0001536292737328  |
| 13 | 3 | 23.750 | 0.0001069624401545  |
| 13 | 3 | 24.000 | 0.0000752368861135  |
| 13 | 3 | 24.250 | 0.0000731809347449  |
| 13 | 3 | 24.500 | 0.0000898158778423  |
| 13 | 3 | 24.750 | 0.0001077103583718  |
| 13 | 3 | 25.000 | 0.0001093497063884  |
| 13 | 3 | 25.250 | 0.0000831517334634  |
| 13 | 3 | 25.500 | 0.0000416147444471  |
| 13 | 3 | 25.750 | 0.0000033755626488  |
| 13 | 3 | 26.000 | -0.0000128532438640 |
| 13 | 3 | 26.250 | 0.0000043893341774  |
| 13 | 3 | 26.500 | 0.0000379461046403  |
| 13 | 3 | 26.750 | 0.0000636576610300  |
| 13 | 3 | 27.000 | 0.0000576638236449  |
| 13 | 3 | 27.250 | 0.0000063337736816  |
| 13 | 3 | 27.500 | -0.0000643722110436 |
| 13 | 3 | 27.750 | -0.0001186879402054 |
| 13 | 3 | 28.000 | -0.0001207919755436 |
| 13 | 3 | 28.250 | -0.0000483814555901 |
| 13 | 3 | 28.500 | 0.0000667821270100  |
| 13 | 3 | 28.750 | 0.0001794893716758  |

|    |   |        |                        |
|----|---|--------|------------------------|
| 13 | 3 | 29.000 | 0.0002447566509197     |
| 13 | 3 | 29.250 | 0.0002324287273632     |
| 13 | 3 | 29.500 | 0.0001707023303460     |
| 13 | 3 | 29.750 | 0.0001022991382210     |
| 13 | 3 | 30.000 | 0.0000699829612343     |
| 13 | 6 | 4.000  | -2258.5926928760818555 |
| 13 | 6 | 4.250  | -803.9794490562958345  |
| 13 | 6 | 4.500  | -281.9291793173101723  |
| 13 | 6 | 4.750  | -96.6967099609491925   |
| 13 | 6 | 5.000  | -32.9482503544029441   |
| 13 | 6 | 5.250  | -11.3590641360317477   |
| 13 | 6 | 5.500  | -4.0909209368151096    |
| 13 | 6 | 5.750  | -1.5382088153886571    |
| 13 | 6 | 6.000  | -0.644986852262250     |
| 13 | 6 | 6.250  | -0.2756665274932857    |
| 13 | 6 | 6.500  | -0.0833702516991650    |
| 13 | 6 | 6.750  | 0.0379939072742843     |
| 13 | 6 | 7.000  | 0.0416626802987849     |
| 13 | 6 | 7.250  | 0.0576370187513646     |
| 13 | 6 | 7.500  | 0.0480613640662142     |
| 13 | 6 | 7.750  | 0.0519971442182037     |
| 13 | 6 | 8.000  | 0.0413513029289607     |
| 13 | 6 | 8.250  | 0.0354763653307455     |
| 13 | 6 | 8.500  | 0.0184007516917862     |
| 13 | 6 | 8.750  | 0.0118708019481739     |
| 13 | 6 | 9.000  | 0.0101532230929213     |
| 13 | 6 | 9.250  | 0.0014998795253611     |
| 13 | 6 | 9.500  | 0.0080275200103310     |
| 13 | 6 | 9.750  | 0.0028041253214253     |
| 13 | 6 | 10.000 | 0.0065772896176182     |
| 13 | 6 | 10.250 | 0.0016603758151728     |
| 13 | 6 | 10.500 | -0.0005820561578594    |
| 13 | 6 | 10.750 | 0.0070359675070082     |
| 13 | 6 | 11.000 | -0.0159610606826441    |
| 13 | 6 | 11.250 | -0.0043451863783811    |
| 13 | 6 | 11.500 | 0.0287972423891017     |
| 13 | 6 | 11.750 | -0.0150129948984872    |
| 13 | 6 | 12.000 | -0.0002910417451640    |
| 13 | 6 | 12.250 | 0.0175979168503800     |
| 13 | 6 | 12.500 | 0.0185036437919888     |
| 13 | 6 | 12.750 | 0.0102139712299292     |
| 13 | 6 | 13.000 | 0.0005253074595156     |
| 13 | 6 | 13.250 | -0.0044035393860037    |
| 13 | 6 | 13.500 | -0.0048980743366356    |
| 13 | 6 | 13.750 | -0.0028964616477951    |
| 13 | 6 | 14.000 | -0.0003323987243940    |
| 13 | 6 | 14.250 | 0.0012430628266131     |
| 13 | 6 | 14.500 | 0.0018057613177955     |
| 13 | 6 | 14.750 | 0.0017135997068504     |
| 13 | 6 | 15.000 | 0.0013251130688376     |
| 13 | 6 | 15.250 | 0.0009408853879056     |
| 13 | 6 | 15.500 | 0.0006258257056056     |
| 13 | 6 | 15.750 | 0.0003850237005395     |
| 13 | 6 | 16.000 | 0.0002223131994676     |
| 13 | 6 | 16.250 | 0.0001356370674779     |
| 13 | 6 | 16.500 | 0.0001048714250507     |
| 13 | 6 | 16.750 | 0.0001061553723964     |
| 13 | 6 | 17.000 | 0.0001160238952332     |
| 13 | 6 | 17.250 | 0.0001139280283654     |
| 13 | 6 | 17.500 | 0.0000899229138229     |
| 13 | 6 | 17.750 | 0.0000366114939426     |
| 13 | 6 | 18.000 | -0.0000536165590774    |
| 13 | 6 | 18.250 | -0.0001814133181912    |
| 13 | 6 | 18.500 | -0.0003187345842619    |
| 13 | 6 | 18.750 | -0.0004301854779935    |
| 13 | 6 | 19.000 | -0.0004799858990671    |
| 13 | 6 | 19.250 | -0.0004450422370980    |
| 13 | 6 | 19.500 | -0.0003539912455898    |
| 13 | 6 | 19.750 | -0.0002488173871222    |
| 13 | 6 | 20.000 | -0.0001718965074113    |
| 13 | 6 | 20.250 | -0.0001521564077974    |
| 13 | 6 | 20.500 | -0.0001642462462650    |
| 13 | 6 | 20.750 | -0.0001690970171034    |
| 13 | 6 | 21.000 | -0.0001280852808974    |
| 13 | 6 | 21.250 | -0.0000183823419428    |
| 13 | 6 | 21.500 | 0.0001214422597306     |
| 13 | 6 | 21.750 | 0.0002378808146317     |
| 13 | 6 | 22.000 | 0.0002776191455893     |
| 13 | 6 | 22.250 | 0.0002069614097401     |
| 13 | 6 | 22.500 | 0.0000700177272364     |
| 13 | 6 | 22.750 | -0.0000695851186959    |
| 13 | 6 | 23.000 | -0.0001481222550937    |
| 13 | 6 | 23.250 | -0.0001223983311337    |
| 13 | 6 | 23.500 | -0.0000325908160557    |
| 13 | 6 | 23.750 | 0.0000598167818402     |
| 13 | 6 | 24.000 | 0.0000930347224257     |
| 13 | 6 | 24.250 | 0.0000244055613894     |
| 13 | 6 | 24.500 | -0.000112326262170     |
| 13 | 6 | 24.750 | -0.0002596660345268    |
| 13 | 6 | 25.000 | -0.0003669482193905    |
| 13 | 6 | 25.250 | -0.0003926416079114    |
| 13 | 6 | 25.500 | -0.0003493523969168    |
| 13 | 6 | 25.750 | -0.0002631269866243    |
| 13 | 6 | 26.000 | -0.0001607231763459    |
| 13 | 6 | 26.250 | -0.0000658745522097    |

|    |   |        |                       |
|----|---|--------|-----------------------|
| 13 | 6 | 26.500 | 0.0000135903577209    |
| 13 | 6 | 26.750 | 0.0000744623514674    |
| 13 | 6 | 27.000 | 0.0001139832357218    |
| 13 | 6 | 27.250 | 0.0001329329809752    |
| 13 | 6 | 27.500 | 0.0001459886053547    |
| 13 | 6 | 27.750 | 0.0001717391961777    |
| 13 | 6 | 28.000 | 0.0002296218990736    |
| 13 | 6 | 28.250 | 0.0003302448367199    |
| 13 | 6 | 28.500 | 0.0004460844753759    |
| 13 | 6 | 28.750 | 0.0005397596409112    |
| 13 | 6 | 29.000 | 0.0005741127956520    |
| 13 | 6 | 29.250 | 0.0005268286511917    |
| 13 | 6 | 29.500 | 0.0004325931731081    |
| 13 | 6 | 29.750 | 0.0003402657030436    |
| 13 | 6 | 30.000 | 0.0002986337824979    |
| 13 | 9 | 4.000  | 1436.2695084041333757 |
| 13 | 9 | 4.250  | 447.3723735296243831  |
| 13 | 9 | 4.500  | 139.8365877457727038  |
| 13 | 9 | 4.750  | 41.4030614118278208   |
| 13 | 9 | 5.000  | 11.1714306525013853   |
| 13 | 9 | 5.250  | 2.3331361756412434    |
| 13 | 9 | 5.500  | 0.0025155626960895    |
| 13 | 9 | 5.750  | -0.5083290651523384   |
| 13 | 9 | 6.000  | -0.4699203670116603   |
| 13 | 9 | 6.250  | -0.3005124821908112   |
| 13 | 9 | 6.500  | -0.2081201727078223   |
| 13 | 9 | 6.750  | -0.1566005394689114   |
| 13 | 9 | 7.000  | -0.0907488252069442   |
| 13 | 9 | 7.250  | -0.0645832373551940   |
| 13 | 9 | 7.500  | -0.0628888699564953   |
| 13 | 9 | 7.750  | -0.0606596925821812   |
| 13 | 9 | 8.000  | -0.0452744277783701   |
| 13 | 9 | 8.250  | -0.0408424232369615   |
| 13 | 9 | 8.500  | -0.0290661976257217   |
| 13 | 9 | 8.750  | -0.0199007765414714   |
| 13 | 9 | 9.000  | -0.0160266429426024   |
| 13 | 9 | 9.250  | -0.0188935038119755   |
| 13 | 9 | 9.500  | -0.0043307706525351   |
| 13 | 9 | 9.750  | -0.0182288111560909   |
| 13 | 9 | 10.000 | -0.0132431112460369   |
| 13 | 9 | 10.250 | -0.0117504029143829   |
| 13 | 9 | 10.500 | -0.0106349961118593   |
| 13 | 9 | 10.750 | -0.0075402552725172   |
| 13 | 9 | 11.000 | -0.0143961744260976   |
| 13 | 9 | 11.250 | -0.0022830474572364   |
| 13 | 9 | 11.500 | -0.0369859089547531   |
| 13 | 9 | 11.750 | 0.0399595161473651    |
| 13 | 9 | 12.000 | -0.0000322407477302   |
| 13 | 9 | 12.250 | -0.0395501272263437   |
| 13 | 9 | 12.500 | -0.0411731020801017   |
| 13 | 9 | 12.750 | -0.0223203582343499   |
| 13 | 9 | 13.000 | -0.0003137755872569   |
| 13 | 9 | 13.250 | 0.0111158123958360    |
| 13 | 9 | 13.500 | 0.0123609573821267    |
| 13 | 9 | 13.750 | 0.0073277124463291    |
| 13 | 9 | 14.000 | -0.0000955853671694   |
| 13 | 9 | 14.250 | -0.0066246789666850   |
| 13 | 9 | 14.500 | -0.0113267941487312   |
| 13 | 9 | 14.750 | -0.0138498444452355   |
| 13 | 9 | 15.000 | -0.0138330685260295   |
| 13 | 9 | 15.250 | -0.0112007060535682   |
| 13 | 9 | 15.500 | -0.0070389843763715   |
| 13 | 9 | 15.750 | -0.0027246370555209   |
| 13 | 9 | 16.000 | 0.0003732360338567    |
| 13 | 9 | 16.250 | 0.0012669927127050    |
| 13 | 9 | 16.500 | 0.0004555240056042    |
| 13 | 9 | 16.750 | -0.0011962705597700   |
| 13 | 9 | 17.000 | -0.0028257910357405   |
| 13 | 9 | 17.250 | -0.0037405616811893   |
| 13 | 9 | 17.500 | -0.0039294141436296   |
| 13 | 9 | 17.750 | -0.0035514847470407   |
| 13 | 9 | 18.000 | -0.0027652817472879   |
| 13 | 9 | 18.250 | -0.0017441659373076   |
| 13 | 9 | 18.500 | -0.0007229443226889   |
| 13 | 9 | 18.750 | 0.0000474056529047    |
| 13 | 9 | 19.000 | 0.0003151910927157    |
| 13 | 9 | 19.250 | -0.0000703870389057   |
| 13 | 9 | 19.500 | -0.0008545165165130   |
| 13 | 9 | 19.750 | -0.0016803979726251   |
| 13 | 9 | 20.000 | -0.0021908875091456   |
| 13 | 9 | 20.250 | -0.0021307542646475   |
| 13 | 9 | 20.500 | -0.0016540424386565   |
| 13 | 9 | 20.750 | -0.0010172354884772   |
| 13 | 9 | 21.000 | -0.0004768747241731   |
| 13 | 9 | 21.250 | -0.0002319505206135   |
| 13 | 9 | 21.500 | -0.0002519068101744   |
| 13 | 9 | 21.750 | -0.0004488934398567   |
| 13 | 9 | 22.000 | -0.0007346820230612   |
| 13 | 9 | 22.250 | -0.0010268304299517   |
| 13 | 9 | 22.500 | -0.0012681442341754   |
| 13 | 9 | 22.750 | -0.0014080307775130   |
| 13 | 9 | 23.000 | -0.0013965784235390   |
| 13 | 9 | 23.250 | -0.0012098470385809   |
| 13 | 9 | 23.500 | -0.0009250822601804   |
| 13 | 9 | 23.750 | -0.0006442921460793   |

|    |    |        |                        |
|----|----|--------|------------------------|
| 13 | 9  | 24.000 | -0.0004690190646338    |
| 13 | 9  | 24.250 | -0.0004721603711209    |
| 13 | 9  | 24.500 | -0.0006124529408950    |
| 13 | 9  | 24.750 | -0.0008200443262295    |
| 13 | 9  | 25.000 | -0.0010242498482920    |
| 13 | 9  | 25.250 | -0.0011668524846963    |
| 13 | 9  | 25.500 | -0.0012418841783433    |
| 13 | 9  | 25.750 | -0.0012568065883688    |
| 13 | 9  | 26.000 | -0.0012189526133787    |
| 13 | 9  | 26.250 | -0.0011395877879662    |
| 13 | 9  | 26.500 | -0.0010480975111168    |
| 13 | 9  | 26.750 | -0.0009788018171233    |
| 13 | 9  | 27.000 | -0.0009665628081626    |
| 13 | 9  | 27.250 | -0.0010315584250036    |
| 13 | 9  | 27.500 | -0.0011326042631069    |
| 13 | 9  | 27.750 | -0.0012131580561829    |
| 13 | 9  | 28.000 | -0.0012165428710312    |
| 13 | 9  | 28.250 | -0.0011078461845545    |
| 13 | 9  | 28.500 | -0.0009380845430985    |
| 13 | 9  | 28.750 | -0.0007805169479955    |
| 13 | 9  | 29.000 | -0.0007090899418219    |
| 13 | 9  | 29.250 | -0.0007714710451330    |
| 13 | 9  | 29.500 | -0.0009120681048675    |
| 13 | 9  | 29.750 | -0.0010512062333278    |
| 13 | 9  | 30.000 | -0.0011137649415059    |
| 13 | 12 | 4.000  | -3425.2212933915143367 |
| 13 | 12 | 4.250  | -1256.7280045449660975 |
| 13 | 12 | 4.500  | -451.7843281334135099  |
| 13 | 12 | 4.750  | -158.1138678176703252  |
| 13 | 12 | 5.000  | -54.7354680949119938   |
| 13 | 12 | 5.250  | -19.1465240404349970   |
| 13 | 12 | 5.500  | -6.9776813102630513    |
| 13 | 12 | 5.750  | -2.6951672632735608    |
| 13 | 12 | 6.000  | -1.1460190788563978    |
| 13 | 12 | 6.250  | -0.5230797967331000    |
| 13 | 12 | 6.500  | -0.2537390239693949    |
| 13 | 12 | 6.750  | -0.1255638596620940    |
| 13 | 12 | 7.000  | -0.0704110876005828    |
| 13 | 12 | 7.250  | -0.0384020569962615    |
| 13 | 12 | 7.500  | -0.0153410383953343    |
| 13 | 12 | 7.750  | 0.0068592657758924     |
| 13 | 12 | 8.000  | 0.0013347943790993     |
| 13 | 12 | 8.250  | 0.0015252526299085     |
| 13 | 12 | 8.500  | 0.0023814705488698     |
| 13 | 12 | 8.750  | -0.0021839761124243    |
| 13 | 12 | 9.000  | -0.0003315713268686    |
| 13 | 12 | 9.250  | 0.0050271068569456     |
| 13 | 12 | 9.500  | -0.0048335655900411    |
| 13 | 12 | 9.750  | 0.0017614999064159     |
| 13 | 12 | 10.000 | 0.0044148875352787     |
| 13 | 12 | 10.250 | 0.0017499371598495     |
| 13 | 12 | 10.500 | -0.0008326135711578    |
| 13 | 12 | 10.750 | -0.0079837921052706    |
| 13 | 12 | 11.000 | 0.0154684364790820     |
| 13 | 12 | 11.250 | 0.0053835034821041     |
| 13 | 12 | 11.500 | 0.0183271099292923     |
| 13 | 12 | 11.750 | -0.0091017911031632    |
| 13 | 12 | 12.000 | -0.0002575629167669    |
| 13 | 12 | 12.250 | 0.0107465868376022     |
| 13 | 12 | 12.500 | 0.0113115848344369     |
| 13 | 12 | 12.750 | 0.0061851144885743     |
| 13 | 12 | 13.000 | 0.0001424239574528     |
| 13 | 12 | 13.250 | -0.0030461323298486    |
| 13 | 12 | 13.500 | -0.0035833535943105    |
| 13 | 12 | 13.750 | -0.0026568390731015    |
| 13 | 12 | 14.000 | -0.0014532897053767    |
| 13 | 12 | 14.250 | -0.0009104301196733    |
| 13 | 12 | 14.500 | -0.0009571350442940    |
| 13 | 12 | 14.750 | -0.0012688087108265    |
| 13 | 12 | 15.000 | -0.0015206137690605    |
| 13 | 12 | 15.250 | -0.0014653006380279    |
| 13 | 12 | 15.500 | -0.0011633592068701    |
| 13 | 12 | 15.750 | -0.0007513797735563    |
| 13 | 12 | 16.000 | -0.0003648781921819    |
| 13 | 12 | 16.250 | -0.0001093068964600    |
| 13 | 12 | 16.500 | 0.0000262413252007     |
| 13 | 12 | 16.750 | 0.0000815811066983     |
| 13 | 12 | 17.000 | 0.0000965271131281     |
| 13 | 12 | 17.250 | 0.0001028767935717     |
| 13 | 12 | 17.500 | 0.0001002740332279     |
| 13 | 12 | 17.750 | 0.0000800979721787     |
| 13 | 12 | 18.000 | 0.0000337522668919     |
| 13 | 12 | 18.250 | -0.0000399060959919    |
| 13 | 12 | 18.500 | -0.0001121712427192    |
| 13 | 12 | 18.750 | -0.0001467620987111    |
| 13 | 12 | 19.000 | -0.0001069958705504    |
| 13 | 12 | 19.250 | 0.0000257566521315     |
| 13 | 12 | 19.500 | 0.0001960666071840     |
| 13 | 12 | 19.750 | 0.0003297084858303     |
| 13 | 12 | 20.000 | 0.0003524192392666     |
| 13 | 12 | 20.250 | 0.0002168565995613     |
| 13 | 12 | 20.500 | -0.0000166205817708    |
| 13 | 12 | 20.750 | -0.0002608590928336    |
| 13 | 12 | 21.000 | -0.0004287185286197    |
| 13 | 12 | 21.250 | -0.0004577875926365    |

|    |    |        |                      |
|----|----|--------|----------------------|
| 13 | 12 | 21.500 | -0.0003841114231825  |
| 13 | 12 | 21.750 | -0.0002683850137778  |
| 13 | 12 | 22.000 | -0.0001714963974527  |
| 13 | 12 | 22.250 | -0.0001394004080401  |
| 13 | 12 | 22.500 | -0.0001576675279570  |
| 13 | 12 | 22.750 | -0.0001966307619545  |
| 13 | 12 | 23.000 | -0.0002265899485291  |
| 13 | 12 | 23.250 | -0.0002251792772978  |
| 13 | 12 | 23.500 | -0.0001997187692010  |
| 13 | 12 | 23.750 | -0.0001648961961816  |
| 13 | 12 | 24.000 | -0.0001353878181968  |
| 13 | 12 | 24.250 | -0.0001223495817034  |
| 13 | 12 | 24.500 | -0.0001235241382418  |
| 13 | 12 | 24.750 | -0.0001335003677634  |
| 13 | 12 | 25.000 | -0.0001472260017371  |
| 13 | 12 | 25.250 | -0.0001599755665046  |
| 13 | 12 | 25.500 | -0.0001676128759704  |
| 13 | 12 | 25.750 | -0.0001660479542298  |
| 13 | 12 | 26.000 | -0.0001512764885026  |
| 13 | 12 | 26.250 | -0.0001218836935551  |
| 13 | 12 | 26.500 | -0.0000855368799836  |
| 13 | 12 | 26.750 | -0.0000519676543275  |
| 13 | 12 | 27.000 | -0.0000307404441930  |
| 13 | 12 | 27.250 | -0.0000285957710780  |
| 13 | 12 | 27.500 | -0.0000401084504079  |
| 13 | 12 | 27.750 | -0.0000561005985196  |
| 13 | 12 | 28.000 | -0.0000665270803459  |
| 13 | 12 | 28.250 | -0.0000650791100295  |
| 13 | 12 | 28.500 | -0.0000613691455752  |
| 13 | 12 | 28.750 | -0.0000684339699611  |
| 13 | 12 | 29.000 | -0.0000975958165003  |
| 13 | 12 | 29.250 | -0.0001536883677778  |
| 13 | 12 | 29.500 | -0.0002207753420529  |
| 13 | 12 | 29.750 | -0.0002777330824980  |
| 13 | 12 | 30.000 | -0.0003019594911572  |
| 14 | 0  | 4.000  | -81.1093538951245137 |
| 14 | 0  | 4.250  | -27.8159470385526220 |
| 14 | 0  | 4.500  | -9.2869045624738646  |
| 14 | 0  | 4.750  | -3.0710454466088777  |
| 14 | 0  | 5.000  | -1.0371500734495385  |
| 14 | 0  | 5.250  | -0.3787731808927219  |
| 14 | 0  | 5.500  | -0.1580893706025108  |
| 14 | 0  | 5.750  | -0.0759407132112528  |
| 14 | 0  | 6.000  | -0.0418614717762580  |
| 14 | 0  | 6.250  | -0.0270536435156430  |
| 14 | 0  | 6.500  | -0.0151318470893642  |
| 14 | 0  | 6.750  | -0.0058015362457695  |
| 14 | 0  | 7.000  | -0.0008579029447784  |
| 14 | 0  | 7.250  | -0.0030858685338782  |
| 14 | 0  | 7.500  | -0.0022671114983908  |
| 14 | 0  | 7.750  | -0.0005327919992375  |
| 14 | 0  | 8.000  | -0.0005465698580096  |
| 14 | 0  | 8.250  | 0.0000660000512553   |
| 14 | 0  | 8.500  | 0.0005346128180967   |
| 14 | 0  | 8.750  | 0.0011643153276246   |
| 14 | 0  | 9.000  | 0.0004391814666498   |
| 14 | 0  | 9.250  | 0.0016486190186242   |
| 14 | 0  | 9.500  | 0.0016473449154830   |
| 14 | 0  | 9.750  | 0.0006989366038770   |
| 14 | 0  | 10.000 | 0.0002861846198758   |
| 14 | 0  | 10.250 | 0.0004383997326585   |
| 14 | 0  | 10.500 | 0.0004490689561543   |
| 14 | 0  | 10.750 | -0.0018200588800488  |
| 14 | 0  | 11.000 | 0.0049603075560443   |
| 14 | 0  | 11.250 | 0.0012794873485413   |
| 14 | 0  | 11.500 | -0.0019275574761082  |
| 14 | 0  | 11.750 | 0.0005507124368149   |
| 14 | 0  | 12.000 | -0.0000844456068929  |
| 14 | 0  | 12.250 | -0.0009252833149205  |
| 14 | 0  | 12.500 | -0.0008789340121940  |
| 14 | 0  | 12.750 | -0.0003667906493900  |
| 14 | 0  | 13.000 | 0.0001890369538322   |
| 14 | 0  | 13.250 | 0.0004565883087551   |
| 14 | 0  | 13.500 | 0.0004567986148758   |
| 14 | 0  | 13.750 | 0.0002978042288961   |
| 14 | 0  | 14.000 | 0.0000873702445858   |
| 14 | 0  | 14.250 | -0.0000854188302555  |
| 14 | 0  | 14.500 | -0.0002062839309844  |
| 14 | 0  | 14.750 | -0.0002796726581105  |
| 14 | 0  | 15.000 | -0.0003099635998212  |
| 14 | 0  | 15.250 | -0.0003033580661370  |
| 14 | 0  | 15.500 | -0.0002739134267696  |
| 14 | 0  | 15.750 | -0.0002377248701471  |
| 14 | 0  | 16.000 | -0.0002109866417189  |
| 14 | 0  | 16.250 | -0.0002052096290811  |
| 14 | 0  | 16.500 | -0.0002128449669592  |
| 14 | 0  | 16.750 | -0.0002215407937839  |
| 14 | 0  | 17.000 | -0.0002189082057500  |
| 14 | 0  | 17.250 | -0.0001967488944448  |
| 14 | 0  | 17.500 | -0.0001636764728129  |
| 14 | 0  | 17.750 | -0.0001324965230624  |
| 14 | 0  | 18.000 | -0.0001160023952315  |
| 14 | 0  | 18.250 | -0.0001217141218859  |
| 14 | 0  | 18.500 | -0.0001361444190538  |
| 14 | 0  | 18.750 | -0.0001405654683437  |

|    |   |        |                        |
|----|---|--------|------------------------|
| 14 | 0 | 19.000 | -0.0001162539946922    |
| 14 | 0 | 19.250 | -0.0000525176747605    |
| 14 | 0 | 19.500 | 0.0000292314907324     |
| 14 | 0 | 19.750 | 0.0000995577439336     |
| 14 | 0 | 20.000 | 0.0001290322170473     |
| 14 | 0 | 20.250 | 0.0000990975155822     |
| 14 | 0 | 20.500 | 0.0000346246993151     |
| 14 | 0 | 20.750 | -0.0000286597984984    |
| 14 | 0 | 21.000 | -0.0000550390577125    |
| 14 | 0 | 21.250 | -0.0000202188949402    |
| 14 | 0 | 21.500 | 0.0000543420132424     |
| 14 | 0 | 21.750 | 0.0001357449861682     |
| 14 | 0 | 22.000 | 0.0001911015786982     |
| 14 | 0 | 22.250 | 0.0001958395361234     |
| 14 | 0 | 22.500 | 0.0001587794807336     |
| 14 | 0 | 22.750 | 0.0000970991137394     |
| 14 | 0 | 23.000 | 0.0000280167796175     |
| 14 | 0 | 23.250 | -0.0000332980525939    |
| 14 | 0 | 23.500 | -0.0000799408927941    |
| 14 | 0 | 23.750 | -0.0001070978739925    |
| 14 | 0 | 24.000 | -0.0001099459021286    |
| 14 | 0 | 24.250 | -0.0000862279143707    |
| 14 | 0 | 24.500 | -0.0000440362921884    |
| 14 | 0 | 24.750 | 0.0000059230628148     |
| 14 | 0 | 25.000 | 0.0000529148661461     |
| 14 | 0 | 25.250 | 0.0000877810471957     |
| 14 | 0 | 25.500 | 0.0001078233128131     |
| 14 | 0 | 25.750 | 0.0001119920371628     |
| 14 | 0 | 26.000 | 0.0000992371062414     |
| 14 | 0 | 26.250 | 0.0000709326207395     |
| 14 | 0 | 26.500 | 0.0000382088045159     |
| 14 | 0 | 26.750 | 0.0000146725876703     |
| 14 | 0 | 27.000 | 0.0000140078094120     |
| 14 | 0 | 27.250 | 0.0000433113355248     |
| 14 | 0 | 27.500 | 0.0000831674947934     |
| 14 | 0 | 27.750 | 0.0001075433179093     |
| 14 | 0 | 28.000 | 0.0000904967490755     |
| 14 | 0 | 28.250 | 0.0000173396015845     |
| 14 | 0 | 28.500 | -0.0000819169312791    |
| 14 | 0 | 28.750 | -0.0001661378731142    |
| 14 | 0 | 29.000 | -0.0001941811900600    |
| 14 | 0 | 29.250 | -0.0001401013455848    |
| 14 | 0 | 29.500 | -0.0000390017042852    |
| 14 | 0 | 29.750 | 0.0000586926911688     |
| 14 | 0 | 30.000 | 0.0001024829197153     |
| 14 | 3 | 4.000  | -1216.3803476669004340 |
| 14 | 3 | 4.250  | -452.0618853502873549  |
| 14 | 3 | 4.500  | -164.7160170982510863  |
| 14 | 3 | 4.750  | -58.4955434577457822   |
| 14 | 3 | 5.000  | -20.5261812677461535   |
| 14 | 3 | 5.250  | -7.2470909260850931    |
| 14 | 3 | 5.500  | -2.6413462971563746    |
| 14 | 3 | 5.750  | -1.0182379899159528    |
| 14 | 3 | 6.000  | -0.4187471324741665    |
| 14 | 3 | 6.250  | -0.1832409034733686    |
| 14 | 3 | 6.500  | -0.0868735320291858    |
| 14 | 3 | 6.750  | -0.0453798600920514    |
| 14 | 3 | 7.000  | -0.0238059893028524    |
| 14 | 3 | 7.250  | -0.0142208551356120    |
| 14 | 3 | 7.500  | -0.0071217714730025    |
| 14 | 3 | 7.750  | -0.0055826528466321    |
| 14 | 3 | 8.000  | -0.0060448449580979    |
| 14 | 3 | 8.250  | -0.0062468605372342    |
| 14 | 3 | 8.500  | -0.0064240927025725    |
| 14 | 3 | 8.750  | -0.0034380199421610    |
| 14 | 3 | 9.000  | -0.0024180923296023    |
| 14 | 3 | 9.250  | -0.0005131084092639    |
| 14 | 3 | 9.500  | -0.0027235080709926    |
| 14 | 3 | 9.750  | -0.0002937036970347    |
| 14 | 3 | 10.000 | 0.0005973164566067     |
| 14 | 3 | 10.250 | 0.0004253927905259     |
| 14 | 3 | 10.500 | -0.0004187469041165    |
| 14 | 3 | 10.750 | -0.0012013480496965    |
| 14 | 3 | 11.000 | -0.0083231420268398    |
| 14 | 3 | 11.250 | 0.0020061140240986     |
| 14 | 3 | 11.500 | 0.0038699351407189     |
| 14 | 3 | 11.750 | -0.0052237298848885    |
| 14 | 3 | 12.000 | 0.0004936137387632     |
| 14 | 3 | 12.250 | 0.0054061554913119     |
| 14 | 3 | 12.500 | 0.0054075806964357     |
| 14 | 3 | 12.750 | 0.0027907213506681     |
| 14 | 3 | 13.000 | -0.0001504126116658    |
| 14 | 3 | 13.250 | -0.0016007637750846    |
| 14 | 3 | 13.500 | -0.0016683225772922    |
| 14 | 3 | 13.750 | -0.0009425596649813    |
| 14 | 3 | 14.000 | -0.0000133834257663    |
| 14 | 3 | 14.250 | 0.0006383403038499     |
| 14 | 3 | 14.500 | 0.0009692135083625     |
| 14 | 3 | 14.750 | 0.0010451859571469     |
| 14 | 3 | 15.000 | 0.0009322291387084     |
| 14 | 3 | 15.250 | 0.0006964375511240     |
| 14 | 3 | 15.500 | 0.0004042891752025     |
| 14 | 3 | 15.750 | 0.0001223818954914     |
| 14 | 3 | 16.000 | -0.0000826965917589    |
| 14 | 3 | 16.250 | -0.0001626119489136    |

|    |   |        |                       |
|----|---|--------|-----------------------|
| 14 | 3 | 16.500 | -0.0001418981712081   |
| 14 | 3 | 16.750 | -0.0000632780404665   |
| 14 | 3 | 17.000 | 0.0000305466568209    |
| 14 | 3 | 17.250 | 0.0001027837941051    |
| 14 | 3 | 17.500 | 0.0001404384687389    |
| 14 | 3 | 17.750 | 0.0001364119421388    |
| 14 | 3 | 18.000 | 0.0000835891225431    |
| 14 | 3 | 18.250 | -0.0000172132428538   |
| 14 | 3 | 18.500 | -0.0001332799764448   |
| 14 | 3 | 18.750 | -0.0002238669562197   |
| 14 | 3 | 19.000 | -0.0002481704167709   |
| 14 | 3 | 19.250 | -0.0001810608951159   |
| 14 | 3 | 19.500 | -0.0000602669241019   |
| 14 | 3 | 19.750 | 0.0000606870906312    |
| 14 | 3 | 20.000 | 0.0001282361438307    |
| 14 | 3 | 20.250 | 0.0001053161268112    |
| 14 | 3 | 20.500 | 0.0000208830297098    |
| 14 | 3 | 20.750 | -0.0000795940169178   |
| 14 | 3 | 21.000 | -0.0001506665084518   |
| 14 | 3 | 21.250 | -0.0001590913995593   |
| 14 | 3 | 21.500 | -0.0001201725323351   |
| 14 | 3 | 21.750 | -0.0000612434781030   |
| 14 | 3 | 22.000 | -0.0000095397948620   |
| 14 | 3 | 22.250 | 0.0000139317688076    |
| 14 | 3 | 22.500 | 0.0000131545690784    |
| 14 | 3 | 22.750 | -0.0000015553478819   |
| 14 | 3 | 23.000 | -0.0000196686181664   |
| 14 | 3 | 23.250 | -0.0000328842257437   |
| 14 | 3 | 23.500 | -0.0000425477726131   |
| 14 | 3 | 23.750 | -0.0000525444791072   |
| 14 | 3 | 24.000 | -0.0000667600634496   |
| 14 | 3 | 24.250 | -0.0000871670878091   |
| 14 | 3 | 24.500 | -0.0001082728864355   |
| 14 | 3 | 24.750 | -0.0001226046491831   |
| 14 | 3 | 25.000 | -0.0001224917187064   |
| 14 | 3 | 25.250 | -0.0001034843750858   |
| 14 | 3 | 25.500 | -0.0000748797719807   |
| 14 | 3 | 25.750 | -0.0000495669385427   |
| 14 | 3 | 26.000 | -0.0000406142706863   |
| 14 | 3 | 26.250 | -0.0000564176240182   |
| 14 | 3 | 26.500 | -0.0000859765232349   |
| 14 | 3 | 26.750 | -0.0001132927639710   |
| 14 | 3 | 27.000 | -0.0001220312221227   |
| 14 | 3 | 27.250 | -0.0001008323012166   |
| 14 | 3 | 27.500 | -0.0000601887554467   |
| 14 | 3 | 27.750 | -0.0000166157146023   |
| 14 | 3 | 28.000 | 0.0000125114947517    |
| 14 | 3 | 28.250 | 0.0000150947059969    |
| 14 | 3 | 28.500 | 0.0000025956102663    |
| 14 | 3 | 28.750 | -0.0000074221439285   |
| 14 | 3 | 29.000 | 0.0000025131995427    |
| 14 | 3 | 29.250 | 0.0000432614543868    |
| 14 | 3 | 29.500 | 0.0000995916036574    |
| 14 | 3 | 29.750 | 0.0001496835274022    |
| 14 | 3 | 30.000 | 0.0001713653616989    |
| 14 | 6 | 4.000  | 3675.7778043400885508 |
| 14 | 6 | 4.250  | 1356.7141855000772921 |
| 14 | 6 | 4.500  | 489.8065794870435639  |
| 14 | 6 | 4.750  | 172.3013044820172581  |
| 14 | 6 | 5.000  | 59.9184994453935360   |
| 14 | 6 | 5.250  | 20.9830878141431185   |
| 14 | 6 | 5.500  | 7.6257631649398263    |
| 14 | 6 | 5.750  | 2.9008438942012162    |
| 14 | 6 | 6.000  | 1.2057371853563836    |
| 14 | 6 | 6.250  | 0.5915648882910176    |
| 14 | 6 | 6.500  | 0.2681368832812723    |
| 14 | 6 | 6.750  | 0.1467313250726612    |
| 14 | 6 | 7.000  | 0.0742598121971412    |
| 14 | 6 | 7.250  | 0.0258803579624924    |
| 14 | 6 | 7.500  | 0.0039657979488368    |
| 14 | 6 | 7.750  | -0.0141147697432866   |
| 14 | 6 | 8.000  | -0.0166966077234534   |
| 14 | 6 | 8.250  | -0.0057474817031000   |
| 14 | 6 | 8.500  | -0.0082421938684014   |
| 14 | 6 | 8.750  | -0.0039725933776040   |
| 14 | 6 | 9.000  | 0.0029708882518875    |
| 14 | 6 | 9.250  | 0.0080360025451842    |
| 14 | 6 | 9.500  | 0.0083407061529481    |
| 14 | 6 | 9.750  | 0.0086220055673909    |
| 14 | 6 | 10.000 | 0.0037714245117382    |
| 14 | 6 | 10.250 | 0.0071547308201847    |
| 14 | 6 | 10.500 | -0.0004518948434065   |
| 14 | 6 | 10.750 | 0.0002188271917660    |
| 14 | 6 | 11.000 | -0.0069863137238588   |
| 14 | 6 | 11.250 | -0.0019962749449220   |
| 14 | 6 | 11.500 | -0.0359885531517561   |
| 14 | 6 | 11.750 | 0.0187739562589577    |
| 14 | 6 | 12.000 | -0.0006863753242632   |
| 14 | 6 | 12.250 | -0.0233171722708514   |
| 14 | 6 | 12.500 | -0.0237968476024752   |
| 14 | 6 | 12.750 | -0.0124896639647316   |
| 14 | 6 | 13.000 | 0.0002412245399463    |
| 14 | 6 | 13.250 | 0.0062582528055430    |
| 14 | 6 | 13.500 | 0.0062851577458263    |
| 14 | 6 | 13.750 | 0.0032560976399731    |



|    |   |        |                        |
|----|---|--------|------------------------|
| 14 | 6 | 14.000 | 0.0001016648872443     |
| 14 | 6 | 14.250 | -0.0009069934176138    |
| 14 | 6 | 14.500 | -0.0001297628216392    |
| 14 | 6 | 14.750 | 0.0014156692199367     |
| 14 | 6 | 15.000 | 0.0027108119568306     |
| 14 | 6 | 15.250 | 0.0029804276908636     |
| 14 | 6 | 15.500 | 0.0024257081217642     |
| 14 | 6 | 15.750 | 0.0014923883450043     |
| 14 | 6 | 16.000 | 0.0006260440551252     |
| 14 | 6 | 16.250 | 0.0001728722485270     |
| 14 | 6 | 16.500 | 0.0000836576139712     |
| 14 | 6 | 16.750 | 0.0002106143773986     |
| 14 | 6 | 17.000 | 0.0004060185212513     |
| 14 | 6 | 17.250 | 0.0005499111869762     |
| 14 | 6 | 17.500 | 0.0006333962014629     |
| 14 | 6 | 17.750 | 0.0006755063360153     |
| 14 | 6 | 18.000 | 0.0006954919554603     |
| 14 | 6 | 18.250 | 0.0007055448861454     |
| 14 | 6 | 18.500 | 0.0006893874978895     |
| 14 | 6 | 18.750 | 0.0006236623151511     |
| 14 | 6 | 19.000 | 0.0004851777392878     |
| 14 | 6 | 19.250 | 0.0002630250017556     |
| 14 | 6 | 19.500 | -0.0000054836656020    |
| 14 | 6 | 19.750 | -0.0002706310569882    |
| 14 | 6 | 20.000 | -0.0004820444715615    |
| 14 | 6 | 20.250 | -0.0006027448564118    |
| 14 | 6 | 20.500 | -0.0006512173347642    |
| 14 | 6 | 20.750 | -0.0006597671972320    |
| 14 | 6 | 21.000 | -0.0006600950833100    |
| 14 | 6 | 21.250 | -0.0006751106422784    |
| 14 | 6 | 21.500 | -0.0006950963052016    |
| 14 | 6 | 21.750 | -0.0007023451824352    |
| 14 | 6 | 22.000 | -0.0006788724460427    |
| 14 | 6 | 22.250 | -0.0006136901932756    |
| 14 | 6 | 22.500 | -0.0005250630144623    |
| 14 | 6 | 22.750 | -0.0004390044492340    |
| 14 | 6 | 23.000 | -0.0003814049210930    |
| 14 | 6 | 23.250 | -0.0003714406810451    |
| 14 | 6 | 23.500 | -0.0004003863355589    |
| 14 | 6 | 23.750 | -0.0004523958424316    |
| 14 | 6 | 24.000 | -0.0005114075064847    |
| 14 | 6 | 24.250 | -0.0005628226803357    |
| 14 | 6 | 24.500 | -0.0005991900347611    |
| 14 | 6 | 24.750 | -0.0006147712778774    |
| 14 | 6 | 25.000 | -0.0006037261090809    |
| 14 | 6 | 25.250 | -0.0005630868679778    |
| 14 | 6 | 25.500 | -0.0005019717572573    |
| 14 | 6 | 25.750 | -0.0004321458152616    |
| 14 | 6 | 26.000 | -0.0003648709498859    |
| 14 | 6 | 26.250 | -0.0003098757028515    |
| 14 | 6 | 26.500 | -0.0002712520740737    |
| 14 | 6 | 26.750 | -0.0002509513955486    |
| 14 | 6 | 27.000 | -0.0002496366511624    |
| 14 | 6 | 27.250 | -0.0002690930976381    |
| 14 | 6 | 27.500 | -0.0003197696089139    |
| 14 | 6 | 27.750 | -0.0004145215660394    |
| 14 | 6 | 28.000 | -0.0005653659896976    |
| 14 | 6 | 28.250 | -0.0007699889793292    |
| 14 | 6 | 28.500 | -0.0009716896836986    |
| 14 | 6 | 28.750 | -0.0011005101604907    |
| 14 | 6 | 29.000 | -0.0010856952560138    |
| 14 | 6 | 29.250 | -0.0008874186943556    |
| 14 | 6 | 29.500 | -0.0005947641311235    |
| 14 | 6 | 29.750 | -0.0003295728589331    |
| 14 | 6 | 30.000 | -0.0002139649048029    |
| 14 | 9 | 4.000  | -5338.7375741170872061 |
| 14 | 9 | 4.250  | -1923.3750896024012036 |
| 14 | 9 | 4.500  | -683.7474864390787843  |
| 14 | 9 | 4.750  | -236.6927429282418416  |
| 14 | 9 | 5.000  | -80.7971669107351431   |
| 14 | 9 | 5.250  | -27.5890357007236418   |
| 14 | 9 | 5.500  | -9.6992990191745463    |
| 14 | 9 | 5.750  | -3.5596682304296792    |
| 14 | 9 | 6.000  | -1.4532047068472593    |
| 14 | 9 | 6.250  | -0.6149146026729113    |
| 14 | 9 | 6.500  | -0.3090624741232659    |
| 14 | 9 | 6.750  | -0.1458104456985723    |
| 14 | 9 | 7.000  | -0.0847495536477822    |
| 14 | 9 | 7.250  | -0.0174696121211468    |
| 14 | 9 | 7.500  | 0.0183970719013899     |
| 14 | 9 | 7.750  | 0.0236176258483738     |
| 14 | 9 | 8.000  | 0.0259820441226104     |
| 14 | 9 | 8.250  | 0.0228685711524950     |
| 14 | 9 | 8.500  | 0.0205559473624390     |
| 14 | 9 | 8.750  | 0.0188236409900824     |
| 14 | 9 | 9.000  | 0.0008878126398327     |
| 14 | 9 | 9.250  | 0.0109822249840582     |
| 14 | 9 | 9.500  | -0.0041074519711295    |
| 14 | 9 | 9.750  | -0.0110632903950230    |
| 14 | 9 | 10.000 | 0.0039311823201564     |
| 14 | 9 | 10.250 | -0.0133702386338561    |
| 14 | 9 | 10.500 | -0.0153841411891710    |
| 14 | 9 | 10.750 | -0.0004018946161056    |
| 14 | 9 | 11.000 | 0.0032483219018484     |
| 14 | 9 | 11.250 | 0.0145160506424657     |

|    |    |        |                       |
|----|----|--------|-----------------------|
| 14 | 9  | 11.500 | 0.0199882324691635    |
| 14 | 9  | 11.750 | -0.0348534079504431   |
| 14 | 9  | 12.000 | -0.0008924827947178   |
| 14 | 9  | 12.250 | 0.0295848622060555    |
| 14 | 9  | 12.500 | 0.0307513330160036    |
| 14 | 9  | 12.750 | 0.0158715975754989    |
| 14 | 9  | 13.000 | -0.0019253864471321   |
| 14 | 9  | 13.250 | -0.0121580503599823   |
| 14 | 9  | 13.500 | -0.0143435533914646   |
| 14 | 9  | 13.750 | -0.0104409383294492   |
| 14 | 9  | 14.000 | -0.0023694253764938   |
| 14 | 9  | 14.250 | 0.0078819559017541    |
| 14 | 9  | 14.500 | 0.0179475795292405    |
| 14 | 9  | 14.750 | 0.0253543031628177    |
| 14 | 9  | 15.000 | 0.0276120886220440    |
| 14 | 9  | 15.250 | 0.0231800188962987    |
| 14 | 9  | 15.500 | 0.0143610457547649    |
| 14 | 9  | 15.750 | 0.0044220130671311    |
| 14 | 9  | 16.000 | -0.0033799730035520   |
| 14 | 9  | 16.250 | -0.0066349616337918   |
| 14 | 9  | 16.500 | -0.0062594706807757   |
| 14 | 9  | 16.750 | -0.0039927053945137   |
| 14 | 9  | 17.000 | -0.0015699040014856   |
| 14 | 9  | 17.250 | -0.0003500496707054   |
| 14 | 9  | 17.500 | -0.0001869238148915   |
| 14 | 9  | 17.750 | -0.0005590059137671   |
| 14 | 9  | 18.000 | -0.0009468900224349   |
| 14 | 9  | 18.250 | -0.0009536095877144   |
| 14 | 9  | 18.500 | -0.0006657010619230   |
| 14 | 9  | 18.750 | -0.0002889211834037   |
| 14 | 9  | 19.000 | -0.0000280203860811   |
| 14 | 9  | 19.250 | -0.0000395016778155   |
| 14 | 9  | 19.500 | -0.0002909291221026   |
| 14 | 9  | 19.750 | -0.0007041591580858   |
| 14 | 9  | 20.000 | -0.0012032702913505   |
| 14 | 9  | 20.250 | -0.0017153637975210   |
| 14 | 9  | 20.500 | -0.0021725623139773   |
| 14 | 9  | 20.750 | -0.0025077568218315   |
| 14 | 9  | 21.000 | -0.0026540973725179   |
| 14 | 9  | 21.250 | -0.0025771729549193   |
| 14 | 9  | 21.500 | -0.0023674122858972   |
| 14 | 9  | 21.750 | -0.0021463656046044   |
| 14 | 9  | 22.000 | -0.0020356956947031   |
| 14 | 9  | 22.250 | -0.0021221687334811   |
| 14 | 9  | 22.500 | -0.0023516967713560   |
| 14 | 9  | 22.750 | -0.0026350597330850   |
| 14 | 9  | 23.000 | -0.0028833682457716   |
| 14 | 9  | 23.250 | -0.0030229903860133   |
| 14 | 9  | 23.500 | -0.0030373916442514   |
| 14 | 9  | 23.750 | -0.0029241405726374   |
| 14 | 9  | 24.000 | -0.0026807666079555   |
| 14 | 9  | 24.250 | -0.0023247057413916   |
| 14 | 9  | 24.500 | -0.0019513210440771   |
| 14 | 9  | 24.750 | -0.0016748041687382   |
| 14 | 9  | 25.000 | -0.0016077440091493   |
| 14 | 9  | 25.250 | -0.0018121048262959   |
| 14 | 9  | 25.500 | -0.0021511823757607   |
| 14 | 9  | 25.750 | -0.0024403278971828   |
| 14 | 9  | 26.000 | -0.0024953054714035   |
| 14 | 9  | 26.250 | -0.0021963599104770   |
| 14 | 9  | 26.500 | -0.0016835029980045   |
| 14 | 9  | 26.750 | -0.0011631452792770   |
| 14 | 9  | 27.000 | -0.0008444603272816   |
| 14 | 9  | 27.250 | -0.0008691401662064   |
| 14 | 9  | 27.500 | -0.0011080898982028   |
| 14 | 9  | 27.750 | -0.0013664996685576   |
| 14 | 9  | 28.000 | -0.0014559923905994   |
| 14 | 9  | 28.250 | -0.0012618380937906   |
| 14 | 9  | 28.500 | -0.0009424255241631   |
| 14 | 9  | 28.750 | -0.0007226942362837   |
| 14 | 9  | 29.000 | -0.0008286291137498   |
| 14 | 9  | 29.250 | -0.0013936660100765   |
| 14 | 9  | 29.500 | -0.0021839386126406   |
| 14 | 9  | 29.750 | -0.0028808552587077   |
| 14 | 9  | 30.000 | -0.0031795893804429   |
| 14 | 12 | 4.000  | 4701.8846281451042159 |
| 14 | 12 | 4.250  | 1713.4318827858369332 |
| 14 | 12 | 4.500  | 613.9399006458952499  |
| 14 | 12 | 4.750  | 214.0135608803575451  |
| 14 | 12 | 5.000  | 73.5305389160166669   |
| 14 | 12 | 5.250  | 25.3209515228563760   |
| 14 | 12 | 5.500  | 9.0123968263837924    |
| 14 | 12 | 5.750  | 3.3177723292610608    |
| 14 | 12 | 6.000  | 1.3107627854958537    |
| 14 | 12 | 6.250  | 0.5357340013032399    |
| 14 | 12 | 6.500  | 0.2427476079815847    |
| 14 | 12 | 6.750  | 0.1102125560239529    |
| 14 | 12 | 7.000  | 0.0472105229299373    |
| 14 | 12 | 7.250  | 0.0254460671685433    |
| 14 | 12 | 7.500  | 0.0001252649050434    |
| 14 | 12 | 7.750  | -0.0271820108828393   |
| 14 | 12 | 8.000  | -0.0107033789961974   |
| 14 | 12 | 8.250  | -0.0059324301075208   |
| 14 | 12 | 8.500  | -0.0020222865464916   |
| 14 | 12 | 8.750  | -0.0022807444104842   |

|    |    |        |                      |
|----|----|--------|----------------------|
| 14 | 12 | 9.000  | 0.0012812553907793   |
| 14 | 12 | 9.250  | -0.0018271109545083  |
| 14 | 12 | 9.500  | -0.0011458358460459  |
| 14 | 12 | 9.750  | 0.0074090186149363   |
| 14 | 12 | 10.000 | -0.0035062063217879  |
| 14 | 12 | 10.250 | 0.0029366055373998   |
| 14 | 12 | 10.500 | -0.0000580748656347  |
| 14 | 12 | 10.750 | -0.0083503776463800  |
| 14 | 12 | 11.000 | 0.0305136792687932   |
| 14 | 12 | 11.250 | -0.01247233866046810 |
| 14 | 12 | 11.500 | -0.0018880976155131  |
| 14 | 12 | 11.750 | 0.0111455034073984   |
| 14 | 12 | 12.000 | -0.0002934122479985  |
| 14 | 12 | 12.250 | -0.0084750403323923  |
| 14 | 12 | 12.500 | -0.0084481291259166  |
| 14 | 12 | 12.750 | -0.0039096504400007  |
| 14 | 12 | 13.000 | 0.0012881728161709   |
| 14 | 12 | 13.250 | 0.0040616783841330   |
| 14 | 12 | 13.500 | 0.0046128474579135   |
| 14 | 12 | 13.750 | 0.0039750467553645   |
| 14 | 12 | 14.000 | 0.0032024588014963   |
| 14 | 12 | 14.250 | 0.0031220547051838   |
| 14 | 12 | 14.500 | 0.0035610131311596   |
| 14 | 12 | 14.750 | 0.0040895495443518   |
| 14 | 12 | 15.000 | 0.0042758017729305   |
| 14 | 12 | 15.250 | 0.0038209228110055   |
| 14 | 12 | 15.500 | 0.0029576051851876   |
| 14 | 12 | 15.750 | 0.0020497655751051   |
| 14 | 12 | 16.000 | 0.0014616819229705   |
| 14 | 12 | 16.250 | 0.0014413527131580   |
| 14 | 12 | 16.500 | 0.0017662208652247   |
| 14 | 12 | 16.750 | 0.0020952810375539   |
| 14 | 12 | 17.000 | 0.0020877638362631   |
| 14 | 12 | 17.250 | 0.0015081176599914   |
| 14 | 12 | 17.500 | 0.0005382733724901   |
| 14 | 12 | 17.750 | -0.0005354528167105  |
| 14 | 12 | 18.000 | -0.0014266582368934  |
| 14 | 12 | 18.250 | -0.0019114787105399  |
| 14 | 12 | 18.500 | -0.0020165400042189  |
| 14 | 12 | 18.750 | -0.0018309908667202  |
| 14 | 12 | 19.000 | -0.0014435858874116  |
| 14 | 12 | 19.250 | -0.0009447914169396  |
| 14 | 12 | 19.500 | -0.0004319589830419  |
| 14 | 12 | 19.750 | -0.0000039278471760  |
| 14 | 12 | 20.000 | 0.0002412194886781   |
| 14 | 12 | 20.250 | 0.0002406858277146   |
| 14 | 12 | 20.500 | 0.0000704648029120   |
| 14 | 12 | 20.750 | -0.0001587596467716  |
| 14 | 12 | 21.000 | -0.0003353463903624  |
| 14 | 12 | 21.250 | -0.0003708392382940  |
| 14 | 12 | 21.500 | -0.0002729445068792  |
| 14 | 12 | 21.750 | -0.0000741749198884  |
| 14 | 12 | 22.000 | 0.0001929135720852   |
| 14 | 12 | 22.250 | 0.0004887921938923   |
| 14 | 12 | 22.500 | 0.0007474195290883   |
| 14 | 12 | 22.750 | 0.0008961403697153   |
| 14 | 12 | 23.000 | 0.0008626840630414   |
| 14 | 12 | 23.250 | 0.0006114014560736   |
| 14 | 12 | 23.500 | 0.0002515295481524   |
| 14 | 12 | 23.750 | -0.0000715763342281  |
| 14 | 12 | 24.000 | -0.0002124670768291  |
| 14 | 12 | 24.250 | -0.0000730206067989  |
| 14 | 12 | 24.500 | 0.0002560844636566   |
| 14 | 12 | 24.750 | 0.0006368414979395   |
| 14 | 12 | 25.000 | 0.0009313296417832   |
| 14 | 12 | 25.250 | 0.0010303271867785   |
| 14 | 12 | 25.500 | 0.0009390857890746   |
| 14 | 12 | 25.750 | 0.0006919090540008   |
| 14 | 12 | 26.000 | 0.0003240125538459   |
| 14 | 12 | 26.250 | -0.0001175328669794  |
| 14 | 12 | 26.500 | -0.0005378801417225  |
| 14 | 12 | 26.750 | -0.0008298578861591  |
| 14 | 12 | 27.000 | -0.0008845935450985  |
| 14 | 12 | 27.250 | -0.0006346506916857  |
| 14 | 12 | 27.500 | -0.0001845349508203  |
| 14 | 12 | 27.750 | 0.0003174473167233   |
| 14 | 12 | 28.000 | 0.0007226143725032   |
| 14 | 12 | 28.250 | 0.0009181710585605   |
| 14 | 12 | 28.500 | 0.0009358566143771   |
| 14 | 12 | 28.750 | 0.0008451768161920   |
| 14 | 12 | 29.000 | 0.0007180997696358   |
| 14 | 12 | 29.250 | 0.0006165376935230   |
| 14 | 12 | 29.500 | 0.0005512749902207   |
| 14 | 12 | 29.750 | 0.0005175065426749   |
| 14 | 12 | 30.000 | 0.0005079788719151   |
| 15 | 0  | 4.000  | 345.7287548786550815 |
| 15 | 0  | 4.250  | 121.2265311478613512 |
| 15 | 0  | 4.500  | 42.5024730524768302  |
| 15 | 0  | 4.750  | 14.6007483443158890  |
| 15 | 0  | 5.000  | 4.9461355323242060   |
| 15 | 0  | 5.250  | 1.6778925322128657   |
| 15 | 0  | 5.500  | 0.5797865767173391   |
| 15 | 0  | 5.750  | 0.2044112764915127   |
| 15 | 0  | 6.000  | 0.0806438071461599   |
| 15 | 0  | 6.250  | 0.0340565023150745   |

|    |   |        |                     |
|----|---|--------|---------------------|
| 15 | 0 | 6.500  | 0.0163091248085792  |
| 15 | 0 | 6.750  | 0.0018311783266318  |
| 15 | 0 | 7.000  | 0.0036414883454228  |
| 15 | 0 | 7.250  | 0.0018799386977317  |
| 15 | 0 | 7.500  | 0.0012471557592342  |
| 15 | 0 | 7.750  | 0.0006814604152357  |
| 15 | 0 | 8.000  | 0.0001852666636356  |
| 15 | 0 | 8.250  | -0.0000089905128624 |
| 15 | 0 | 8.500  | -0.0000675783061331 |
| 15 | 0 | 8.750  | -0.0006276442204410 |
| 15 | 0 | 9.000  | -0.0012933323285670 |
| 15 | 0 | 9.250  | -0.0013953293523424 |
| 15 | 0 | 9.500  | 0.0002591857259312  |
| 15 | 0 | 9.750  | -0.0008733540326656 |
| 15 | 0 | 10.000 | -0.0008471284066441 |
| 15 | 0 | 10.250 | -0.0004689566352220 |
| 15 | 0 | 10.500 | -0.0001707807674335 |
| 15 | 0 | 10.750 | -0.0010946902684605 |
| 15 | 0 | 11.000 | 0.0008514181261527  |
| 15 | 0 | 11.250 | -0.0008141756437987 |
| 15 | 0 | 11.500 | -0.0020796076163791 |
| 15 | 0 | 11.750 | -0.0016402098344013 |
| 15 | 0 | 12.000 | -0.0006164798145545 |
| 15 | 0 | 12.250 | 0.0000122366391166  |
| 15 | 0 | 12.500 | 0.0001932914417698  |
| 15 | 0 | 12.750 | 0.0001025235204558  |
| 15 | 0 | 13.000 | -0.0000815276161296 |
| 15 | 0 | 13.250 | -0.0002088248727253 |
| 15 | 0 | 13.500 | -0.0002620626871566 |
| 15 | 0 | 13.750 | -0.0002591550129144 |
| 15 | 0 | 14.000 | -0.0002192364019240 |
| 15 | 0 | 14.250 | -0.0001615237899114 |
| 15 | 0 | 14.500 | -0.0001033500850350 |
| 15 | 0 | 14.750 | -0.0000614270007751 |
| 15 | 0 | 15.000 | -0.0000523459840876 |
| 15 | 0 | 15.250 | -0.0000856709989969 |
| 15 | 0 | 15.500 | -0.0001431591465156 |
| 15 | 0 | 15.750 | -0.0001996843946216 |
| 15 | 0 | 16.000 | -0.0002302501204504 |
| 15 | 0 | 16.250 | -0.0002190871619907 |
| 15 | 0 | 16.500 | -0.0001867382908660 |
| 15 | 0 | 16.750 | -0.0001627460065951 |
| 15 | 0 | 17.000 | -0.0001766281237338 |
| 15 | 0 | 17.250 | -0.0002466686221867 |
| 15 | 0 | 17.500 | -0.0003462705426313 |
| 15 | 0 | 17.750 | -0.0004375927926915 |
| 15 | 0 | 18.000 | -0.0004827863995157 |
| 15 | 0 | 18.250 | -0.0004559612748471 |
| 15 | 0 | 18.500 | -0.0003790609650999 |
| 15 | 0 | 18.750 | -0.0002860016544780 |
| 15 | 0 | 19.000 | -0.0002106948171258 |
| 15 | 0 | 19.250 | -0.0001779189228426 |
| 15 | 0 | 19.500 | -0.0001759107572966 |
| 15 | 0 | 19.750 | -0.0001837764361602 |
| 15 | 0 | 20.000 | -0.0001806186102267 |
| 15 | 0 | 20.250 | -0.0001520013843722 |
| 15 | 0 | 20.500 | -0.0001093692777993 |
| 15 | 0 | 20.750 | -0.0000706505232667 |
| 15 | 0 | 21.000 | -0.0000537857042644 |
| 15 | 0 | 21.250 | -0.0000703958781940 |
| 15 | 0 | 21.500 | -0.0001067858592749 |
| 15 | 0 | 21.750 | -0.0001429541532681 |
| 15 | 0 | 22.000 | -0.0001589209783235 |
| 15 | 0 | 22.250 | -0.0001411938881018 |
| 15 | 0 | 22.500 | -0.0001020723751060 |
| 15 | 0 | 22.750 | -0.0000603132852101 |
| 15 | 0 | 23.000 | -0.0000346922457170 |
| 15 | 0 | 23.250 | -0.0000383065997375 |
| 15 | 0 | 23.500 | -0.0000613904353560 |
| 15 | 0 | 23.750 | -0.0000884510825460 |
| 15 | 0 | 24.000 | -0.0001039979006985 |
| 15 | 0 | 24.250 | -0.0000965653991073 |
| 15 | 0 | 24.500 | -0.0000708516853084 |
| 15 | 0 | 24.750 | -0.0000356068663300 |
| 15 | 0 | 25.000 | 0.0000003741358250  |
| 15 | 0 | 25.250 | 0.0000281009243157  |
| 15 | 0 | 25.500 | 0.0000380592935095  |
| 15 | 0 | 25.750 | 0.0000206691932297  |
| 15 | 0 | 26.000 | -0.0000335915182646 |
| 15 | 0 | 26.250 | -0.0001275072101251 |
| 15 | 0 | 26.500 | -0.0002368961972292 |
| 15 | 0 | 26.750 | -0.0003307773882547 |
| 15 | 0 | 27.000 | -0.0003780392197589 |
| 15 | 0 | 27.250 | -0.0003579486957868 |
| 15 | 0 | 27.500 | -0.0002916310330157 |
| 15 | 0 | 27.750 | -0.0002106390534289 |
| 15 | 0 | 28.000 | -0.0001463737889812 |
| 15 | 0 | 28.250 | -0.0001215118091346 |
| 15 | 0 | 28.500 | -0.0001242355351604 |
| 15 | 0 | 28.750 | -0.0001340667319102 |
| 15 | 0 | 29.000 | -0.0001303561727841 |
| 15 | 0 | 29.250 | -0.0000990093762434 |
| 15 | 0 | 29.500 | -0.0000527229850552 |
| 15 | 0 | 29.750 | -0.0000108926477777 |
| 15 | 0 | 30.000 | 0.0000072906295930  |

|    |   |        |                      |
|----|---|--------|----------------------|
| 15 | 3 | 4.000  | -68.1026620682487049 |
| 15 | 3 | 4.250  | -15.5191711112644555 |
| 15 | 3 | 4.500  | -3.0818278680783635  |
| 15 | 3 | 4.750  | -0.3770608680158887  |
| 15 | 3 | 5.000  | 0.0754049957955374   |
| 15 | 3 | 5.250  | 0.0653367562310621   |
| 15 | 3 | 5.500  | 0.0285533115133703   |
| 15 | 3 | 5.750  | 0.0049404253231984   |
| 15 | 3 | 6.000  | 0.0005139854119207   |
| 15 | 3 | 6.250  | -0.0143369771562618  |
| 15 | 3 | 6.500  | -0.0096673405447234  |
| 15 | 3 | 6.750  | -0.0079238872417164  |
| 15 | 3 | 7.000  | -0.0028375334067192  |
| 15 | 3 | 7.250  | -0.0025053062850873  |
| 15 | 3 | 7.500  | -0.0020251037227972  |
| 15 | 3 | 7.750  | -0.0003971595728842  |
| 15 | 3 | 8.000  | 0.0016345856011145   |
| 15 | 3 | 8.250  | 0.0017062412432321   |
| 15 | 3 | 8.500  | 0.0008618083618637   |
| 15 | 3 | 8.750  | -0.0001505152704902  |
| 15 | 3 | 9.000  | 0.0011974288491831   |
| 15 | 3 | 9.250  | -0.0016199341780250  |
| 15 | 3 | 9.500  | -0.0009103105987893  |
| 15 | 3 | 9.750  | 0.0003175783158998   |
| 15 | 3 | 10.000 | -0.0009373260619314  |
| 15 | 3 | 10.250 | -0.0000753188246212  |
| 15 | 3 | 10.500 | -0.0001606813174854  |
| 15 | 3 | 10.750 | -0.0045197560761932  |
| 15 | 3 | 11.000 | 0.0055056290425233   |
| 15 | 3 | 11.250 | 0.0004838295830421   |
| 15 | 3 | 11.500 | 0.0028155214940880   |
| 15 | 3 | 11.750 | 0.0061555898669730   |
| 15 | 3 | 12.000 | -0.0001370271129362  |
| 15 | 3 | 12.250 | -0.0043441996034791  |
| 15 | 3 | 12.500 | -0.0043855378847007  |
| 15 | 3 | 12.750 | -0.0022183944205259  |
| 15 | 3 | 13.000 | 0.0001923762532913   |
| 15 | 3 | 13.250 | 0.0012982618129913   |
| 15 | 3 | 13.500 | 0.0012539116922784   |
| 15 | 3 | 13.750 | 0.0006436213790433   |
| 15 | 3 | 14.000 | 0.0000538251172599   |
| 15 | 3 | 14.250 | -0.0000650828724510  |
| 15 | 3 | 14.500 | 0.0001898186839402   |
| 15 | 3 | 14.750 | 0.0005842448609076   |
| 15 | 3 | 15.000 | 0.0008834417376624   |
| 15 | 3 | 15.250 | 0.0009111344589026   |
| 15 | 3 | 15.500 | 0.0007268894304138   |
| 15 | 3 | 15.750 | 0.0004494222047739   |
| 15 | 3 | 16.000 | 0.0001975737155147   |
| 15 | 3 | 16.250 | 0.0000631290098269   |
| 15 | 3 | 16.500 | 0.0000298284361853   |
| 15 | 3 | 16.750 | 0.0000544050169934   |
| 15 | 3 | 17.000 | 0.0000935840294085   |
| 15 | 3 | 17.250 | 0.0001120489526667   |
| 15 | 3 | 17.500 | 0.0001063707261611   |
| 15 | 3 | 17.750 | 0.0000810764363794   |
| 15 | 3 | 18.000 | 0.0000406579943768   |
| 15 | 3 | 18.250 | -0.0000089431876998  |
| 15 | 3 | 18.500 | -0.0000559234252638  |
| 15 | 3 | 18.750 | -0.0000869961527320  |
| 15 | 3 | 19.000 | -0.0000888912617560  |
| 15 | 3 | 19.250 | -0.0000541483528481  |
| 15 | 3 | 19.500 | 0.0000015980288000   |
| 15 | 3 | 19.750 | 0.0000569886138526   |
| 15 | 3 | 20.000 | 0.0000906882220564   |
| 15 | 3 | 20.250 | 0.0000870876190343   |
| 15 | 3 | 20.500 | 0.0000534999339803   |
| 15 | 3 | 20.750 | 0.0000030376221245   |
| 15 | 3 | 21.000 | -0.0000510411661250  |
| 15 | 3 | 21.250 | -0.0000964916329240  |
| 15 | 3 | 21.500 | -0.0001258118055027  |
| 15 | 3 | 21.750 | -0.0001328380443517  |
| 15 | 3 | 22.000 | -0.000114087992924   |
| 15 | 3 | 22.250 | -0.0000595146332824  |
| 15 | 3 | 22.500 | 0.0000081170253840   |
| 15 | 3 | 22.750 | 0.0000725106602132   |
| 15 | 3 | 23.000 | 0.0001145874770514   |
| 15 | 3 | 23.250 | 0.0001214508141009   |
| 15 | 3 | 23.500 | 0.0001054121113862   |
| 15 | 3 | 23.750 | 0.0000851377171522   |
| 15 | 3 | 24.000 | 0.0000792561009820   |
| 15 | 3 | 24.250 | 0.0000998431355641   |
| 15 | 3 | 24.500 | 0.0001329293293551   |
| 15 | 3 | 24.750 | 0.0001580766752872   |
| 15 | 3 | 25.000 | 0.0001548991985747   |
| 15 | 3 | 25.250 | 0.0001106612088857   |
| 15 | 3 | 25.500 | 0.0000434267472432   |
| 15 | 3 | 25.750 | -0.0000209806867025  |
| 15 | 3 | 26.000 | -0.0000565125805290  |
| 15 | 3 | 26.250 | -0.0000454497476474  |
| 15 | 3 | 26.500 | -0.0000037276281919  |
| 15 | 3 | 26.750 | 0.0000443172830946   |
| 15 | 3 | 27.000 | 0.0000744964306962   |
| 15 | 3 | 27.250 | 0.0000699892341996   |
| 15 | 3 | 27.500 | 0.0000424728811246   |

|    |   |        |                        |
|----|---|--------|------------------------|
| 15 | 3 | 27.750 | 0.0000106552485353     |
| 15 | 3 | 28.000 | -0.0000067964647198    |
| 15 | 3 | 28.250 | 0.0000029325295658     |
| 15 | 3 | 28.500 | 0.0000295403076671     |
| 15 | 3 | 28.750 | 0.0000570862594091     |
| 15 | 3 | 29.000 | 0.0000698587104336     |
| 15 | 3 | 29.250 | 0.0000574123838899     |
| 15 | 3 | 29.500 | 0.0000296924709799     |
| 15 | 3 | 29.750 | 0.0000017941698234     |
| 15 | 3 | 30.000 | -0.0000109412981831    |
| 15 | 6 | 4.000  | -1798.4205853980454322 |
| 15 | 6 | 4.250  | -670.3661893733110446  |
| 15 | 6 | 4.500  | -244.6396593905053010  |
| 15 | 6 | 4.750  | -86.6749601386331960   |
| 15 | 6 | 5.000  | -30.1742212939919625   |
| 15 | 6 | 5.250  | -10.4372268949119302   |
| 15 | 6 | 5.500  | -3.7083091431661543    |
| 15 | 6 | 5.750  | -1.3181487589726633    |
| 15 | 6 | 6.000  | -0.5243491686387571    |
| 15 | 6 | 6.250  | -0.1790538465519091    |
| 15 | 6 | 6.500  | -0.0547357735501919    |
| 15 | 6 | 6.750  | -0.0065281942916755    |
| 15 | 6 | 7.000  | -0.0075961205033803    |
| 15 | 6 | 7.250  | 0.0012603156022664     |
| 15 | 6 | 7.500  | 0.0026090956485429     |
| 15 | 6 | 7.750  | 0.0061060624887226     |
| 15 | 6 | 8.000  | 0.0022280000402261     |
| 15 | 6 | 8.250  | 0.0067562305296829     |
| 15 | 6 | 8.500  | -0.0019650944828864    |
| 15 | 6 | 8.750  | -0.0055228920268694    |
| 15 | 6 | 9.000  | 0.0003081792346795     |
| 15 | 6 | 9.250  | -0.0020109469795438    |
| 15 | 6 | 9.500  | 0.0039260299189111     |
| 15 | 6 | 9.750  | 0.0007858687252668     |
| 15 | 6 | 10.000 | 0.0066393619716070     |
| 15 | 6 | 10.250 | 0.0012977993324397     |
| 15 | 6 | 10.500 | -0.0020107058174450    |
| 15 | 6 | 10.750 | -0.0004793300458912    |
| 15 | 6 | 11.000 | -0.0043018263749979    |
| 15 | 6 | 11.250 | -0.0030978269431121    |
| 15 | 6 | 11.500 | 0.0370822555412054     |
| 15 | 6 | 11.750 | -0.0165495294433384    |
| 15 | 6 | 12.000 | -0.0000621370118955    |
| 15 | 6 | 12.250 | 0.0209098234104606     |
| 15 | 6 | 12.500 | 0.0217043145378643     |
| 15 | 6 | 12.750 | 0.0116673137642818     |
| 15 | 6 | 13.000 | 0.0001334129625585     |
| 15 | 6 | 13.250 | -0.0055441561401308    |
| 15 | 6 | 13.500 | -0.0058642913379424    |
| 15 | 6 | 13.750 | -0.0032815263064777    |
| 15 | 6 | 14.000 | -0.0002448032365147    |
| 15 | 6 | 14.250 | 0.0013079070169173     |
| 15 | 6 | 14.500 | 0.0014704878709582     |
| 15 | 6 | 14.750 | 0.0008448756459668     |
| 15 | 6 | 15.000 | 0.0000340955284544     |
| 15 | 6 | 15.250 | -0.0004713569423920    |
| 15 | 6 | 15.500 | -0.0006360504837702    |
| 15 | 6 | 15.750 | -0.0005390435112902    |
| 15 | 6 | 16.000 | -0.0002589590548205    |
| 15 | 6 | 16.250 | 0.0001212334698626     |
| 15 | 6 | 16.500 | 0.0004970067828317     |
| 15 | 6 | 16.750 | 0.0007579754825714     |
| 15 | 6 | 17.000 | 0.0007937210224187     |
| 15 | 6 | 17.250 | 0.0005437568673616     |
| 15 | 6 | 17.500 | 0.0001453667430841     |
| 15 | 6 | 17.750 | -0.0002151467886186    |
| 15 | 6 | 18.000 | -0.0003521221561683    |
| 15 | 6 | 18.250 | -0.0001461460631555    |
| 15 | 6 | 18.500 | 0.0002589174282816     |
| 15 | 6 | 18.750 | 0.0006537108977221     |
| 15 | 6 | 19.000 | 0.0008291655677378     |
| 15 | 6 | 19.250 | 0.0006422628218410     |
| 15 | 6 | 19.500 | 0.0002140549961762     |
| 15 | 6 | 19.750 | -0.0002688210907915    |
| 15 | 6 | 20.000 | -0.0006202985036136    |
| 15 | 6 | 20.250 | -0.0007039124094369    |
| 15 | 6 | 20.500 | -0.0005802544910284    |
| 15 | 6 | 20.750 | -0.0003590565668250    |
| 15 | 6 | 21.000 | -0.0001506028197848    |
| 15 | 6 | 21.250 | -0.0000421129714985    |
| 15 | 6 | 21.500 | -0.0000266316564449    |
| 15 | 6 | 21.750 | -0.0000733851203363    |
| 15 | 6 | 22.000 | -0.0001515589329088    |
| 15 | 6 | 22.250 | -0.0002324905307216    |
| 15 | 6 | 22.500 | -0.0002954027080483    |
| 15 | 6 | 22.750 | -0.0003214188483570    |
| 15 | 6 | 23.000 | -0.0002917058583750    |
| 15 | 6 | 23.250 | -0.0001994999920318    |
| 15 | 6 | 23.500 | -0.0000869949688744    |
| 15 | 6 | 23.750 | -0.0000089472370564    |
| 15 | 6 | 24.000 | -0.0000205507191963    |
| 15 | 6 | 24.250 | -0.0001563709356600    |
| 15 | 6 | 24.500 | -0.0003669604764829    |
| 15 | 6 | 24.750 | -0.0005817240113291    |
| 15 | 6 | 25.000 | -0.0007302571425749    |

|    |   |        |                       |
|----|---|--------|-----------------------|
| 15 | 6 | 25.250 | -0.0007613231009225   |
| 15 | 6 | 25.500 | -0.0006993582527899   |
| 15 | 6 | 25.750 | -0.0005877389843769   |
| 15 | 6 | 26.000 | -0.0004703369782635   |
| 15 | 6 | 26.250 | -0.0003837791456296   |
| 15 | 6 | 26.500 | -0.0003330406590651   |
| 15 | 6 | 26.750 | -0.0003145884290968   |
| 15 | 6 | 27.000 | -0.0003243928391609   |
| 15 | 6 | 27.250 | -0.0003534678720672   |
| 15 | 6 | 27.500 | -0.0003734586599451   |
| 15 | 6 | 27.750 | -0.0003508924965875   |
| 15 | 6 | 28.000 | -0.0002515577693748   |
| 15 | 6 | 28.250 | -0.0000587566980345   |
| 15 | 6 | 28.500 | 0.0001712597021250    |
| 15 | 6 | 28.750 | 0.0003635967689610    |
| 15 | 6 | 29.000 | 0.0004435141536841    |
| 15 | 6 | 29.250 | 0.0003649998733919    |
| 15 | 6 | 29.500 | 0.0001941291864612    |
| 15 | 6 | 29.750 | 0.0000241775360266    |
| 15 | 6 | 30.000 | -0.0000528257126404   |
| 15 | 9 | 4.000  | 4810.0760232174043267 |
| 15 | 9 | 4.250  | 1727.9080219212737575 |
| 15 | 9 | 4.500  | 616.0436375727622362  |
| 15 | 9 | 4.750  | 213.9187871662934413  |
| 15 | 9 | 5.000  | 73.0589340698581964   |
| 15 | 9 | 5.250  | 24.8100588566566103   |
| 15 | 9 | 5.500  | 8.5722894553452988    |
| 15 | 9 | 5.750  | 3.0044426715909367    |
| 15 | 9 | 6.000  | 1.1427157571427529    |
| 15 | 9 | 6.250  | 0.5309195930373107    |
| 15 | 9 | 6.500  | 0.2306283288191935    |
| 15 | 9 | 6.750  | 0.0796514265326778    |
| 15 | 9 | 7.000  | 0.0400560750483407    |
| 15 | 9 | 7.250  | 0.0224376928836421    |
| 15 | 9 | 7.500  | -0.0193079660134465   |
| 15 | 9 | 7.750  | -0.0238427541697774   |
| 15 | 9 | 8.000  | -0.0130027160480335   |
| 15 | 9 | 8.250  | -0.0091410400346410   |
| 15 | 9 | 8.500  | -0.0019553645945569   |
| 15 | 9 | 8.750  | 0.0069840273509276    |
| 15 | 9 | 9.000  | 0.0129800088385488    |
| 15 | 9 | 9.250  | -0.0106973903720264   |
| 15 | 9 | 9.500  | 0.0016882847067694    |
| 15 | 9 | 9.750  | -0.0079954247201905   |
| 15 | 9 | 10.000 | -0.0092904126933959   |
| 15 | 9 | 10.250 | -0.0057881186902802   |
| 15 | 9 | 10.500 | -0.0109567062982281   |
| 15 | 9 | 10.750 | 0.0082288247621916    |
| 15 | 9 | 11.000 | -0.0453134111932011   |
| 15 | 9 | 11.250 | -0.0258246904283096   |
| 15 | 9 | 11.500 | -0.0285663222491794   |
| 15 | 9 | 11.750 | 0.0310738315933756    |
| 15 | 9 | 12.000 | -0.0001238067893464   |
| 15 | 9 | 12.250 | -0.0302180556448168   |
| 15 | 9 | 12.500 | -0.0316020820016052   |
| 15 | 9 | 12.750 | -0.0173176863399929   |
| 15 | 9 | 13.000 | -0.0003040051706731   |
| 15 | 9 | 13.250 | 0.0091488614420280    |
| 15 | 9 | 13.500 | 0.0108117212298116    |
| 15 | 9 | 13.750 | 0.0069189176167792    |
| 15 | 9 | 14.000 | -0.0003299117925975   |
| 15 | 9 | 14.250 | -0.0088199081100345   |
| 15 | 9 | 14.500 | -0.0166925702433004   |
| 15 | 9 | 14.750 | -0.0221453162956838   |
| 15 | 9 | 15.000 | -0.0233631098887626   |
| 15 | 9 | 15.250 | -0.0192831127953772   |
| 15 | 9 | 15.500 | -0.0118865267374157   |
| 15 | 9 | 15.750 | -0.0039161900226073   |
| 15 | 9 | 16.000 | 0.0018957205373664    |
| 15 | 9 | 16.250 | 0.0035679402734459    |
| 15 | 9 | 16.500 | 0.0020674172385214    |
| 15 | 9 | 16.750 | -0.0009099916321224   |
| 15 | 9 | 17.000 | -0.0036720902832969   |
| 15 | 9 | 17.250 | -0.0048926319179923   |
| 15 | 9 | 17.500 | -0.0047086542947734   |
| 15 | 9 | 17.750 | -0.0036225429087063   |
| 15 | 9 | 18.000 | -0.0021352887570088   |
| 15 | 9 | 18.250 | -0.0006949784868621   |
| 15 | 9 | 18.500 | 0.0004575314108577    |
| 15 | 9 | 18.750 | 0.0011316979412878    |
| 15 | 9 | 19.000 | 0.0011357844054654    |
| 15 | 9 | 19.250 | 0.0003796883619495    |
| 15 | 9 | 19.500 | -0.0008155421017044   |
| 15 | 9 | 19.750 | -0.0020249969824137   |
| 15 | 9 | 20.000 | -0.0028225615413058   |
| 15 | 9 | 20.250 | -0.0028999169988343   |
| 15 | 9 | 20.500 | -0.0024237049711947   |
| 15 | 9 | 20.750 | -0.0016799724881429   |
| 15 | 9 | 21.000 | -0.0009551026235908   |
| 15 | 9 | 21.250 | -0.0004801566330748   |
| 15 | 9 | 21.500 | -0.0002648698009302   |
| 15 | 9 | 21.750 | -0.0002634669740779   |
| 15 | 9 | 22.000 | -0.0004294171522401   |
| 15 | 9 | 22.250 | -0.0007059755229324   |
| 15 | 9 | 22.500 | -0.0009994316895018   |

|    |    |        |                        |
|----|----|--------|------------------------|
| 15 | 9  | 22.750 | -0.0012072758125143    |
| 15 | 9  | 23.000 | -0.0012278867129635    |
| 15 | 9  | 23.250 | -0.0010034449859104    |
| 15 | 9  | 23.500 | -0.0006483915328552    |
| 15 | 9  | 23.750 | -0.0003197057674965    |
| 15 | 9  | 24.000 | -0.0001737614907755    |
| 15 | 9  | 24.250 | -0.0003179745806999    |
| 15 | 9  | 24.500 | -0.0006637554300897    |
| 15 | 9  | 24.750 | -0.0010735561476320    |
| 15 | 9  | 25.000 | -0.0014089292747491    |
| 15 | 9  | 25.250 | -0.0015622114765839    |
| 15 | 9  | 25.500 | -0.0015511928165200    |
| 15 | 9  | 25.750 | -0.0014255730961332    |
| 15 | 9  | 26.000 | -0.0012350728157266    |
| 15 | 9  | 26.250 | -0.0010313107224216    |
| 15 | 9  | 26.500 | -0.0008752014372984    |
| 15 | 9  | 26.750 | -0.0008303153501203    |
| 15 | 9  | 27.000 | -0.0009606927228972    |
| 15 | 9  | 27.250 | -0.0012938456880257    |
| 15 | 9  | 27.500 | -0.0017084871142335    |
| 15 | 9  | 27.750 | -0.0020462203881170    |
| 15 | 9  | 28.000 | -0.0021485937044488    |
| 15 | 9  | 28.250 | -0.0019149858548118    |
| 15 | 9  | 28.500 | -0.0014753814638267    |
| 15 | 9  | 28.750 | -0.0010184028767449    |
| 15 | 9  | 29.000 | -0.0007337866684865    |
| 15 | 9  | 29.250 | -0.0007521008237077    |
| 15 | 9  | 29.500 | -0.0009664871455117    |
| 15 | 9  | 29.750 | -0.0012122788253065    |
| 15 | 9  | 30.000 | -0.0013293002158544    |
| 15 | 12 | 4.000  | -4316.3641940653105848 |
| 15 | 12 | 4.250  | -1553.6200212667354208 |
| 15 | 12 | 4.500  | -554.1235373656963930  |
| 15 | 12 | 4.750  | -192.3204857767514113  |
| 15 | 12 | 5.000  | -65.5980280308322108   |
| 15 | 12 | 5.250  | -22.2524702627233637   |
| 15 | 12 | 5.500  | -7.6641740535210374    |
| 15 | 12 | 5.750  | -2.7307092268715678    |
| 15 | 12 | 6.000  | -1.0298176626606619    |
| 15 | 12 | 6.250  | -0.3712309895947783    |
| 15 | 12 | 6.500  | -0.1635538287098370    |
| 15 | 12 | 6.750  | -0.0462388456284089    |
| 15 | 12 | 7.000  | -0.0025787223106661    |
| 15 | 12 | 7.250  | 0.0103051610236093     |
| 15 | 12 | 7.500  | 0.0259400634037661     |
| 15 | 12 | 7.750  | 0.0652162040715183     |
| 15 | 12 | 8.000  | 0.0225714258417682     |
| 15 | 12 | 8.250  | 0.0134281997698249     |
| 15 | 12 | 8.500  | 0.0056962704884285     |
| 15 | 12 | 8.750  | -0.0089454047302482    |
| 15 | 12 | 9.000  | -0.0037761279679387    |
| 15 | 12 | 9.250  | 0.0015218392681575     |
| 15 | 12 | 9.500  | -0.0094560022251926    |
| 15 | 12 | 9.750  | 0.0031481340806838     |
| 15 | 12 | 10.000 | 0.0128806594743125     |
| 15 | 12 | 10.250 | 0.0067632346712507     |
| 15 | 12 | 10.500 | -0.0042360042494209    |
| 15 | 12 | 10.750 | 0.0080215097660652     |
| 15 | 12 | 11.000 | 0.0326322452726355     |
| 15 | 12 | 11.250 | 0.0003376402146245     |
| 15 | 12 | 11.500 | 0.0379892642813147     |
| 15 | 12 | 11.750 | 0.0022285770021737     |
| 15 | 12 | 12.000 | -0.0015473360655909    |
| 15 | 12 | 12.250 | 0.0048134656222851     |
| 15 | 12 | 12.500 | 0.0057897787418693     |
| 15 | 12 | 12.750 | 0.0035799930330107     |
| 15 | 12 | 13.000 | 0.0005026181295102     |
| 15 | 12 | 13.250 | -0.0016012138058663    |
| 15 | 12 | 13.500 | -0.0026819952020594    |
| 15 | 12 | 13.750 | -0.0031117509344862    |
| 15 | 12 | 14.000 | -0.0032634889646521    |
| 15 | 12 | 14.250 | -0.0034394882677293    |
| 15 | 12 | 14.500 | -0.0035948937208234    |
| 15 | 12 | 14.750 | -0.0035909235023923    |
| 15 | 12 | 15.000 | -0.0032855240430651    |
| 15 | 12 | 15.250 | -0.0026028151103447    |
| 15 | 12 | 15.500 | -0.0017305094176092    |
| 15 | 12 | 15.750 | -0.0009208132607519    |
| 15 | 12 | 16.000 | -0.0004234867498131    |
| 15 | 12 | 16.250 | -0.0004040076897951    |
| 15 | 12 | 16.500 | -0.0007003878416686    |
| 15 | 12 | 16.750 | -0.0010692691185506    |
| 15 | 12 | 17.000 | -0.0012671793316783    |
| 15 | 12 | 17.250 | -0.0011214086620640    |
| 15 | 12 | 17.500 | -0.0007426420657354    |
| 15 | 12 | 17.750 | -0.0003130012848559    |
| 15 | 12 | 18.000 | -0.0000143327230312    |
| 15 | 12 | 18.250 | 0.0000293400879691     |
| 15 | 12 | 18.500 | -0.0000751715459497    |
| 15 | 12 | 18.750 | -0.0001633848119854    |
| 15 | 12 | 19.000 | -0.0000700699781194    |
| 15 | 12 | 19.250 | 0.0003054947339839     |
| 15 | 12 | 19.500 | 0.0008021190997557     |
| 15 | 12 | 19.750 | 0.0011926805401658     |
| 15 | 12 | 20.000 | 0.0012502340149642     |



|    |    |        |                       |
|----|----|--------|-----------------------|
| 15 | 12 | 20.250 | 0.0008286249225697    |
| 15 | 12 | 20.500 | 0.0001043712202776    |
| 15 | 12 | 20.750 | -0.0006656704795403   |
| 15 | 12 | 21.000 | -0.0012245971505270   |
| 15 | 12 | 21.250 | -0.0013827067131158   |
| 15 | 12 | 21.500 | -0.0012185524068124   |
| 15 | 12 | 21.750 | -0.0008779220720679   |
| 15 | 12 | 22.000 | -0.0005069185228959   |
| 15 | 12 | 22.250 | -0.0002259558874880   |
| 15 | 12 | 22.500 | -0.0000510253915475   |
| 15 | 12 | 22.750 | 0.0000285660645601    |
| 15 | 12 | 23.000 | 0.0000241194464666    |
| 15 | 12 | 23.250 | -0.0000475712775942   |
| 15 | 12 | 23.500 | -0.0001499896251527   |
| 15 | 12 | 23.750 | -0.0002417456889362   |
| 15 | 12 | 24.000 | -0.0002811740398020   |
| 15 | 12 | 24.250 | -0.0002397467983323   |
| 15 | 12 | 24.500 | -0.0001442134538363   |
| 15 | 12 | 24.750 | -0.0000357198503029   |
| 15 | 12 | 25.000 | 0.0000437902237173    |
| 15 | 12 | 25.250 | 0.0000650286624470    |
| 15 | 12 | 25.500 | 0.0000504393095844    |
| 15 | 12 | 25.750 | 0.0000355850887878    |
| 15 | 12 | 26.000 | 0.0000557875798213    |
| 15 | 12 | 26.250 | 0.0001334431164125    |
| 15 | 12 | 26.500 | 0.0002428346281211    |
| 15 | 12 | 26.750 | 0.0003469086752606    |
| 15 | 12 | 27.000 | 0.0004094730113019    |
| 15 | 12 | 27.250 | 0.0004035127593273    |
| 15 | 12 | 27.500 | 0.0003389876656694    |
| 15 | 12 | 27.750 | 0.0002365214022434    |
| 15 | 12 | 28.000 | 0.0001185513730672    |
| 15 | 12 | 28.250 | 0.0000040743172938    |
| 15 | 12 | 28.500 | -0.0001030789254175   |
| 15 | 12 | 28.750 | -0.0002013713670690   |
| 15 | 12 | 29.000 | -0.0002848488824203   |
| 15 | 12 | 29.250 | -0.0003463700711510   |
| 15 | 12 | 29.500 | -0.0003875229257161   |
| 15 | 12 | 29.750 | -0.0004121363672023   |
| 15 | 12 | 30.000 | -0.0004207482468381   |
| 16 | 0  | 4.000  | -170.4314176539883192 |
| 16 | 0  | 4.250  | -58.7747950120519818  |
| 16 | 0  | 4.500  | -20.5758417387769441  |
| 16 | 0  | 4.750  | -7.0570756782490207   |
| 16 | 0  | 5.000  | -2.3776567135955702   |
| 16 | 0  | 5.250  | -0.7897891856932802   |
| 16 | 0  | 5.500  | -0.2726521941904139   |
| 16 | 0  | 5.750  | -0.0912552859954303   |
| 16 | 0  | 6.000  | -0.0322397447686740   |
| 16 | 0  | 6.250  | -0.0072852808640391   |
| 16 | 0  | 6.500  | -0.0063762118350894   |
| 16 | 0  | 6.750  | -0.0005752777049679   |
| 16 | 0  | 7.000  | -0.0009436180370059   |
| 16 | 0  | 7.250  | -0.0000998261295635   |
| 16 | 0  | 7.500  | -0.0012245594938562   |
| 16 | 0  | 7.750  | -0.0001901663400048   |
| 16 | 0  | 8.000  | 0.0008491914369841    |
| 16 | 0  | 8.250  | 0.0000871833726990    |
| 16 | 0  | 8.500  | -0.0002133163910969   |
| 16 | 0  | 8.750  | 0.0005269380532198    |
| 16 | 0  | 9.000  | 0.0002771196532052    |
| 16 | 0  | 9.250  | -0.0007806671236210   |
| 16 | 0  | 9.500  | -0.0011973562696106   |
| 16 | 0  | 9.750  | -0.0002770051028058   |
| 16 | 0  | 10.000 | -0.0001785291507073   |
| 16 | 0  | 10.250 | -0.0004907161426466   |
| 16 | 0  | 10.500 | -0.0000609715159126   |
| 16 | 0  | 10.750 | 0.0008289474180110    |
| 16 | 0  | 11.000 | -0.0025573099837803   |
| 16 | 0  | 11.250 | 0.0001587525163957    |
| 16 | 0  | 11.500 | -0.0008608477342964   |
| 16 | 0  | 11.750 | 0.0006107285719850    |
| 16 | 0  | 12.000 | 0.0006429026671571    |
| 16 | 0  | 12.250 | 0.0001773099281182    |
| 16 | 0  | 12.500 | -0.0000950402751361   |
| 16 | 0  | 12.750 | -0.0002119973857106   |
| 16 | 0  | 13.000 | -0.0002125567002489   |
| 16 | 0  | 13.250 | -0.0001432791264584   |
| 16 | 0  | 13.500 | -0.0000591743741487   |
| 16 | 0  | 13.750 | -0.0000148061078398   |
| 16 | 0  | 14.000 | -0.0000634349324578   |
| 16 | 0  | 14.250 | -0.0002346389540735   |
| 16 | 0  | 14.500 | -0.0004648861048124   |
| 16 | 0  | 14.750 | -0.0006674526676931   |
| 16 | 0  | 15.000 | -0.0007557303199339   |
| 16 | 0  | 15.250 | -0.0006709748224535   |
| 16 | 0  | 15.500 | -0.0004652415198105   |
| 16 | 0  | 15.750 | -0.0002181686515264   |
| 16 | 0  | 16.000 | -0.0000092047291760   |
| 16 | 0  | 16.250 | 0.0001000992396218    |
| 16 | 0  | 16.500 | 0.0001189149666518    |
| 16 | 0  | 16.750 | 0.0000739939217294    |
| 16 | 0  | 17.000 | -0.0000079897383678   |
| 16 | 0  | 17.250 | -0.0001015107632178   |
| 16 | 0  | 17.500 | -0.0001855513530470   |

|    |   |        |                      |
|----|---|--------|----------------------|
| 16 | 0 | 17.750 | -0.0002402369919321  |
| 16 | 0 | 18.000 | -0.0002456874224850  |
| 16 | 0 | 18.250 | -0.0001909606465546  |
| 16 | 0 | 18.500 | -0.0001007813893752  |
| 16 | 0 | 18.750 | -0.0000087851286545  |
| 16 | 0 | 19.000 | 0.0000513750864798   |
| 16 | 0 | 19.250 | 0.0000552077075015   |
| 16 | 0 | 19.500 | 0.0000149040708046   |
| 16 | 0 | 19.750 | -0.0000481592753431  |
| 16 | 0 | 20.000 | -0.0001125990008156  |
| 16 | 0 | 20.250 | -0.0001609073492951  |
| 16 | 0 | 20.500 | -0.0001910595273918  |
| 16 | 0 | 20.750 | -0.0002048960956955  |
| 16 | 0 | 21.000 | -0.0002042527635360  |
| 16 | 0 | 21.250 | -0.0001912207027534  |
| 16 | 0 | 21.500 | -0.0001688923880955  |
| 16 | 0 | 21.750 | -0.0001406287334382  |
| 16 | 0 | 22.000 | -0.0001097828813681  |
| 16 | 0 | 22.250 | -0.0000802305476182  |
| 16 | 0 | 22.500 | -0.0000579645668406  |
| 16 | 0 | 22.750 | -0.0000495246688139  |
| 16 | 0 | 23.000 | -0.0000614701872572  |
| 16 | 0 | 23.250 | -0.0000963031004993  |
| 16 | 0 | 23.500 | -0.0001403085768693  |
| 16 | 0 | 23.750 | -0.0001756961364729  |
| 16 | 0 | 24.000 | -0.0001846960218855  |
| 16 | 0 | 24.250 | -0.0001559587612134  |
| 16 | 0 | 24.500 | -0.0001037336965003  |
| 16 | 0 | 24.750 | -0.0000486577670310  |
| 16 | 0 | 25.000 | -0.0000113719631205  |
| 16 | 0 | 25.250 | -0.0000064173928375  |
| 16 | 0 | 25.500 | -0.0000239976523801  |
| 16 | 0 | 25.750 | -0.0000482196749374  |
| 16 | 0 | 26.000 | -0.0000631692889888  |
| 16 | 0 | 26.250 | -0.0000583418695767  |
| 16 | 0 | 26.500 | -0.0000448642203021  |
| 16 | 0 | 26.750 | -0.0000392558863559  |
| 16 | 0 | 27.000 | -0.0000579994541730  |
| 16 | 0 | 27.250 | -0.0001104917258019  |
| 16 | 0 | 27.500 | -0.0001777531732651  |
| 16 | 0 | 27.750 | -0.0002336816834378  |
| 16 | 0 | 28.000 | -0.0002520877650734  |
| 16 | 0 | 28.250 | -0.0002165403136550  |
| 16 | 0 | 28.500 | -0.0001499662106278  |
| 16 | 0 | 28.750 | -0.0000851518494346  |
| 16 | 0 | 29.000 | -0.0000548607152157  |
| 16 | 0 | 29.250 | -0.0000808115003855  |
| 16 | 0 | 29.500 | -0.0001406743297388  |
| 16 | 0 | 29.750 | -0.0002010914634121  |
| 16 | 0 | 30.000 | -0.0002286600338855  |
| 16 | 3 | 4.000  | 499.9931003611843607 |
| 16 | 3 | 4.250  | 171.0153167259501288 |
| 16 | 3 | 4.500  | 58.8775501016725116  |
| 16 | 3 | 4.750  | 19.8648086500868430  |
| 16 | 3 | 5.000  | 6.5912176485198586   |
| 16 | 3 | 5.250  | 2.1875401276277131   |
| 16 | 3 | 5.500  | 0.7339159623913574   |
| 16 | 3 | 5.750  | 0.2544661930149523   |
| 16 | 3 | 6.000  | 0.0898302172636321   |
| 16 | 3 | 6.250  | 0.0307373804244691   |
| 16 | 3 | 6.500  | 0.0271126568535003   |
| 16 | 3 | 6.750  | -0.0088236370502059  |
| 16 | 3 | 7.000  | 0.0002662825424267   |
| 16 | 3 | 7.250  | -0.0017248473799185  |
| 16 | 3 | 7.500  | -0.0011588318032256  |
| 16 | 3 | 7.750  | -0.0027587435873642  |
| 16 | 3 | 8.000  | -0.0028126775383601  |
| 16 | 3 | 8.250  | -0.0023593432550046  |
| 16 | 3 | 8.500  | -0.0009016227157230  |
| 16 | 3 | 8.750  | 0.0009643140749706   |
| 16 | 3 | 9.000  | -0.0020785844935529  |
| 16 | 3 | 9.250  | -0.0002900138426088  |
| 16 | 3 | 9.500  | 0.0003405253847419   |
| 16 | 3 | 9.750  | -0.0003195420856821  |
| 16 | 3 | 10.000 | -0.0004754943045973  |
| 16 | 3 | 10.250 | -0.0000840590797667  |
| 16 | 3 | 10.500 | 0.0005629710927844   |
| 16 | 3 | 10.750 | -0.0010404212431030  |
| 16 | 3 | 11.000 | -0.0113184844809159  |
| 16 | 3 | 11.250 | 0.0030815020222764   |
| 16 | 3 | 11.500 | 0.0018662762819310   |
| 16 | 3 | 11.750 | -0.0031747629487295  |
| 16 | 3 | 12.000 | -0.0002551195475324  |
| 16 | 3 | 12.250 | 0.0021931440495992   |
| 16 | 3 | 12.500 | 0.0023650246941546   |
| 16 | 3 | 12.750 | 0.0012946007299843   |
| 16 | 3 | 13.000 | 0.0000194378472227   |
| 16 | 3 | 13.250 | -0.0006332495885090  |
| 16 | 3 | 13.500 | -0.0007082994836012  |
| 16 | 3 | 13.750 | -0.0004720574446227  |
| 16 | 3 | 14.000 | -0.0001930143486379  |
| 16 | 3 | 14.250 | -0.0000830720006208  |
| 16 | 3 | 14.500 | -0.0001231638075501  |
| 16 | 3 | 14.750 | -0.0002358870297367  |
| 16 | 3 | 15.000 | -0.0003431969439341  |

|    |   |        |                       |
|----|---|--------|-----------------------|
| 16 | 3 | 15.250 | -0.0003830618771421   |
| 16 | 3 | 15.500 | -0.0003595535051378   |
| 16 | 3 | 15.750 | -0.0002936541765367   |
| 16 | 3 | 16.000 | -0.0002065511858755   |
| 16 | 3 | 16.250 | -0.0001158919148482   |
| 16 | 3 | 16.500 | -0.0000247911021224   |
| 16 | 3 | 16.750 | 0.0000672858236171    |
| 16 | 3 | 17.000 | 0.0001609224452512    |
| 16 | 3 | 17.250 | 0.0002527283573363    |
| 16 | 3 | 17.500 | 0.0003233582007082    |
| 16 | 3 | 17.750 | 0.0003495185601600    |
| 16 | 3 | 18.000 | 0.0003079481092348    |
| 16 | 3 | 18.250 | 0.0001880640261521    |
| 16 | 3 | 18.500 | 0.0000299282376193    |
| 16 | 3 | 18.750 | -0.0001136881035239   |
| 16 | 3 | 19.000 | -0.0001899117633250   |
| 16 | 3 | 19.250 | -0.0001634301873173   |
| 16 | 3 | 19.500 | -0.0000694409050825   |
| 16 | 3 | 19.750 | 0.0000391517450626    |
| 16 | 3 | 20.000 | 0.0001094559988326    |
| 16 | 3 | 20.250 | 0.0001039392473250    |
| 16 | 3 | 20.500 | 0.0000461803833133    |
| 16 | 3 | 20.750 | -0.0000249902867834   |
| 16 | 3 | 21.000 | -0.0000708144511610   |
| 16 | 3 | 21.250 | -0.0000639443619752   |
| 16 | 3 | 21.500 | -0.0000225749964053   |
| 16 | 3 | 21.750 | 0.0000238976444994    |
| 16 | 3 | 22.000 | 0.0000462160683486    |
| 16 | 3 | 22.250 | 0.0000242369057356    |
| 16 | 3 | 22.500 | -0.0000258285433075   |
| 16 | 3 | 22.750 | -0.0000786834295639   |
| 16 | 3 | 23.000 | -0.0001088578696752   |
| 16 | 3 | 23.250 | -0.0000993077420191   |
| 16 | 3 | 23.500 | -0.0000673974676383   |
| 16 | 3 | 23.750 | -0.0000392598699665   |
| 16 | 3 | 24.000 | -0.0000411101016958   |
| 16 | 3 | 24.250 | -0.0000898959951098   |
| 16 | 3 | 24.500 | -0.0001654210830623   |
| 16 | 3 | 24.750 | -0.0002379776009564   |
| 16 | 3 | 25.000 | -0.0002775857950176   |
| 16 | 3 | 25.250 | -0.0002632628057155   |
| 16 | 3 | 25.500 | -0.0002107438637663   |
| 16 | 3 | 25.750 | -0.0001450700514816   |
| 16 | 3 | 26.000 | -0.0000913970246661   |
| 16 | 3 | 26.250 | -0.0000683009513992   |
| 16 | 3 | 26.500 | -0.000067153556281    |
| 16 | 3 | 26.750 | -0.0000721583625200   |
| 16 | 3 | 27.000 | -0.0000665585939374   |
| 16 | 3 | 27.250 | -0.0000382916820371   |
| 16 | 3 | 27.500 | 0.0000009441645310    |
| 16 | 3 | 27.750 | 0.0000321641965980    |
| 16 | 3 | 28.000 | 0.0000346189575429    |
| 16 | 3 | 28.250 | -0.0000054679489179   |
| 16 | 3 | 28.500 | -0.0000686629343792   |
| 16 | 3 | 28.750 | -0.0001266156074895   |
| 16 | 3 | 29.000 | -0.0001509268657470   |
| 16 | 3 | 29.250 | -0.0001232153019670   |
| 16 | 3 | 29.500 | -0.0000648210463260   |
| 16 | 3 | 29.750 | -0.0000068494289369   |
| 16 | 3 | 30.000 | 0.0000194699542640    |
| 16 | 6 | 4.000  | -452.9943377524168682 |
| 16 | 6 | 4.250  | -135.0638769636761936 |
| 16 | 6 | 4.500  | -41.1920927995806778  |
| 16 | 6 | 4.750  | -12.2802458244691479  |
| 16 | 6 | 5.000  | -3.5496915847361379   |
| 16 | 6 | 5.250  | -1.0184079350296997   |
| 16 | 6 | 5.500  | -0.2692877701625775   |
| 16 | 6 | 5.750  | -0.1050191879780868   |
| 16 | 6 | 6.000  | -0.0393374626044078   |
| 16 | 6 | 6.250  | 0.0244174758258850    |
| 16 | 6 | 6.500  | -0.0217899731099749   |
| 16 | 6 | 6.750  | 0.0325686294656240    |
| 16 | 6 | 7.000  | 0.0104856004913181    |
| 16 | 6 | 7.250  | 0.0086144253015021    |
| 16 | 6 | 7.500  | 0.0057994564727295    |
| 16 | 6 | 7.750  | 0.0044728008947459    |
| 16 | 6 | 8.000  | 0.0002855271490461    |
| 16 | 6 | 8.250  | 0.0035860356262845    |
| 16 | 6 | 8.500  | -0.0032908734181198   |
| 16 | 6 | 8.750  | -0.0032029505873830   |
| 16 | 6 | 9.000  | -0.0034250971533023   |
| 16 | 6 | 9.250  | 0.0053288168233063    |
| 16 | 6 | 9.500  | 0.0018967174440423    |
| 16 | 6 | 9.750  | 0.0068488360217280    |
| 16 | 6 | 10.000 | 0.0034617575569893    |
| 16 | 6 | 10.250 | 0.0072839727836467    |
| 16 | 6 | 10.500 | -0.0040825826249637   |
| 16 | 6 | 10.750 | 0.0007390750805127    |
| 16 | 6 | 11.000 | -0.0138875477210902   |
| 16 | 6 | 11.250 | -0.0007221300425559   |
| 16 | 6 | 11.500 | -0.0227154883958351   |
| 16 | 6 | 11.750 | 0.0081542630380631    |
| 16 | 6 | 12.000 | -0.0010403610870360   |
| 16 | 6 | 12.250 | -0.0128531575249742   |
| 16 | 6 | 12.500 | -0.0128874144452422   |

|    |   |        |                        |
|----|---|--------|------------------------|
| 16 | 6 | 12.750 | -0.0067008017720864    |
| 16 | 6 | 13.000 | 0.0001693817546999     |
| 16 | 6 | 13.250 | 0.0033991921042236     |
| 16 | 6 | 13.500 | 0.0033961221935990     |
| 16 | 6 | 13.750 | 0.0017371449157104     |
| 16 | 6 | 14.000 | -0.0000098713915131    |
| 16 | 6 | 14.250 | -0.0006285976284925    |
| 16 | 6 | 14.500 | -0.0002882229237046    |
| 16 | 6 | 14.750 | 0.0004971928029941     |
| 16 | 6 | 15.000 | 0.0012142438674356     |
| 16 | 6 | 15.250 | 0.0014653342859764     |
| 16 | 6 | 15.500 | 0.0013134029643482     |
| 16 | 6 | 15.750 | 0.0009356787565499     |
| 16 | 6 | 16.000 | 0.0005069975993032     |
| 16 | 6 | 16.250 | 0.0001698013993596     |
| 16 | 6 | 16.500 | -0.0000517010101547    |
| 16 | 6 | 16.750 | -0.0001614913787656    |
| 16 | 6 | 17.000 | -0.0001628998340256    |
| 16 | 6 | 17.250 | -0.0000671704338101    |
| 16 | 6 | 17.500 | 0.0000827805471822     |
| 16 | 6 | 17.750 | 0.0002366742560353     |
| 16 | 6 | 18.000 | 0.0003447843756162     |
| 16 | 6 | 18.250 | 0.0003691523273783     |
| 16 | 6 | 18.500 | 0.0003175931083689     |
| 16 | 6 | 18.750 | 0.0002092979398028     |
| 16 | 6 | 19.000 | 0.0000638780381695     |
| 16 | 6 | 19.250 | -0.0000990050845799    |
| 16 | 6 | 19.500 | -0.0002618121453304    |
| 16 | 6 | 19.750 | -0.0004073635253716    |
| 16 | 6 | 20.000 | -0.0005178874644183    |
| 16 | 6 | 20.250 | -0.0005817282468737    |
| 16 | 6 | 20.500 | -0.0006138740445348    |
| 16 | 6 | 20.750 | -0.0006361159383469    |
| 16 | 6 | 21.000 | -0.0006698020488101    |
| 16 | 6 | 21.250 | -0.0007292043694533    |
| 16 | 6 | 21.500 | -0.0008013656956449    |
| 16 | 6 | 21.750 | -0.0008664946080815    |
| 16 | 6 | 22.000 | -0.0009042620765846    |
| 16 | 6 | 22.250 | -0.0008994190987874    |
| 16 | 6 | 22.500 | -0.0008594414640912    |
| 16 | 6 | 22.750 | -0.0007979730182085    |
| 16 | 6 | 23.000 | -0.0007287071413078    |
| 16 | 6 | 23.250 | -0.0006642033729615    |
| 16 | 6 | 23.500 | -0.0006112865399911    |
| 16 | 6 | 23.750 | -0.0005750956813807    |
| 16 | 6 | 24.000 | -0.0005603640480460    |
| 16 | 6 | 24.250 | -0.0005683195773342    |
| 16 | 6 | 24.500 | -0.0005879703403425    |
| 16 | 6 | 24.750 | -0.0006053126337068    |
| 16 | 6 | 25.000 | -0.0006063777542248    |
| 16 | 6 | 25.250 | -0.0005805161157157    |
| 16 | 6 | 25.500 | -0.0005309885220283    |
| 16 | 6 | 25.750 | -0.0004643833259429    |
| 16 | 6 | 26.000 | -0.0003869415356305    |
| 16 | 6 | 26.250 | -0.0003049037919181    |
| 16 | 6 | 26.500 | -0.0002252686561626    |
| 16 | 6 | 26.750 | -0.0001548399378030    |
| 16 | 6 | 27.000 | -0.0000999563827524    |
| 16 | 6 | 27.250 | -0.0000678507179258    |
| 16 | 6 | 27.500 | -0.0000711753750558    |
| 16 | 6 | 27.750 | -0.0001242663021628    |
| 16 | 6 | 28.000 | -0.0002414369146364    |
| 16 | 6 | 28.250 | -0.0004237633066656    |
| 16 | 6 | 28.500 | -0.0006194626253058    |
| 16 | 6 | 28.750 | -0.0007636800377432    |
| 16 | 6 | 29.000 | -0.0007913342942191    |
| 16 | 6 | 29.250 | -0.0006640603513807    |
| 16 | 6 | 29.500 | -0.0004524147671585    |
| 16 | 6 | 29.750 | -0.0002540345151335    |
| 16 | 6 | 30.000 | -0.0001662636099761    |
| 16 | 9 | 4.000  | -1503.7751831425296132 |
| 16 | 9 | 4.250  | -546.9034604356193086  |
| 16 | 9 | 4.500  | -199.1282733784925938  |
| 16 | 9 | 4.750  | -70.6197255343734867   |
| 16 | 9 | 5.000  | -24.6487944767335421   |
| 16 | 9 | 5.250  | -8.4664338945861743    |
| 16 | 9 | 5.500  | -2.9197270462188101    |
| 16 | 9 | 5.750  | -1.0472447894388779    |
| 16 | 9 | 6.000  | -0.3972545413400326    |
| 16 | 9 | 6.250  | -0.0197508016649408    |
| 16 | 9 | 6.500  | -0.0485536576130698    |
| 16 | 9 | 6.750  | -0.0429369838715346    |
| 16 | 9 | 7.000  | -0.0181150942069905    |
| 16 | 9 | 7.250  | -0.0144441926530448    |
| 16 | 9 | 7.500  | 0.0036288894041192     |
| 16 | 9 | 7.750  | -0.0117167668753240    |
| 16 | 9 | 8.000  | -0.0003744173389482    |
| 16 | 9 | 8.250  | 0.0041727418649251     |
| 16 | 9 | 8.500  | 0.0085353075984076     |
| 16 | 9 | 8.750  | 0.0093207075343856     |
| 16 | 9 | 9.000  | -0.0000644605292673    |
| 16 | 9 | 9.250  | 0.0090739313742964     |
| 16 | 9 | 9.500  | -0.0148649034815195    |
| 16 | 9 | 9.750  | -0.0063954618972158    |
| 16 | 9 | 10.000 | 0.0082403034675411     |

|    |    |        |                       |
|----|----|--------|-----------------------|
| 16 | 9  | 10.250 | -0.0087497922380879   |
| 16 | 9  | 10.500 | -0.0151958127548767   |
| 16 | 9  | 10.750 | 0.0258193281479711    |
| 16 | 9  | 11.000 | -0.0101999311980081   |
| 16 | 9  | 11.250 | 0.0228180453164016    |
| 16 | 9  | 11.500 | 0.0122873340614754    |
| 16 | 9  | 11.750 | -0.0025167532281157   |
| 16 | 9  | 12.000 | -0.0010149797347009   |
| 16 | 9  | 12.250 | 0.0013327725462671    |
| 16 | 9  | 12.500 | 0.0012474837111809    |
| 16 | 9  | 12.750 | -0.0003034850389223   |
| 16 | 9  | 13.000 | -0.0024992535722541   |
| 16 | 9  | 13.250 | -0.0046861486426594   |
| 16 | 9  | 13.500 | -0.0060069136934131   |
| 16 | 9  | 13.750 | -0.0054604398292184   |
| 16 | 9  | 14.000 | -0.0019881824125524   |
| 16 | 9  | 14.250 | 0.004861148919556     |
| 16 | 9  | 14.500 | 0.0129954748624919    |
| 16 | 9  | 14.750 | 0.0196710713231939    |
| 16 | 9  | 15.000 | 0.0221239278161058    |
| 16 | 9  | 15.250 | 0.0185367692709274    |
| 16 | 9  | 15.500 | 0.0109388188879723    |
| 16 | 9  | 15.750 | 0.0023269020261225    |
| 16 | 9  | 16.000 | -0.0043079576461764   |
| 16 | 9  | 16.250 | -0.0067609737029465   |
| 16 | 9  | 16.500 | -0.0059233966879598   |
| 16 | 9  | 16.750 | -0.0034527028433752   |
| 16 | 9  | 17.000 | -0.0010026448796826   |
| 16 | 9  | 17.250 | 0.0001416196823690    |
| 16 | 9  | 17.500 | 0.0001686321598710    |
| 16 | 9  | 17.750 | -0.0003671514870564   |
| 16 | 9  | 18.000 | -0.0009146628703715   |
| 16 | 9  | 18.250 | -0.0010506182675261   |
| 16 | 9  | 18.500 | -0.0008530741905576   |
| 16 | 9  | 18.750 | -0.0005229105262663   |
| 16 | 9  | 19.000 | -0.0002597806238533   |
| 16 | 9  | 19.250 | -0.0002180150780002   |
| 16 | 9  | 19.500 | -0.0003753708073165   |
| 16 | 9  | 19.750 | -0.0006675864125249   |
| 16 | 9  | 20.000 | -0.0010337542400067   |
| 16 | 9  | 20.250 | -0.0014193886361853   |
| 16 | 9  | 20.500 | -0.0017842651195315   |
| 16 | 9  | 20.750 | -0.0020905195795878   |
| 16 | 9  | 21.000 | -0.0023003429885440   |
| 16 | 9  | 21.250 | -0.0023935092785449   |
| 16 | 9  | 21.500 | -0.0024153788972690   |
| 16 | 9  | 21.750 | -0.0024279380458375   |
| 16 | 9  | 22.000 | -0.0024936329912031   |
| 16 | 9  | 22.250 | -0.0026551140817468   |
| 16 | 9  | 22.500 | -0.0028734739944023   |
| 16 | 9  | 22.750 | -0.0030890096715168   |
| 16 | 9  | 23.000 | -0.0032424957423733   |
| 16 | 9  | 23.250 | -0.0032853720713952   |
| 16 | 9  | 23.500 | -0.0032067929569556   |
| 16 | 9  | 23.750 | -0.0030054262057637   |
| 16 | 9  | 24.000 | -0.0026800221080669   |
| 16 | 9  | 24.250 | -0.0022522307414714   |
| 16 | 9  | 24.500 | -0.0018321379403828   |
| 16 | 9  | 24.750 | -0.0015509787577083   |
| 16 | 9  | 25.000 | -0.0015379138600155   |
| 16 | 9  | 25.250 | -0.0018580746081076   |
| 16 | 9  | 25.500 | -0.0023254438219419   |
| 16 | 9  | 25.750 | -0.0026933521173945   |
| 16 | 9  | 26.000 | -0.0027160487934388   |
| 16 | 9  | 26.250 | -0.0022430207260583   |
| 16 | 9  | 26.500 | -0.0015051131312581   |
| 16 | 9  | 26.750 | -0.0008295965621068   |
| 16 | 9  | 27.000 | -0.0005464900616298   |
| 16 | 9  | 27.250 | -0.0008686825337860   |
| 16 | 9  | 27.500 | -0.0015399898725519   |
| 16 | 9  | 27.750 | -0.0021889869150290   |
| 16 | 9  | 28.000 | -0.0024510078252592   |
| 16 | 9  | 28.250 | -0.0020948390247728   |
| 16 | 9  | 28.500 | -0.0014010048425931   |
| 16 | 9  | 28.750 | -0.0007755998935140   |
| 16 | 9  | 29.000 | -0.0006245947009479   |
| 16 | 9  | 29.250 | -0.0012051555844167   |
| 16 | 9  | 29.500 | -0.0021876059988520   |
| 16 | 9  | 29.750 | -0.0031055341122349   |
| 16 | 9  | 30.000 | -0.0035097954938140   |
| 16 | 12 | 4.000  | 2021.1739083613756520 |
| 16 | 12 | 4.250  | 720.3821688643674861  |
| 16 | 12 | 4.500  | 257.6162156830505410  |
| 16 | 12 | 4.750  | 90.1117231154203182   |
| 16 | 12 | 5.000  | 31.0289493450136433   |
| 16 | 12 | 5.250  | 10.5848604229936427   |
| 16 | 12 | 5.500  | 3.7484704196976963    |
| 16 | 12 | 5.750  | 1.2862071423055568    |
| 16 | 12 | 6.000  | 0.4663221135681397    |
| 16 | 12 | 6.250  | 0.0694290470092369    |
| 16 | 12 | 6.500  | 0.0771933687416411    |
| 16 | 12 | 6.750  | 0.0300767438548633    |
| 16 | 12 | 7.000  | -0.0140386270613391   |
| 16 | 12 | 7.250  | 0.0147426445003020    |
| 16 | 12 | 7.500  | -0.0004768245220248   |

|    |    |        |                      |
|----|----|--------|----------------------|
| 16 | 12 | 7.750  | -0.0278620446594644  |
| 16 | 12 | 8.000  | -0.0021377168476384  |
| 16 | 12 | 8.250  | -0.0071893268986187  |
| 16 | 12 | 8.500  | -0.0098536784758991  |
| 16 | 12 | 8.750  | -0.0076714254048795  |
| 16 | 12 | 9.000  | 0.0051715030329689   |
| 16 | 12 | 9.250  | -0.0057021385179326  |
| 16 | 12 | 9.500  | 0.0091253086383176   |
| 16 | 12 | 9.750  | 0.0152868894436828   |
| 16 | 12 | 10.000 | -0.0031849826183930  |
| 16 | 12 | 10.250 | 0.0077007540476330   |
| 16 | 12 | 10.500 | 0.0046802556317225   |
| 16 | 12 | 10.750 | 0.0023459011812061   |
| 16 | 12 | 11.000 | 0.0401456441903321   |
| 16 | 12 | 11.250 | -0.0185579047907467  |
| 16 | 12 | 11.500 | 0.0186466905262623   |
| 16 | 12 | 11.750 | -0.0114337651351466  |
| 16 | 12 | 12.000 | -0.0010554129987161  |
| 16 | 12 | 12.250 | 0.0126582025478728   |
| 16 | 12 | 12.500 | 0.0135670162022148   |
| 16 | 12 | 12.750 | 0.0080440353101192   |
| 16 | 12 | 13.000 | 0.0020844652960346   |
| 16 | 12 | 13.250 | 0.0001943169159371   |
| 16 | 12 | 13.500 | 0.0015476369331107   |
| 16 | 12 | 13.750 | 0.0040257544411477   |
| 16 | 12 | 14.000 | 0.0055689787850848   |
| 16 | 12 | 14.250 | 0.0047234688220890   |
| 16 | 12 | 14.500 | 0.0022216398717734   |
| 16 | 12 | 14.750 | -0.0006802897035927  |
| 16 | 12 | 15.000 | -0.0027376324664312  |
| 16 | 12 | 15.250 | -0.0030379692806168  |
| 16 | 12 | 15.500 | -0.0019778724095350  |
| 16 | 12 | 15.750 | -0.0002796344579004  |
| 16 | 12 | 16.000 | 0.0013405340556778   |
| 16 | 12 | 16.250 | 0.0023002422495848   |
| 16 | 12 | 16.500 | 0.0025224814290206   |
| 16 | 12 | 16.750 | 0.0020527475929153   |
| 16 | 12 | 17.000 | 0.0009354293481056   |
| 16 | 12 | 17.250 | -0.0007267044327459  |
| 16 | 12 | 17.500 | -0.0026002935421933  |
| 16 | 12 | 17.750 | -0.0042945436344782  |
| 16 | 12 | 18.000 | -0.0054188556174892  |
| 16 | 12 | 18.250 | -0.0056862934938764  |
| 16 | 12 | 18.500 | -0.0052249471793024  |
| 16 | 12 | 18.750 | -0.0042663802652021  |
| 16 | 12 | 19.000 | -0.0030417771611763  |
| 16 | 12 | 19.250 | -0.0017673653856488  |
| 16 | 12 | 19.500 | -0.0005974652678140  |
| 16 | 12 | 19.750 | 0.0003295098314507   |
| 16 | 12 | 20.000 | 0.0008762532149965   |
| 16 | 12 | 20.250 | 0.0009572538758598   |
| 16 | 12 | 20.500 | 0.0006928174954026   |
| 16 | 12 | 20.750 | 0.0002551444627641   |
| 16 | 12 | 21.000 | -0.0001810348944946  |
| 16 | 12 | 21.250 | -0.0004674785044536  |
| 16 | 12 | 21.500 | -0.0005706702470229  |
| 16 | 12 | 21.750 | -0.0004876251072845  |
| 16 | 12 | 22.000 | -0.0002158556383489  |
| 16 | 12 | 22.250 | 0.0002182178449889   |
| 16 | 12 | 22.500 | 0.0006758123517871   |
| 16 | 12 | 22.750 | 0.0009902073212044   |
| 16 | 12 | 23.000 | 0.0009955066388749   |
| 16 | 12 | 23.250 | 0.0006018095457559   |
| 16 | 12 | 23.500 | 0.0000198087293411   |
| 16 | 12 | 23.750 | -0.0004648967249418  |
| 16 | 12 | 24.000 | -0.0005668574126082  |
| 16 | 12 | 24.250 | -0.0001047219072486  |
| 16 | 12 | 24.500 | 0.0006880084513162   |
| 16 | 12 | 24.750 | 0.0014739868632209   |
| 16 | 12 | 25.000 | 0.0019159194514740   |
| 16 | 12 | 25.250 | 0.0017675378153833   |
| 16 | 12 | 25.500 | 0.0011459785279736   |
| 16 | 12 | 25.750 | 0.0002600529134379   |
| 16 | 12 | 26.000 | -0.0006798999481128  |
| 16 | 12 | 26.250 | -0.0014838691403564  |
| 16 | 12 | 26.500 | -0.0020423731488248  |
| 16 | 12 | 26.750 | -0.0022654026145334  |
| 16 | 12 | 27.000 | -0.0020603257795527  |
| 16 | 12 | 27.250 | -0.0013928102450369  |
| 16 | 12 | 27.500 | -0.0004707479924088  |
| 16 | 12 | 27.750 | 0.0004367017974964   |
| 16 | 12 | 28.000 | 0.0010603511737453   |
| 16 | 12 | 28.250 | 0.0012065368955110   |
| 16 | 12 | 28.500 | 0.0009849573896250   |
| 16 | 12 | 28.750 | 0.0005847161660104   |
| 16 | 12 | 29.000 | 0.0002012211885054   |
| 16 | 12 | 29.250 | -0.0000079483492690  |
| 16 | 12 | 29.500 | -0.0000638183698008  |
| 16 | 12 | 29.750 | -0.0000391488134329  |
| 16 | 12 | 30.000 | -0.0000130556307531  |
| 17 | 0  | 4.000  | -54.3829669529288822 |
| 17 | 0  | 4.250  | -17.1007578698939824 |
| 17 | 0  | 4.500  | -5.5496927422967701  |
| 17 | 0  | 4.750  | -1.7776939965212932  |
| 17 | 0  | 5.000  | -0.5581312661834659  |

|    |   |        |                     |
|----|---|--------|---------------------|
| 17 | 0 | 5.250  | -0.1805453927433120 |
| 17 | 0 | 5.500  | -0.0591181509191721 |
| 17 | 0 | 5.750  | -0.0144688306084095 |
| 17 | 0 | 6.000  | -0.0073925057967503 |
| 17 | 0 | 6.250  | -0.0015176336635132 |
| 17 | 0 | 6.500  | -0.0002190918588596 |
| 17 | 0 | 6.750  | 0.0013178644209866  |
| 17 | 0 | 7.000  | 0.0001511411449173  |
| 17 | 0 | 7.250  | 0.0020660887464388  |
| 17 | 0 | 7.500  | 0.0004676287888419  |
| 17 | 0 | 7.750  | 0.0005405805909051  |
| 17 | 0 | 8.000  | 0.0002611288065832  |
| 17 | 0 | 8.250  | 0.0008570420795255  |
| 17 | 0 | 8.500  | 0.0007119461465126  |
| 17 | 0 | 8.750  | 0.0002467409184579  |
| 17 | 0 | 9.000  | 0.0004939888019626  |
| 17 | 0 | 9.250  | 0.0008628041501135  |
| 17 | 0 | 9.500  | -0.0003061513100313 |
| 17 | 0 | 9.750  | 0.0002167171801564  |
| 17 | 0 | 10.000 | 0.0001152281464163  |
| 17 | 0 | 10.250 | 0.0001034873902499  |
| 17 | 0 | 10.500 | -0.0003042564343857 |
| 17 | 0 | 10.750 | 0.0006922770893085  |
| 17 | 0 | 11.000 | -0.0045241515002979 |
| 17 | 0 | 11.250 | 0.0044703638857382  |
| 17 | 0 | 11.500 | 0.0001927945708203  |
| 17 | 0 | 11.750 | 0.0021339758048232  |
| 17 | 0 | 12.000 | -0.0003284023613871 |
| 17 | 0 | 12.250 | -0.0024311236611567 |
| 17 | 0 | 12.500 | -0.0023889808456168 |
| 17 | 0 | 12.750 | -0.0012205102145761 |
| 17 | 0 | 13.000 | 0.0000541267857176  |
| 17 | 0 | 13.250 | 0.0006338321948812  |
| 17 | 0 | 13.500 | 0.0006053260562700  |
| 17 | 0 | 13.750 | 0.0002785462331343  |
| 17 | 0 | 14.000 | -0.0000358147316364 |
| 17 | 0 | 14.250 | -0.0000991552025394 |
| 17 | 0 | 14.500 | 0.0000373592748529  |
| 17 | 0 | 14.750 | 0.0002500091150127  |
| 17 | 0 | 15.000 | 0.0004150038211340  |
| 17 | 0 | 15.250 | 0.0004394715131908  |
| 17 | 0 | 15.500 | 0.0003543966255032  |
| 17 | 0 | 15.750 | 0.0002217665416523  |
| 17 | 0 | 16.000 | 0.0001036285870035  |
| 17 | 0 | 16.250 | 0.0000483078794374  |
| 17 | 0 | 16.500 | 0.0000490303232265  |
| 17 | 0 | 16.750 | 0.0000852159054797  |
| 17 | 0 | 17.000 | 0.0001362840036829  |
| 17 | 0 | 17.250 | 0.0001844171525421  |
| 17 | 0 | 17.500 | 0.0002228729398928  |
| 17 | 0 | 17.750 | 0.0002476623029132  |
| 17 | 0 | 18.000 | 0.0002547926452795  |
| 17 | 0 | 18.250 | 0.0002420606719257  |
| 17 | 0 | 18.500 | 0.0002144041159459  |
| 17 | 0 | 18.750 | 0.0001785492222807  |
| 17 | 0 | 19.000 | 0.0001412015515868  |
| 17 | 0 | 19.250 | 0.0001080252899835  |
| 17 | 0 | 19.500 | 0.0000805248458746  |
| 17 | 0 | 19.750 | 0.0000591731604670  |
| 17 | 0 | 20.000 | 0.0000444418732646  |
| 17 | 0 | 20.250 | 0.0000359519020489  |
| 17 | 0 | 20.500 | 0.0000299990958012  |
| 17 | 0 | 20.750 | 0.0000220586875040  |
| 17 | 0 | 21.000 | 0.0000076187782543  |
| 17 | 0 | 21.250 | -0.0000161093548450 |
| 17 | 0 | 21.500 | -0.0000450769565105 |
| 17 | 0 | 21.750 | -0.0000735294461276 |
| 17 | 0 | 22.000 | -0.0000956996137580 |
| 17 | 0 | 22.250 | -0.0001069383482828 |
| 17 | 0 | 22.500 | -0.0001071955669034 |
| 17 | 0 | 22.750 | -0.0000976018414232 |
| 17 | 0 | 23.000 | -0.0000793440614816 |
| 17 | 0 | 23.250 | -0.0000550320323153 |
| 17 | 0 | 23.500 | -0.0000328631286381 |
| 17 | 0 | 23.750 | -0.0000223903527560 |
| 17 | 0 | 24.000 | -0.0000331844806557 |
| 17 | 0 | 24.250 | -0.0000698815150891 |
| 17 | 0 | 24.500 | -0.0001172284733577 |
| 17 | 0 | 24.750 | -0.0001549338590573 |
| 17 | 0 | 25.000 | -0.0001626177685026 |
| 17 | 0 | 25.250 | -0.0001268062569086 |
| 17 | 0 | 25.500 | -0.0000617923346372 |
| 17 | 0 | 25.750 | 0.0000111939400360  |
| 17 | 0 | 26.000 | 0.0000710382219680  |
| 17 | 0 | 26.250 | 0.0001013599607582  |
| 17 | 0 | 26.500 | 0.0001042625640187  |
| 17 | 0 | 26.750 | 0.0000864136419656  |
| 17 | 0 | 27.000 | 0.0000545114845215  |
| 17 | 0 | 27.250 | 0.0000161526922356  |
| 17 | 0 | 27.500 | -0.0000177731614774 |
| 17 | 0 | 27.750 | -0.0000356622947580 |
| 17 | 0 | 28.000 | -0.0000260139173952 |
| 17 | 0 | 28.250 | 0.0000166417938903  |
| 17 | 0 | 28.500 | 0.0000737907760440  |
| 17 | 0 | 28.750 | 0.0001208688637469  |

|    |   |        |                       |
|----|---|--------|-----------------------|
| 17 | 0 | 29.000 | 0.0001331661109206    |
| 17 | 0 | 29.250 | 0.0000952307049382    |
| 17 | 0 | 29.500 | 0.0000291527320523    |
| 17 | 0 | 29.750 | -0.0000335410301296   |
| 17 | 0 | 30.000 | -0.0000614108642594   |
| 17 | 3 | 4.000  | -395.7065342210498784 |
| 17 | 3 | 4.250  | -131.6978057763399192 |
| 17 | 3 | 4.500  | -45.0072320474037042  |
| 17 | 3 | 4.750  | -15.1477479870172829  |
| 17 | 3 | 5.000  | -4.9987133821575753   |
| 17 | 3 | 5.250  | -1.6314270214238604   |
| 17 | 3 | 5.500  | -0.5381909833652117   |
| 17 | 3 | 5.750  | -0.1722345217889369   |
| 17 | 3 | 6.000  | -0.0544700518426566   |
| 17 | 3 | 6.250  | -0.0147781134045886   |
| 17 | 3 | 6.500  | -0.0132663333854737   |
| 17 | 3 | 6.750  | 0.0030450213855104    |
| 17 | 3 | 7.000  | 0.0005839896652140    |
| 17 | 3 | 7.250  | 0.0002637519613238    |
| 17 | 3 | 7.500  | 0.0004600183205055    |
| 17 | 3 | 7.750  | 0.0021896989458554    |
| 17 | 3 | 8.000  | 0.0008308388301916    |
| 17 | 3 | 8.250  | 0.0013233873582124    |
| 17 | 3 | 8.500  | 0.0005181282820429    |
| 17 | 3 | 8.750  | 0.0004355189873846    |
| 17 | 3 | 9.000  | 0.0006565774216520    |
| 17 | 3 | 9.250  | -0.0008436402064604   |
| 17 | 3 | 9.500  | 0.0011575614588248    |
| 17 | 3 | 9.750  | 0.0002962026823017    |
| 17 | 3 | 10.000 | -0.0003162505499421   |
| 17 | 3 | 10.250 | 0.0002899381542474    |
| 17 | 3 | 10.500 | 0.0005766767181341    |
| 17 | 3 | 10.750 | 0.0005432913379404    |
| 17 | 3 | 11.000 | 0.005558225580460     |
| 17 | 3 | 11.250 | -0.0046727788730798   |
| 17 | 3 | 11.500 | -0.0039291573262066   |
| 17 | 3 | 11.750 | 0.0038387510536571    |
| 17 | 3 | 12.000 | -0.0002371482133365   |
| 17 | 3 | 12.250 | -0.0038162673421441   |
| 17 | 3 | 12.500 | -0.0038277533665383   |
| 17 | 3 | 12.750 | -0.0019758748501869   |
| 17 | 3 | 13.000 | 0.0000351259371739    |
| 17 | 3 | 13.250 | 0.0008734076668030    |
| 17 | 3 | 13.500 | 0.0007309708491375    |
| 17 | 3 | 13.750 | 0.0001850278181225    |
| 17 | 3 | 14.000 | -0.0001856945794320   |
| 17 | 3 | 14.250 | 0.0000441285011090    |
| 17 | 3 | 14.500 | 0.0006872780456184    |
| 17 | 3 | 14.750 | 0.0014034879009507    |
| 17 | 3 | 15.000 | 0.0018522608589412    |
| 17 | 3 | 15.250 | 0.0017873536887115    |
| 17 | 3 | 15.500 | 0.0013408725071918    |
| 17 | 3 | 15.750 | 0.0007396603157625    |
| 17 | 3 | 16.000 | 0.0002104990479826    |
| 17 | 3 | 16.250 | -0.0000722299758697   |
| 17 | 3 | 16.500 | -0.0001427568536189   |
| 17 | 3 | 16.750 | -0.0000873326187176   |
| 17 | 3 | 17.000 | 0.0000078649699866    |
| 17 | 3 | 17.250 | 0.0000726162243359    |
| 17 | 3 | 17.500 | 0.0001005279572461    |
| 17 | 3 | 17.750 | 0.0001011602721584    |
| 17 | 3 | 18.000 | 0.0000840742853109    |
| 17 | 3 | 18.250 | 0.0000581326542266    |
| 17 | 3 | 18.500 | 0.0000293324978031    |
| 17 | 3 | 18.750 | 0.0000029501382323    |
| 17 | 3 | 19.000 | -0.0000157959242543   |
| 17 | 3 | 19.250 | -0.0000224869424590   |
| 17 | 3 | 19.500 | -0.0000158316941271   |
| 17 | 3 | 19.750 | 0.0000047069086519    |
| 17 | 3 | 20.000 | 0.0000396889334199    |
| 17 | 3 | 20.250 | 0.0000870506890769    |
| 17 | 3 | 20.500 | 0.0001341310868127    |
| 17 | 3 | 20.750 | 0.0001655811776763    |
| 17 | 3 | 21.000 | 0.0001660500934664    |
| 17 | 3 | 21.250 | 0.0001264606455206    |
| 17 | 3 | 21.500 | 0.0000626989020700    |
| 17 | 3 | 21.750 | -0.0000031910723402   |
| 17 | 3 | 22.000 | -0.0000492741662839   |
| 17 | 3 | 22.250 | -0.0000597239961888   |
| 17 | 3 | 22.500 | -0.0000427784803137   |
| 17 | 3 | 22.750 | -0.0000126642974344   |
| 17 | 3 | 23.000 | 0.0000163436706030    |
| 17 | 3 | 23.250 | 0.0000331459823116    |
| 17 | 3 | 23.500 | 0.0000396367911700    |
| 17 | 3 | 23.750 | 0.0000409768801499    |
| 17 | 3 | 24.000 | 0.0000422847818523    |
| 17 | 3 | 24.250 | 0.0000471858230462    |
| 17 | 3 | 24.500 | 0.0000534420519806    |
| 17 | 3 | 24.750 | 0.0000574304612700    |
| 17 | 3 | 25.000 | 0.0000555868004427    |
| 17 | 3 | 25.250 | 0.0000459983852687    |
| 17 | 3 | 25.500 | 0.0000333570440717    |
| 17 | 3 | 25.750 | 0.0000239789271180    |
| 17 | 3 | 26.000 | 0.0000242284627601    |
| 17 | 3 | 26.250 | 0.0000383564838813    |



|    |   |        |                      |
|----|---|--------|----------------------|
| 17 | 3 | 26.500 | 0.0000618165954544   |
| 17 | 3 | 26.750 | 0.0000878196902870   |
| 17 | 3 | 27.000 | 0.0001095141770743   |
| 17 | 3 | 27.250 | 0.0001216146489293   |
| 17 | 3 | 27.500 | 0.0001248871905433   |
| 17 | 3 | 27.750 | 0.0001215961252523   |
| 17 | 3 | 28.000 | 0.0001138379300580   |
| 17 | 3 | 28.250 | 0.0001029818777276   |
| 17 | 3 | 28.500 | 0.0000883473166500   |
| 17 | 3 | 28.750 | 0.0000689549247806   |
| 17 | 3 | 29.000 | 0.0000440407327029   |
| 17 | 3 | 29.250 | 0.0000141474152114   |
| 17 | 3 | 29.500 | -0.0000154483613068  |
| 17 | 3 | 29.750 | -0.0000381983911833  |
| 17 | 3 | 30.000 | -0.0000473168855330  |
| 17 | 6 | 4.000  | 895.8963071700045475 |
| 17 | 6 | 4.250  | 300.0182112594994805 |
| 17 | 6 | 4.500  | 101.6283084547819726 |
| 17 | 6 | 4.750  | 33.6878818435015432  |
| 17 | 6 | 5.000  | 10.9501157573575369  |
| 17 | 6 | 5.250  | 3.5550592639198157   |
| 17 | 6 | 5.500  | 1.1404677486055874   |
| 17 | 6 | 5.750  | 0.3821237551288377   |
| 17 | 6 | 6.000  | 0.1151721766393692   |
| 17 | 6 | 6.250  | 0.0795594972418669   |
| 17 | 6 | 6.500  | 0.0433364994460135   |
| 17 | 6 | 6.750  | 0.0054565816979562   |
| 17 | 6 | 7.000  | -0.0045720314923940  |
| 17 | 6 | 7.250  | -0.0064878161235242  |
| 17 | 6 | 7.500  | -0.0050159330445219  |
| 17 | 6 | 7.750  | -0.0071445637522771  |
| 17 | 6 | 8.000  | -0.0088520864276225  |
| 17 | 6 | 8.250  | -0.0044967814467114  |
| 17 | 6 | 8.500  | -0.0040421750240783  |
| 17 | 6 | 8.750  | -0.0042646955288170  |
| 17 | 6 | 9.000  | -0.0007680949001729  |
| 17 | 6 | 9.250  | -0.0038819776023791  |
| 17 | 6 | 9.500  | 0.0036768893767547   |
| 17 | 6 | 9.750  | 0.0029086381833827   |
| 17 | 6 | 10.000 | 0.0062665009856058   |
| 17 | 6 | 10.250 | 0.0018873406658755   |
| 17 | 6 | 10.500 | -0.0029266975799703  |
| 17 | 6 | 10.750 | -0.0020934035994409  |
| 17 | 6 | 11.000 | -0.0004463705031708  |
| 17 | 6 | 11.250 | 0.0010583262110511   |
| 17 | 6 | 11.500 | 0.0127551445944514   |
| 17 | 6 | 11.750 | -0.0033592432761977  |
| 17 | 6 | 12.000 | -0.0003238091522330  |
| 17 | 6 | 12.250 | 0.0047951887807445   |
| 17 | 6 | 12.500 | 0.0050565121516277   |
| 17 | 6 | 12.750 | 0.0027118589409429   |
| 17 | 6 | 13.000 | 0.0000079345249141   |
| 17 | 6 | 13.250 | -0.0012940849968039  |
| 17 | 6 | 13.500 | -0.0013039826180663  |
| 17 | 6 | 13.750 | -0.0005911393745944  |
| 17 | 6 | 14.000 | 0.0002798512177214   |
| 17 | 6 | 14.250 | 0.0008524976533385   |
| 17 | 6 | 14.500 | 0.0010948441245395   |
| 17 | 6 | 14.750 | 0.0010807942133678   |
| 17 | 6 | 15.000 | 0.0008841465417043   |
| 17 | 6 | 15.250 | 0.0005809340218137   |
| 17 | 6 | 15.500 | 0.0002564118461200   |
| 17 | 6 | 15.750 | -0.0000016378325035  |
| 17 | 6 | 16.000 | -0.0001046113918794  |
| 17 | 6 | 16.250 | 0.0000014795342970   |
| 17 | 6 | 16.500 | 0.0002282008328817   |
| 17 | 6 | 16.750 | 0.0004510507914158   |
| 17 | 6 | 17.000 | 0.0005453742167616   |
| 17 | 6 | 17.250 | 0.0004297925844392   |
| 17 | 6 | 17.500 | 0.0001950616073876   |
| 17 | 6 | 17.750 | -0.0000254975289405  |
| 17 | 6 | 18.000 | -0.0000991447398594  |
| 17 | 6 | 18.250 | 0.0000603626396025   |
| 17 | 6 | 18.500 | 0.0003553492980081   |
| 17 | 6 | 18.750 | 0.0006426485733387   |
| 17 | 6 | 19.000 | 0.0007794578008381   |
| 17 | 6 | 19.250 | 0.0006667893231753   |
| 17 | 6 | 19.500 | 0.0003800748761327   |
| 17 | 6 | 19.750 | 0.0000380275059708   |
| 17 | 6 | 20.000 | -0.0002409618474076  |
| 17 | 6 | 20.250 | -0.0003677117326713  |
| 17 | 6 | 20.500 | -0.0003686965175860  |
| 17 | 6 | 20.750 | -0.0002990699240698  |
| 17 | 6 | 21.000 | -0.0002139608909919  |
| 17 | 6 | 21.250 | -0.0001574462333747  |
| 17 | 6 | 21.500 | -0.0001293689827144  |
| 17 | 6 | 21.750 | -0.0001185395132334  |
| 17 | 6 | 22.000 | -0.0001136664900495  |
| 17 | 6 | 22.250 | -0.000104945977861   |
| 17 | 6 | 22.500 | -0.0000885543576362  |
| 17 | 6 | 22.750 | -0.0000621843912927  |
| 17 | 6 | 23.000 | -0.0000235035646548  |
| 17 | 6 | 23.250 | 0.0000252588268952   |
| 17 | 6 | 23.500 | 0.0000632587117071   |
| 17 | 6 | 23.750 | 0.0000648508254969   |

|    |   |        |                      |
|----|---|--------|----------------------|
| 17 | 6 | 24.000 | 0.0000041857462600   |
| 17 | 6 | 24.250 | -0.0001325218235513  |
| 17 | 6 | 24.500 | -0.0003103605510468  |
| 17 | 6 | 24.750 | -0.0004821722456879  |
| 17 | 6 | 25.000 | -0.0006009909488018  |
| 17 | 6 | 25.250 | -0.0006323929224565  |
| 17 | 6 | 25.500 | -0.0005910921317160  |
| 17 | 6 | 25.750 | -0.0005039150100942  |
| 17 | 6 | 26.000 | -0.0003975541854978  |
| 17 | 6 | 26.250 | -0.0002965674830214  |
| 17 | 6 | 26.500 | -0.0002165373847903  |
| 17 | 6 | 26.750 | -0.0001706999159717  |
| 17 | 6 | 27.000 | -0.0001720011310846  |
| 17 | 6 | 27.250 | -0.0002238806964923  |
| 17 | 6 | 27.500 | -0.0002923833456794  |
| 17 | 6 | 27.750 | -0.0003342237583241  |
| 17 | 6 | 28.000 | -0.0003061013570706  |
| 17 | 6 | 28.250 | -0.0001823642501752  |
| 17 | 6 | 28.500 | -0.0000087884758651  |
| 17 | 6 | 28.750 | 0.0001509593479446   |
| 17 | 6 | 29.000 | 0.0002333666148612   |
| 17 | 6 | 29.250 | 0.0001972019875950   |
| 17 | 6 | 29.500 | 0.0000886207719532   |
| 17 | 6 | 29.750 | -0.0000250505094940  |
| 17 | 6 | 30.000 | -0.0000775819443600  |
| 17 | 9 | 4.000  | -91.5984816779853190 |
| 17 | 9 | 4.250  | -33.1358957495011737 |
| 17 | 9 | 4.500  | -9.0091777156217177  |
| 17 | 9 | 4.750  | -1.9459519112984935  |
| 17 | 9 | 5.000  | -0.2406249875878075  |
| 17 | 9 | 5.250  | 0.0085561447972395   |
| 17 | 9 | 5.500  | 0.0658702277620193   |
| 17 | 9 | 5.750  | 0.0299734870499435   |
| 17 | 9 | 6.000  | 0.0261710113631182   |
| 17 | 9 | 6.250  | 0.0175901312053952   |
| 17 | 9 | 6.500  | 0.0059818578332056   |
| 17 | 9 | 6.750  | 0.0040318327307745   |
| 17 | 9 | 7.000  | 0.0002183853721931   |
| 17 | 9 | 7.250  | 0.0217229358133757   |
| 17 | 9 | 7.500  | -0.0011439886655218  |
| 17 | 9 | 7.750  | 0.0033539533400635   |
| 17 | 9 | 8.000  | 0.0108635353055897   |
| 17 | 9 | 8.250  | 0.0060547939735611   |
| 17 | 9 | 8.500  | 0.0017878643810133   |
| 17 | 9 | 8.750  | -0.0007845950376541  |
| 17 | 9 | 9.000  | 0.0064618476092082   |
| 17 | 9 | 9.250  | -0.0083468524622261  |
| 17 | 9 | 9.500  | -0.0024902295713223  |
| 17 | 9 | 9.750  | -0.0042540991187515  |
| 17 | 9 | 10.000 | -0.0059665399050468  |
| 17 | 9 | 10.250 | -0.0029195739233449  |
| 17 | 9 | 10.500 | -0.0060338465535284  |
| 17 | 9 | 10.750 | 0.0039813505042776   |
| 17 | 9 | 11.000 | -0.0446832848257906  |
| 17 | 9 | 11.250 | -0.0183303722877841  |
| 17 | 9 | 11.500 | 0.0099135943912442   |
| 17 | 9 | 11.750 | 0.0045931612766735   |
| 17 | 9 | 12.000 | -0.0004252260837049  |
| 17 | 9 | 12.250 | -0.0019208054806180  |
| 17 | 9 | 12.500 | -0.0020288813113148  |
| 17 | 9 | 12.750 | -0.0013118773389347  |
| 17 | 9 | 13.000 | -0.0002711912900523  |
| 17 | 9 | 13.250 | 0.0006823004242529   |
| 17 | 9 | 13.500 | 0.0011242152983916   |
| 17 | 9 | 13.750 | 0.0005889740531479   |
| 17 | 9 | 14.000 | -0.0014128743194883  |
| 17 | 9 | 14.250 | -0.0050654134605040  |
| 17 | 9 | 14.500 | -0.0092799182857648  |
| 17 | 9 | 14.750 | -0.0126446058606799  |
| 17 | 9 | 15.000 | -0.0137396446466847  |
| 17 | 9 | 15.250 | -0.0116466771173592  |
| 17 | 9 | 15.500 | -0.0074773776748657  |
| 17 | 9 | 15.750 | -0.0028518533896935  |
| 17 | 9 | 16.000 | 0.0006155870041006   |
| 17 | 9 | 16.250 | 0.0017466047776783   |
| 17 | 9 | 16.500 | 0.0010756586883447   |
| 17 | 9 | 16.750 | -0.0004393728619655  |
| 17 | 9 | 17.000 | -0.0018429262853104  |
| 17 | 9 | 17.250 | -0.0023900519079092  |
| 17 | 9 | 17.500 | -0.0021769652930300  |
| 17 | 9 | 17.750 | -0.0015097302212540  |
| 17 | 9 | 18.000 | -0.0006933329607889  |
| 17 | 9 | 18.250 | 0.0000091961304150   |
| 17 | 9 | 18.500 | 0.0004994291887013   |
| 17 | 9 | 18.750 | 0.0007189414186901   |
| 17 | 9 | 19.000 | 0.0006081743895735   |
| 17 | 9 | 19.250 | 0.0001484189312288   |
| 17 | 9 | 19.500 | -0.0005106483591315  |
| 17 | 9 | 19.750 | -0.0011761612215537  |
| 17 | 9 | 20.000 | -0.0016539641303206  |
| 17 | 9 | 20.250 | -0.0018010716812303  |
| 17 | 9 | 20.500 | -0.0016826800663539  |
| 17 | 9 | 20.750 | -0.0014166583139186  |
| 17 | 9 | 21.000 | -0.0011211702561191  |
| 17 | 9 | 21.250 | -0.0008904379225699  |

|    |    |        |                       |
|----|----|--------|-----------------------|
| 17 | 9  | 21.500 | -0.0007220666424674   |
| 17 | 9  | 21.750 | -0.0005891820677997   |
| 17 | 9  | 22.000 | -0.0004640588075556   |
| 17 | 9  | 22.250 | -0.0003267437871733   |
| 17 | 9  | 22.500 | -0.0001926686258552   |
| 17 | 9  | 22.750 | -0.0000866814624332   |
| 17 | 9  | 23.000 | -0.0000342196166225   |
| 17 | 9  | 23.250 | -0.0000546054190209   |
| 17 | 9  | 23.500 | -0.0001405899254081   |
| 17 | 9  | 23.750 | -0.0002780147060770   |
| 17 | 9  | 24.000 | -0.0004522945298980   |
| 17 | 9  | 24.250 | -0.0006457559113580   |
| 17 | 9  | 24.500 | -0.0008283605947609   |
| 17 | 9  | 24.750 | -0.0009670567323957   |
| 17 | 9  | 25.000 | -0.0010284724418983   |
| 17 | 9  | 25.250 | -0.0009911634502413   |
| 17 | 9  | 25.500 | -0.0008828310271421   |
| 17 | 9  | 25.750 | -0.0007438541264831   |
| 17 | 9  | 26.000 | -0.0006149461272012   |
| 17 | 9  | 26.250 | -0.0005345525025773   |
| 17 | 9  | 26.500 | -0.0005317590928501   |
| 17 | 9  | 26.750 | -0.0006333958723842   |
| 17 | 9  | 27.000 | -0.0008665676933520   |
| 17 | 9  | 27.250 | -0.0012302480403125   |
| 17 | 9  | 27.500 | -0.0016104712176370   |
| 17 | 9  | 27.750 | -0.0018657174737949   |
| 17 | 9  | 28.000 | -0.0018553411067176   |
| 17 | 9  | 28.250 | -0.0014976600288959   |
| 17 | 9  | 28.500 | -0.0009453226478485   |
| 17 | 9  | 28.750 | -0.0004103408307104   |
| 17 | 9  | 29.000 | -0.0001067587252591   |
| 17 | 9  | 29.250 | -0.0001790750181835   |
| 17 | 9  | 29.500 | -0.0004883241451550   |
| 17 | 9  | 29.750 | -0.0008250899929594   |
| 17 | 9  | 30.000 | -0.0009828804482760   |
| 17 | 12 | 4.000  | -613.078951066773357  |
| 17 | 12 | 4.250  | -210.1587265636817392 |
| 17 | 12 | 4.500  | -75.2979728265895574  |
| 17 | 12 | 4.750  | -26.6599743239039526  |
| 17 | 12 | 5.000  | -9.3330716398024833   |
| 17 | 12 | 5.250  | -3.2041505845292022   |
| 17 | 12 | 5.500  | -1.0743723073205729   |
| 17 | 12 | 5.750  | -0.4071679893051510   |
| 17 | 12 | 6.000  | -0.1286545355346789   |
| 17 | 12 | 6.250  | 0.0272185477292908    |
| 17 | 12 | 6.500  | -0.0108514970999352   |
| 17 | 12 | 6.750  | 0.0057622500469421    |
| 17 | 12 | 7.000  | 0.0128620763267335    |
| 17 | 12 | 7.250  | -0.0037477180835026   |
| 17 | 12 | 7.500  | 0.0010212763952806    |
| 17 | 12 | 7.750  | 0.0300349576385077    |
| 17 | 12 | 8.000  | -0.0034077466797166   |
| 17 | 12 | 8.250  | -0.0017956593253863   |
| 17 | 12 | 8.500  | -0.0004022420278824   |
| 17 | 12 | 8.750  | -0.0099799118058224   |
| 17 | 12 | 9.000  | -0.0044072613762656   |
| 17 | 12 | 9.250  | 0.0067946352344210    |
| 17 | 12 | 9.500  | -0.0010751598247321   |
| 17 | 12 | 9.750  | 0.0065330212061747    |
| 17 | 12 | 10.000 | 0.0140651224128094    |
| 17 | 12 | 10.250 | 0.0087706314459279    |
| 17 | 12 | 10.500 | -0.0011834072937709   |
| 17 | 12 | 10.750 | 0.0106542362484753    |
| 17 | 12 | 11.000 | 0.0100789182522899    |
| 17 | 12 | 11.250 | 0.0024884324788775    |
| 17 | 12 | 11.500 | 0.0051060938648614    |
| 17 | 12 | 11.750 | 0.0189433743062356    |
| 17 | 12 | 12.000 | -0.0007211186205722   |
| 17 | 12 | 12.250 | -0.0144288880310536   |
| 17 | 12 | 12.500 | -0.0141413090049619   |
| 17 | 12 | 12.750 | -0.0066889346848413   |
| 17 | 12 | 13.000 | 0.0012292482241755    |
| 17 | 12 | 13.250 | 0.0043862775637947    |
| 17 | 12 | 13.500 | 0.0034752084266429    |
| 17 | 12 | 13.750 | 0.0006840957990518    |
| 17 | 12 | 14.000 | -0.0018075592290062   |
| 17 | 12 | 14.250 | -0.0023508034237273   |
| 17 | 12 | 14.500 | -0.0013365144428895   |
| 17 | 12 | 14.750 | 0.0003464496253221    |
| 17 | 12 | 15.000 | 0.0018166748507342    |
| 17 | 12 | 15.250 | 0.0023916347652590    |
| 17 | 12 | 15.500 | 0.0021716761921861    |
| 17 | 12 | 15.750 | 0.0014501440050766    |
| 17 | 12 | 16.000 | 0.0005176450030086    |
| 17 | 12 | 16.250 | -0.0003719331368898   |
| 17 | 12 | 16.500 | -0.0011033458357557   |
| 17 | 12 | 16.750 | -0.0015943702179947   |
| 17 | 12 | 17.000 | -0.0017608429779908   |
| 17 | 12 | 17.250 | -0.0015597188006608   |
| 17 | 12 | 17.500 | -0.0011166079711087   |
| 17 | 12 | 17.750 | -0.0006000255959593   |
| 17 | 12 | 18.000 | -0.0001783423037257   |
| 17 | 12 | 18.250 | 0.0000302081193195    |
| 17 | 12 | 18.500 | 0.0001082214820232    |
| 17 | 12 | 18.750 | 0.0001883824109198    |

|    |    |        |                     |
|----|----|--------|---------------------|
| 17 | 12 | 19.000 | 0.0004039958608158  |
| 17 | 12 | 19.250 | 0.0008387628792527  |
| 17 | 12 | 19.500 | 0.0013743791190720  |
| 17 | 12 | 19.750 | 0.0018416846075173  |
| 17 | 12 | 20.000 | 0.0020717482718477  |
| 17 | 12 | 20.250 | 0.0019489676524268  |
| 17 | 12 | 20.500 | 0.0015695659104084  |
| 17 | 12 | 20.750 | 0.0010821836033927  |
| 17 | 12 | 21.000 | 0.0006350684231889  |
| 17 | 12 | 21.250 | 0.0003464844770432  |
| 17 | 12 | 21.500 | 0.0002159243623133  |
| 17 | 12 | 21.750 | 0.0002129625900132  |
| 17 | 12 | 22.000 | 0.0003065775709223  |
| 17 | 12 | 22.250 | 0.0004603156169554  |
| 17 | 12 | 22.500 | 0.0006199334061265  |
| 17 | 12 | 22.750 | 0.0007276498684773  |
| 17 | 12 | 23.000 | 0.0007264720682222  |
| 17 | 12 | 23.250 | 0.0005839528057962  |
| 17 | 12 | 23.500 | 0.0003633202502197  |
| 17 | 12 | 23.750 | 0.0001516152065295  |
| 17 | 12 | 24.000 | 0.0000362763200370  |
| 17 | 12 | 24.250 | 0.0000800697334509  |
| 17 | 12 | 24.500 | 0.0002444365697728  |
| 17 | 12 | 24.750 | 0.0004648136964326  |
| 17 | 12 | 25.000 | 0.0006760124667293  |
| 17 | 12 | 25.250 | 0.0008257291272786  |
| 17 | 12 | 25.500 | 0.0009139494663180  |
| 17 | 12 | 25.750 | 0.0009538100211014  |
| 17 | 12 | 26.000 | 0.0009581980295997  |
| 17 | 12 | 26.250 | 0.0009406638823814  |
| 17 | 12 | 26.500 | 0.0009212127248546  |
| 17 | 12 | 26.750 | 0.0009221095134546  |
| 17 | 12 | 27.000 | 0.0009667140325996  |
| 17 | 12 | 27.250 | 0.0010629667312276  |
| 17 | 12 | 27.500 | 0.0011554815764191  |
| 17 | 12 | 27.750 | 0.0011735190644269  |
| 17 | 12 | 28.000 | 0.0010470144260088  |
| 17 | 12 | 28.250 | 0.0007386206989706  |
| 17 | 12 | 28.500 | 0.0003414334014715  |
| 17 | 12 | 28.750 | -0.0000180036147632 |
| 17 | 12 | 29.000 | -0.0002106546848868 |
| 17 | 12 | 29.250 | -0.0001511698743934 |
| 17 | 12 | 29.500 | 0.0000644152120485  |
| 17 | 12 | 29.750 | 0.0002951978234311  |
| 17 | 12 | 30.000 | 0.0004025692011869  |
| 18 | 0  | 4.000  | 61.8643224187562737 |
| 18 | 0  | 4.250  | 19.8533623462881224 |
| 18 | 0  | 4.500  | 6.6130411758358605  |
| 18 | 0  | 4.750  | 2.1815317237878844  |
| 18 | 0  | 5.000  | 0.7046905943811907  |
| 18 | 0  | 5.250  | 0.2300553319350911  |
| 18 | 0  | 5.500  | 0.0692214440427961  |
| 18 | 0  | 5.750  | 0.0242754021689962  |
| 18 | 0  | 6.000  | 0.0084045354688556  |
| 18 | 0  | 6.250  | -0.0001844689544157 |
| 18 | 0  | 6.500  | 0.0016173695819219  |
| 18 | 0  | 6.750  | -0.0002407005805463 |
| 18 | 0  | 7.000  | -0.0009011806181447 |
| 18 | 0  | 7.250  | 0.0001476140709065  |
| 18 | 0  | 7.500  | -0.0003993554685700 |
| 18 | 0  | 7.750  | 0.0002568384416080  |
| 18 | 0  | 8.000  | -0.0001369459109313 |
| 18 | 0  | 8.250  | -0.0006640354749194 |
| 18 | 0  | 8.500  | -0.0005188663902302 |
| 18 | 0  | 8.750  | 0.0003287293661458  |
| 18 | 0  | 9.000  | 0.0000329516965216  |
| 18 | 0  | 9.250  | -0.0001486812486107 |
| 18 | 0  | 9.500  | 0.0006073413439118  |
| 18 | 0  | 9.750  | -0.0000837194851329 |
| 18 | 0  | 10.000 | 0.0002383629365053  |
| 18 | 0  | 10.250 | 0.0000780049132363  |
| 18 | 0  | 10.500 | -0.0001847747124835 |
| 18 | 0  | 10.750 | -0.0000326539601350 |
| 18 | 0  | 11.000 | -0.0004617298120086 |
| 18 | 0  | 11.250 | 0.0003867259922812  |
| 18 | 0  | 11.500 | -0.0004549356333090 |
| 18 | 0  | 11.750 | -0.0016797821175265 |
| 18 | 0  | 12.000 | -0.0000275755778842 |
| 18 | 0  | 12.250 | 0.0011956667937647  |
| 18 | 0  | 12.500 | 0.0013001701275801  |
| 18 | 0  | 12.750 | 0.0007769251076000  |
| 18 | 0  | 13.000 | 0.0001181235305752  |
| 18 | 0  | 13.250 | -0.0002766557455480 |
| 18 | 0  | 13.500 | -0.0003930465189035 |
| 18 | 0  | 13.750 | -0.0003146710231006 |
| 18 | 0  | 14.000 | -0.0001260838255930 |
| 18 | 0  | 14.250 | 0.0000952172221520  |
| 18 | 0  | 14.500 | 0.0003013281062565  |
| 18 | 0  | 14.750 | 0.0004518384583529  |
| 18 | 0  | 15.000 | 0.0005064156330767  |
| 18 | 0  | 15.250 | 0.0004409163592873  |
| 18 | 0  | 15.500 | 0.0002956832452538  |
| 18 | 0  | 15.750 | 0.0001271209509718  |
| 18 | 0  | 16.000 | -0.0000084607976214 |
| 18 | 0  | 16.250 | -0.0000683047175949 |

|    |   |        |                      |
|----|---|--------|----------------------|
| 18 | 0 | 16.500 | -0.0000634297102318  |
| 18 | 0 | 16.750 | -0.0000182453288242  |
| 18 | 0 | 17.000 | 0.0000428725074518   |
| 18 | 0 | 17.250 | 0.0000995363128727   |
| 18 | 0 | 17.500 | 0.0001472568280770   |
| 18 | 0 | 17.750 | 0.0001855182493544   |
| 18 | 0 | 18.000 | 0.0002138087160288   |
| 18 | 0 | 18.250 | 0.0002308579998136   |
| 18 | 0 | 18.500 | 0.0002323734532905   |
| 18 | 0 | 18.750 | 0.0002133122914592   |
| 18 | 0 | 19.000 | 0.0001686370824066   |
| 18 | 0 | 19.250 | 0.0000976164587570   |
| 18 | 0 | 19.500 | 0.0000166912626688   |
| 18 | 0 | 19.750 | -0.0000534074386706  |
| 18 | 0 | 20.000 | -0.0000919398816441  |
| 18 | 0 | 20.250 | -0.0000847132269619  |
| 18 | 0 | 20.500 | -0.0000437426576138  |
| 18 | 0 | 20.750 | 0.0000123931410222   |
| 18 | 0 | 21.000 | 0.0000651184990728   |
| 18 | 0 | 21.250 | 0.0000993785726487   |
| 18 | 0 | 21.500 | 0.0001141853520953   |
| 18 | 0 | 21.750 | 0.0001120905037079   |
| 18 | 0 | 22.000 | 0.0000956544646440   |
| 18 | 0 | 22.250 | 0.0000682781798663   |
| 18 | 0 | 22.500 | 0.0000367245213733   |
| 18 | 0 | 22.750 | 0.0000086173309318   |
| 18 | 0 | 23.000 | -0.0000083840146464  |
| 18 | 0 | 23.250 | -0.0000091043725997  |
| 18 | 0 | 23.500 | 0.0000015642321866   |
| 18 | 0 | 23.750 | 0.0000162006866029   |
| 18 | 0 | 24.000 | 0.0000274172282507   |
| 18 | 0 | 24.250 | 0.0000292768532048   |
| 18 | 0 | 24.500 | 0.0000215325963687   |
| 18 | 0 | 24.750 | 0.0000053661583022   |
| 18 | 0 | 25.000 | -0.0000180227603896  |
| 18 | 0 | 25.250 | -0.0000459016728913  |
| 18 | 0 | 25.500 | -0.0000694912387775  |
| 18 | 0 | 25.750 | -0.0000784975830525  |
| 18 | 0 | 26.000 | -0.0000625896313679  |
| 18 | 0 | 26.250 | -0.0000167881827418  |
| 18 | 0 | 26.500 | 0.0000423812631876   |
| 18 | 0 | 26.750 | 0.0000930219145967   |
| 18 | 0 | 27.000 | 0.0001132745238252   |
| 18 | 0 | 27.250 | 0.0000891752851990   |
| 18 | 0 | 27.500 | 0.0000381426393006   |
| 18 | 0 | 27.750 | -0.0000145778331888  |
| 18 | 0 | 28.000 | -0.0000437470641654  |
| 18 | 0 | 28.250 | -0.0000316264558881  |
| 18 | 0 | 28.500 | 0.0000094781842449   |
| 18 | 0 | 28.750 | 0.0000597539792271   |
| 18 | 0 | 29.000 | 0.0000993959112463   |
| 18 | 0 | 29.250 | 0.0001138338256912   |
| 18 | 0 | 29.500 | 0.0001095296437092   |
| 18 | 0 | 29.750 | 0.0000982469325951   |
| 18 | 0 | 30.000 | 0.0000918442137312   |
| 18 | 3 | 4.000  | -11.1849376502060842 |
| 18 | 3 | 4.250  | -2.5286061072423252  |
| 18 | 3 | 4.500  | -0.6372392640216535  |
| 18 | 3 | 4.750  | -0.1691586787287012  |
| 18 | 3 | 5.000  | -0.0360796028036372  |
| 18 | 3 | 5.250  | -0.0087510882069601  |
| 18 | 3 | 5.500  | -0.0020047464129291  |
| 18 | 3 | 5.750  | 0.0010753336878722   |
| 18 | 3 | 6.000  | -0.0046827024907294  |
| 18 | 3 | 6.250  | -0.0030298231568722  |
| 18 | 3 | 6.500  | 0.0071338271261681   |
| 18 | 3 | 6.750  | -0.0054825389355528  |
| 18 | 3 | 7.000  | 0.0009405414514072   |
| 18 | 3 | 7.250  | 0.0006146916816482   |
| 18 | 3 | 7.500  | -0.0001451561202188  |
| 18 | 3 | 7.750  | -0.0007536392470415  |
| 18 | 3 | 8.000  | -0.0016021573193445  |
| 18 | 3 | 8.250  | -0.0019946979626294  |
| 18 | 3 | 8.500  | 0.0009196422281567   |
| 18 | 3 | 8.750  | 0.0018882330427864   |
| 18 | 3 | 9.000  | -0.0012858189487362  |
| 18 | 3 | 9.250  | 0.0014846661222347   |
| 18 | 3 | 9.500  | 0.0005374662522418   |
| 18 | 3 | 9.750  | 0.0005470742817738   |
| 18 | 3 | 10.000 | -0.0009792997924605  |
| 18 | 3 | 10.250 | 0.0004468199564229   |
| 18 | 3 | 10.500 | 0.0008493295471209   |
| 18 | 3 | 10.750 | 0.0013769528683436   |
| 18 | 3 | 11.000 | -0.0105911011261210  |
| 18 | 3 | 11.250 | 0.0044444930098935   |
| 18 | 3 | 11.500 | 0.0008813844070311   |
| 18 | 3 | 11.750 | 0.0055100351057663   |
| 18 | 3 | 12.000 | 0.0001215842911638   |
| 18 | 3 | 12.250 | -0.0044756564596901  |
| 18 | 3 | 12.500 | -0.0047629179717253  |
| 18 | 3 | 12.750 | -0.0026766868922453  |
| 18 | 3 | 13.000 | -0.0001769079999667  |
| 18 | 3 | 13.250 | 0.0011598303619796   |
| 18 | 3 | 13.500 | 0.0013669871058329   |
| 18 | 3 | 13.750 | 0.0008875258085993   |

|    |   |        |                       |
|----|---|--------|-----------------------|
| 18 | 3 | 14.000 | 0.0001692436379956    |
| 18 | 3 | 14.250 | -0.0004134767958339   |
| 18 | 3 | 14.500 | -0.0007910490544346   |
| 18 | 3 | 14.750 | -0.0009712112437395   |
| 18 | 3 | 15.000 | -0.0009628013724462   |
| 18 | 3 | 15.250 | -0.0007868197211239   |
| 18 | 3 | 15.500 | -0.0005093204450102   |
| 18 | 3 | 15.750 | -0.0002071840145653   |
| 18 | 3 | 16.000 | 0.0000430921645312    |
| 18 | 3 | 16.250 | 0.0001835368020244    |
| 18 | 3 | 16.500 | 0.0002295001605002    |
| 18 | 3 | 16.750 | 0.0002145020838971    |
| 18 | 3 | 17.000 | 0.0001719748264316    |
| 18 | 3 | 17.250 | 0.0001290127819382    |
| 18 | 3 | 17.500 | 0.0000878066099853    |
| 18 | 3 | 17.750 | 0.0000442968147514    |
| 18 | 3 | 18.000 | -0.0000055814534867   |
| 18 | 3 | 18.250 | -0.0000635066931559   |
| 18 | 3 | 18.500 | -0.0001214889849705   |
| 18 | 3 | 18.750 | -0.0001690285316002   |
| 18 | 3 | 19.000 | -0.0001955540406051   |
| 18 | 3 | 19.250 | -0.0001951708984294   |
| 18 | 3 | 19.500 | -0.0001807177926011   |
| 18 | 3 | 19.750 | -0.0001698183522646   |
| 18 | 3 | 20.000 | -0.0001802172462401   |
| 18 | 3 | 20.250 | -0.0002211826813113   |
| 18 | 3 | 20.500 | -0.0002676757174467   |
| 18 | 3 | 20.750 | -0.0002860062890467   |
| 18 | 3 | 21.000 | -0.0002424407753271   |
| 18 | 3 | 21.250 | -0.0001185012027280   |
| 18 | 3 | 21.500 | 0.0000432932963133    |
| 18 | 3 | 21.750 | 0.0001853997380268    |
| 18 | 3 | 22.000 | 0.0002505533324873    |
| 18 | 3 | 22.250 | 0.0002013401607766    |
| 18 | 3 | 22.500 | 0.0000793264443339    |
| 18 | 3 | 22.750 | -0.0000542279858914   |
| 18 | 3 | 23.000 | -0.0001378394019929   |
| 18 | 3 | 23.250 | -0.0001291719897190   |
| 18 | 3 | 23.500 | -0.0000632374331107   |
| 18 | 3 | 23.750 | 0.0000052971413265    |
| 18 | 3 | 24.000 | 0.0000215956254099    |
| 18 | 3 | 24.250 | -0.0000504388516741   |
| 18 | 3 | 24.500 | -0.0001718067721554   |
| 18 | 3 | 24.750 | -0.0002842904321286   |
| 18 | 3 | 25.000 | -0.0003291819305398   |
| 18 | 3 | 25.250 | -0.0002669809733095   |
| 18 | 3 | 25.500 | -0.0001367742301031   |
| 18 | 3 | 25.750 | 0.0000021411030721    |
| 18 | 3 | 26.000 | 0.0000897944654764    |
| 18 | 3 | 26.250 | 0.0000845965297153    |
| 18 | 3 | 26.500 | 0.0000219356930392    |
| 18 | 3 | 26.750 | -0.0000424890855052   |
| 18 | 3 | 27.000 | -0.0000510802489675   |
| 18 | 3 | 27.250 | 0.0000359724453417    |
| 18 | 3 | 27.500 | 0.0001783328126912    |
| 18 | 3 | 27.750 | 0.0003133353296043    |
| 18 | 3 | 28.000 | 0.0003753426443275    |
| 18 | 3 | 28.250 | 0.0003173923233838    |
| 18 | 3 | 28.500 | 0.0001772321995430    |
| 18 | 3 | 28.750 | 0.0000151492952100    |
| 18 | 3 | 29.000 | -0.0001077030112555   |
| 18 | 3 | 29.250 | -0.0001462347012301   |
| 18 | 3 | 29.500 | -0.0001231394213324   |
| 18 | 3 | 29.750 | -0.0000786872332818   |
| 18 | 3 | 30.000 | -0.0000544506604505   |
| 18 | 6 | 4.000  | -641.3667628062498807 |
| 18 | 6 | 4.250  | -208.6052369512406131 |
| 18 | 6 | 4.500  | -70.0830787319434876  |
| 18 | 6 | 4.750  | -23.1728292381951064  |
| 18 | 6 | 5.000  | -7.5066724168981409   |
| 18 | 6 | 5.250  | -2.4005114269378254   |
| 18 | 6 | 5.500  | -0.7813863010454511   |
| 18 | 6 | 5.750  | -0.2516700155573321   |
| 18 | 6 | 6.000  | -0.0802399971035799   |
| 18 | 6 | 6.250  | -0.0021210043063711   |
| 18 | 6 | 6.500  | -0.0207167560719768   |
| 18 | 6 | 6.750  | 0.0170665052079073    |
| 18 | 6 | 7.000  | 0.0017434780927807    |
| 18 | 6 | 7.250  | 0.0070959181370256    |
| 18 | 6 | 7.500  | 0.0058062391385079    |
| 18 | 6 | 7.750  | 0.0028337803270624    |
| 18 | 6 | 8.000  | 0.0023043129239544    |
| 18 | 6 | 8.250  | 0.0044834693016669    |
| 18 | 6 | 8.500  | 0.0017177293931776    |
| 18 | 6 | 8.750  | -0.0036329165904845   |
| 18 | 6 | 9.000  | 0.0003520184692007    |
| 18 | 6 | 9.250  | 0.0079109021693462    |
| 18 | 6 | 9.500  | -0.0020803674324343   |
| 18 | 6 | 9.750  | 0.0052107058733020    |
| 18 | 6 | 10.000 | 0.0032211540306408    |
| 18 | 6 | 10.250 | 0.0055065077305368    |
| 18 | 6 | 10.500 | -0.0024941098549812   |
| 18 | 6 | 10.750 | 0.0000164464757156    |
| 18 | 6 | 11.000 | -0.0077574679279852   |
| 18 | 6 | 11.250 | -0.0091692741020227   |

|    |   |        |                      |
|----|---|--------|----------------------|
| 18 | 6 | 11.500 | -0.0107518740569115  |
| 18 | 6 | 11.750 | 0.0001670658343886   |
| 18 | 6 | 12.000 | -0.0004010856285989  |
| 18 | 6 | 12.250 | -0.0025306675274690  |
| 18 | 6 | 12.500 | -0.0023758776957820  |
| 18 | 6 | 12.750 | -0.0010126398183603  |
| 18 | 6 | 13.000 | 0.0004915013225051   |
| 18 | 6 | 13.250 | 0.0012975881795503   |
| 18 | 6 | 13.500 | 0.0014272591108672   |
| 18 | 6 | 13.750 | 0.0011106677863436   |
| 18 | 6 | 14.000 | 0.0005736046685503   |
| 18 | 6 | 14.250 | 0.0000139693641108   |
| 18 | 6 | 14.500 | -0.0004709695096096  |
| 18 | 6 | 14.750 | -0.0008070843205244  |
| 18 | 6 | 15.000 | -0.0009182120901520  |
| 18 | 6 | 15.250 | -0.0007612760511691  |
| 18 | 6 | 15.500 | -0.0004325165879671  |
| 18 | 6 | 15.750 | -0.0000647078145711  |
| 18 | 6 | 16.000 | 0.0002073247596870   |
| 18 | 6 | 16.250 | 0.0002822760662313   |
| 18 | 6 | 16.500 | 0.0002002678672366   |
| 18 | 6 | 16.750 | 0.0000375857717342   |
| 18 | 6 | 17.000 | -0.0001288832985923  |
| 18 | 6 | 17.250 | -0.0002357377623773  |
| 18 | 6 | 17.500 | -0.0002745594481735  |
| 18 | 6 | 17.750 | -0.0002503367745293  |
| 18 | 6 | 18.000 | -0.0001676125579379  |
| 18 | 6 | 18.250 | -0.0000366721487992  |
| 18 | 6 | 18.500 | 0.0001078060971497   |
| 18 | 6 | 18.750 | 0.0002247711950467   |
| 18 | 6 | 19.000 | 0.0002732149596021   |
| 18 | 6 | 19.250 | 0.0002255168272176   |
| 18 | 6 | 19.500 | 0.0001067663367286   |
| 18 | 6 | 19.750 | -0.0000446898406748  |
| 18 | 6 | 20.000 | -0.0001903187765229  |
| 18 | 6 | 20.250 | -0.0002988263433669  |
| 18 | 6 | 20.500 | -0.0003682442125854  |
| 18 | 6 | 20.750 | -0.0004039551599610  |
| 18 | 6 | 21.000 | -0.0004111801022427  |
| 18 | 6 | 21.250 | -0.0003973620765617  |
| 18 | 6 | 21.500 | -0.0003786450084700  |
| 18 | 6 | 21.750 | -0.0003731189995536  |
| 18 | 6 | 22.000 | -0.0003983568749573  |
| 18 | 6 | 22.250 | -0.0004629309086433  |
| 18 | 6 | 22.500 | -0.0005413771478541  |
| 18 | 6 | 22.750 | -0.0006000546088098  |
| 18 | 6 | 23.000 | -0.0006054025061540  |
| 18 | 6 | 23.250 | -0.0005363869113060  |
| 18 | 6 | 23.500 | -0.0004217569194397  |
| 18 | 6 | 23.750 | -0.0003026103020638  |
| 18 | 6 | 24.000 | -0.0002197799998197  |
| 18 | 6 | 24.250 | -0.0002022942461814  |
| 18 | 6 | 24.500 | -0.0002332612776257  |
| 18 | 6 | 24.750 | -0.0002843767391071  |
| 18 | 6 | 25.000 | -0.0003275692012511  |
| 18 | 6 | 25.250 | -0.0003409922995334  |
| 18 | 6 | 25.500 | -0.0003276976161407  |
| 18 | 6 | 25.750 | -0.0002969390668496  |
| 18 | 6 | 26.000 | -0.0002579078789920  |
| 18 | 6 | 26.250 | -0.0002170377979282  |
| 18 | 6 | 26.500 | -0.0001701193826296  |
| 18 | 6 | 26.750 | -0.0001101609815761  |
| 18 | 6 | 27.000 | -0.0000303332514708  |
| 18 | 6 | 27.250 | 0.0000698078104916   |
| 18 | 6 | 27.500 | 0.0001654396464991   |
| 18 | 6 | 27.750 | 0.0002254146581575   |
| 18 | 6 | 28.000 | 0.0002184272017709   |
| 18 | 6 | 28.250 | 0.0001275436872134   |
| 18 | 6 | 28.500 | -0.0000058940185130  |
| 18 | 6 | 28.750 | -0.0001257992565864  |
| 18 | 6 | 29.000 | -0.0001756803222295  |
| 18 | 6 | 29.250 | -0.0001187771005010  |
| 18 | 6 | 29.500 | 0.0000010792709993   |
| 18 | 6 | 29.750 | 0.0001198483304696   |
| 18 | 6 | 30.000 | 0.0001736213380801   |
| 18 | 9 | 4.000  | 747.0197268914447477 |
| 18 | 9 | 4.250  | 251.7689575816636705 |
| 18 | 9 | 4.500  | 84.8083955055502798  |
| 18 | 9 | 4.750  | 27.7300664902407661  |
| 18 | 9 | 5.000  | 8.7805325719387781   |
| 18 | 9 | 5.250  | 2.7669529465759695   |
| 18 | 9 | 5.500  | 0.9313005925987028   |
| 18 | 9 | 5.750  | 0.2564866663822585   |
| 18 | 9 | 6.000  | 0.0585087775007196   |
| 18 | 9 | 6.250  | 0.1165400712585694   |
| 18 | 9 | 6.500  | 0.0169311215468184   |
| 18 | 9 | 6.750  | -0.0262583178505338  |
| 18 | 9 | 7.000  | -0.0048091527082370  |
| 18 | 9 | 7.250  | -0.0243821240693904  |
| 18 | 9 | 7.500  | -0.0217141957233480  |
| 18 | 9 | 7.750  | -0.0313883628575695  |
| 18 | 9 | 8.000  | -0.0155428236079871  |
| 18 | 9 | 8.250  | -0.0050000278850015  |
| 18 | 9 | 8.500  | 0.0019976981901215   |
| 18 | 9 | 8.750  | -0.0010780766869129  |

|    |    |        |                       |
|----|----|--------|-----------------------|
| 18 | 9  | 9.000  | -0.0028702496735245   |
| 18 | 9  | 9.250  | 0.0046379953646901    |
| 18 | 9  | 9.500  | -0.0093745294145343   |
| 18 | 9  | 9.750  | -0.0011747700045248   |
| 18 | 9  | 10.000 | 0.0036081948478448    |
| 18 | 9  | 10.250 | -0.0003191819395534   |
| 18 | 9  | 10.500 | -0.0070998060986171   |
| 18 | 9  | 10.750 | 0.0204653549963889    |
| 18 | 9  | 11.000 | 0.0154502479589649    |
| 18 | 9  | 11.250 | 0.0082823585085245    |
| 18 | 9  | 11.500 | -0.0035087652947721   |
| 18 | 9  | 11.750 | 0.0141891227190646    |
| 18 | 9  | 12.000 | 0.0000283549339270    |
| 18 | 9  | 12.250 | -0.0123972347645999   |
| 18 | 9  | 12.500 | -0.0132151641799211   |
| 18 | 9  | 12.750 | -0.0077917609488903   |
| 18 | 9  | 13.000 | -0.0015833841776588   |
| 18 | 9  | 13.250 | 0.0010539582621417    |
| 18 | 9  | 13.500 | 0.0006797126027067    |
| 18 | 9  | 13.750 | -0.0008610524881542   |
| 18 | 9  | 14.000 | -0.0016879505702327   |
| 18 | 9  | 14.250 | -0.0004325456292316   |
| 18 | 9  | 14.500 | 0.0021542987543960    |
| 18 | 9  | 14.750 | 0.0047796785628859    |
| 18 | 9  | 15.000 | 0.0061370556767164    |
| 18 | 9  | 15.250 | 0.0053101254631173    |
| 18 | 9  | 15.500 | 0.0029844969221255    |
| 18 | 9  | 15.750 | 0.0002527945792410    |
| 18 | 9  | 16.000 | -0.0017907779584682   |
| 18 | 9  | 16.250 | -0.0023454290861348   |
| 18 | 9  | 16.500 | -0.0017748201926804   |
| 18 | 9  | 16.750 | -0.0007315876715226   |
| 18 | 9  | 17.000 | 0.0001324736506912    |
| 18 | 9  | 17.250 | 0.0003265908355199    |
| 18 | 9  | 17.500 | 0.0000058717603302    |
| 18 | 9  | 17.750 | -0.0005151155068002   |
| 18 | 9  | 18.000 | -0.0009241960075660   |
| 18 | 9  | 18.250 | -0.0009885369191060   |
| 18 | 9  | 18.500 | -0.0007853478459080   |
| 18 | 9  | 18.750 | -0.0004671465680731   |
| 18 | 9  | 19.000 | -0.0001851490575246   |
| 18 | 9  | 19.250 | -0.0000556435543738   |
| 18 | 9  | 19.500 | -0.0000598112968208   |
| 18 | 9  | 19.750 | -0.0001467269901335   |
| 18 | 9  | 20.000 | -0.0002675497653794   |
| 18 | 9  | 20.250 | -0.0003849924351148   |
| 18 | 9  | 20.500 | -0.0005015439856722   |
| 18 | 9  | 20.750 | -0.0006288256251925   |
| 18 | 9  | 21.000 | -0.0007785286451533   |
| 18 | 9  | 21.250 | -0.0009586723591630   |
| 18 | 9  | 21.500 | -0.0011606260864359   |
| 18 | 9  | 21.750 | -0.0013718898672320   |
| 18 | 9  | 22.000 | -0.0015805386281053   |
| 18 | 9  | 22.250 | -0.0017757444717571   |
| 18 | 9  | 22.500 | -0.0019479307489948   |
| 18 | 9  | 22.750 | -0.0020869805559130   |
| 18 | 9  | 23.000 | -0.0021825569252912   |
| 18 | 9  | 23.250 | -0.0022228561557905   |
| 18 | 9  | 23.500 | -0.0021887606541048   |
| 18 | 9  | 23.750 | -0.0020598066013075   |
| 18 | 9  | 24.000 | -0.0018155162386241   |
| 18 | 9  | 24.250 | -0.0014576292956009   |
| 18 | 9  | 24.500 | -0.0010753592581082   |
| 18 | 9  | 24.750 | -0.0007792837272463   |
| 18 | 9  | 25.000 | -0.0006789100985881   |
| 18 | 9  | 25.250 | -0.0008352502369330   |
| 18 | 9  | 25.500 | -0.0011181525659594   |
| 18 | 9  | 25.750 | -0.0013508594486008   |
| 18 | 9  | 26.000 | -0.0013574664924348   |
| 18 | 9  | 26.250 | -0.0010312256109205   |
| 18 | 9  | 26.500 | -0.0005405177113159   |
| 18 | 9  | 26.750 | -0.0001222467325040   |
| 18 | 9  | 27.000 | -0.0000141077324877   |
| 18 | 9  | 27.250 | -0.0003642445640784   |
| 18 | 9  | 27.500 | -0.0009631980375874   |
| 18 | 9  | 27.750 | -0.0015129288109615   |
| 18 | 9  | 28.000 | -0.0017179744650141   |
| 18 | 9  | 28.250 | -0.0013896059955967   |
| 18 | 9  | 28.500 | -0.0007585440027888   |
| 18 | 9  | 28.750 | -0.0001592135292855   |
| 18 | 9  | 29.000 | 0.0000748468092922    |
| 18 | 9  | 29.250 | -0.0002719953190375   |
| 18 | 9  | 29.500 | -0.0009532853690285   |
| 18 | 9  | 29.750 | -0.0016139252757784   |
| 18 | 9  | 30.000 | -0.0019097231379688   |
| 18 | 12 | 4.000  | -536.7062375170701216 |
| 18 | 12 | 4.250  | -187.6573360907395340 |
| 18 | 12 | 4.500  | -64.1210868951223176  |
| 18 | 12 | 4.750  | -20.8851311631359806  |
| 18 | 12 | 5.000  | -6.5132326804986178   |
| 18 | 12 | 5.250  | -2.0010535534637484   |
| 18 | 12 | 5.500  | -0.5432884693237554   |
| 18 | 12 | 5.750  | -0.1469260933979513   |
| 18 | 12 | 6.000  | -0.0236954226239021   |
| 18 | 12 | 6.250  | -0.0890492805731355   |



|    |    |        |                     |
|----|----|--------|---------------------|
| 18 | 12 | 6.500  | 0.0053433943199366  |
| 18 | 12 | 6.750  | 0.0211045483843582  |
| 18 | 12 | 7.000  | -0.0141738302645766 |
| 18 | 12 | 7.250  | 0.0324750262001032  |
| 18 | 12 | 7.500  | 0.0236170904455868  |
| 18 | 12 | 7.750  | 0.0255964637019765  |
| 18 | 12 | 8.000  | 0.0213075159509444  |
| 18 | 12 | 8.250  | 0.0065350685774612  |
| 18 | 12 | 8.500  | -0.0017040216969648 |
| 18 | 12 | 8.750  | -0.0026488642072826 |
| 18 | 12 | 9.000  | 0.0057125606574857  |
| 18 | 12 | 9.250  | 0.0079089814378193  |
| 18 | 12 | 9.500  | 0.0073275339454287  |
| 18 | 12 | 9.750  | 0.0071927473676305  |
| 18 | 12 | 10.000 | -0.0023397085436614 |
| 18 | 12 | 10.250 | 0.0031967033943259  |
| 18 | 12 | 10.500 | 0.0076392296560749  |
| 18 | 12 | 10.750 | 0.0166231418256125  |
| 18 | 12 | 11.000 | 0.0222387806929740  |
| 18 | 12 | 11.250 | -0.0308381979652043 |
| 18 | 12 | 11.500 | 0.0100144129397945  |
| 18 | 12 | 11.750 | -0.0005616724352001 |
| 18 | 12 | 12.000 | -0.0006666985694183 |
| 18 | 12 | 12.250 | 0.0030870695273518  |
| 18 | 12 | 12.500 | 0.0032813539429643  |
| 18 | 12 | 12.750 | 0.0021436545430030  |
| 18 | 12 | 13.000 | 0.0015524273807508  |
| 18 | 12 | 13.250 | 0.0026336310260525  |
| 18 | 12 | 13.500 | 0.0044783528177645  |
| 18 | 12 | 13.750 | 0.0057549704186061  |
| 18 | 12 | 14.000 | 0.0052091694553321  |
| 18 | 12 | 14.250 | 0.0021169610240846  |
| 18 | 12 | 14.500 | -0.0023636766444092 |
| 18 | 12 | 14.750 | -0.0066278482908872 |
| 18 | 12 | 15.000 | -0.0090862345948363 |
| 18 | 12 | 15.250 | -0.0086332747288508 |
| 18 | 12 | 15.500 | -0.0060599060720069 |
| 18 | 12 | 15.750 | -0.0026261724870067 |
| 18 | 12 | 16.000 | 0.0004163670895011  |
| 18 | 12 | 16.250 | 0.0020899276570548  |
| 18 | 12 | 16.500 | 0.0024770398950130  |
| 18 | 12 | 16.750 | 0.0019213620414366  |
| 18 | 12 | 17.000 | 0.0007652235071465  |
| 18 | 12 | 17.250 | -0.0006614712155016 |
| 18 | 12 | 17.500 | -0.0020790883474388 |
| 18 | 12 | 17.750 | -0.0032212374855166 |
| 18 | 12 | 18.000 | -0.0038221625030175 |
| 18 | 12 | 18.250 | -0.0037059175050700 |
| 18 | 12 | 18.500 | -0.0030551656501038 |
| 18 | 12 | 18.750 | -0.0021416432453341 |
| 18 | 12 | 19.000 | -0.0012367273511159 |
| 18 | 12 | 19.250 | -0.0005586417282784 |
| 18 | 12 | 19.500 | -0.0001119079503077 |
| 18 | 12 | 19.750 | 0.0001526834936329  |
| 18 | 12 | 20.000 | 0.0002849042337800  |
| 18 | 12 | 20.250 | 0.0003305403869604  |
| 18 | 12 | 20.500 | 0.0003186694547053  |
| 18 | 12 | 20.750 | 0.0002743786849267  |
| 18 | 12 | 21.000 | 0.0002243993256871  |
| 18 | 12 | 21.250 | 0.0001947375494503  |
| 18 | 12 | 21.500 | 0.0002019140648522  |
| 18 | 12 | 21.750 | 0.0002586407656295  |
| 18 | 12 | 22.000 | 0.0003767245618200  |
| 18 | 12 | 22.250 | 0.0005517776778532  |
| 18 | 12 | 22.500 | 0.0007197666611980  |
| 18 | 12 | 22.750 | 0.0008021947954702  |
| 18 | 12 | 23.000 | 0.0007212819392660  |
| 18 | 12 | 23.250 | 0.0004419000381551  |
| 18 | 12 | 23.500 | 0.0000969981909349  |
| 18 | 12 | 23.750 | -0.0001387784643780 |
| 18 | 12 | 24.000 | -0.0000912377452628 |
| 18 | 12 | 24.250 | 0.0003422568151488  |
| 18 | 12 | 24.500 | 0.0009805904307805  |
| 18 | 12 | 24.750 | 0.0015717603545724  |
| 18 | 12 | 25.000 | 0.0018639190602141  |
| 18 | 12 | 25.250 | 0.0016788956027720  |
| 18 | 12 | 25.500 | 0.0011326903511169  |
| 18 | 12 | 25.750 | 0.0004153195367614  |
| 18 | 12 | 26.000 | -0.0002824651127850 |
| 18 | 12 | 26.250 | -0.0007993386960812 |
| 18 | 12 | 26.500 | -0.0010914558710155 |
| 18 | 12 | 26.750 | -0.0011438147886227 |
| 18 | 12 | 27.000 | -0.0009402134563905 |
| 18 | 12 | 27.250 | -0.0004934596106030 |
| 18 | 12 | 27.500 | 0.0000641866720991  |
| 18 | 12 | 27.750 | 0.0005708339478653  |
| 18 | 12 | 28.000 | 0.0008652230750910  |
| 18 | 12 | 28.250 | 0.0008350829754905  |
| 18 | 12 | 28.500 | 0.0005640887294273  |
| 18 | 12 | 28.750 | 0.0001877670429982  |
| 18 | 12 | 29.000 | -0.0001525830786422 |
| 18 | 12 | 29.250 | -0.0003428147800022 |
| 18 | 12 | 29.500 | -0.0004021214252977 |
| 18 | 12 | 29.750 | -0.0003896999104045 |
| 18 | 12 | 30.000 | -0.0003707839369273 |

\*\*\*\*\*

The distances R (in bohr) are converted in Angstrom (Å) such as:  
1 bohr = 0.529177249 Å.

**Table S2:** The  $C_{lm}^{(n)}$  3D- PES's fitted parameters according to Eq (3).

| $l$ | $m$ | $n = 12$    | <b>11</b>   | <b>10</b>   | <b>9</b>    | <b>8</b>    | <b>7</b>   | <b>6</b>   |
|-----|-----|-------------|-------------|-------------|-------------|-------------|------------|------------|
| 0   | 0   | -2.67226E11 | 5.757E11    | -4.96938E11 | 2.17085E11  | -4.98597E10 | 5.69501E9  | -2.56615E8 |
| 1   | 0   | 1.06834E11  | -2.26632E11 | 1.9285E11   | -8.33746E10 | 1.90753E10  | -2.18473E9 | 9.83668E7  |
| 2   | 0   | 1.85693E10  | -4.31203E10 | 4.02389E10  | -1.91978E10 | 4.88919E9   | -6.24772E8 | 3.11451E7  |
| 3   | 0   | -9.38464E10 | 1.95924E11  | -1.63863E11 | 6.96367E10  | -1.56884E10 | 1.77369E9  | -7.89045E7 |
| 3   | 3   | 8.73717E10  | -1.82076E11 | 1.52023E11  | -6.45336E10 | 1.45366E10  | -1.64487E9 | 7.32872E7  |
| 4   | 0   | 4.24644E10  | -8.67746E10 | 7.09642E10  | -2.9543E10  | 6.54901E9   | -7.32251E8 | 3.23488E7  |
| 4   | 3   | -9.71189E10 | 2.00119E11  | -1.65139E11 | 6.93958E10  | -1.55284E10 | 1.75208E9  | -7.80607E7 |
| 5   | 0   | 7.40735E9   | -1.5398E10  | 1.28239E10  | -5.4548E9   | 1.24153E9   | -1.43045E8 | 6.51883E6  |
| 5   | 3   | 3.97815E10  | -8.13571E10 | 6.66302E10  | -2.78403E10 | 6.21625E9   | -7.0257E8  | 3.14522E7  |

## Code to generate the 3D-PES of PH<sub>3</sub> – Ar as given by equation (2)

The main program test calls the routine Vpot\_init (once to read and initialize the data) and the function Vl(r,theta,phi) returns the energy value at this point. The compilation is done as follows:

gfortran -o test.x vpot.f90. It needs the radial coefficients,  $V_{lm}(R)$ , in the format given at the end of this file (and not that in the format of Table S1).

```
Vpot.f90 ( program test + subroutine Vpot_init )
*****
Subroutines of the 3D-PES of PH3-Ar system
*****

module mod_pot
  implicit real(kind=8) (a-h,o-z)
  integer, parameter :: dp = 8
  integer :: nmax,lamax
  real(kind=dp),allocatable, dimension(:) :: ri,hh,vv1
  real(kind=dp),allocatable, dimension(:,:) :: fi,fs
  integer, allocatable, dimension(:) :: l1,m1
  real(kind=dp) :: r
contains
end module mod_pot

program test
  implicit real(kind=8) (a-h,o-z)
  call Vpot_init

  read(*,*)r , theta, phi
  E=Vl(r,theta,phi)
  write(*,*)r,theta,phi,E
end program test

subroutine Vpot_init
  use mod_pot

  implicit real(kind=8) (a-h,o-z)
  real(kind=dp), parameter :: pi=3.141592653589793d0
  ipot=10
  !*****
  !
  ! lecture des Vlambdas
  !
  !*****
  open(unit=ipot,file='Vl.pot',status='OLD')
  read(ipot,*)
  read(ipot,*) lamax,nmax,rmin1,deltar
  write(*,*) lamax,nmax,rmin1,deltar
  allocate(ri(0:nmax),hh(0:nmax))
  allocate(fi(0:nmax,0:lamax),fs(0:nmax,0:lamax))
  allocate(l1(0:lamax),m1(0:lamax))
  allocate(vv1(0:lamax))

  irf=1
  select case (irf)
  case (1)

  ri(0)=rmin1!/0.529177d0
  deltar=deltar!/0.529177d0
  do i=1,nmax
    ri(i)=ri(0)+dfloat(i)*deltar
  enddo
  case (2)
  read(ipot,*) ri
  ! write(output,*) ri
  ! ri=ri/0.529177d0
  end select

  do i=0,nmax-1
    hh(i)=ri(i+1)-ri(i)
  enddo
  do il=0,lamax
    read(ipot,*) l1(il),m1(il)
    ! write(*,*) l1(il),m1(il)
    ! READ(ipot,*) fi(0:nmax,il)
    ! write(*,*) fi(0:nmax,il)
  enddo
  !*****
  !
  ! conversion des Vlambdas (cm-1 -----> ua)
  !
  !*****
  ! fi=fi*(2.d0*mu)/uacmm1
```

```

!*****
!
!   calcul des dÃ©rivÃ©es seconde des Vlambda
!
!*****
do il=0,lamax
  call splinel(ri,fi(:,il),fs(:,il),nmax)
enddo

end subroutine Vpot_init

real*8 function Vl(rl,thetal,phil)
  use mod_pot

  implicit real(kind=8) (a-h,o-z)
  real(kind=dp), parameter :: pi=3.141592653589793d0

  theta=thetal*pi/180.d00
  phi=phil*pi/180.d00
  r=rl
  E=0.d00
call pot
  do il=0,lamax
    som=plm(l1(il),m1(il),dcos(theta))*dcos(dfloat(m1(il))*phi)
    if(m1(il)==0) som=som/2.d0
    E=E+som*vvl(il)
  enddo
  E=E*dsqrt(2.d0/pi)
!write(*,*)r,theta*180.d0/pi,phi*180.d0/pi,E
Vl=E
return
end function Vl

subroutine pot
!implicit real(kind=8) (a-h,o-z)
use mod_pot
implicit real(kind=dp) (a-h,o-z)
real(kind=dp), parameter :: eps=0.0000001d0
real(kind=dp) :: Ai,Bi,Ao,Bo,z
integer :: n
integer :: i,k,il
n=nmax
k=0
if((r>=ri(0)-eps).and.(r<=ri(n)+eps)) then
  do i=0,n-1
    if(r>=ri(i)) k=i
  enddo
else
! print *, 'pot : reervoir x !!!',i,x(i),k
  if(r>=ri(n)+eps) then
!$OMP PARALLEL DO PRIVATE (il, Bo,Ao,z)
    do il=0,lamax
      Bo=dlog(dabs(fi(n-1,il)/fi(n,il)))/dlog(dabs(ri(n)/ri(n-1)))
      Ao=fi(n,il)*ri(n)**Bo
      z=Ao/(r**Bo)
      if(fi(n-1,il)*fi(n,il)<=0.d0.or.fi(n-1,il)/fi(n,il)<=1.0d0.or.Bo>8.0d1.or.Bo<=2.d0) then
        z=0.d0
!write(2,*)r,il,z,Ao,Bo
      endif
      vvl(il)=z
! z=z/100.d0
! z=0.d0
!write(2,*)xp,z,Ao,Bo
    enddo
!$OMP END PARALLEL DO
  else
!$OMP PARALLEL DO PRIVATE (il, Bi,Ai,z)
    do il=0,lamax
      if(fi(0,il)*fi(1,il)>0.d0) then
        Bi=dlog(fi(0,il)/fi(1,il))/(ri(1)-ri(0))
        Ai=fi(0,il)*dexp(Bi*ri(0))
        z=Ai*dexp(-Bi*r)
      else
        z=0.d0
      endif
      vvl(il)=z
! z=f(0)
!write(2,*)z,Ai,Bi
    enddo
!$OMP END PARALLEL DO
  endif
! z=0.d0
  return
! stop
endif
if((r>=ri(0)-eps).and.(r<=ri(n)+eps)) then
!$OMP PARALLEL DO PRIVATE (il,z)
  do il=0,lamax
    z=fs(k,il)*(((ri(k+1)-r)**3)/(6.d0*hh(k)))-((hh(k)/6.d0)*(ri(k+1)-r))
    z=z+fs(k+1,il)*(((r-ri(k))**3)/(6.d0*hh(k)))-((hh(k)/6.d0)*(r-ri(k)))
    z=z+(fi(k,il)/hh(k))*ri(k+1)-r
    z=z+(fi(k+1,il)/hh(k))*(r-ri(k))
    vvl(il)=z
  enddo
!$OMP END PARALLEL DO
endif

```

```

!$OMP END PARALLEL DO
endif
!print *, 'l intervalle est:',k
!print *, 'pi(x)=' ,z
end subroutine pot

subroutine spline1(x,f,fs,n)
  implicit real(kind=8) (a-h,o-z)
  integer, parameter :: dp = 8
  real(kind=dp) , allocatable, dimension(:,:) :: a
  real(kind=dp) , intent(in), dimension(0:n) :: x, f
  real(kind=dp) , intent(out), dimension(0:n) :: fs
  real(kind=dp) , allocatable, dimension(:) :: b, h
  integer , intent(in) :: n
  integer :: i,j,k
  real(kind=dp) :: z, xp
  allocate(a(0:n,1:3))
  allocate(b(0:n))
  allocate(h(0:n))
  a(:,1)=0.d0
  do i=0,n-1
    h(i)=x(i+1)-x(i)
  enddo
  do i=1,n-1
    a(i,2)=2.d0*(h(i)+h(i-1))
  enddo
  a(0,2)=2.d0*h(0)
  a(n,2)=2.d0*h(n-1)
  do i=0,n-1
    a(i+1,1)=h(i)
  enddo
  !a(n,1)=0.d0
  do i=1,n
    a(i-1,3)=h(i-1)
  enddo
  !a(0,3)=0.d0
  do i=1,n-1
    b(i)=6.d0*((f(i+1)-f(i))/h(i)-(f(i)-f(i-1))/h(i-1))
  enddo
  b(0)=6.d0*((f(1)-f(0))/h(0)-((f(i)-f(i-1))/h(i-1)+(f(1)-f(0))/h(0)-(f(2)-f(1))/h(1))))
  b(n)=6.d0*((f(n)-f(n-1))/h(n-1))

  if (f(n-1)*f(n)<=0.d0.or.f(n-1)/f(n)<=1.0d0.or.dabs(f(n))<1.d-2)b(n)=0.d0
! write(9,*)b(0),b(n)
!b(0)=0.d0
!b(n)=0.d0
do i=1,n
  a(i,1)=a(i,1)/a(i-1,2)
  a(i,2)=a(i,2)-a(i,1)*a(i-1,3)
enddo
do i=1,n
  b(i)=b(i)-a(i,1)*b(i-1)
enddo
fs(n)=b(n)/a(n,2)
do i=n-1,0,-1
  fs(i)=(b(i)-a(i,3)*fs(i+1))/a(i,2)
enddo
end subroutine spline1

! COMPUTES NORMALIZED ASSOC. LEGENDRE POLYNOMIALS BY RECURSION.
! THE VALUES RETURNED ARE NORMALIZED FOR INTEGRATION OVER X
! (I.E. INTEGRATION OVER COS THETA BUT NOT PHI).
! NOTE THAT THE NORMALIZATION GIVES
! PLM(L,0,1)=SQRT(L+0.5)
! PLM(L,0,X)=SQRT(L+0.5) P(L,X)
! FOR M.NE.0, THE VALUE RETURNED DIFFERS FROM THE USUAL
! DEFINITION OF THE ASSOCIATED LEGENDRE POLYNOMIAL
! (E.G. EDMONDS PAGES 23-24)
! BY A FACTOR OF (-1)**M*SQRT(L+0.5)*SQRT((L-M)!/(L+M)!)
! THUS THE SPHERICAL HARMONICS ARE
! CLM = PLM * EXP(I*M*PHI) / SQRT(L+0.5)
! YLM = PLM * EXP(I*M*PHI) / SQRT(2*PI)
! THIS ROUTINE ALWAYS RETURNS THE VALUE FOR ABS(MIN) NOTE THAT
! FOR MIN.LT.0 THIS VALUE SHOULD BE MULTIPLIED BY PARITY(MIN)
!
! FUNCTION PM1(LIN,MIN,COSTH)
! This routine appears to be much more stable for large l, m than
! the routine from Nerf/ modified according to R.T Pack
! It was obtained:
! From: Marie-Lise Dubernet <ml@dipp-garching.mpg.de>
! Date: Mon, 19 Jun 1995 12:48:11 +0200 (MET DST)
! Some mods 27-28 June 95 by SG for speed and to accord w/ MOLSCAT
! Bugs fixed 21 Sept 95 (SG)
!*****
double precision FUNCTION PLM(LIN,MINa,COSTH)
  IMPLICIT real*8 (a-h,o-z)
  if (ABS(COSTH).GT.1.0d00)THEN
    WRITE(6,*)'***ILLEGAL ARGEMENT TO PLM X=',COSTH
    STOP
  ENDIF
! SAVE IN LOCAL VARIABLES
  L=LIN
  M=IABS(MINa)
  X=COSTH
!

```

```

IF(M.GT.L) THEN
PLM=0.0d00
return
ENDIF
LMAX=L
IF (M.GT.0) GO TO 5
!
PLM=1.0d0
PM2=0.d0
XL=0.d0
DO 2 L=1,LMAX
XL=XL+1.0d0
PP=(2.d0*XL-1.d0)*X*PLM-(XL-1.d0)*PM2/XL
PM2=PLM
2 PLM=PP
GO TO 9000
!
5 IMAX=2*M
RAT=1.d0
AI=0.d0
DO 6 I=2,IMAX,2
AI=AI+2.d0
6 RAT=RAT*((AI-1)/AI)
! Y=SIN(THETA)
Y=SQRT(1.0d0-X*X)
PLM=SQRT(RAT)*(Y**M)
PM2=0.d0
LOW=M+1
XL=LOW-1
DO 10 L=LOW,LMAX
XL=XL+1.0d0
AL=DBLE((L+1)*(L-1))
AL=1.d0/AL
AL2=DBLE((L+M-1)*(L-M-1))*AL
AL=SQRT(AL)
AL2=SQRT(AL2)
PP=(2.d0*XL-1.D0)*X*PLM*AL-PM2*AL2
10 PM2=PLM
PLM=PP
PLM=PLM*AAPARITY(MINa)
9000 PLM=PLM*SQRT(XL+0.5d0)
!9000 PLM=PLM
RETURN
END
!.....

double precision FUNCTION AAPARITY(I)
IMPLICIT DOUBLE PRECISION (A-H,O-Z)
AAPARITY=1.d0
IF ((I/2)*2.NE.I) AAPARITY=-1.d0
RETURN
END
!.....

```

# The radial coefficients, $V_{l,m}(R)$ , to be used in the potential subroutines

The coefficients are in cm-1 and Each block contains the coefficients corresponding to the distances with a regular increasing order (step 0,25) going from [4 ---30] Bohr.

64: number of couples l,m

105: number of distance values used from 4 to 30 by step of 0.25

```
Vl.pot
 64 105 4.0 0.25
 0 0
 0.2042268061400691E+06 0.1395426015718522E+06 0.9491158266827028E+05 0.639511166232521824E+05 0.42517553305040094E+05 0.2779754784072753E+05
 0.1780724220105904E+05 0.111223333878077E+05 0.6720040059924914E+04 0.3872670055187046E+04 0.2069177060176539E+04 0.9558931964422025E+03
 0.2916169164603278E+03 -0.8581438657953485E+02 -0.283858653699856E+03 -0.3726685181943375E+03 -0.3973094329004502E+03 -0.3861957379013471E+03 -
 0.3568552269427609E+03 -0.3198013250711666E+03 -0.2810869461276070E+03 -0.2440085493074909E+03 -0.2101809084422541E+03 -0.1802132961840821E+03 -
 0.1541628972168836E+03 -0.1318045246516860E+03 -0.1127675161982309E+03 -0.9662762662283738E+02 -0.8296027565053730E+02 -0.7142167613094355E+02 -
 0.6170070664722682E+02 -0.5348193621577303E+02 -0.4650053800914726E+02 -0.4053989013623058E+02 -0.3545509823018800E+02 -0.3111802089184861E+02 -
 0.2740051095021168E+02 -0.2418599387456162E+02 -0.2140416729571431E+02 -0.1899629412254025E+02 -0.1690363647634327E+02 -0.1507246082074817E+02 -
 0.1346904935762096E+02 -0.1206468808313506E+02 -0.1083066325979142E+02 -0.9740495132630972E+01 -0.8776638681198465E+01 -0.7923782429729038E+01 -
 0.7166615151012755E+01 -0.6491058450782203E+01 -0.5887963826652053E+01 -0.5349415057395701E+01 -0.4867495887999149E+01 -0.4434822147579332E+01 -
 0.4046137795791447E+01 -0.3696718832348243E+01 -0.3381841310363783E+01 -0.3097115987464777E+01 -0.2839492321139868E+01 -0.2606254451297165E+01 -
 0.2394686604876030E+01 -0.2202255790323690E+01 -0.2027159925199208E+01 -0.1867779658470327E+01 -0.1722495731985318E+01 -0.1589788944777945E+01 -
 0.1468539961457248E+01 -0.1357729410844579E+01 -0.1256338003758040E+01 -0.1163400360905445E+01 -0.1078166443250110E+01 -0.9999400358474591E+00 -
 0.9280250296095148E+00 -0.8617713560969015E+00 -0.8007128951165995E+00 -0.7444295311612305E+00 -0.6925012435531457E+00 -0.6445295364354928E+00 -
 0.6002016164972079E+00 -0.5592261077488904E+00 -0.5213117147338464E+00 -0.4861799750903723E+00 -0.4536034858115348E+00 -0.4233676590215222E+00 -
 0.3952580358228685E+00 -0.3690778166076948E+00 -0.3447006035893430E+00 -0.3220176720084536E+00 -0.3009205300280023E+00 -0.2812984991682391E+00 -
 0.2630315007314339E+00 -0.2459971543651383E+00 -0.2300732897744850E+00 -0.21516110662097932E+00 -0.2012547415089030E+00 -0.1883717054373213E+00 -
 0.1765299255622218E+00 -0.1656670745824798E+00 -0.1553988318056094E+00 -0.1452604818277258E+00
 -0.134787857961212E+00 -0.1238855624676121E+00 -0.113933360333052E+00 -0.1066794083200693E+00 -0.1038727066638911E+00
 1 0
 -0.7294700951321624E+05 -0.4835715467523027E+05 -0.3255042258334200E+05 -0.2201850108493028E+05 -0.1484064979436783E+05 -0.9911830384712286E+04 -
 0.6538183294367725E+04 -0.4249972814031620E+04 -0.2716439249768306E+04 -0.1702331187962845E+04 -0.1041308536534405E+04 -0.6171060981090284E+03 -
 0.3496261113513395E+03 -0.1844431872587770E+03 -0.8506546827660318E+02 -0.2733798537988313E+02 0.4525762961829705E+01 0.2068984856534855E+02
 0.2760028909231475E+02 -0.2922663779604851E+02 -0.2814078260023550E+02 0.2567145744969983E+02 0.2268491555261531E+02 0.1964890906867261E+02
 0.1680102893294693E+02 0.1424593944816911E+02 0.1202003627551697E+02 0.1012014089582940E+02 0.8526459091953065E+01 0.7178090739440063E+01
 0.6031308549436248E+01 0.5079610265129668E+01 0.4314429483228951E+01 0.3673610712434586E+01 0.3131484405890493E+01 0.2675798542628623E+01
 0.2294297241532390E+01 0.1975259485450904E+01 0.1709092985125693E+01 0.1486736175668675E+01 0.1299126912671180E+01 0.1138205349187478E+01
 0.999196775302077E+00 0.88112200568958730E+00 0.7790568083831398E+00 0.6906129930322410E+00 0.6140018553027943E+00 0.5475691036765219E+00
 0.4896605834974287E+00 0.4387705304998206E+00 0.3939856744490692E+00 0.354540733798980E+00 0.3196703883672818E+00 0.2886781564022498E+00
 0.2611428583525724E+00 0.2367121501146636E+00 0.2150336991771344E+00 0.195778027828892E+00 0.1786491381825301E+00 0.163409988932717E+00
 0.1497945745642689E+00 0.1375624850215597E+00 0.1265462603293717E+00 0.1165967381835790E+00 0.1075647952305490E+00 0.9931762504978869E+01 0.9178749680957025E-
 01 0.8492293991998773E-01 0.7867251999098983E-01 0.7298530885813811E-01 0.6781224445637626E-01 0.6310469937846008E-01 0.588140413665788E-01 0.5489546726971585E-
 01 0.5131950447354079E-01 0.4806051945451217E-01 0.4509288620984454E-01 0.423889822017828E-01 0.3991318226799810E-01 0.3762786253371038E-01 0.3549538983248986E-
 01 0.3348603465319441E-01 0.3160162163709795E-01 0.2985186579121259E-01 0.2824648716497108E-01 0.2678952779911122E-01 0.2546224488883792E-01 0.2424016453375944E-
 01 0.2309879571218448E-01 0.2201684656149230E-01 0.2098587053988017E-01 0.2000558791450874E-01 0.1905565958456343E-01 0.1814968177552864E-01 0.172968189692487E-
 01 0.1651498886892024E-01 0.1582179707207477E-01 0.1522371188856015E-01 0.146835004793936E-01 0.1415311142315063E-01
 0.1358433889346723E-01 0.1295667285419253E-01 0.1236111982121026E-01 0.1191662365515565E-01 0.1174205158766922E-01
 2 0
 -0.1018886363939317E+05 -0.5918057197704497E+04 -0.3499620495552525E+04 -0.2054992098904080E+04 -0.1163016306186968E+04 -0.6104791898923104E+03 -
 0.2764887302013831E+03 -0.8441448591732478E+02 0.1726766087414035E+02 0.6354978159171765E+02 0.7783315795804765E+02 0.7510250859814323E+02
 0.6459702454225152E+02 0.5164202813317627E+02 0.3907186504860940E+02 0.2818812616706367E+02 0.1941243223503241E+02 0.1269918711433365E+02
 0.772098277315939E+01 0.4321776402995127E+01 0.1985198398433141E+01 0.4770650724901486E+01 -0.4436893428055697E+00 -0.9597401687044709E+00 -
 0.1214983635619653E+00 -0.1300723971412637E+01 -0.1283717894325569E+01 -0.1213378590066796E+01 -0.1115561214785146E+01 -0.9930519237823070E+00 -
 0.8787240874197080E+00 -0.7642683962306904E+00 -0.6700086058223444E+00 -0.58645465694419423E+00 -0.5098347210217327E+00 -0.4408631534623932E+00 -
 0.3802547481498255E+00 -0.3283834080253367E+00 -0.2842688268085727E+00 -0.2465933800975009E+00 -0.2140399138658404E+00 -0.185474880323224E+00 -
 0.1604992451452327E+00 -0.1388977539521457E+00 -0.1204552371506695E+00 -0.1049118092449932E+00 -0.9182871255861658E-01 -0.8072244079525438E-01 -0.7110954976158679E-
 01 -0.6257612537165436E-01 -0.5498603212977171E-01 -0.482725427586945E-01 -0.4236893108623141E-01 -0.3720606810935756E-01 -0.32705223281226E-01 -
 0.287848666667159E-01 -0.2536352610003578E-01 -0.2236631705930214E-01 -0.1974186301122127E-01 -0.1744500469052757E-01 -0.1543058927220053E-01 -0.1365719057136416E-01 -
 0.1209887512048576E-01 -0.1073105243074890E-01 -0.9532775172707397E-02 -0.8481098458866909E-02 -0.7555182923292658E-02 -0.6734539852517707E-02 -0.5998698845427253E-
 02 -0.5330128931596789E-02 -0.4722990337455840E-02 -0.4174336830970182E-02 -0.3681212464162753E-02 -0.3240730042171458E-02 -0.28503300219259194E-02 -
 0.2507568528617776E-02 -0.2209943088719274E-02 -0.1952771358905334E-02 -0.1722589634603922E-02 -0.1503765781836280E-02 -0.1280688656652151E-02 -0.1043196075110275E-02 -
 0.8029071455497028E-03 -0.5769077738447953E-03 -0.3823620851152593E-03 -0.23257869978330E-03 -0.155432875042845341E-03 -0.95432875042845341E-03 -0.1364328719100083E-
 04 0.5209029197886239E-05 0.2029053928878644E-04 0.5199091358290553E-04 0.120545764646363E-03 0.2372880966017149E-03 0.3783340160174731E-03 0.5105981460869886E-
 03 0.6022362326986580E-03 0.6289129775345209E-03 0.607110231077240E-03 0.5628403016752423E-03
 0.5220021734683444E-03 0.5042607271185176E-03 0.504928469776144E-03 0.5132582745238437E-03 0.5184421055757123E-03
 3 0
 0.5508414205322621E+05 0.3582265784074317E+05 0.2406511138177288E+05 0.1642794743155611E+05 0.1124343797763916E+05 0.7651006792670889E+04
 0.5154054458836965E+04 0.3429631374409569E+04 0.2251416787142166E+04 0.1456304377091712E+04 0.9266798788495639E+03 0.5786315233204326E+03
 0.3530771356768074E+03 0.2091110079676159E+03 0.1187779379034080E+03 0.6323380529681727E+02 0.2992577722893140E+02 0.1060353765293392E+02 -0.8035241730976583E-
 01 -0.5547497437934477E+01 -0.7949221324440330E+01 -0.8616756259591693E+01 -0.8348593891085478E+01 -0.7625230262250767E+01 -0.6727631445768536E+01 -
 0.5804037255313873E+01 -0.4934806043171430E+01 -0.4161779636093922E+01 -0.3931284027003418E+01 -0.2917157663745193E+01 -0.2423437246814250E+01 -
 0.2005199909589755E+01 -0.167683270291799E+01 -0.140486163773206E+01 -0.1175527327934792E+01 -0.9840370085665409E+00 -0.8255957299229683E+00 -
 0.6954852526889006E+00 -0.5892875152653179E+00 -0.5026584700355338E+00 -0.4312538052921829E+00 -0.3712076069120782E+00 -0.320566779076679E+00 -
 0.277856289757338E+00 -0.2416012769447453E+00 -0.2104776682887900E+00 -0.1837653319480428E+00 -0.1608950148961961E+00 -0.1412974576704609E+00 -
 0.124385713518003E+00 -0.1099247944659179E+00 -0.9739767933623032E+00 -0.8649873637635515E+00 -0.7690866997436803E+01 -0.6846499601249514E+01 -0.6104446141054137E-
 01 -0.545238167155048E-01 -0.4878663530899940E-01 -0.4374375678660920E-01 -0.3931284027003418E-01 -0.3541155380449661E-01 -0.3196364939651970E-01 -
 0.2891719514962333E-01 -0.2622633156040473E-01 -0.2384522779161815E-01 -0.2172906481453105E-01 -0.1983703700275313E-01 -0.1812931682658873E-01 -0.1656606516834203E-01 -
 0.1511478931606414E-01 -0.1377236171439896E-01 -0.1254296899489265E-01 -0.114307647334400E-01 -0.1043750203297411E-01 -0.9755353215277861E-02 -0.8774120055962138E-
 02 -0.8083561175839410E-02 -0.7471498038065370E-02 -0.691820394332707E-02 -0.6402092340135716E-02 -0.5901583505757767E-02 -0.5402943624915228E-02 -
 0.4923790302735138E-02 -0.4489586816243191E-02 -0.4125819515485591E-02 -0.3848886524847199E-02 -0.3638832654174598E-02 -0.3466644833569914E-02 -0.3303332421780937E-02 -
 0.3125437719062648E-02 -0.293197905951122E-02 -0.272554426600112E-02 -0.25122881767067E-02 -0.2296380753205258E-02 -0.2087140755556646E-02 -0.1894601238931219E-
 02 -0.1728795092823420E-02 -0.159683089578251E-02 -0.1493923221583370E-02 -0.1412288582283030E-02
 -0.134413093786761E-02 -0.1283829958500305E-02 -0.1234423289097347E-02 -0.1201075503967586E-02 -0.1188846019490885E-02
 3 3
 -0.5097194728903288E+05 -0.3273151370362779E+05 -0.2181203705767187E+05 -0.1482489435146210E+05 -0.1012548488604699E+05 -0.6884933794938654E+04 -
 0.4637608047969059E+04 -0.3087007873699125E+04 -0.2027870247027931E+04 -0.1313114725495910E+04 -0.8369183656451733E+03 -0.5238433639282883E+03 -
 0.3208170832710259E+03 -0.191090137245862E+03 -0.109557353870878E+03 -0.5929919074828588E+02 -0.2904267589566281E+02 -0.11382997121617506E+02 -
 0.1514804124624484E+01 0.363577664112868E+01 0.600222775462295E+01 0.6784367099416076E+01 0.6703872947555150E+01 0.61869920430242E+01 0.5493950415302959E+01
 0.4758924867028876E+01 0.4056912394234399E+01 0.341858977113654E+01 0.2869956210252517E+01 0.2410534679483716E+01
```



0.2011822931641891E+01 0.1658097954026088E+01 0.1382411334469641E+01 0.1156498251150693E+01 0.9667854213876774E+00 0.8088738391815704E+00 0.6783611587645689E+00 0.5710144196434828E+00 0.4832703079138336E+00 0.4417316264499727E+00 0.3530008615904790E+00 0.3040061318244281E+00 0.2629767596034932E+00 0.2284671005421609E+00 0.1990312748913431E+00 0.1734148414913871E+00 0.1511295241930765E+00 0.1318786170560738E+00 0.1153652938153771E+00 0.1012798234632486E+00 0.8926176581895787E-01 0.7893808562653142E-01 0.6993579292453822E-01 0.619393715428031E-01 0.5486327138123792E-01 0.4867942517490177E-01 0.4335976925802251E-01 0.3885674691494292E-01 0.3504490809167193E-01 0.3177934424231473E-01 0.2891514054356915E-01 0.2632680003167712E-01 0.2396649533271087E-01 0.2180581964479852E-01 0.1981636506050658E-01 0.1797540110497471E-01 0.1628290023834343E-01 0.1474450229749362E-01 0.136584823726798E-01 0.1214820200644703E-01 0.1107532165100978E-01 0.1012658483728112E-01 0.9281371744497933E-02 0.8520963645063863E-02 0.7834262419805576E-02 0.7212056377520403E-02 0.664512353677738E-02 0.6125173395493359E-02 0.5647739373115653E-02 0.5209312413539110E-02 0.4806378671582599E-02 0.4435675326283800E-02 0.4095030944972656E-02 0.3782596613807803E-02 0.3496486044892185E-02 0.3234805483846792E-02 0.2995526900531663E-02 0.2776611829094705E-02 0.2576072943298822E-02 0.2392301093478339E-02 0.2225097596435453E-02 0.2074605811214988E-02 0.1940981396267238E-02 0.1823512511822210E-02 0.1717961606075928E-02 0.1619234876255381E-02 0.1522290166102293E-02 0.1423255911704195E-02 0.1322840272090593E-02 0.1222911097892525E-02 0.1125392567275234E-02 0.1033527175111613E-02 0.9557356140442086E-03 0.9017814644032353E-03 0.8815749500574541E-03 4 0 -0.2197631402519322E+05 -0.1309179995715232E+05 -0.8344150804048229E+04 -0.5571968809482014E+04 -0.3804109641652954E+04 -0.2609270912537038E+04 -0.1780827104789713E+04 -0.120386891817879E+04 -0.8044298157475623E+03 -0.5307486673522143E+03 -0.3454480718885555E+03 -0.2215280065188034E+03 -0.1396852853094647E+03 -0.8633574901501891E+02 -0.5204094777890526E+02 -0.3033765136298016E+02 -0.1684350596779576E+02 -0.8631221173437709E+01 -0.3766049622088303E+01 -0.9872954130877929E+00 0.5189590463828466E+00 0.1262166102952008E+00 0.1566982408381989E+01 0.1614532096973079E+01 0.1529276944619340E+01 0.138066919239897E+01 0.1209823592822254E+01 0.137374534245835E+01 0.8807840651610199E+00 0.7373697746076254E+00 0.6163867364091562E+00 0.5012154312429082E+00 0.4223031401938737E+00 0.3563033356228509E+00 0.2956861578971575E+00 0.2420794765818002E+00 0.1971100725479251E+00 0.1617795476927490E+00 0.1345929661841980E+00 0.1134316226564596E+00 0.9617711269788343E-01 0.8108357264877952E-01 0.6789460805081138E-01 0.5672624141345839E-01 0.4796463587600486E-01 0.4080503794586487E-01 0.3561854658288244E-01 0.3158512346906961E-01 0.281547721580442E-01 0.2489162401305478E-01 0.2181590009077805E-01 0.1906179973355504E-01 0.1676352617995214E-01 0.1499990871613310E-01 0.1362816850685356E-01 0.1245012645199983E-01 0.1126760678027181E-01 0.9936378852528627E-02 0.8527886624129788E-02 0.7167503410036025E-02 0.598630361374306E-02 0.5062839480044656E-02 0.4390964793271089E-02 0.3566605695142222E-02 0.3311329327678857E-02 0.3105978924107522E-02 0.2916074121707579E-02 0.2707163311106292E-02 0.245543811275467E-02 0.2179625714082561E-02 0.1909063965225860E-02 0.1673096929040691E-02 0.1493737344423013E-02 0.1363672913159235E-02 0.1268251593577907E-02 0.1192809887126045E-02 0.1124323152732615E-02 0.1056313047938851E-02 0.9839341571564880E-03 0.9023148870246356E-03 0.808634234918662E-03 0.7083352749364391E-03 0.608938426883265E-03 0.517985338887462E-03 0.4418029307490245E-03 0.3819189680016946E-03 0.3386256288798253E-03 0.3122014589159380E-03 0.3008903991486567E-03 0.2947022740185726E-03 0.2815403768070129E-03 0.2492067569070250E-03 0.196816160810315E-03 0.1201024904078016E-03 0.5699064692739908E-04 0.2088708082381360E-04 0.249289702242579E-04 0.5689760619412820E-04 0.9838770698792146E-04 0.1311926602231145E-03 0.1419419030229303E-03 0.1363195695268139E-03 0.12489838423518212E-03 0.1186090500221067E-03 4 3 0.5136864086313608E+05 0.3110575349523916E+05 0.2002120965874958E+05 0.1340784129639435E+05 0.9134190577277952E+04 0.6233282318150780E+04 0.4225429323051467E+04 0.2834101313241745E+04 0.1877425125160997E+04 0.1227061408169159E+04 0.790570089852189E+03 0.50127946276347E+03 0.3121755375243984E+03 0.190244764543990545E+03 0.1127420331711696E+03 0.6433315645804019E+02 0.3466930823975486E+02 0.169208104865201E+02 0.6250392204095735E+01 0.90447729956404584E+01 0.2070850187608833E+01 0.3429492367816052E+01 0.3878441805212099E+01 0.383824987264187E+01 0.3543376434417501E+01 0.3143623108822449E+01 0.2721529768899845E+01 0.2325679651902465E+01 0.1968918054041193E+01 0.1637285454606822E+01 0.1532061980717572E+01 0.111341432462123E+01 0.9203083359572835E+00 0.7598028177366840E+00 0.6258432552681436E+00 0.51526818674805E+00 0.4246738771546085E+00 0.3511249245315455E+00 0.2918807946009957E+00 0.2443684672290923E+00 0.2060148192547514E+00 0.1745045276421136E+00 0.1485518031702522E+00 0.1271278478916603E+00 0.1092034477928586E+00 0.9387768348913790E-01 0.8076381437273718E-01 0.6960373216035745E-01 0.6013904049261730E-01 0.5211978831147679E-01 0.4533159684596003E-01 0.3956922170620021E-01 0.3462747311054734E-01 0.4978795366234050E-01 0.3925712874529111E-01 0.2657492732412737E-01 0.2331480408512009E-01 0.2048170119605786E-01 0.1801926055626688E-01 0.1589712591414201E-01 0.1409145725378272E-01 0.1257842432153566E-01 0.1132698841859664E-01 0.10227735578291760E-01 0.93262554128694663E-02 0.8515611210467580E-02 0.7685014128321880E-02 0.6881071177569824E-02 0.612957811155151E-02 0.5456362631534562E-02 0.4880231462094681E-02 0.4391818524039224E-02 0.3974700223312060E-02 0.3612501055762100E-02 0.3290434509537437E-02 0.2999879401516354E-02 0.2733737564715033E-02 0.2484867825398994E-02 0.224859689188102E-02 0.2030122894137353E-02 0.1837141684903499E-02 0.1677349286002166E-02 0.1554311332918515E-02 0.1455015843196707E-02 0.136231283737695E-02 0.1259066867601358E-02 0.1133760893129703E-02 0.9971879355449146E-03 0.8657515756398483E-03 0.7556912812187047E-03 0.6789963486572462E-03 0.6297670596721084E-03 0.5977440381861231E-03 0.5727408609988140E-03 0.546555642221846E-03 0.5184749601675027E-03 0.489486137380977E-03 0.4604183374858128E-03 0.4317526304174751E-03 0.4028252381645879E-03 0.3725836859414031E-03 0.3397266993141639E-03 0.304097039069094E-03 0.2708391949546770E-03 0.2464095132109821E-03 0.2369458888411109E-03 5 0 -0.3862906373113830E+04 -0.2048951036017482E+04 -0.1239934293813222E+04 -0.798156929367553E+03 -0.5298182342468718E+03 -0.3542666345309283E+03 -0.235452438558642E+03 -0.1545167133820364E+03 -0.9976424320142307E+02 -0.63212299250308457E+02 -0.3925712874529111E+02 -0.2380702175216660E+02 -0.1405119241614495E+02 -0.8022037608737060E+01 -0.4379439171714206E+01 -0.2235013353154351E+01 -0.1013584482958188E+01 -0.3491881336131994E+00 -0.107824668562410E-01 0.1414242639752889E+00 0.1941227563818277E+00 0.1962163126166351E+00 0.1799685969334638E+00 0.1504210462892578E+00 0.1230116206313052E+00 0.995353143696394E+01 0.790000063182328E+01 0.6669446779617799E+01 0.4978795366234050E+01 0.3770506992132815E+01 0.3362279529008651E-01 0.3247814470488317E-01 0.207764298334405E-01 0.1184422750242058E-01 0.8738779231671329E-02 0.8000993470702045E-02 0.8572402587468244E-02 0.824927212374412E-02 0.7048142199459234E-02 0.5440877964369418E-02 0.3899371765117208E-02 0.279523536345610E-02 0.2099675271028923E-02 0.168365260430721E-02 0.1418104869244533E-02 0.1195220516220052E-02 0.9926348630289058E-03 0.8094173106985793E-03 0.6446032191494718E-03 0.4982919931533965E-03 0.3751660691891379E-03 0.2810789068897072E-03 0.2218948313986593E-03 0.200444119111775E-03 0.2044560562918993E-03 0.2206978302549110E-03 0.2343485102139378E-03 0.2343718310058162E-03 0.2232715625200501E-03 0.2069274940390054E-03 0.1912017209504419E-03 0.1800862253106585E-03 0.171069171555692E-03 0.1560624620279103E-03 0.1325547709235048E-03 0.9635587800151037E-04 0.5236693896340820E-04 0.751033847725796E-05 0.3134363252611267E-04 0.5901018966292389E-04 0.768477119908870E-04 0.8768670892666158E-04 0.95114476978485050E-04 0.1005245956519164E-04 0.1014107684750484E-04 0.9390204924398675E-04 0.741106450123571E-04 0.4109732561406276E-04 0.5709424093266158E-04 0.1825199007737849E-04 0.1696608939493556E-04 0.1806992742007773E-04 0.7402625025509999E-04 0.1327234965268617E-03 0.1579604277130157E-03 0.1899658702583157E-03 0.178589447210964E-03 0.15007177615316077E-03 0.1126089325526623E-03 0.737788660512248E-04 0.389333153919694E-04 0.128956850576336E-04 0.5222788496271787E-06 0.4933845239996201E-05 0.2215124967785682E-04 0.463436962792215E-04 0.7160408266980594E-04 0.9276127697418858E-04 0.1077438263304666E-03 0.1152323423184305E-03 -0.1138172495301880E-03 -0.1032227508584833E-03 -0.8817303842061691E-04 -0.7470429364908645E-04 -0.6887197683701237E-04 5 3 -0.2016421561960515E+05 -0.1146930446896934E+05 -0.7058012410336010E+04 -0.4610609772829666E+04 -0.3108614493426177E+04 -0.2116432135912953E+04 -0.1436993256470617E+04 -0.9672554394997258E+03 -0.6438632592639128E+03 -0.4234699517066463E+03 -0.2750068124827487E+03 -0.1762757786368829E+03 -0.1113850794263421E+03 -0.6924310093916752E+02 -0.4221848709797130E+02 -0.2512110580281911E+02 -0.1446775307542473E+02 -0.7944931880747886E+01 -0.4034896983242007E+01 -0.1749884885432724E+01 -0.4622045730631741E+00 0.2291253170445398E+00 0.571317278260134E+00 0.7105564166568850E+00 0.7312734928729197E+00 0.6915010320063922E+00 0.623863239427932E+00 0.5445679010519067E+00 0.4510018106376281E+00 0.407360769786155E+00 0.3518893065258952E+00 0.2738567860004723E+00 0.2301471887569625E+00 0.1958578840194211E+00 0.1620056920660936E+00 0.13057925475366E+00 0.1035658528680938E+00 0.8244200818298289E-01 0.6664403786319960E-01 0.5509834931739742E-01 0.4673159984939419E-01 0.4053940244150889E-01 0.3579200366602696E-01 0.3182813101337065E-01 0.2798631625672896E-01 0.2378462077294150E-01 0.1945963689859639E-01 0.1542760695402017E-01 0.1210457620604167E-01 0.9783740565700881E-02 0.8267910901214561E-02 0.7237450084889893E-02 0.6372763292806581E-02 0.5430163002583172E-02 0.4469576959638705E-02 0.3626839549357901E-02 0.3037801897211071E-02 0.2788353764015790E-02 0.2764626050291822E-02 0.2802849616950164E-02 0.2739285230007969E-02 0.2456743021321583E-02 0.20241065076835148E-02 0.1556773181423671E-02 0.1170166446788953E-02 0.9496086826024479E-03 0.8599564573128224E-03 0.8359664915970552E-03 0.8124545691782946E-03 0.7393875815409992E-03 0.6272723102683339E-03 0.5017215847704735E-03 0.3884138494428696E-03 0.3069757069167202E-03 0.2526280459100331E-03 0.2144517729397318E-03 0.181510387614772E-03 0.146225280950586E-03 0.1143135275932859E-03 0.9477580605807626E-04 0.9655793316708109E-04 0.1239413541150444E-04 0.1627312054452526E-04 0.194078704987151E-03 0.190974587967595E-03 0.1649356545612293E-03 0.1036629656816686E-03 0.3354389793154664E-04 0.2717545531350125E-04 0.6411809396898174E-04 0.783542830951236E-04 0.4791651569410684E-04 0.5865059591605678E-04 0.346907998005832E-04 0.8319629864332470E-05 0.1483378653127838E-04 0.2944091887889476E-04 0.3154599038746737E-04 0.2217189139775956E-04 0.5957629177967116E-05 -0.156041874572203E-04 -0.3870541753101816E-04 -0.5983868145622732E-04 -0.75337379200144110E-04 -0.8145086640617543E-04 6 0 0.1201757462722153E+05 0.5871788158565538E+04 0.3096609714733122E+04 0.1783278997039628E+04 0.1101506658540909E+04 0.708652446238024E+03 0.463678550108793E+03 0.3041194147464018E+03 0.1984384743563576E+03 0.1283303088102301E+03 0.8210143818040339E+02 0.5190487685812401E+02 0.3239156292893875E+02 0.1991859789891446E+02 0.1203325899530682E+02 0.7114395705484149E+01 0.4088729702998215E+01 0.226163585308970E+01 0.1183852305982001E+01 0.5676835608605970E+00 0.2246889724228112E+00 0.437158054938765E-01 0.4467463209190825E-01 0.84916709875603261E-01 0.9557270352319944E-01 0.9279290149457252E-01 0.840563345779603E-01 0.6713097530260902E-01 0.6703129050207757E-01 0.5530401537053109E-01 0.4425649713237662E-01 0.4134678673454850E-01 0.3179003895359944E-01 0.2354847244010578E-01 0.1877284490509677E-01 0.1610470353598492E-01 0.14187646710964E-01 0.1195281359061129E-01 0.948766212895924E-02 0.7169630043008635E-02 0.5376291834874536E-02 0.4369177784147693E-02 0.3946197129162998E-02 0.378941046077

-0.3919220819461056E-03 -0.1077906353277869E-03 -0.1354552982581470E-03 -0.2937404209916172E-03 -0.3686232114878951E-03 -0.3731049034255141E-03 -0.3202466629929346E-03 -0.2257102639018627E-03 -0.1154509498652312E-03 -0.1800889091582714E-04 -0.3801745719975158E-04 -0.3305825014451869E-04 -0.1609205597433161E-04 -0.8349208731814328E-04 -0.1431737987253878E-03 -0.1749406414557758E-03 -0.1816224817213358E-03 -0.1717812339424466E-03 -0.1538955391059416E-03 -0.1354177886099539E-03 -0.1199214822469319E-03 -0.1100365632956540E-03 -0.1083858197456350E-03 -0.1163068746312529E-03 -0.13010775252613580E-03 -0.1448424717829591E-03 -0.155554547406912E-03 -0.1586008091259077E-03 -0.1512473478422552E-03 -0.1347656546919415E-03 -0.1082368319655289E-03 -0.7333619062675767E-04 -0.4008150465240057E-04 -0.2059459297629532E-04 -0.2698699231785950E-04 -0.6622464124915461E-04 -0.124915428106503E-03 -0.1836079982411032E-03 -0.2241837336379761E-03 -0.2327022913583103E-03 -0.2158075068316515E-03 -0.1851974689916543E-03 -0.1525358658063906E-03 -0.12679179304502927E-03 -0.1109905820534142E-03 -0.10211550179268998E-03 -0.9954351812540251E-04

6 3

-0.9097917154207429E+04 -0.4288390870859988E+04 -0.2135548735540878E+04 -0.1146056954328376E+04 -0.6593061588923922E+03 -0.3979764711393135E+03 -0.2465716940606782E+03 -0.154363775239480E+03 -0.9671970195515138E+02 -0.6033201464099943E+02 -0.3736610802652645E+02 -0.229266471349533E+02 -0.1391832211970104E+02 -0.834989637332701E+01 -0.4939697739718696E+01 -0.2878930271732305E+01 -0.1648701605546499E+01 -0.9226995412591465E+00 -0.5010627600557305E+00 -0.2590499014702652E+00 -0.1210714386854537E+00 -0.466683546877879E-01 -0.7084908097466647E-02 -0.1881183850836299E-01 -0.2630813652615427E-01 -0.2794974395668637E-01 -0.2583893773771662E-01 -0.309077544588968E-01 -0.1656034964973241E-01 -0.8235143699536596E-02 -0.4865445666605905E-02 -0.2018331726194755E-02 -0.1120275804938772E-01 -0.2174130234261024E-02 -0.4193598805302678E-03 -0.2675228404865129E-02 -0.5681527752152096E-02 -0.6840560636821952E-02 -0.6203058534665254E-02 -0.448197080764313E-02 -0.2389934404764080E-02 -0.5345773167817966E-03 -0.894599440193519E-03 -0.1812309859306391E-02 -0.2133009464234593E-02 -0.183223831468481E-02 -0.1130649927361831E-02 -0.309880741737045E-03 -0.3484933196437360E-03 -0.6362837248373501E-03 -0.6374909636312903E-03 -0.5089880671687100E-03 -0.4076188023385656E-03 -0.44842432673262670E-03 -0.5777212794506855E-03 -0.7008842650571600E-03 -0.7225814678103347E-03 -0.5778910427713252E-03 -0.322784934684831E-03 -0.434366316115174E-04 -0.1740205936881629E-02 -0.264638137723220E-03 -0.194045833309841E-03 -0.1650044160599138E-03 -0.5630752606156151E-04 -0.324106239319698E-04 -0.122721054199447E-03 -0.1771863314649929E-03 -0.2016428265479661E-03 -0.140164331139507E-03 -0.1639253023856587E-03 -0.123938629589860E-03 -0.8661573285627952E-04 -0.6214561159720484E-04 -0.5119376519300504E-04 -0.5202898091398285E-04 -0.6286627841883885E-04 -0.8121855494258958E-04 -0.1017949242579053E-03 -0.118619960825817E-03 -0.1256830836260159E-03 -0.1192877337243120E-03 -0.1052349933311444E-03 -0.9173138748183493E-04 -0.8701694649337449E-04 -0.9632341988253683E-04 -0.1129755494391116E-03 -0.1273818415595505E-03 -0.1300545308566345E-03 -0.1147397241427930E-03 -0.8809297636180640E-04 -0.600573557703973E-04 -0.4078933042874468E-04 -0.3743016665180196E-04 -0.4469738130449645E-04 -0.5425156754601915E-04 -0.5802854541577516E-04 -0.5082766301745969E-04 -0.3740147754595636E-04 -0.2476577593083569E-04 -0.1979212837311247E-04 -0.2692893963672862E-04 -0.4110641591626799E-04 -0.5495719132760850E-04 -0.611923472324371E-04

6 6

0.1252863012663602E+05 -0.5861808509250335E+04 -0.2925462463197156E+04 -0.1594872599471571E+04 -0.9431119445214827E+03 -0.5888961198345851E+03 -0.3780468350356632E+03 -0.2450252653474654E+03 -0.1587290034242496E+03 -0.1022513095965344E+03 -0.6532958405296017E+02 -0.4134219108639058E+02 -0.2588977359240026E+02 -0.1601832546509415E+02 -0.9770434947793772E+01 -0.586151125977479E+01 -0.3444045179003304E+01 -0.19724975075272E+01 -0.109292837172551E+01 -0.5807965167296807E+00 -0.2866840772972295E+00 -0.1250745375033127E+00 -0.4074881497056282E-01 -0.1024983456252396E-01 -0.309693417578618E-01 -0.3962361554112981E-01 -0.4128454617459281E-01 -0.3533459214650048E-01 -0.3728988540958156E-01 -0.2584592482166670E-01 -0.288103429672228E-01 -0.3417223967731520E-01 -0.2039412574254085E-01 -0.964853886292553E-02 -0.6406626098108603E-02 -0.7365077108466789E-02 -0.9222409323539349E-02 -0.9364782176198672E-02 -0.7932939215419488E-02 -0.5756959717185817E-02 -0.3667140671584690E-02 -0.2313665834624334E-02 -0.1626762160546358E-02 -0.1356720945789980E-02 -0.1253851947082829E-02 -0.111638985371325E-02 -0.9342128014007134E-03 -0.745099874222189E-03 -0.5867705801443357E-03 -0.4866694013752342E-03 -0.4315695319522250E-03 -0.3979311855397127E-03 -0.362297324548083E-03 -0.3047707578613945E-03 -0.2198745592368878E-03 -0.1057558208973335E-03 -0.3945168693281209E-04 -0.2107152130200740E-03 -0.375375354771355E-03 -0.4938678336914581E-03 -0.5266450687763380E-03 -0.4495383980515633E-03 -0.2998125099138993E-03 -0.1300805466175614E-03 -0.7107152130200740E-03 -0.7187488314174364E-04 -0.7729440518201919E-04 -0.4909264976997452E-04 -0.1316446550519990E-04 -0.9430329230342149E-05 -0.1692180296937462E-04 -0.1236780979448071E-04 -0.1187295288904155E-05 -0.202869345557672E-04 -0.3978006862068173E-04 -0.3750534541143191E-04 -0.5746804183883597E-04 -0.4664631419885686E-04 -0.2737829219508908E-04 -0.7764947230148866E-05 -0.4119833770979686E-05 -0.2749588502257150E-05 -0.7374344063663940E-05 -0.1926908183855908E-04 -0.260030885790631E-04 -0.2264764299788474E-04 -0.1220684502709762E-04 -0.3410062865902286E-06 -0.1000498856629012E-04 -0.1333430109277944E-04 -0.1330394585318667E-04 -0.1449818564756150E-04 -0.2155398564272423E-04 -0.3716854969202451E-04 -0.562792214053734E-04 -0.718992592560900E-04 -0.7705730809698906E-04 -0.6740210308228169E-04 -0.4859143632639402E-04 -0.2875658493585800E-04 -0.1602667827413189E-04 -0.1606655819597243E-04 -0.245938921244757E-04 -0.3478456365938604E-04 -0.3972620416815495E-04

7 0

-0.6491947064099213E+04 -0.2885020555871942E+04 -0.1352497926054824E+04 -0.6944681540265956E+03 -0.3933484847323444E+03 -0.2399875225554574E+03 -0.1527517962774418E+03 -0.9897665717318735E+02 -0.6436115545508120E+02 -0.4168838677283706E+02 -0.2679122284372362E+02 -0.1705636180719287E+02 -0.1073802690157065E+02 -0.6674929506540423E+01 -0.4088912548935943E+01 -0.246551541728438E+01 -0.1458079904788222E+01 -0.849657099489480E+00 -0.4788327892546109E+00 -0.2654029835553787E+00 -0.1459499438157380E+00 -0.7740922864646904E-01 -0.4087894237020968E-01 -0.1796692716181856E-01 -0.6906059476979115E-02 -0.4791051469566904E-02 -0.297329222435281E-02 -0.6454923275660495E-02 -0.5347154957107109E-02 -0.1074492990623288E-02 -0.7240688870291639E-02 -0.5294866556609209E-02 -0.5476797792747595E-02 -0.5633090209313437E-02 -0.4824676422520406E-02 -0.3526931287254451E-02 -0.2215147974901770E-02 -0.1279838882263593E-02 -0.1771932740133581E-03 -0.6541330081132386E-03 -0.8935498717796441E-03 -0.1423230162863948E-02 -0.2052300530321462E-02 -0.255866322623796E-02 -0.272012237702880E-02 -0.2390368095315451E-02 -0.172675981371946E-02 -0.9625229523685832E-03 -0.3306598149885472E-03 -0.5345914751627876E-05 -0.734400950196578E-04 -0.241244646312079E-04 -0.3493540664391889E-04 -0.1442048631050772E-04 -0.5878717434051428E-04 -0.1287431347507730E-03 -0.1394835731240514E-03 -0.5388489578522977E-04 -0.8973108070791714E-04 -0.2341607411181583E-03 -0.3221981251430811E-03 -0.3125970071589472E-03 -0.227944431290584E-03 -0.1067800042432675E-03 -0.124104559664703E-04 -0.9799008994597307E-04 -0.1449539844576799E-03 -0.15563286553471E-03 -0.1317338817431940E-03 -0.7803606881755275E-04 -0.9172871253463363E-03 -0.57659280186683709E-04 -0.1053016896721548E-03 -0.1214272002291298E-03 -0.1129171637951186E-03 -0.914674260265315E-04 -0.6880786316882010E-04 -0.5413792878881810E-04 -0.9644125995304589E-04 -0.4212227844700028E-04 -0.3761646320683083E-04 -0.31087436040239410E-04 -0.2751872141864198E-04 -0.335969751737896E-04 -0.5604054326555856E-04 -0.16738026555275E-04 -0.1414065821372891E-03 -0.1686669890776149E-03 -0.1587454641125430E-03 -0.9998404797133785E-04 -0.1506843449192050E-04 -0.647263363587765E-04 -0.1081821201132241E-03 -0.9379662785961374E-04 -0.387293960917972E-04 -0.3015211455764530E-04 -0.8588745341958078E-04 -0.1078674034661062E-03 -0.1013096009077007E-03 -0.7793289938783375E-04 -0.4944878640705097E-04 -0.256025067837987E-04 -0.8441967757238044E-05 -0.1910693701228582E-05 -0.5372094075407744E-05

7 3

0.1732995434112024E+05 -0.7871626629680668E+04 -0.3787666135574899E+04 -0.1991980122604089E+04 -0.1145251165760124E+04 -0.7019913902256634E+03 -0.456847261007307E+03 -0.28695907140590579E+03 -0.1850988610046312E+03 -0.1188602765149557E+03 -0.7571379518778957E+02 -0.4776194570084383E+02 -0.2979789219413561E+02 -0.183630280675617E+02 -0.1115242890092496E+02 -0.6664869403506046E+01 -0.3911027398850592E+01 -0.22488880936736E+01 -0.1256840936991834E+01 -0.68104473292303227E+00 -0.3567369254686051E+00 -0.1745764434210374E+00 -0.675300305779735E-01 -0.1242319702017752E-01 -0.1353740860905367E-01 -0.2597115574564857E-01 -0.2997066913641183E-01 -0.221491739852007E-01 -0.2109396254185120E-01 -0.1314882303465392E-01 -0.1895928815802606E-01 -0.2741113908044804E-01 -0.1550135966237035E-01 -0.5849145347189499E-02 -0.3324011594819445E-02 -0.4767945869204607E-02 -0.702626905108481E-02 -0.7592239276881400E-02 -0.6550515015281741E-02 -0.4634118752315542E-02 -0.2575867866658334E-02 -0.9764609179375369E-03 -0.9006555833087834E-03 -0.6810730391541009E-03 -0.8537473702780046E-03 -0.6839720905011549E-03 -0.3226240218366597E-03 -0.6070147574784371E-04 -0.2966096868953494E-03 -0.2626552775548529E-03 -0.2324265403627103E-04 -0.310647255392897E-03 -0.6280897202835577E-03 -0.8354675003190842E-03 -0.9085313187800429E-03 -0.8403637377456547E-03 -0.6240603536192897E-03 -0.2737880784403031E-03 -0.1118741750652254E-03 -0.4132437769850607E-03 -0.5106463175661605E-03 -0.329952685538331E-03 -0.2073143033887387E-04 -0.3877356336697549E-03 -0.6174164658213667133E-03 -0.6004122860658656E-03 -0.4046091566471981E-03 -0.1421782316381385E-03 -0.7468755916120273E-04 -0.1612047248468688E-03 -0.142203205665943E-03 -0.6996053849827352E-04 -0.3251077344074843E-05 -0.3691118542291426E-04 -0.375791398603373E-04 -0.2356269764966555E-04 -0.1315416739096071E-04 -0.2043100815957101E-04 -0.4267875046790249E-04 -0.7294836668250645E-04 -0.1042219519617724E-03 -0.1301118028849438E-03 -0.1469408873335656E-03 -0.1516548804445503E-03 -0.1410788272937929E-03 -0.1138179650385948E-03 -0.7601200251475273E-04 -0.3570877636800343E-04 -0.8948256935165235E-06 -0.219300034645506E-04 -0.31681118878788E-04 -0.2859333019562474E-04 -0.1280167376299239E-04 -0.1470332812720507E-04 -0.4923336781027441E-04 -0.8507296213804292E-04 -0.1163660330997424E-03 -0.173966357714303E-03 -0.1479560530758626E-03 -0.1452715898656817E-03 -0.1288151793030095E-03 -0.9940569132765772E-04 -0.6556367814983556E-04 -0.376996610673221E-04 -0.2612796964114094E-04

7 6

-0.2197402914041391E+05 -0.9800438683867753E+04 -0.460134394276902E+04 -0.2358052533161284E+04 -0.1327662891700907E+04 -0.8029243327889185E+03 -0.5060155532985189E+03 -0.3246724102179501E+03 -0.2091344119869638E+03 -0.134264444343272E+03 -0.8557179029608483E+02 -0.5404818872043603E+02 -0.3378272595418563E+02 -0.2086644489030878E+02 -0.1271005431360688E+02 -0.7624314983539570E+01 -0.4490351445942103E+01 -0.2589920101174218E+01 -0.1458846906828088E+01 -0.7967711513098168E+00 -0.4240399937774364E+00 -0.2143256755486460E+00 -0.9122134085046962E-01 -0.2791339329513987E-01 -0.1747473092888363E-01 -0.1817913804546922E-01 -0.2331040112791327E-01 -0.2601219709088243E-01 -0.1482670162107282E-02 -0.8393925840811667E-02 -0.110734562233130E-01 -0.4098574435686597E-02 -0.1379048482990315E-01 -0.740878273904666E-02 -0.1003303924197866E-01 -0.243971373993400E-02 -0.6837627013742964E-02 -0.102948523388569E-01 -0.1043481857677181E-01 -0.7121567168752591E-02 -0.3158399019247166E-02 -0.2320008857540079E-03 -0.1498230016961477E-02 -0.2254668415702987E-02 -0.2259801094753461E-02 -0.1739953956693768E-02 -0.9366591846664968E-03 -0.9758545445679215E-04 -0.5384628708110571E-03 -0.7855698115584037E-03 -0.7355159402832601E-03 -0.545085485542542E-03 -0.371029412534203E-03 -0.329741380282875E-03 -0.3625092453473645E-03 -0.4264203865117729E-03 -0.3945179009930203E-03 -0.2235398597681291E-03 -0.3289024976899785E-04 -0.2934370720472611E-03 -0.4788323315532418E-03 -0.5233252420086439E-03 -0.458932713677011E-03 -0.331084158648711E-03 -0.1872290412258670E-03 -0.6661768582839206E-03 -0.2456106512974468E-04 -0.8845272990559700E-04 -0.1272751732079424E-03 -0.1438082460399840E-03 -0.1430542809407

8 0  
-0.1037130217828053E+04 -0.4511357889587398E-03 -0.2072495095478844E+03 -0.1038303550511264E+03 -0.5677366756412948E+02 -0.3307432097003539E+02 -  
0.1966911040387681E+02 -0.1224748982690460E+02 -0.752245930701451E+01 -0.4586541075208288E+01 -0.2750159733835545E+01 -0.1618623446520644E+01 -  
0.9289512970976865E+00 -0.5109215947563033E+00 -0.2658773084254875E+00 -0.1284567546451640E+00 -0.5011866004413698E+00 -0.811797801341872E-02 0.1218025004277479E-  
01 0.1814959486819134E-01 0.191965948583925E-01 0.1898633498862168E-01 0.1544201321457805E-01 0.1109350977002777E-01 0.8846362747307879E-02 0.6309835136173447E-  
02 0.4487188467241054E-02 -0.2813774909769862E-02 -0.7641603423058640E-03 -0.2087044932086002E-02 0.6635491298158769E-02 0.1542161068568859E-02  
0.2644485235236971E-05 0.3201680823474711E-03 0.3297828771913203E-03 0.1503669958102805E-03 -0.9735217699047283E-04 -0.309447899398402E-03 -0.4410475108533873E-03  
-0.4609315611492359E-03 -0.3375997916008622E-03 -0.6370316760295758E-04 0.2725339037246144E-03 0.5591204786199455E-03 0.6839843902355369E-03 0.5731627502066905E-03  
0.3056912892791530E-03 -0.1083120119482750E-05 -0.2298606490670485E-03 -0.2962045663360557E-03 -0.2467405967041536E-03 -0.1608114939989358E-03 -0.1177449222919402E-03  
-0.1729445882547309E-03 -0.2860266233754571E-03 -0.3926475835887011E-03 -0.4284586613512720E-03 -0.3512998913093868E-03 -0.207710339246378E-03 -0.6640542017605222E-04  
0.3907067292502342E-05 -0.4351206922603712E-04 -0.1676467107159241E-03 -0.3055483089856315E-03 -0.3942861328337377E-03 -0.3887297489778285E-03  
0.3149382116908184E-03 -0.2167771018322939E-03 -0.1381286990232017E-03 -0.1124060959178663E-03 -0.1310248580790596E-03 -0.1748716784047144E-03 -0.2248010351019597E-03  
-0.2648063128518618E-03 -0.2914229235012333E-03 -0.3043037722899600E-03 -0.3030313116725719E-03 -0.2879915218659129E-03 -0.2629054650779353E-03 -0.2323429153858400E-  
03 -0.2008462832112368E-03 -0.1731500438196254E-03 -0.1549464116735594E-03 -0.1521694734458595E-03 -0.1707067928864714E-03 -0.2120843297413744E-03  
0.2604628511285664E-03 -0.2956652699169782E-03 -0.2974971506702444E-03 -0.2540439080418351E-03 -0.1866174725490936E-03 -0.1248354057445389E-03 -0.9829231403669231E-04  
-0.1267058362683857E-03 -0.1904808456659260E-03 -0.2602428479496800E-03 -0.3066792403490226E-03 -0.3087525298259598E-03 -0.2786763443825818E-03 -0.2370956038396568E-  
03  
-0.2048538793000057E-03 -0.1972996612114569E-03 -0.2073838902304677E-03 -0.2224891915704064E-03 -0.2302406401847243E-03  
8 3  
-0.9297559104974911E+04 -0.4010112720150672E+04 -0.1790745088635170E+04 -0.8649198019995702E+03 -0.4616664100830081E+03 -0.2689816695260512E+03 -  
0.1659711249708202E+03 -0.1054557485946543E+03 -0.6772134817513387E+02 -0.4349812062199010E+02 -0.27837501901793065E+02 -0.1767479584250099E+02 -  
0.113571057530953E+02 -0.6954103795445171E+01 -0.4293673055481840E+01 -0.26214965578733898E+01 -0.1564943416426838E+01 -0.91624915418078812E+00 -  
0.5250636780369111E+00 -0.12927426788215237E+02 -0.1625672210703663E+00 -0.9021724414229118E+01 -0.4786951245346749E+01 -0.203317584473712E+01 -0.8559453231724357E-  
02 -0.1644142250353808E-02 0.1028985008405092E-02 0.3079688733252928E-03 0.6173201287416830E-02 -0.8942860469144054E-02 -0.3086199504240883E-02  
0.97143883065486E-02 0.4047053812854071E-02 -0.1437909241015779E-02 -0.2125131406274418E-02 -0.198486919288086E-03 0.216088916730406E-02 0.3217414180907131E-02  
0.300295796239387E-02 0.2008604389081993E-02 0.6987760857857725E-03 -0.5080339757600159E-03 -0.1450414039725253E-02 -0.2030107466212211E-02 -0.2148812234511700E-02  
-0.1766953505096092E-02 -0.1079979511708451E-02 -0.3421039560452489E-03 0.1924392657233886E-03 0.3389396809948663E-03 0.1905746353897883E-03 -0.9004908916814252E-  
04 -0.3403529543155003E-03 -0.4349892240896854E-03 -0.3973920724662365E-03 -0.2881565995700509E-03 -0.1678501881112087E-03 -0.8581452943780331E-04  
0.4654815406863176E-04 -0.433839722915285E-04 -0.6968359225439555E-04 -0.1166300295911459E-03 -0.1665494422406694E-02 -0.199535796361314E-02 -0.1956719284693428E-03  
-0.1428753951430040E-03 -0.60402316005314372E-04 -0.2454203454670752E-04 0.8493140080330082E-04 0.9985008197509545E-04 0.7331070438374706E-04 0.15584000151041437E-04  
-0.6304684671956586E-04 -0.1502622712083091E-03 -0.2255476941591262E-03 -0.2663273961021183E-03 -0.2499746868980054E-03 -0.1645471724809667E-03 -0.4124530237646840E-  
04 0.7788475139001099E-04 0.1507265574887964E-03 0.1479321053147966E-03 0.9104027273911067E-04 0.159255593394861E-04 -0.436380080269524E-04 -  
0.6107567070668899E-04 -0.438256309966452E-04 -0.7942146688519905E-05 0.306030983782626E-04 0.5815685600327678E-04 0.7032166032520752E-04 0.6506561998742048E-04  
0.4052187307801020E-04 -0.2710641588062415E-05 -0.546838868102748E-04 -0.1032138479567950E-03 -0.1360987171361606E-03 -0.1441747836208196E-03 -0.1312580950112378E-03  
-0.1046174821290359E-03  
-0.7187357532641236E-04 -0.4006747733000668E-04 -0.1323402354318438E-04 0.5388752127007902E-05 0.1239257383294859E-04  
8 6  
0.1777118444273137E+05 0.7645514576854146E+04 0.3397140405422620E+04 0.1629693810652276E+04 0.8633132789494528E+03 0.4992811513596813E+03  
0.3060107119831832E+03 0.1932536461049720E+03 0.1234287682361499E+03 0.7890793257190032E+02 0.5021466506918672E+02 0.3179074220033105E+02  
0.1985576237329400E+02 0.1229742678821327E+02 0.7513900798290058E+01 0.4519655923974959E+01 0.2661867226876105E+01 0.1529569238093529E+01  
0.8534111270428753E+00 0.467469907153514E+00 0.2473893568194541E+00 0.1248622177341332E+00 0.6600889388747078E-01 0.2612031734994957E-01 0.9959841450864815E-  
02 -0.8473502159489499E-04 -0.44494941104358597E-02 -0.3570151989450210E-02 -0.2521540355998297E-01 0.1088098709454499E-01 -0.11525516696943E-01  
0.3788439014672917E-01 -0.5270387960521816E-02 0.1828574966624252E-01 0.1980672975182252E-01 0.94440739839896573E-02 -0.264945328785942E-02 -0.8446454031224349E-02  
-0.8454693542111258E-02 -0.5319632966261700E-02 -0.1689113608041026E-02 0.3371702337506832E-03 0.8562290715312670E-03 0.514861302131649E-03 -0.3932488843139126E-  
04 -0.2918394719921835E-03 -0.262428504291817E-03 -0.1044524465365626E-03 0.2956131122688888E-04 0.2740143865764821E-04 -0.6631098020815074E-04  
0.168306719988667E-03 -0.1954119041800428E-03 -0.9074538877018590E-04 0.9669376077846801E-04 0.2913292620230212E-03 0.417632810556237E-03 0.42267069797889E-03  
0.3436708698603130E-03 0.2403841472335966E-03 0.1726345921101435E-03 0.1825508872134174E-03 0.2411312373064023E-03 0.3016003062262795E-03 0.3173117958763516E-03  
0.2567348320078322E-03 0.1484050808832071E-03 0.3583559375147649E-04 -0.3750847312949495E-04 -0.4083730430953780E-04 0.5799020806163124E-05 0.6964219845578823E-04  
0.1179521345218704E-03 0.1265193505669560E-03 0.1053213079222903E-03 0.7294850418054777E-04 0.4802770384967903E-04 0.439801062820428E-04 0.53315052645760E-04  
0.6331919448271384E-04 0.6135145875808053E-04 0.3990846255580438E-04 0.1146343027062637E-04 -0.6568770427511916E-05 0.3182122993272696E-05 0.5106527925258231E-04  
0.1198109218078919E-03 0.1854185268839875E-03 0.2239838887927448E-03 0.2192951298289753E-03 0.1858514400743805E-03 0.1459634308136424E-03 0.1226349151471307E-03  
0.12985673358882E-03 0.1505584287565948E-03 0.1582856827494344E-03 0.1270382905131789E-03 0.4224227925709451E-04 -0.6573878458187438E-04 -0.1554287917254413E-03  
-0.1852374457972927E-03 -0.1291779592609427E-03 -0.2417716331352959E-04 0.7718514723743103E-04 0.1225861185815205E-03  
9 0  
0.4071787600010531E+04 0.1644200139453654E+04 0.6667756908396030E+03 0.2824818549444573E+03 0.1300413662456604E+03 0.66121718601664295E+02  
0.3668634399748069E+02 0.2100759825543778E+02 0.1315936796082312E+02 0.8135795880091877E+01 0.5052029265963398E+01 0.313309467449039E+01  
0.1930293508909530E+01 0.1185031251146522E+01 0.7212079443812911E+00 0.4355310785465478E+00 0.2593832408918761E+00 0.1503237238069131E+00 0.8423774122420508E-  
01 0.4258281357789755E-01 0.2161802786454278E-01 0.9149816151762552E-02 0.2737760315877080E-02 -0.7309737818329554E-02 -0.232467891313281E-02  
0.2899369884499375E-02 -0.2262477762350668E-02 -0.705411378797155E-02 0.2748417234417336E-02 -0.2516916671802344E-02 0.3170733734507864E-02 -0.1622075699337769E-02  
0.1028671330764938E-03 0.2231566949431173E-02 0.2146247141935217E-02 0.9064832187201458E-03 0.4287092506598100E-03 -0.102899268351552E-02 -0.9769134324199343E-03  
-0.5830306763580752E-03 -0.1576586384131372E-03 0.563835981372186E-04 0.8555089093815506E-04 0.2355682092192949E-04 -0.3579955894983736E-04 -0.2112883502365485E-04  
0.4896224325090385E-04 0.1333839351027632E-03 0.191255252414583E-03 0.1920732410721630E-03 0.1548559973478346E-03 0.7261398466835317E-04  
0.7703095172604786E-05 -0.7762880644222419E-04 -0.1297303445062523E-03 -0.1590989604208689E-03 -0.1607936583223324E-03 -0.13377923901634324E-03 -0.9237496012572702E-04  
-0.5475407703556864E-04 -0.3907410061101829E-04 -0.5687957740376331E-04 -0.932984606567778E-04 -0.1268684590956340E-03 -0.1361261256758556E-03 -0.106758588950923E-  
03 -0.5300519614511644E-04 0.3760780251575350E-05 0.4217443958786899E-04 0.46482350808187107E-04 0.2336577904530145E-04 -0.1486926087016612E-04  
0.559011372739371E-04 -0.8949202223487727E-04 -0.1137684150043294E-03 -0.128938466383846E-03 -0.1351745136812436E-03 -0.132696801919154E-03 -0.122022516928241E-03  
-0.1037524382237713E-03 -0.7848210726477607E-04 -0.4774339250870190E-04 -0.1686436124789017E-04 0.7852253033029268E-05 0.2007965286092085E-04 0.1449532226313079E-  
04 -0.1019016994751505E-04 -0.5425119988357790E-04 -0.1179994416177730E-03 -0.197320502233251E-03 -0.2703673429928855E-03 -0.3108737927102166E-03  
0.292627836324537E-03 -0.20148836707801891E-03 -0.7134690026829849E-04 0.519362701461125E-04 0.1224888590358976E-03 0.1093539358065346E-03 0.4103635403149358E-04  
-0.3903511455520704E-04  
-0.8744883970324206E-04 -0.7391618544978566E-04 -0.2059945575738790E-04 0.3723764281539981E-04 0.6434726188340065E-04  
9 3  
-0.2021833858773392E+04 -0.7836077540354856E+03 -0.3022742776523934E+03 -0.1190574748409902E+03 -0.4932262581766542E+02 -0.2185491824658407E+02 -  
0.1032107153896230E+02 -0.5109865563494154E+01 -0.2590204425313487E+01 -0.1291513244394480E+01 -0.5915408276339047E+00 -0.2330290397132586E+00 -  
0.5108305118846024E-01 0.3234319323390977E-01 0.6019301743804562E-01 0.5930429526172665E-01 0.4976089532500660E-01 0.38740603438974869E-01 0.2796941747648962E-01  
0.38737560121941E-01 0.12651530188842153E-01 0.1150686309821469E-01 0.6810396345858893E-02 0.2944923332191096E-02 0.2632974757693866E-02 0.229260822310659E-03  
-0.1442028884078544E-02 -0.6707983478687063E-02 0.3873708522366487E-02 0.6495397118786744E-02 0.1197425375343425E-03 -0.887673981872751E-03 -0.1929919701931592E-  
03 0.2474758816129116E-03 0.3501845546275903E-03 0.3018027828105910E-03 0.250068060500894E-03 0.2980767131761618E-03 0.386636755501428E-03 0.4182987393032481E-  
03 0.2963475029373278E-03 -0.3500455128065177E-04 -0.4703160331137272E-03 -0.8600583229409174E-03 -0.1056573861757152E-02 -0.9579086992722117E-03  
0.646772803528239E-03 -0.2520340600230663E-03 0.9754841603613279E-04 0.3026940194598643E-03 0.3817040984129207E-03 0.382228471111511E-03 0.3519131633094455E-03  
0.3283999334102498E-03 0.309022422822391E-03 0.280987096977365E-03 0.231466488640967E-03 0.1548411197475851E-03 0.7470268760933303E-04 0.2186660920523286E-04  
0.271535536455479E-04 0.1081425558139531E-03 0.2293874675078557E-03 0.3421545515098149E-03 0.3976549562618114E-03 0.3624397436450520E-03 0.2642780627493567E-03  
0.1481748261935152E-03 0.5642060164316460E-04 0.2182722029001402E-04 0.31804299032613151E-04 0.6251138885892234E-04 0.9009435109512930E-04 0.9631450341973213E-04  
0.8532249316866376E-04 0.6681114885908880E-04 0.5063691984246722E-04 0.4338897078056748E-04 0.4495459743602130E-04 0.62504180939858642E-04 0.615654409811706E-04  
0.7082500162405709E-04 0.789943922330439E-04 0.8573723248455067E-04 0.9067661543638834E-04 0.9344883771134355E-04 0.9395164328226548E-04 0.9223218882346472E-04  
0.8841142422100955E-04 0.8322183428128756E-04 0.8000612325659528E-04 0.8276459825408076E-04 0.9564056250488313E-04 0.120526947205719E-03 0.1494354399567960E-03  
0.1717036212703011E-03 0.176414534849782E-03 0.1563419192081440E-03 0.1200518122457754E-03 0.8018366715288014E-04  
0.494816340042054E-04 0.3731373748610508E-04 0.3905623069211258E-04 0.4642581526653224E-04 0.5082341718355601E-04  
9 6  
-0.3194492898520439E+04 -0.1452245371758812E+04 -0.6726573730000455E+03 -0.3347535244919018E+03 -0.1828127467513482E+03 -0.1080905798768345E+03 -  
0.672197

0.2882779224983800E-01 0.2070199893286828E-02 -0.1895007262900461E-01 -0.201992138215100E-01 -0.1068709773016613E-01 0.5756878142042510E-01 0.6423841037083267E-02 0.7884863897793836E-02 0.4635679915021923E-02 0.1154523380909073E-02 -0.1632108055100723E-02 -0.3408544892667537E-02 -0.4212801404360533E-02 -0.4084088689991619E-02 0.3127210267517833E-02 -0.170727983054880E-02 -0.2539634150547504E-03 0.8012404132643160E-03 0.1147011653363054E-02 0.9634019598969631E-03 0.5531526071586856E-03 0.213964931659909E-03 0.1875296941129187E-03 0.3727419047556205E-03 0.6182279941588823E-03 0.7454459348394636E-03 0.62589293384442595E-03 0.3964949156784296E-03 0.8235215022888570E-04 -0.1833904948672898E-03 -0.3199911633230378E-03 -0.3479848046704370E-03 -0.3132628048151658E-03 -0.2618271255174810E-03 -0.2289021444102611E-03 -0.2059501164696741E-03 -0.1733027000273106E-03 -0.1112292853954503E-03 -0.8985573670636585E-05 0.1082387024839244E-03 0.2063462950634551E-03 0.2514071162310018E-03 0.2229256336684681E-03 0.1531483982761730E-03 0.8746074694682745E-04 0.7128302453893740E-04 0.1334630905550620E-03 0.236093384442595E-03 0.324633745655407E-03 0.3432758807046647E-03 0.2572865117800656E-03 0.1087296045835968E-03 -0.4058484689636660E-04 -0.1289516857624282E-03 -0.1130775244760902E-03 -0.2273023365243019E-04 0.9397197256254632E-04 0.1887354969199813E-03 0.2253710510271884E-03 0.2171086819814170E-03 0.1896141620540495E-03 0.1684404653359084E-03 0.172061880891227E-03 0.1911399167031894E-03 0.2095985318293479E-03 0.2116059874946360E-03 0.1878114147906488E-03 0.1540811788742843E-03 0.1325403497185638E-03 0.1454147246138442E-03 0.2059145406115273E-03 0.2901922202791483E-03 0.3651136611389211E-03 0.3974890407349496E-03 9 0 -0.4525698510111783E+04 -0.1780138845854479E+04 -0.6909987272071153E+03 -0.2728382640245310E+03 -0.1142841667989380E+03 -0.5252847480923734E+02 -0.2672477500868466E+02 -0.1478731310142631E+02 -0.8641843453003602E+01 -0.5203475285176026E+01 -0.3168285791284340E+01 -0.1944982733421458E+01 -0.193147811571809E+01 -0.7296256785051085E+00 -0.4407537469482987E+00 -0.2683082354016675E+00 -0.1601953355958950E+00 -0.9331284314207244E-01 -0.5341077204529835E-01 -0.2858911329826130E-01 -0.1513899463365248E-01 -0.9700827271950763E-02 -0.5105292241323112E-02 -0.3022001193936197E-02 -0.2142806962944777E-02 -0.9687975025473028E-03 -0.4585205066650611E-03 0.4784210981933934E-02 0.3935593671220317E-02 -0.3721469431787749E-02 -0.9769366802158758E-02 0.1123430147301555E-02 -0.1645276489931902E-03 -0.3135481454069250E-02 -0.3211981469004574E-02 -0.1736649104340300E-02 -0.4541096733706035E-04 0.805375251979848E-03 0.8818941737570446E-03 0.5322301545018643E-03 0.1044928439411369E-03 -0.1267013281472003E-03 -0.1775825922012350E-03 -0.1366879126349398E-03 -0.9221249047240872E-04 -0.111588728905551E-03 -0.1766001731702830E-03 -0.2506179958665766E-03 -0.2950558527095894E-03 -0.2797636758850368E-03 -0.2079400303181423E-03 -0.9129899607281458E-03 0.5838326653949226E-04 0.2249127166904690E-03 0.3743237335088901E-03 0.468197488706487E-03 0.4681336770119941E-03 0.5119948386112516E-03 0.1625936834253818E-03 -0.4105800806436131E-04 -0.2000132295930110E-03 -0.2701848525569709E-03 -0.2668408756035259E-03 -0.2200567562081119E-03 -0.1599253528323452E-03 -0.113241613521431E-03 -0.782604056766879E-04 -0.5951643314266205E-04 -0.5393201581057531E-04 -0.603539875660260E-04 -0.775510560401013E-04 -0.1042694191387308E-03 -0.1392498301231479E-03 -0.179927304132106E-03 -0.2184313429810158E-03 -0.245548868368934E-03 -0.2520558460990003E-03 -0.232239459223040E-03 -0.1942681403519169E-03 -0.1498121319022034E-03 -0.110500374091733E-03 -0.8543740477768224E-04 -0.7367426359205554E-04 -0.7174966972126170E-04 -0.761627096947261E-04 0.8381251687999622E-04 -0.9330002021597840E-04 -0.1036598270339648E-03 -0.1139035673881156E-03 -0.1233314662443498E-03 -0.1324014600579858E-03 -0.1418329215663062E-03 -0.1522719779903152E-03 -0.1634570388469800E-03 -0.1716290006340916E-03 -0.1722111342585396E-03 -0.1605748454413361E-03 -0.1346114369218512E-03 -0.1026268096024357E-03 -0.7569458002700474E-04 -0.6507180720375851E-04 -0.7777555672550349E-04 -0.1038745609093012E-03 -0.1293816446715775E-03 -0.140817178844445E-03 10 0 -0.2364514747886738E+04 -0.9307112490108611E+03 -0.3603090236111921E+03 -0.1409666430572670E+03 -0.5804732113892169E+02 -0.2609019034903076E+02 -0.1297621219937287E+02 -0.7044858735806429E+01 -0.4058733017196346E+01 -0.2413995404478896E+01 -0.1458318905082436E+01 -0.8880215786941221E+00 -0.5411144814675453E+00 -0.3288472136078244E+00 -0.1940052419821718E+00 -0.11533262181636203E+00 -0.6734378297515065E-01 -0.37207220334979626E-01 -0.1968459821556934E-01 -0.1025387138557221E-01 -0.4814650928576469E-02 -0.3799955044954118E-02 -0.339163604639412E-02 -0.1288907221040247E-02 -0.9188722148021355E-03 0.4902006815186155E-03 -0.1413898630353572E-04 0.1944823950529084E-02 0.4264043154619479E-02 0.1110120644391088E-02 -0.56121762452990403E-03 -0.5104347956486066E-04 -0.4960259368909092E-03 -0.748003188404959E-03 -0.5102566064865144E-03 -0.454958093523647E-04 0.3836620504564792E-03 0.5792824441885891E-03 0.5888676652150426E-03 0.5196658740818094E-03 0.478139116744431E-03 0.5408270687787819E-03 0.6652075540196645E-03 0.778953728282945E-03 0.8097098015568127E-03 0.7103212442454154E-03 0.5344073149244899E-03 0.3607483770453612E-03 0.2679665043356927E-03 0.3098134625478810E-03 0.4412864854945187E-03 0.5927934930776702E-03 0.6947539313909012E-03 0.6954826942745518E-03 0.6149221186855791E-03 0.4909513706705670E-03 0.361457377952622E-03 0.2590272333753973E-03 0.1949741879162803E-03 0.1752906258153664E-03 0.2059740281327993E-03 0.2863650636791292E-03 0.3891654345105078E-03 0.4804160792837575E-03 0.5261463360707319E-03 0.5032186542570927E-03 0.4318034895813561E-03 0.3428721609578245E-03 0.267335029933810E-03 0.2289533614788369E-03 0.2225591405827317E-03 0.2358581907546259E-03 0.256470568668447E-03 0.2750905138734216E-03 0.2948297728792015E-03 0.3218888705343176E-03 0.3624086193248430E-03 0.4182871852754372E-03 0.4747306400507204E-03 0.5128158541191999E-03 0.5135923200915715E-03 0.4662119334601852E-03 0.3923874926888421E-03 0.3220109153126219E-03 0.2850132951147319E-03 0.3019539944279642E-03 0.3558160891120876E-03 0.4201666738639746E-03 0.468582280415738E-03 0.481434956776166E-03 0.4662496307851136E-03 0.43731295162510878E-03 0.4088858517128438E-03 0.3918899419742827E-03 0.3839453060943791E-03 0.3793345561593463E-03 0.3722921817928861E-03 0.3589845917352438E-03 0.3434954009845018E-03 0.3319218926322413E-03 0.3303598074686723E-03 0.3423648163507192E-03 0.3616031340563219E-03 0.3793774903409017E-03 0.3871761097220625E-03 10 3 0.6500734456261334E+04 0.2567820282618471E+04 0.1002005497376580E+04 0.3984076668626298E+03 0.1680347903427433E+03 0.7752311668118301E+02 0.393732132898453E+02 0.2166450660860570E+02 0.1258213067921434E+02 0.7530662438678121E+01 0.4543476904126592E+01 0.275808051145056E+01 0.165386863547742E+01 0.9774336644175499E+00 0.5625624859596936E+00 0.3210019815349980E+00 0.1805822010404978E+00 0.1014230064827468E+00 0.5778044730311860E-01 0.35035711663367636E-01 0.2348933635205724E-01 0.1531931340180398E-01 0.1529018207767369E-01 0.9942983064091832E-02 0.7436853860203818E-02 0.3780893454577883E-02 0.1221561456935361E-02 -0.3101964434431934E-02 -0.2534002115364489E-02 -0.2763681032185134E-02 -0.4459852119471037E-02 -0.1292069390998157E-02 0.3008006209413022E-03 0.2243692220423518E-03 0.1547327745422128E-03 0.8486309543672549E-04 -0.4001264114492468E-03 -0.6983312206515776E-03 -0.8905161849207654E-03 0.88804163969342281E-03 -0.6036380789475880E-03 0.7286832283751044E-07 0.7508532594239087E-03 0.1424598796494057E-02 0.1796999796964566E-02 0.1716001599419552E-02 0.1292005588041463E-02 0.7248349840288000E-03 0.2003851996835483E-03 -0.1340054632074754E-03 -0.2972853173682959E-03 -0.3497774802051692E-03 -0.3517388482445020E-03 -0.5513314018333982E-03 -0.3479414216548132E-03 -0.3285679616056856E-03 -0.2803726233835454E-03 -0.1979522074759593E-03 -0.1063244626690159E-03 -0.3810010278515929E-04 -0.2586290027925314E-04 -0.9023530059182230E-04 -0.2040767155617069E-03 -0.328285164245157E-03 -0.42728283136945252E-03 -0.4605277804325153E-03 -0.4459710232371196E-03 -0.3965665864535879E-03 -0.3287682404283014E-03 -0.2577791609864241E-03 -0.1940135182782154E-03 -0.146677818894511E-03 -0.1248573772725366E-03 -0.1325663340115330E-03 -0.1537957551561664E-03 -0.1675709563582604E-03 -0.1752842033767511E-03 -0.9744995331657463E-04 -0.2511206831161778E-04 -0.3140863377476249E-04 0.3927709752748630E-04 -0.211916838820278324E-04 -0.1228330709685764E-03 -0.2216395485794017E-03 -0.2764435699359308E-03 -0.2577622064175771E-03 -0.1858546378152013E-03 -0.93928121759281958E-04 -0.1292994263486902E-04 0.3021832273839741E-04 0.395779225521617E-04 0.257644571965136E-04 -0.6322379544437266E-06 -0.2980816022219486E-04 -0.5565290218166656E-04 -0.7319445826262834E-04 -0.7788014481169765E-04 -0.6771274672373611E-04 -0.496934815920468E-04 -0.3294303293917898E-04 -0.2666592432818826E-04 -0.3688536997583265E-04 -0.5664491670292934E-04 -0.757855557932055E-04 -0.8434788634352394E-04 10 6 -0.9034976919325301E+04 -0.349892009697308E+04 -0.1332127596744804E+04 -0.5103845770598309E+03 -0.2040632610473840E+03 -0.8814570601067135E+02 -0.4190701065670964E+02 -0.218504866935269E+02 -0.1221306996282647E+02 -0.7092358273329353E+01 -0.4188592407046940E+01 -0.249920099398838E+01 -0.1470078991414081E+01 -0.8659147319162983E+00 -0.5139410191908524E+00 -0.3208687514642069E+00 -0.2070736425189352E+00 -0.1357285772011210E+00 -0.9698276864062905E-01 -0.6536554207246326E-01 -0.4526784236689707E-01 -0.2614868075902166E-01 -0.1700368427118093E-01 -0.6397920752455377E-02 -0.2354968919497935E-02 0.2236901629853350E-02 0.11281814458711235E-02 0.1588754817024807E-02 -0.1791437659358586E-01 0.1279230857580060E-01 -0.206318662630771E-01 -0.1105591179493004E-01 0.2475583301686513E-03 0.3862965603360635E-02 0.4156798808666373E-02 0.2630037497151960E-02 0.7878564700503077E-03 -0.1658837832732019E-03 -0.2652534698301956E-03 0.142559140562682E-03 0.7073101932641990E-03 0.1135740549310427E-02 0.1370523612212349E-02 0.1415029304401294E-02 0.1274363984648641E-02 0.972006833567439E-03 0.6017517085967761E-03 0.2746708212164687E-03 0.1032189584528886E-03 0.1583226961685558E-03 0.3368255669089493E-03 0.4910095403123371E-03 0.472910994755435E-03 0.1902398890029078E-03 -0.2279129641094002E-03 -0.5972427113590806E-03 -0.7333854848136090E-03 -0.5120743815608675E-03 -0.4948136014604199E-04 0.4781901141405753E-03 0.8950163202018913E-03 0.1068252296092143E-02 0.103707110950971E-02 0.8837392962021129E-03 0.6909454445760965E-03 0.5274978600720015E-03 0.4048048033551688E-03 0.319733335415509E-03 0.2692363534839426E-03 0.2480909320119740E-03 0.2428119005935814E-03 0.2376826449966563E-03 0.2169314883699036E-03 0.170642326272855E-03 0.1127748896366243E-03 0.6323605197385821E-04 0.4239258535683466E-04 0.1862012453764845E-04 0.1011416891948808E-03 0.1315668909577933E-03 0.1245428574148805E-03 0.6384129115620529E-04 -0.1824016002710538E-04 -0.7722364107229374E-04 -0.686375006699649E-04 0.3464895247224514E-04 0.1907683819836747E-03 0.3409695900330051E-03 0.4269186573709269E-03 0.4084332402254918E-03 0.3178146765929341E-03 0.2059000365924948E-03 0.1245148534610996E-03 0.1092016448817901E-03 0.1268565631987184E-03 0.1271989768855571E-03 0.645309446079833E-04 -0.1009520686182340E-03 -0.2994229562936282E-03 -0.4555751207528762E-03 -0.4892510788328738E-03 -0.3510801253708493E-03 -0.1182517629490301E-03 0.1004771099690493E-03 0.1972702519300318E-03 10 9 0.1022881300249686E+05 0.3990433703341288E+04 0.1525767660892668E+04 0.5864530108172839E+03 0.2356937356273470E+03 0.1028368318316532E+03 0.4962767479128544E+02 0.2628142023812546E+02 0.1485641083915739E+02 0.8727420972846371E+01 0.5188925692789041E+01 0.311121652022322E+01 0.1846996814583335E+01 0.1086076740732373E+01 0.6207835823678387E+00 0.3574287629316695E+00 0.2058647513687077E+00 0.1189190776877523E+00 0.6969924780962550E-01 0.4345779370574808E-01 0.290468027240142E-01 0.1874686297949790E-01 0.1611073770083817E-01 0.7093253991472204E-02 0.6484791967032749E-02 0.2761569991173163E-02 -0.101039012172606E-04 0.379520471041573E-02 0.3554497421258712E-02 -0.355131263002057E-02 0.8118198104494767E-02 -0.546017523406856E-02 -0.460982430489281E-03 0.5529259376721275E-02 0.5780591976197000E-02 0.2920311479244479E-02 -0.4467936943802556E-02 -0.224826578959991E-02 -0.2517842829262842E-02 -0.16288087885301E-02 -0.73957944661408E-03 0.2664947371200516E-03 0.105406371947936352E-02 0.1569086513467838E-02 0.17

-0.2206117180452328E-03 -0.187278889903023E-03 -0.153124839962613E-03 -0.1257800843896325E-03 -0.112735091608978E-03 -0.1199794672616792E-03 -0.1480741792054149E-03 -0.1963301413699911E-03 -0.2641458758784212E-03 -0.3469658633467148E-03 -0.4245763534877018E-03 -0.4728354799805396E-03 -0.467646814524273E-03 -0.3950272267664572E-03 -0.2819397636729528E-03 -0.1657982851146937E-03 -0.8445900162027723E-04 -0.6577826546932239E-04 -0.9644899975831792E-04 -0.1528903368895123E-03 -0.2117032145485904E-03 -0.2537475253270523E-03 -0.2777487583947060E-03 -0.2877576647700119E-03 -0.2896270399007580E-03  
11 0  
-0.3042670023935979E+03 -0.1147213512562111E+03 -0.4308284569240982E+02 -0.1677248209612083E+02 -0.7040648792355370E+01 -0.3244086485155748E+01 -0.1616548683529246E+01 -0.8593797981423658E+00 -0.4752290851881327E+00 -0.2713653927758894E+00 -0.1639519834589755E+00 -0.1010251963432225E+00 -0.6693408671069179E-01 -0.4321207831469032E-01 -0.2589867338885021E-01 -0.1566867562482099E-01 -0.9020897267240535E-02 -0.4379612487269646E-02 -0.1836841953828296E-02 -0.1951738252584101E-02 -0.8486512249755440E-02 -0.9926110828817336E-04 -0.1426589209343465E-02 -0.5743029701749391E-03 -0.9388414702458103E-03 -0.3875291017163968E-03 -0.1151040106529139E-03 -0.4173386269334708E-02 -0.2070293083445626E-02 -0.414860488669097E-02 -0.335630079182679E-03 -0.821374745117837E-03 -0.660193524079408E-03 -0.1926318249488128E-02 -0.1879307464719100E-02 -0.1131022018493485E-02 -0.2934384983969088E-03 -0.1532058905574975E-03 -0.2560964848357230E-03 -0.1943355066043179E-03 -0.1471388751465505E-03 -0.2478613769048904E-03 -0.4460289061779575E-03 -0.6451215487435560E-03 -0.7485534903482697E-03 -0.6887475980957795E-03 -0.5143162822160968E-03 -0.30209511764437291E-03 -0.1324038546912042E-03 -0.6052838915060303E-04 -0.6548036098492482E-04 -0.1054921939213067E-03 -0.1387541274498467E-03 -0.1339934674492998E-03 -0.1021072024096567E-03 -0.6456400554242310E-04 -0.4285550942999912E-04 -0.5045363092917284E-04 -0.6869587745933980E-04 -0.7087852577678704E-04 -0.3031941432666223E-04 -0.67930586433433171E-04 -0.1919667568148636E-03 -0.2981802774202289E-03 -0.3429800416588339E-03 -0.2978629235439124E-03 -0.1947692835353366E-03 -0.8076758909195574E-04 -0.2966779542102309E-05 -0.5204749392906697E-05 -0.3484295761201083E-04 -0.8796659366814724E-04 -0.1190202198535576E-03 -0.1032175243957269E-03 -0.5713017117027357E-04 -0.7667609348124211E-05 -0.1827092175983372E-04 -0.2307547962562956E-05 -0.3980716781614300E-04 -0.8376852174237240E-04 -0.1052608001915512E-03 -0.8707702573720712E-04 -0.404620187308283E-04 -0.162533271328507E-04 -0.6478923356125964E-04 -0.8976477843880538E-04 -0.8703329951290249E-04 -0.5536275119328085E-04 -0.6509670124749291E-05 -0.9512737377690506E-04 -0.1882642161389788E-03 -0.2590476821458273E-03 -0.8206138759442628E-03 -0.2365635431815894E-03 -0.1523896570517779E-03 -0.640923155794151E-04 -0.7788827636210055E-05 -0.8711283469341809E-05 -0.4828079392642346E-04 -0.9689905384733803E-04 -0.1249654127768711E-03 -0.118558073873539E-03 -0.7276218248989411E-04 -0.31737476677977E-04 -0.1274679150464332E-04  
11 3  
-0.3885870366626491E+04 -0.1521461575561294E+04 -0.5816671840455723E+03 -0.2202421652526079E+03 -0.8775455643554909E+02 -0.372679391029361E+02 -0.1738095735391752E+02 -0.8885138930145416E+01 -0.4877142574704777E+01 -0.2814966208467382E+01 -0.1647056704846207E+01 -0.9879077192442338E+00 -0.586918587152727E+00 -0.3419775463601091E+00 -0.1907253288543522E+00 -0.1037199393521488E+00 -0.5025899074741891E-01 -0.2228414630556351E-01 -0.9500489271143886E-02 -0.3251985074074981E-02 -0.1792417381860978E-02 -0.161804305777312E-02 -0.1744521439311253E-02 -0.2698744497707295E-02 -0.2758443747817985E-02 -0.1925297275354676E-02 -0.2648359568643677E-02 -0.1396327710892931E-02 -0.7320357096296970E-02 -0.3457983767134062E-02 -0.4538781568898431E-03 -0.2223029868772770E-02 -0.494435753685829E-03 -0.17484710565629729E-02 -0.2402435096566090E-02 -0.1222633982370979E-02 -0.1244053835666240E-03 -0.8843533438002427E-03 -0.1042397806470845E-02 -0.7667368248730332E-02 -0.8249606483391738E-03 -0.4206916827941293E-03 -0.1030069647019135E-02 -0.1468398813364585E-02 -0.1601214892855444E-02 -0.1347922800530287E-02 -0.2229707925186310E-03 -0.2830471505283726E-03 -0.1473446646570487E-03 -0.3059336406871340E-03 -0.2524788284792657E-03 -0.9661028456631193E-04 -0.5203139504456446E-04 -0.1068661444638603E-03 -0.7373474255796021E-04 -0.183598580681551E-04 -0.1404090342443764E-03 -0.2643853473114680E-03 -0.3661403076718794E-03 -0.4224646166807129E-03 -0.4100615890153735E-03 -0.3177265705539366E-03 -0.1828147818934177E-03 -0.5480774975432940E-04 -0.168643383556369E-04 -0.1413832271663176E-03 -0.803243960912793E-03 -0.2399251458755914E-03 -0.2427664119534155E-03 -0.1996539176746617E-03 -0.1391273352827571E-03 -0.8965549135168764E-04 -0.7296051502197576E-04 -0.839306816129157E-04 -0.110744983814182E-03 -0.1415035670122917E-03 -0.1662223613560440E-03 -0.1828585572070469E-03 -0.1913617237525437E-03 -0.19165684086291E-03 -0.1838186705765993E-03 -0.1687033485574057E-03 -0.1473336775538997E-03 -0.1026462885745416E-03 -0.9021011577506073E-04 -0.6044760773158244E-04 -0.3667789116885619E-04 -0.2404212238506532E-04 -0.2593186503408103E-04 -0.3878573577264159E-04 -0.5742777360425296E-04 -0.7689253768077536E-04 -0.9327694587584086E-04 -0.1063806610449048E-03 -0.116051498331409811E-03 -0.125898331409811E-03 -0.1336593194498791E-03 -0.1390286114801512E-03 -0.1405318105620765E-03 -0.1371135578592509E-03 -0.1287970304566118E-03 -0.1184272302922161E-03 -0.1094957177245457E-03 -0.1056701565649361E-03  
11 6  
0.1055176188655631E+05 0.4106437784884170E+04 0.1560897454556633E+04 0.5923921650627950E+03 0.2325977241892259E+03 0.9801827765699011E+02 0.4535530270529676E+02 0.2305235683458528E+02 0.1258868071799196E+02 0.7183766486916454E+01 0.4188387393049454E+01 0.2439592719467922E+01 0.145946825450256E+01 0.8591290154947774E+00 0.4931828564445269E+00 0.3039079203504946E+00 0.1873241587298020E+00 0.1292519827398904E+00 0.7621639878340281E-01 0.5397558155740723E-01 0.371116914041448E-01 0.2664410831000474E-01 0.224000991094423E-01 0.179384178625444E-01 0.1514818572794000E-01 0.1027377490179887E-01 0.5571540152146170E-02 0.3500077691041448E-02 0.1575880482597899E-01 -0.7482880127454766E-02 0.344056993963352E-01 0.77429280777128E-03 0.2689466563845500E-03 0.7240714908274298E-02 0.7440421377393966E-02 0.4034441729903452E-02 0.1971329873300121E-03 -0.1589395381134603E-02 -0.1565998815930253E-02 -0.6479651485384319E-03 0.2528973518037270E-03 0.4417086807734089E-03 0.8733469644162106E-04 -0.4264479546046696E-03 -0.7170659407331401E-03 -0.5127689340619634E-03 0.1652369676544488E-04 0.5905111503981472E-03 0.9273595231297747E-03 0.8293991379487175E-03 0.4447523988584251E-03 0.926917019504287E-05 0.2409251704576683E-03 -0.1406414229406636E-03 0.1920222734128740E-03 0.5682500462646598E-03 0.7991295429430716E-03 0.7470426296369171E-03 0.4799549783428836E-03 0.1172971957813136E-03 -0.2212967767949142E-03 -0.439515593597449E-03 -0.544363131354639E-03 -0.5266799133696867E-03 -0.4370133798774880E-03 -0.287498091824802E-03 -0.1040989419521066E-03 0.8296061262554055E-04 0.2480679646373997E-03 0.3669175220558939E-03 0.4349386098739545E-03 0.452582643402574E-03 0.420385762316950E-03 0.3443387673042432E-03 0.2511561221286304E-03 0.1728074180466382E-03 0.14141514847023E-03 0.1765209111259597E-03 0.2464425735034899E-03 0.3062627759263486E-03 0.3108158299968680E-03 0.2307945230273726E-03 0.1006279038648886E-03 -0.2934926697236947E-04 -0.1091084408560417E-03 -0.1026255874427191E-03 -0.2866876228411878E-04 0.8018119423606812E-04 0.1909167153953360E-03 0.2763418606933946E-03 0.3351545752240225E-03 0.3728234874492318E-03 0.3948703682390814E-03 0.4062311000100794E-03 0.4102835977489870E-03 0.4105847275021175E-03 0.4114094676020471E-03 0.412887180567876E-03 0.423335475777006E-03 0.4299198399479753E-03 0.4337297515849881E-03 0.4338135573979406E-03 0.431372958293668E-03 0.4282100175305207E-03 0.4265869047134862E-03  
11 9  
-0.1138596089022629E+05 -0.4424674915681244E+04 -0.1674265733084533E+04 -0.6297261838053664E+03 -0.2437997371005113E+03 -0.1008907459048829E+03 -0.4583290393188594E+02 -0.229380461510348E+02 -0.1238854324200836E+02 -0.7012261212110616E+01 -0.4051970728300134E+01 -0.238517624004167E+01 -0.1390665380095641E+01 -0.8592801362983000E+00 -0.4562432468354203E+00 -0.2652793805452873E+00 -0.1524423353680913E+00 -0.8984792972385858E-01 -0.5533046906877748E-01 -0.3714799820636389E-01 -0.2415316535584155E-01 -0.2208871127526207E-01 -0.2008076727088715E-01 -0.20448721272430669E-01 -0.1647504103878528E-01 -0.127907253072136E-01 -0.870230007427336E-02 0.330530635396601E-03 0.6894602423884058E-02 0.8760677229159408E-02 -0.3411877092460114E-01 -0.141057280052313E-01 -0.2020368448170662E-01 -0.1897534445206456E-01 -0.1955635670816747E-01 -0.1040450024070488E-01 0.6551134659554814E-04 0.5211219655206129E-02 0.5442604235010667E-02 0.2933616651005763E-02 -0.145581322842170E-03 -0.2060135849210339E-02 -0.2790895696562878E-02 -0.2744686500640642E-02 -0.2325377738891965E-02 -0.1869636971574391E-02 -0.1452450531939070E-02 -0.1083295882501299E-02 -0.7691752622672118E-03 -0.5124237946745082E-03 -0.3092553084393131E-03 -0.1561388163244838E-03 -0.5020290649315751E-04 0.9649567210541152E-05 0.1681743869359070E-04 -0.3733640310287639E-04 -0.1613223448985318E-03 -0.3541595092267143E-03 -0.5775009472691172E-03 -0.7839593551036972E-03 -0.92260376330585E-03 -0.971828376807053E-03 -0.9385014566246036E-03 -0.858349002723637E-03 -0.7631512434662310E-03 -0.6786569947950160E-03 -0.6063588556120087E-03 -0.5415663171077362E-03 -0.4795795906574981E-03 -0.4193907673625803E-03 -0.3750292520710407E-03 -0.3643868305157260E-03 -0.4052178584254787E-03 -0.5042946410610178E-03 -0.6250317228835122E-03 -0.72006976072947E-03 -0.7422652091003312E-03 -0.6618080677936173E-03 -0.5173416315217645E-03 -0.3643726360895038E-03 -0.2582414652345882E-03 -0.2395263573186361E-03 -0.2902543555783984E-03 -0.3777890013099753E-03 -0.4691421780934371E-03 -0.536968685503767E-03 -0.5773967330288569E-03 -0.5925039284408627E-03 -0.5841634884745078E-03 -0.5560173944968374E-03 -0.5199646411375524E-03 -0.4901479158006587E-03 -0.4806808533325923E-03 -0.4985656802646580E-03 -0.5221197461626722E-03 -0.5227288516755859E-03 -0.4717860022786200E-03 -0.3549193763818845E-03 -0.2146278455362240E-03 -0.1082409726038070E-03 -0.9387245828961668E-04 -0.2062240717101266E-03 -0.3862601563321705E-03 -0.5521148255289764E-03 -0.6247162888923512E-03  
12 0  
0.1287999014174131E+04 0.4860535770675015E+03 0.1793258428177915E+03 0.6531306173985286E+02 0.2411441503077458E+02 0.93333601639789094E+01 0.3893840230240130E+01 0.1776818837512337E+01 0.8776551452598937E+00 0.4609345713964785E+00 0.2524657896123301E+00 0.1405382910707544E+00 0.8342633157161750E-01 0.4922305720933373E-01 0.2917054834881938E-01 0.1572101226215850E-01 0.949729658003149E-02 0.4623309575084278E-02 0.1130662181580533E-02 -0.8608423967189083E-03 -0.5496729348095641E-03 -0.7922690250339315E-03 -0.1243758989197374E-02 -0.559252524888451E-03 -0.6796026440856195E-03 0.7601609148899513E-04 -0.1688141513476182E-03 0.1101838794517640E-02 0.3136472272833757E-02 -0.1678701288959417E-02 0.2183075113822319E-02 0.2628721156064273E-02 -0.2057395093402192E-03 -0.1768131957381678E-02 -0.1759976925695178E-02 -0.9256387628031604E-03 -0.103372600978652E-04 0.4026137924533213E-03 0.3833187720772013E-03 0.1664535695955482E-03 -0.1274122580877014E-04 0.2310023324803012E-04 0.219429785923360E-03 0.4637104706753936E-03 0.6433811553655522E-03 0.6743287999410041E-03 0.586375684325553E-03 0.4378270192828673E-03 0.287112772102074E-03 0.1816735374154943E-03 0.1248744222601683E-03 0.10903172599069E-03 0.1264751235560135E-03 0.167848269381220E-03 0.2169832929179716E-03 0.2559931058896403E-03 0.2669826150754671E-03 0.2379909923521106E-03 0.1807545312809966E-03 0.1129254260466284E-03 0.5216836057109209E-04 0.119946019301310E-04 -0.9086719807038790E-05 -0.175558150440837E-04 -0.1989532307922204E-04 -0.2072573698347346E-04 -0.2192497842153085E-04 -0.242548363216141E-04 -0.2845515392797815E-04 -0.344554855364963E-04 -0.3890813775174473E-04 -0.3764172168720104E-04 -0.2644705635838906E-04 -0.3201462399501920E-05 0.2569190873372974E-04 0.5170207270189381E-04 0.6631512716035598E-04 0.6406352898646189E-04 0.516599421321517E-04 0.3844541403379836E-04 0.3434026499205443E-04 0.640805364785737E-04 0.6926813252011027E-04 0.9664655661773686E-04 0.1209728207004386E-03 0.13620778873369227E-03 0.141189124241999E-03 0.1359910495882938E-03 0.1207016687462051E-04 0.8652231373038281E-04 0.6099241072795141E-04 0.45116749048338528E-04 0.3152559175425770E-04 0.3291877796811338E-04 0.4602

02 0.1871976278860460E-02 0.8541312504825239E-03 0.1964337489333917E-02 0.7940310758099145E-03 0.2007710493091938E-02 -0.5074256080586648E-04 -0.3827390412271953E-04 0.7955018507203870E-03 0.5751315651935956E-02 0.18844002093075529E-02 0.273448566320148E-02 -0.1032090442624478E-03 -0.4705537867799037E-02 -0.3827390412271953E-04 0.3824584972269153E-02 0.4054608606890421E-02 0.2294524320324506E-02 0.189170899844156E-03 -0.9502213845271213E-03 -0.1131639014749837E-02 -0.6908560604922901E-03 0.1710849533876057E-04 0.7589476021054313E-03 0.1349129605640696E-02 0.1724270124471278E-02 0.1801146496718697E-02 0.1537462662099890E-02 0.1054563571117127E-02 0.5146478986458253E-03 0.7990527129199138E-04 -0.1280983904913666E-03 -0.1503740491257874E-03 -0.6856064072774263E-04 0.3576880744745031E-04 0.9630591480582515E-04 0.1007510903004571E-03 0.7997599155439209E-04 0.2281022879642132E-04 -0.5259284200503727E-04 -0.1297865726128487E-03 -0.1910137350452814E-03 -0.2185123232026950E-03 -0.2074770889463601E-03 -0.1497349652143632E-03 -0.8111492422129625E-04 -0.153774734718508E-04 0.3367877626363533E-04 0.6354650128318601E-04 0.74477460048221172E-04 0.6786528817447323E-04 0.4470186281116102E-04 0.1309343740179945E-04 -0.1760621802246676E-04 -0.3800519441855905E-04 -0.4103609726564919E-04 -0.2873789402814152E-04 -0.5409659681348286E-05 0.2472967057331370E-04 0.5607886636010360E-04 0.7720622321166139E-04 0.7519524951527141E-04 0.3708619679936451E-04 -0.42387522463901405E-04 -0.1375266151431569E-03 -0.2147972166844942E-03 -0.2404874426550331E-03 -0.1930376912434382E-03 -0.1001102573497983E-03 -0.1716810226922333E-03 0.6213818659672405E-04 0.63317909359873167E-04 0.2100064223154960E-04 -0.3391062993789856E-04 -0.7046242026087217E-04 -0.660385454323365E-04 -0.3232898941374348E-04 0.9946019958942667E-05 0.3934656359636888E-04 0.3990614625345434E-04 0.1986510609996484E-04 -0.6209949429814222E-05 -0.2382947319139514E-04 -0.2267648540435250E-04 -0.8865305453310118E-05 0.7281505668967555E-05 0.1508436500063033E-04 12 6 -0.4105015085760093E+04 -0.1621138747770165E+04 -0.6190423264381443E+03 -0.2331831863128837E+03 -0.8948639533772757E+02 -0.3635647627476283E+02 -0.161129633971245E+02 -0.7869202953787180E+01 -0.4176086977954128E+01 -0.2307487393077054E+01 -0.1322033255600900E+01 -0.7631229014141354E+00 -0.4275977138332436E+00 -0.2343017486380085E+00 -0.1218813575148019E+00 -0.7717345366244465E+00 -0.5196874220191461E-01 -0.3101499819753428E-01 -0.2690638859962036E-01 -0.1568480881048373E-01 -0.142180076854284E-01 -0.6345712760516875E-02 -0.10530664554404E-01 0.3277803296828807E-02 0.3418938842951746E-03 0.5119030288080140E-02 -0.1127640701536592E-02 0.7035362641065745E-02 -0.1662143007327188E-01 0.7310381698311552E-02 -0.2519468152183801E-01 0.7954999460497270E-02 -0.5022004197963170E-03 -0.1283077090196150E-01 -0.1279759291803861E-01 -0.6257046997077520E-02 0.9259158706820259E-03 0.4173996980791461E-02 0.3980389583463584E-02 0.2095239847785368E-02 0.2630679032038508E-03 -0.1791873427909874E-04 0.4798756867989695E-03 0.1546003856643718E-02 0.2325759654537960E-02 0.2305365215700350E-02 0.1689000606901248E-02 0.8602998283415708E-03 0.2042159449672232E-03 0.5580489191414628E-05 0.1419357007341748E-03 0.3880866107349723E-03 0.5184475304124692E-04 0.373223423536846E-03 0.5519112494284384E-04 -0.2672082490722527E-03 -0.4254234711267846E-03 -0.3020996133950571E-03 0.1517072471474146E-04 0.3875893677638964E-03 0.6765597849038296E-03 0.7780315496080104E-03 0.7255705634920673E-03 0.5873637339645910E-03 0.4321362631951320E-03 0.314432264840016E-03 0.230288025230840E-03 0.16103374776800927E-03 0.8825898102879370E-04 0.2358128008727393E-06 -0.8949801753224684E-04 -0.1611917160811854E-02 -0.1295981825018837E-02 -0.1785520339307178E-03 -0.1303861934835587E-03 -0.7661733914879343E-04 -0.415234742056917E-04 -0.4859496623862980E-04 -0.82206564793230E-04 -0.194929139429963E-04 -0.1616384166209378E-03 -0.1744599158683709E-03 -0.1645750460334966E-03 -0.1355758337083623E-03 -0.9117532190935224E-04 -0.3686106368484127E-04 0.1457990910785217E-04 0.4896378172211668E-04 0.5253504586201005E-04 0.177547810723314482E-04 -0.375621610331186E-04 -0.8848361109671868E-04 -0.1085536536401255E-03 -0.8310973024394305E-04 -0.4966260223800839E-04 -0.5874861322387182E-04 -0.1599157911865920E-03 -0.3768477428182683E-03 -0.632885907524579E-03 -0.8262570055018442E-03 -0.8537430020183010E-03 -0.6523317620969419E-03 -0.3265972241425809E-03 -0.2356405149461609E-04 0.1100306675650333E-03 12 9 0.6177131565274147E+04 0.2427003054343398E+04 0.9206501574545975E+03 0.3440455369459016E+03 0.1307426489224003E+03 0.5247786400333780E+02 0.2293142669393023E+02 0.1104709031693875E+02 0.5739170923923098E+01 0.3147975575947243E+01 0.1721491935775248E+01 0.966160902849238E+00 0.5133408463474325E+00 0.2805006375896255E+00 0.1469480318119416E+00 0.8567556306805102E-01 0.5424772435884151E-01 0.3905902427691631E-01 0.3281172130846866E-01 0.2533356962577338E-01 0.1495072261596764E-01 0.2190336425844075E-01 0.2180200346881067E-01 -0.4531185520195713E-04 0.60100583073849153E-02 -0.485843747529787E-02 -0.4899913173980601E-02 0.7213220542647947E-02 0.1787662757600195E-01 -0.10117946023437843E-01 0.1510123556339114E-01 -0.2605761883547963E-01 0.129855000331345E-04 0.2457609148949513E-01 0.2544401121671874E-01 0.1345461109230198E-01 -0.6350034632489343E-03 -0.8256859718249243E-02 -0.943166555294556E-02 -0.6315623432757489E-02 -0.10521589144743161E-02 0.4451741671118267E-02 0.9184698954137926E-02 0.12352055058476236E-01 0.1315068768303262E-01 -0.1113307296747383E-01 0.7296405430713918E-02 0.3000011100549232E-02 -0.4027070122183882E-02 -0.1915244956757264E-02 -0.1933724955186754E-02 -0.1197599115111664E-02 -0.4444862840516893E-03 -0.2402728630166526E-03 0.4627956033935038E-03 -0.8177636611248432E-03 -0.10115868145925202E-02 -0.8331871033464104E-03 -0.3995391385654343E-03 0.9095513659875248E-04 0.4404857533235763E-03 0.4980415848526163E-03 0.2975157112062284E-03 -0.8164764234202276E-04 -0.5607898385235040E-03 -0.1061391543273169E-02 -0.1503023031635525E-02 -0.1804579215424644E-02 -0.1884833184332690E-02 -0.1700155496757405E-02 -0.135539295972425E-02 -0.992170622549026E-03 -0.7519711793956465E-03 -0.7361415117511411E-03 -0.88688267200446854E-03 -0.1106845437999633E-02 -0.129871466414824E-02 -0.1385006582330458E-02 -0.1366699176693954E-02 -0.1264334895857192E-02 -0.1098415821976631E-02 -0.8940282650921865E-03 -0.6944212196992427E-03 -0.5471166758443348E-03 -0.4989895758482452E-03 -0.5774590525995840E-03 0.7341066097992215E-03 -0.902267537811840E-03 -0.10515496073051463E-02 -0.1024524483729645E-02 -0.9495764956901364E-03 -0.828736589243235E-03 -0.7011255037209132E-03 -0.597077343768689E-03 -0.512066647813874E-03 -0.4338009432166470E-03 -0.352704191292448E-03 -0.2701687427965472E-03 -0.2226519954203387E-03 -0.2547600465109555E-03 03 -0.41166558182877E-03 -0.7109546856186699E-03 -0.1062156747630529E-02 -0.1351173240163960E-02 -0.1470694332910938E-02 12 12 0.1283506407705747E+04 0.4740041654368797E+03 0.1711059147157976E+03 0.6024816283791006E+02 0.2109324024144007E+02 0.7528168926105536E+01 0.2831508504390058E+01 0.1143443992794346E+01 0.5063956995415992E+00 0.2477249751214003E+00 0.1238031011143335E+00 0.6832877713443608E-01 0.4067279292404535E-01 0.2422438851725062E-01 0.120847039001517E-01 0.3041613916160202E-02 0.168268035536562E-02 0.7320886023052253E-03 0.3798690794809545E-03 0.6220894826265640E-03 0.174348067071749E-03 -0.9551116267729753E-03 -0.2643139929809024E-02 0.1934978264550580E-03 -0.1048210872344413E-02 -0.3405020347457821E-04 -0.2403609617669389E-03 -0.5778869299444267E-03 0.2260011782510674E-02 -0.2636924873700153E-02 -0.2337111498366795E-02 0.3626453649874684E-02 -0.7467157157670101E-02 -0.327644672805379E-02 -0.33381511965798E-02 0.12432943672826021E-04 0.102690195803939E-02 0.109600659824833E-02 0.7250796419810968E-03 0.3405988285788587E-03 0.2544665288051196E-03 0.4060582447500405E-03 0.6397766253614101E-03 0.8001672299999818E-03 0.7734401689487580E-03 0.611181379884391E-03 0.406049881918260E-03 0.2507716357776912E-03 0.210415930120685E-03 0.2671821468738234E-03 0.3572054421269177E-03 0.4310391076309816E-03 0.4454994684338631E-03 0.3964741924813442E-03 0.2896554519860959E-03 0.1307815942533375E-03 0.0677550399112823E-04 -0.2672727427989145E-03 -0.4223567872450040E-03 -0.4878617603787105E-03 -0.435119627545994380E-03 -0.3027262754599175E-03 -0.1455146618198344E-03 -0.1851766395835619E-04 0.3713940361385615E-03 0.3528472249539338E-04 0.345107966759586E-05 -0.3079911614500830E-04 -0.452675799642491E-04 -0.3930457072826021E-04 -0.1771808209710679E-04 0.1468614713212066E-04 0.522641586714198E-04 0.8639880964175783E-04 0.1077651642043820E-03 0.1071005653472324E-03 0.7946900043914740E-04 0.369885640899862E-04 -0.3967193690126465E-05 -0.270155765063024E-04 -0.202833750095675E-04 0.1008150392949742E-04 0.534165755762297E-04 0.990899136094986E-04 0.1370719186408395E-03 0.157836814882871E-03 0.1601381523932688E-03 0.1314846790023416E-03 0.7154663418447449E-04 -0.373304416871615E-05 -0.7382720406770224E-04 -0.1179580269416978E-03 -0.1209040918516216E-03 -0.9086241501179634E-04 -0.4199940505679109E-04 0.1142825522680233E-04 0.575813977558430E-04 0.9442013133716468E-04 0.1225446643057428E-03 0.1427995298976751E-03 0.1563616411092063E-03 0.1688845780076116E-03 0.1700750613309373E-03 13 0 -0.7126371363678121E+03 -0.2658447418226854E+03 -0.9725427942993299E+02 -0.3474581848967615E+02 -0.123147756425677E+02 -0.4431991226654112E+01 -0.1673679083017284E+01 -0.6745172597409379E+00 -0.2947501329217275E+00 -0.1434060935588413E+00 -0.7349894495245302E-01 -0.3802406931897906E-01 -0.2127207233303352E-01 -0.1518352185039706E-01 -0.8474597609312630E-02 -0.5818207136318865E-02 -0.4548538849524636E-02 -0.3387719662929191E-02 -0.27769463252629E-02 -0.2589164580599851E-02 -0.1439573204046390E-02 -0.1757230144214528E-03 -0.8892393544647492E-03 0.2407966452721844E-03 0.405777677960376E-03 0.1687206461498947E-03 0.3739291552395940E-03 -0.1173837889553095E-02 0.403103597120559E-02 0.8141159610415283E-03 -0.3395720915651129E-03 -0.1060432993095342E-02 0.4433385043330143E-03 0.137705182743507E-02 0.1200194591860788E-02 0.477523206002904E-03 0.2225580554460873E-03 -0.4824564481985417E-03 -0.3786761205544428E-03 -0.164242783356024E-03 0.2415446401951744E-04 -0.5702498985087827E-04 -0.3023890772200473E-03 -0.5734281939802060E-03 -0.7326207180574302E-03 -0.6826418364178138E-03 -0.4875246533753205E-03 -0.2515865618593913E-03 -0.7905378246000861E-04 -0.4408548176170791E-04 -0.100939573287548E-03 -0.1739493925878967E-03 -0.1874984185470209E-03 -0.90387722282878626E-04 0.7097965618934276E-04 0.2258188015652918E-03 0.3033406616757040E-03 0.2538174693024322E-03 0.1118146635158946E-03 -0.6699866020807091E-04 -0.2269214380606632E-03 -0.3231497345268621E-03 -0.3545962579488974E-03 -0.3311034345361461E-03 -0.2625002271732662E-03 -0.1614570136812447E-03 -0.5220115725360541E-04 0.3812369170047076E-04 0.8235635489558071E-04 0.6386902658571381E-04 0.817323854399759E-05 -0.4867318417181251E-04 -0.7064283433640638E-04 -0.3361587012220188E-04 0.3892882058538873E-03 0.116343725988583E-03 0.1491441251464407E-03 0.127104253228899E-03 0.6519517438477729E-04 -0.588409508241751E-05 -0.5541820833662093E-04 -0.6167854112601577E-04 -0.3895667051367077E-04 -0.1056826531083119E-04 0.1601032446330505E-06 -0.2202726560847126E-04 -0.602555107654575E-04 -0.8964682007685869E-04 -0.8540142168454463E-04 -0.3206141126366831E-04 0.4873010063350717E-04 0.1260799025751181E-03 0.1690813903884645E-03 0.1554543460998423E-03 0.975880620755372E-04 0.165479850563130E-04 -0.6661146336380577E-04 -0.1340461596932428E-03 -0.1807921390635975E-03 -0.2051076514701833E-03 -0.2052759278954187E-03 -0.182275260188770E-03 -0.1479054362077951E-03 -0.1166388109726269E-03 -0.1029876348657598E-03 13 3 0.1995124252505408E+04 0.7423868787753418E+03 0.2701154077221665E+03 0.9631434699747122E+02 0.3434189273174024E+02 0.1257568950959665E+02 0.4880624295314274E+01 0.2043669785477334E+01 0.9406612490321749E+00 0.457133422062466E+00 0.2325640228290382E+00 0.1212601103675909E+00 0.6220024231064758E-01 0.3081213495254076E-01 0.1335155831513646E-01 0.4491266195214116E-02 0.2620147857094413E-02 0.2917699173290919E-02 -0.24809843262091E-03 0.3578198248015148E-03 0.5687811753930015E-04 0.1371725721372119E-02 -0.420757032964651E-03 -0.8648744941432696E-03 -0.1679453275747561E-02 -0.4997561157550207E-03 -0.1321475234606143E-02 0.4628547756974702E-02 -0.4777716224753370E-03 -0.130518540415051E-02 0.5855652338985148E-03 0.759671126688935E-02 -0.1283452260314394E-03 -0.5613258228141925E-02 -0.581

0.2994531819765027E-04 0.2864419325863868E-04 0.1545996051787596E-04 0.6573283381050077E-05 0.1891531385224995E-04 0.6285005569006333E-04 0.123240444184855E-03 0.1785238446627744E-03 0.2070106414569316E-03 0.1940478452419467E-03 0.1536292737327609E-03 0.1069624401545498E-03 0.7523688611352726E-04 0.7318093474489236E-04 0.8981587784233564E-04 0.1077103583718113E-03 0.1093497063884191E-03 0.831517334637630E-04 0.4161474444711577E-04 0.3375562648775214E-05 -0.1285324386395782E-04 0.4389334177352418E-05 0.3795410646032189E-04 0.6365766103001599E-04 0.576638264489938E-04 0.6333773681611800E-05 -0.6437221104364148E-04 -0.1186879402053851E-03 -0.1207919755436053E-03 -0.4838145559006257E-04 0.6678212701002726E-04 0.1794893716758261E-03 0.247566509197020E-03 0.2324287273632306E-03 0.1707202330346002E-03 0.1022991382210010E-03 0.6998296123428224E-04

13 6

-0.2258592692876082E+04 -0.8039794490562958E+03 -0.28192917931731102E+03 -0.9669670996094919E+02 -0.3294825035440294E+02 -0.1135906413603175E+01 0.4090920936815110E+01 -0.1538208815388657E+01 -0.6449868522262250E+00 -0.2756665274932857E+00 -0.8337025169916501E-01 0.3799390727428431E-01 0.4166268029878495E-01 0.5763701875136462E-01 0.4806136406621420E-01 0.5199714421820367E-01 0.4135130292896072E-01 0.3547636533074550E-01 0.1840075169178618E-01 0.1187080194817391E-01 0.1015322309291133E-01 0.1499879525361125E-02 0.8027520010331024E-02 0.2804125321425266E-02 0.6577289617618165E-02 0.166037581517245E-02 -0.5820561578594452E-03 0.7035967507008190E-02 -0.1596106068264413E-01 -0.4345186378381105E-02 0.2879724238910170E-01 -0.1501299489848723E-01 -0.2910417451639780E-03 0.1759791685037998E-01 0.1850364379198879E-01 0.1021397122992918E-01 0.5253074595155949E-03 0.4403539386003658E-02 -0.4890874336635638E-02 -0.2896461647795084E-02 -0.3323987243940008E-03 0.1243062826613101E-02 0.1805761317795515E-02 0.1713599706850415E-02 0.1325113068837619E-02 0.9408853879055781E-02 0.6258257056055913E-03 0.3850237005394927E-03 0.2223111994646178E-03 0.1356370674778992E-03 0.1048714250507093E-03 0.1061553723963743E-03 0.1160238952331583E-03 0.113928028365327E-03 0.899229138228515E-04 0.3864114939246408E-04 -0.5361655907742090E-04 -0.1814133181912460E-03 -0.3187345842619229E-03 -0.4301854779934656E-03 -0.4799858990670669E-03 -0.4450422370979677E-03 -0.3539912455898034E-03 -0.2488173871222077E-03 -0.1718965074113691E-03 -0.1521564077974023E-03 -0.1642462462650282E-03 -0.1690970171033777E-03 -0.1280852808974347E-03 -0.183824194275878E-04 -0.124422597305520E-03 0.237888314326717221E-03 0.2776191455893446E-03 0.20696140974010241E-03 0.7001772723636652E-04 -0.6958511869590341E-04 -0.1481222550937466E-03 -0.122398331136972E-03 -0.3259081605566563E-04 0.5981678184015975E-04 0.9303472242573694E-04 0.2440556138942466E-04 -0.1112326262169634E-03 -0.2596660345267666E-03 -0.3669482193904882E-03 -0.3926416079113551E-03 -0.3493523969167632E-03 -0.2631269866242927E-03 -0.16072317634585221E-03 -0.658745220965436E-04 0.1359035772091404E-04 0.7446235146736809E-04 0.1139832357217533E-03 0.1329329809752425E-03 0.145988603547303E-03 0.171739196177254E-03 0.2296218990736154E-03 0.3302448367198837E-03 0.4460844753759012E-03 0.5397596409111603E-03 0.5741127956519569E-03 0.5268286511917360E-03 0.4325931731081264E-03 0.3402657034043866E-03 0.2986337824979493E-03

13 9

0.1436269508404133E+04 0.447372735296244E+03 0.1398365877457727E+03 0.4140306141182782E+02 0.1117143065250139E+02 0.2333136175641243E+01 0.2515562696089546E-02 -0.5083290651523384E+00 -0.4699203670116603E+00 -0.3005124821908112E+00 -0.2081201727078223E+00 -0.1566005394689114E+00 -0.9074882520694416E-01 -0.645823273519400E-01 -0.6288886995649534E-01 -0.6065969258218118E-01 -0.452744277837010E-01 -0.4084242323696152E-01 -0.2906619762572171E-01 -0.199007765417138E-01 -0.160266429462036E-01 -0.1889350381197552E-01 -0.423076052535065E-02 -0.182288115609087E-01 -0.1324311124603694E-01 -0.1175040291438290E-01 -0.1063499611185925E-01 -0.7540255272517227E-02 -0.1439617426609764E-01 -0.2283047527236398E-02 -0.3698590895475307E-01 0.3995951614736515E-01 0.3224074773022778E-04 -0.3955012226263466E-01 -0.4117310208010172E-01 -0.2232053823434986E-01 -0.3137755872569259E-03 0.111581239583598E-01 0.1236095738212672E-01 0.7327712446329127E-02 -0.955853671694513E-04 -0.662467896688005E-02 -0.1132679414873122E-01 -0.138498444523552E-01 -0.1383306852602949E-01 -0.1120070605356820E-01 -0.703898437631529E-02 -0.272463705520882E-02 0.373236038567220E-03 0.126699217205042E-02 0.4555240056041965E-03 -0.1196270559770049E-02 -0.2825791035740474E-02 -0.3740561681189337E-02 -0.3929414143629635E-02 -0.3551484747040656E-02 -0.2765281747287924E-02 -0.1744165937307612E-02 -0.7229443226888545E-03 0.14740565290467166E-04 0.315910927157407E-03 -0.7038703890568931E-04 -0.8545165165129969E-03 -0.1680397972625057E-02 -0.2190887509145591E-02 -0.2130754264647466E-02 -0.1654042438656534E-02 -0.101732548847224E-02 -0.476874241731186E-03 -0.2319505206135296E-03 -0.2519068101744125E-03 -0.444893598566647E-03 -0.734682026612382E-03 -0.1026830429951685E-02 -0.1268144234175390E-02 -0.140803077513000E-02 -0.1396578423539032E-02 -0.1209847038580916E-02 -0.9250822601803536E-03 0.6442921460792572E-03 -0.4690190646338137E-03 -0.4721603711208763E-03 -0.6124529408950445E-03 -0.8200443262295493E-03 -0.1024249848292039E-03 -0.1166852484696325E-02 -0.1241884178343340E-02 -0.1256806588368815E-02 -0.1218952613378656E-02 -0.113958778966231E-02 -0.104809751116755E-02 -0.9788018171232780E-03 -0.966528081626455E-03 -0.1031558425003569E-02 -0.1132604263106941E-02 -0.1213158056182897E-02 -0.1216542871031162E-02 -0.1107846184554456E-02 -0.9380845430985447E-03 -0.7805169479954931E-03 -0.7090899418218599E-03 -0.7714710451329940E-03 -0.9120681048675108E-03 -0.105120623327819E-02 -0.1113764941505945E-02

13 12

-0.3425221293391514E+04 -0.1256728004544966E+04 -0.4517843281334135E+01 -0.1581138678176703E+03 -0.5473546809491199E+02 -0.1914652404043500E+02 -0.6977681310263051E+01 -0.1269516726327561E-01 -0.1146019078856398E+01 -0.5230797967331000E+00 -0.2537390239693949E+00 -0.12556356620940E+00 -0.7041108760058279E-01 -0.3840205699626154E-01 -0.153410389353429E-01 0.6859265775892354E-02 0.1334794379099336E-02 0.1525252629908547E-02 0.2381470548869835E-02 -0.2183976112424268E-02 -0.3315713268865672E-03 0.5027106856945629E-02 -0.483356559004111E-02 0.1761499906415942E-02 0.4414887535278744E-02 0.1749937159849502E-02 -0.8326135711578253E-03 -0.79837992750760E-02 0.1546843647908203E-01 0.5383503482104146E-02 0.183271099292932E-01 -0.9101791103163226E-02 -0.2575629167669291E-03 0.1074658683760221E-01 0.1131158483443695E-01 0.6185114488574284E-02 0.1424239574527864E-03 -0.3046132329848628E-02 -0.358335359431051E-02 -0.2656839073101491E-02 -0.1453289075376726E-02 -0.9104301196732889E-03 -0.957135044293552E-03 -0.1268808710826519E-02 -0.15206137686954E-02 -0.1465300638027883E-02 -0.11633592068701335E-02 -0.75137975562711E-03 -0.3648781921819222E-03 -0.109306869600208E-03 0.2624132520070988E-04 0.81581106698271945E-04 0.9652711312807538E-04 0.1028767935716685E-03 0.100274032278623E-03 0.8009797217874148E-04 0.337522689410405E-04 -0.3990609599192896E-04 -0.112171242791932E-03 -0.1467620987110618E-03 -0.1069958705503735E-03 0.2575665213154499E-04 0.1960666071839853E-03 0.3297084858303323E-03 0.352419239266602E-03 0.2168565995612770E-03 -0.1662058177087279E-02 -0.260859968336006E-03 -0.4287185286197433E-03 -0.4577875926364515E-03 -0.3841114231825406E-03 -0.268385013777805E-03 -0.1714963974526820E-03 -0.139400408041291E-03 -0.135765279570325E-03 -0.1966307619544558E-03 -0.2265899485290827E-03 -0.225179272978347E-03 -0.19971870199587507E-03 -0.1648961961816155E-03 -0.335878181968218E-03 -0.1223495817034223E-03 -0.1235241382418362E-03 -0.1335003677634212E-03 -0.147262617370674E-03 -0.1599755665046285E-03 -0.1676128759704040E-03 -0.1660474925298001E-03 -0.1512764885025870E-03 -0.121883695550612E-03 -0.8553687998358404E-04 -0.519676543274327E-04 -0.3070444419298667E-04 -0.2859577107800371E-04 -0.401084504078717E-04 -0.5610059851964607E-04 -0.6652708034590163E-04 -0.6507911002948076E-04 -0.6136914557519938E-04 -0.684339696107946E-04 -0.975981650027041E-04 -0.1536883677778437E-03 -0.2207753420528646E-03 -0.2777330824980072E-03 -0.3019594911571619E-03

14 0

-0.8110935389512451E+02 -0.2781594703855262E+02 -0.9286904562473865E+01 -0.3071045446608878E+01 -0.1037150073449538E+01 -0.378773180927219E+00 -0.1580893706025108E+00 -0.7594071321125284E-01 -0.4186147177625799E-01 -0.2705364351564299E-01 -0.1513184708936421E-01 -0.580153624579512E-02 -0.8579029447783881E-02 -0.3085868533878156E-02 -0.2267111498390761E-02 -0.5327919992375030E-03 -0.54656985006046E-03 0.6600005125534381E-04 0.5346128180637469E-03 0.1164315327624621E-02 0.4391814666497851E-03 0.1648619018624231E-02 0.1647344915483018E-02 0.6989366038769873E-03 0.2861846198758400E-03 0.4383997326584677E-03 0.4490689561542638E-03 -0.182005880048769E-02 0.4960307556044263E-02 0.1279487348541331E-02 -0.1927557476108177E-02 0.5507124368149263E-03 -0.844560689291369E-04 -0.925283314920477E-03 -0.8789430121939659E-03 -0.3667906493900475E-03 0.1890369538322112E-03 0.4565883087550571E-03 0.4567986148757974E-03 0.2978042288961369E-03 0.8737024548582709E-04 -0.8541883025547925E-04 -0.2062839309844300E-03 -0.2796726581104636E-03 -0.309635998211614E-03 -0.3033580661370161E-03 -0.273913426796341E-03 -0.2377248701470602E-03 -0.210986647189243E-03 -0.2052096290811045E-03 -0.2128449669592247E-03 -0.2215407937839475E-03 -0.2189082057499903E-03 -0.1967488944447648E-03 -0.1636764728129014E-03 -0.1324965230624087E-03 -0.116023952315181E-03 -0.1217141218858575E-03 -0.1361444190537686E-03 -0.140556483437063E-03 -0.1162539946922003E-03 -0.5251767476052716E-04 0.2923149073238984E-04 0.9955774393369028E-04 0.1290322170473257E-03 0.9909751558218050E-04 0.3462469931513057E-04 -0.2865979849842049E-04 -0.5503905771242562E-04 -0.2021889494020768E-04 0.543420132424382E-04 0.1357449861681681E-03 0.1911015786981718E-03 0.1958395361234128E-03 0.158779480733575E-03 0.9709911733941005E-04 0.2801677961751514E-04 -0.3329805259386078E-04 -0.7994089279411698E-04 -0.1070978739924552E-03 -0.109945902128526E-03 -0.8622791437069149E-04 -0.4403629218841659E-04 0.5923062814758295E-05 0.5291486614610041E-04 0.8778104719572855E-04 0.1078233128130948E-03 0.111992031627676E-03 0.9923710624142740E-04 0.7093262073945561E-04 0.3820880451593789E-04 0.1467258767025650E-04 0.140078094197832E-04 0.4331133552476149E-04 0.8316479497393980E-04 0.1075433179093341E-03 0.9049674907547240E-04 0.1733960158451300E-04 -0.8191693112905693E-04 -0.1661378731142443E-03 -0.1941811900599971E-03 -0.1401013455847849E-03 -0.3900170428518257E-04 0.5869269116881570E-04 0.1024829197152650E-03

14 3

-0.1216380347666900E+04 -0.4520618853502874E+03 -0.1647160170982511E+03 -0.5849554345774578E+02 -0.2052618126774615E+02 -0.7247090926085093E+01 -0.2641346297156375E+01 -0.1018237989915953E+01 -0.4187471324741665E+00 -0.1832409034733686E+00 -0.868735320918580E-01 -0.4537986009205142E-01 -0.2380598930285238E-01 -0.1422085513561200E-01 -0.7121771473002525E-02 -0.5882652846632064E-02 -0.6044844958097872E-02 -0.6246860537234222E-02 -0.642409270257548E-02 -0.3438019942161044E-02 -0.2418092329602287E-02 -0.5131084092638988E-02 0.2723508070929559E-02 -0.2937036970347140E-03 0.5973164566067390E-03 0.4253927505259192E-03 -0.4187469041164876E-03 -0.120134804966460E-02 -0.8323142026839814E-02 0.2006114024098611E-02 0.3869935140718921E-02 -0.5223729884888541E-02 0.4936313787631934E-03 0.540615549131191E-02 0.5407580696435745E-02 0.2790721350668006E-02 -0.1504126116658282E-03 -0.1600763775084587E-02 -0.166832257792243E-02 -0.942559649812688E-03 -0.1338342576634281E-04 0.6383403038498501E-03 0.9692135083624528E-03 0.1045185957146887E-02 0.9322291387083700E-03 0.6964375511239757E-03 0.4042891752025456E-03 0.1223818954914440E-03 -0.8269659175887253E-04 -0.1626119489135827E-03 -0.1418981712080856E-03 -0.6327804046650509E-04 0.3054665682088111E-04 0.1027837941050759E-03 0.1404384673888619E-03 0.1364119421387875E-03 0.8358912254307932E-04 -0.1721324285378675E-04 0.103279976448162E-03 -0.2283669562196793E-03 -0.2481704167709114E-03 -0.1810608951159192E-03 -0.6026692410193566E-04 0.6068790363116416E-04 0.1282361438306828E-03 0.1135716268112027E-03 0.2088302970981777E-04 -0.7959401691783335E-04 -0.1506665084518

0.3675777804340089E+04 0.135671418550077E+04 0.4898065794870436E+03 0.1723013044820173E+03 0.5991849944539354E+02 0.2098308781414312E+02 0.7625763164939826E+01 0.2900843894201216E+01 0.1205737185356384E+01 0.5915648882910176E+00 0.2681368832812723E+00 0.1467313250726612E+00 0.7425981219714117E-01 0.2588035796249244E-01 0.39659797948836780E-02 0.1411476974328663E-01 0.1669660773245338E-01 0.5747481703100021E-02 0.8242193868401415E-02 0.3972593377604202E-02 0.2978088251887516E-02 0.8036002545184218E-02 0.8340706152948130E-02 0.8622005567390900E-02 0.377118241178175E-02 0.7154730820184696E-02 0.4518948434064640E-03 0.2188271917660245E-03 0.6986313723858828E-02 0.1996274944922050E-02 0.3598855315175609E-01 0.1877395625895772E-01 0.6863753242631887E-03 0.2331717227085139E-01 0.2379684760247525E-01 0.1248966396473161E-01 0.2412245399463497E-03 0.6258252805543041E-02 0.628515758826275E-02 0.3256097639973143E-02 0.1016648872442794E-03 0.9069934176137995E-03 0.1297628216392344E-03 0.1415669219936744E-02 0.2710811957830650E-02 0.2980427690863596E-02 0.2425708121764236E-02 0.1492388345004314E-02 0.6260440551252300E-03 0.1728722485269674E-03 0.8365761397116644E-04 0.2106143773985547E-03 0.4060185212513279E-03 0.5499111869761708E-03 0.6333922014628547E-03 0.6755063360153468E-03 0.6954919554603423E-03 0.7055448861453539E-03 0.6893874978894932E-03 0.6236623151510967E-03 0.4851777392878287E-03 0.263020017556235E-03 0.5483665602018517E-05 0.2706310569881992E-03 0.4820444715614991E-03 0.6027448564118178E-03 0.6512173347641564E-03 0.6597671972319724E-03 0.6600950833099972E-03 0.6751106422784314E-03 0.6950963052015646E-03 0.7023451824352336E-03 0.6788724460247144E-03 0.6136901932755623E-03 0.5250630144623195E-03 0.4390044492339554E-03 0.3814049210930370E-03 0.3714406810451376E-03 0.4003863355588957E-03 0.4523958424315563E-03 0.5114075064847207E-03 0.5628226803357193E-03 0.5991900347611274E-03 0.6147712778774468E-03 0.603726109809098E-03 0.563086867977704E-03 0.501971757252781E-03 0.4321458152616482E-03 0.3648709498858850E-03 0.3098757028515177E-03 0.2712520740737329E-03 0.2509513955486035E-03 0.2496366511624496E-03 0.2669093076381439E-03 0.3197696089138561E-03 0.48145215660394108E-03 0.5653659896975721E-03 0.7699889793291934E-03 0.971689683698476E-03 0.1100510160490707E-02 0.108569526013775E-02 0.8747186943555505E-03 0.594764131235480E-03 0.3295728589330768E-03 0.2139649048028496E-03 14 9 -0.5338737574117087E+04 0.1923375089602401E+04 0.6837474864390788E+03 0.2366927429282418E+03 0.8079716691073514E+02 0.2758903570072364E+02 0.9699299019174546E+01 0.3559668230429679E+01 0.1453204706847259E+01 0.6149146026729113E+00 0.3090624741232659E+00 0.1458104456985723E+00 0.847495536678225E-01 0.1746961212114684E-01 0.1839707190138995E-01 0.2361762584837379E-01 0.2598204412261040E-01 0.228887115249497E-01 0.2055594736243904E-01 0.1882364099008238E-01 0.8878126398327024E-03 0.1098222498405821E-01 0.410745197129494E-01 0.110632903502296E-01 0.3931182520156434E-02 0.1337023863385611E-01 0.1538414118917097E-01 0.4018946161056247E-03 0.3248321901848428E-02 0.1451605064246575E-01 0.19988323246916348E-01 0.3485340795044366E-01 0.8924827947177638E-03 0.295848622060550E-01 0.3075133301600361E-01 0.1587159757549886E-01 0.1925386447132110E-02 0.1215805035998233E-01 0.1434355339446614E-01 0.104093832944923E-01 0.236942576493761E-02 0.7881955901754084E-02 0.1794757952924050E-01 0.2535430316281770E-01 0.2761208862204404E-01 0.2318001889629866E-01 0.1436100457476486E-01 0.4422013067131060E-02 0.3379973003551990E-02 0.6634961633791767E-02 0.6259470680775732E-02 0.3992705394513688E-02 0.156990418485625E-02 0.3500496707053817E-03 0.1869238148914914E-03 0.5590059137670945E-03 0.9468900224385866E-03 0.9536095877144156E-03 0.6657010619229558E-03 0.2889211834037342E-03 0.2802038608113507E-04 0.3950167781545735E-04 0.2909291221026350E-03 0.7041591580857725E-03 0.1203270291350536E-02 0.1715363797520989E-02 0.2172562313977321E-02 0.2507756821831493E-02 0.2654097372517894E-02 0.2577172954919277E-02 0.2367412285897198E-02 0.214636606940361E-02 0.2035695694701343E-02 0.2122168733481056E-02 0.2351696771355998E-02 0.2635059733085037E-02 0.28833682471619E-02 0.3022990386013327E-02 0.3037391644251351E-02 0.2924140572637350E-02 0.2680766607955493E-02 0.2324705741391615E-02 0.1951321044077123E-02 0.1674804768738194E-02 0.1607744009149322E-02 0.1812104822695908E-02 0.2151182375760725E-02 0.2440327897182814E-02 0.2495305471403548E-02 0.2196359910477036E-02 0.1683502998004463E-02 0.1163145279277039E-02 0.8444603272815539E-03 0.8691401662063796E-03 0.1108089898202813E-02 0.1366499668557561E-02 0.1455992390599366E-02 0.1261838093790631E-02 0.9424255241631288E-03 0.7226942362836890E-03 -0.8286291137498019E-03 -0.1393666010076471E-02 -0.2183938612640576E-02 -0.2880855258707680E-02 -0.3179589380442900E-02 14 12 0.4701884628145104E+04 0.1713431882785837E+04 0.6139399006458952E+03 0.2140135608803575E+03 0.7353053891601667E+02 0.2532095152285638E+02 0.10212396826383792E+01 0.3317772329261061E+01 0.1310762785495854E+01 0.5357340013032399E+00 0.2427476079815847E+00 0.1120255602952929E+00 0.4721052292993733E-01 0.2544606716854325E-01 0.1252649050433874E-03 0.2718201088283934E-01 0.1070337899619744E-01 0.5932430107520759E-02 0.2022286546491614E-02 0.2280744410484203E-02 0.1821255390779279E-02 0.1827110954508271E-02 0.1145835846045884E-02 0.7409018614936258E-02 0.3506206321787886E-02 0.2936605537399828E-02 0.5807486563469411E-04 0.835073766380025E-02 0.3051367926879323E-01 0.124723860468100E-01 0.1888097615513118E-02 0.1114550340739839E-01 0.2934122479985035E-03 0.8475040323292325E-02 0.8448129125916637E-02 0.390650440000689E-02 0.1288172816170885E-02 0.4061678384132961E-02 0.461284457913460E-02 0.397504675364531E-02 0.3202458801496277E-02 0.3122054705183785E-02 0.356101313159640E-02 0.4089549544351812E-02 0.4275807129230521E-02 0.3820922811005545E-02 0.2957605185187617E-02 0.2049765571505056E-02 0.1461681922970470E-02 0.1441352713158039E-02 0.1766220865224710E-02 0.2095281037553895E-02 0.208776383263079E-02 0.1508117659991370E-02 0.5382733724901279E-03 0.5354528167105244E-03 0.1426658236893363E-02 0.1911478710539871E-02 0.2016540002158914E-02 0.138099860720228E-02 0.1443585887411558E-02 0.9447914169395943E-03 0.4319589830419357E-03 0.3927847175955179E-05 0.2412194886780572E-03 0.240685827146373E-03 0.7046480291195145E-04 0.1587596467175890E-03 0.3353469306323677E-03 0.3708392382939518E-03 0.2764450687920252E-03 0.7417491988837011E-04 0.1929135720851738E-03 0.4887921938923068E-03 0.747419529083001E-03 0.8961403697153036E-03 0.8626840034135244E-03 0.6114014560736347E-03 0.2515295481524045E-03 0.7157633422805176E-04 0.212467028290926E-03 0.730206679892364E-04 0.2560844636566029E-03 0.6368414979394665E-03 0.9313296417832184E-03 0.1030327186778479E-02 0.9390857890745896E-03 0.691900950008499E-03 0.3240125538458982E-03 0.1175328669794085E-03 0.5378801417225132E-03 0.8298578861590800E-03 0.8845935450984832E-03 0.6346506916856676E-03 0.1845349508202698E-03 0.3174473167233405E-03 0.7226143725032053E-03 0.9181710585604574E-03 0.9358566143771174E-03 0.8451768161920059E-03 0.7180997696358271E-03 0.6165376953230310E-03 0.5512749902206737E-03 0.5175065426749476E-03 0.5079788719151296E-03 15 0 0.3457287548786551E+03 0.1212265311478614E+03 0.4250247305247683E+02 0.1460074834431589E+02 0.4946135532324206E+01 0.1677892532212866E+01 0.5797865767173391E+00 0.2044112764951527E+00 0.8064380714615993E+01 0.3405650231507451E+01 0.1639012480857916E+01 0.1831178326631822E-02 0.3641488345422772E-02 0.18799386977131731E-02 0.1247155759234175E-02 0.6814604152357018E-03 0.85266663650082E-03 0.8990512862426525E-05 0.6757830613313143E-04 0.6276442200410371E-03 0.1293332328566987E-02 0.1395329352342434E-02 0.2591857259311992E-03 0.1873540326655853E-03 0.8471284066441376E-03 0.468956635220065E-02 0.170780767433542E-03 0.1094690268460541E-02 0.8514181261527476E-03 0.8141756437986536E-03 0.2079607616379098E-02 0.1640209834401302E-02 0.6164798145545380E-03 0.1223663911659179E-04 0.1932910417697856E-03 0.105225204557967E-03 0.8152761612958276E-04 0.2088248727252912E-03 0.2620626871565682E-03 0.2591550129144270E-03 0.2192364019239640E-03 0.1615237899113657E-03 0.103350085030262E-03 0.6142700077507723E-04 0.52345984087615730E-04 0.856709989692808E-04 0.1431591465155969E-03 0.19968439462161117E-03 0.2302501204504408E-03 0.2190871619907105E-03 0.1867382908659742E-03 0.1627460065950839E-03 0.1766281237338043E-03 0.246688221866661E-03 0.34627052613115E-03 0.4375927926914911E-03 0.4827863995156946E-03 0.455961274847111E-03 0.3790609650998508E-03 0.2860016544780166E-03 0.2106948171258045E-03 0.1779189228452524E-03 0.1759107572965718E-03 0.1837764361601719E-03 0.1806186102267092E-03 0.15200138437220525E-02 0.109362777992634E-03 0.7065052326667631E-04 0.5378570426437640E-04 0.7039587819395593E-04 0.1067858592748831E-03 0.1429541532680697E-03 0.1589209783234997E-03 0.1411938881018102E-03 0.1020723751059857E-03 0.6031328521010422E-04 0.346922451699299E-04 0.3830659973745815E-04 0.613904355598036E-04 0.8845108254601529E-04 0.1039979006984799E-03 0.9656539910734131E-04 0.7085168530842587E-04 0.3560686633003601E-04 0.3741358249601998E-04 0.2810092431571065E-04 0.3805929350954746E-04 0.2066919322966996E-04 0.3359151826461002E-04 0.1275072101250897E-03 0.236896197229232E-03 0.330773882546549E-03 0.3780392197588833E-03 0.3579486957868327E-03 0.29163103301572737E-03 0.2106390534288981E-03 0.1463737889811679E-03 0.1215118091346244E-03 0.1242355351604028E-03 0.1340667319102488E-03 0.1303561727840668E-03 0.990093762433871E-04 0.5272298505516596E-04 0.108926477769225E-04 0.290629592982193E-05 15 3 0.6810266206824870E+02 0.155191711126446E+02 0.3081827868078364E+01 0.3770680860188887E+00 0.7540499579553739E-01 0.6533675623106205E-01 0.2855331151337026E-01 0.4940425323198383E-02 0.5139854119207143E-03 0.1433697715626181E-01 0.9667340544723402E-02 0.7923887241716443E-02 0.2837533406719217E-02 0.2505306285087272E-02 0.2025103722797184E-02 0.3971595728842203E-03 0.163458560114458E-02 0.1706241243232126E-02 0.8618083618636696E-02 0.1505152704902035E-03 0.1197428849183085E-02 0.1619934178024973E-02 0.9103105987893489E-03 0.3175783158998469E-03 0.9373260619314205E-03 0.7531882462115391E-04 0.1606813174854227E-03 0.4519756076193190E-02 0.5505629042523323E-02 0.4838295830421058E-03 0.2815521494087987E-02 0.615558966972969E-02 0.1370271129361722E-03 0.4344199603479079E-02 0.4385537884700728E-02 0.2218394420525877E-02 0.1923762533912779E-03 0.1298261812991315E-02 0.1253911692278438E-02 0.6436213790433215E-03 0.5382511725985372E-04 0.6058287245099182E-04 0.1898186839402191E-03 0.584244669076440E-03 0.8834417376624346E-03 0.9111344589026430E-03 0.9268984304138214E-03 0.4494222047738972E-03 0.1975737155146882E-03 0.6312900982693515E-04 0.2982843618529532E-04 0.5440501699344137E-04 0.9358402940852126E-04 0.1120489526667099E-03 0.1063707261611498E-03 0.810764363797905E-04 0.4065799437682409E-04 0.8943187699820719E-05 0.5592342526381053E-04 0.8699615273198590E-04 0.8889126175604437E-04 0.541483524809174E-04 0.1598028799959387E-05 0.5698861385258617E-04 0.906882205636370E-04 0.8708761903428294E-04 0.5349993398029749E-04 0.303762124503990E-05 0.5104116612502545E-04 0.9649163292395048E-04 0.1258118055027413E-03 0.1328380045316836E-03 0.1114087992924376E-03 0.591463328241244E-04 0.81170225383994796E-05 0.7251066021317495E-04 0.1145874770513766E-03 0.1214508141009057E-03 0.1054121113862132E-03 0.8513771715221990E-04 0.79252610098201434E-04 0.9984313556412377E-04 0.1329293293550773E-03 0.1580706752872425E-03 0.1548991985747004E-03 0.1106612088856928E-03 0.4342674724319835E-04 0.2098608670247450E-04 0.10651258052896208E-04 0.454497476470658E-04 0.3727628191854912E-05 0.4431728309456030E-04 0.7449643069620807E-04 0.699892341995981E-04 0.42472880112463966E-04 0.565524853529891E-04 0.6796464719803253E-05 0.2932529565830249E-05 0.2954030766705549E-04 0.5708625940906765E-04 0.6985871043356742E-04 0.5741238388992085E-04 0.2969247097993046E-04 0.1794169823385230E-05 0.1094129818311153E-04 15 6 0.1798420585398045E+04 0.6703661893733110E+03 0.2446396593905053E+03 0.8667496013863320E+02 0.3017422129399196E+02 0.1043722689491193E+02 0.3708309143166154E+01 0.1318148758972663E+01 0.524349168638751E+00 0.179053846519091E+00 0.5473577355019188E-01 0.6528194297675504E-02 0.7596120503380321E-02 0.12603



0.5437568673616394E-03 0.1453667430841160E-03 0.2151467886185553E-03 0.3521221561682609E-03 0.1461460631555144E-03 0.2589174282815942E-03 0.6537108977221224E-03 0.8291655677377815E-03 0.642262821841038E-03 0.2140549961762214E-03 0.2688210907914501E-03 0.6202985036136382E-03 0.703912409438358E-03 0.5802544910284072E-03 0.3590565662820341E-03 0.1506620197848109E-03 0.4211297149854499E-04 0.2663165644498981E-04 0.7338512033629413E-04 0.1515589239088446E-03 0.2324905307215758E-03 0.2954027080482510E-03 0.3214188483570381E-03 0.291705883750028E-03 0.199499920318289E-03 0.869496887440455E-04 0.894723705639733E-05 0.205507191627576E-04 0.1563709356599670E-03 0.3669604764829000E-03 0.5817240113290961E-03 0.7302571425749093E-03 0.7613231009225359E-03 0.6993582527898736E-03 0.5877389843769419E-03 0.4703369782634534E-03 0.3837791456296419E-03 0.33040659065117E-03 0.3145884290968062E-03 0.3243928391609441E-03 0.3534678720672385E-03 0.3734586599450645E-03 0.3508924965874866E-03 0.25155769734846E-03 0.5875669803453762E-04 0.1712597021249622E-03 0.3635967689610283E-03 0.4435141536841228E-03 0.3649998733919070E-03 0.1941291864611881E-03 0.241775360265685E-04 0.5282571264038564E-04

15 9  
0.4810076023217404E+04 0.1727908021921274E+04 0.6160436375727622E+03 0.2139187871662934E+03 0.7305893406985820E+02 0.2481005885665661E+02 0.8572289455345299E+01 0.3004442671590937E+01 0.1142715757142753E+01 0.530919590373107E+00 0.2306283288191935E+00 0.796514263267776E-01 0.4005607504834074E-01 0.2243769288364206E-01 0.1930796601344653E-01 0.238427541697774E-01 0.1300271604803349E-01 0.9141040034641001E-02 0.1955364594556919E-02 0.6984027350927617E-02 0.1298000883854877E-01 0.1069739037202644E-01 0.1688284706769405E-02 0.7995424270190547E-02 0.9290412693395922E-02 0.5788118690280175E-02 0.1095670629822809E-01 0.8228824762191556E-02 0.4531341119320109E-01 0.2582469042830959E-01 0.2856632224917943E-01 0.3107383159337562E-01 0.1238067893464256E-02 0.3021805564481683E-01 0.3160208200160519E-01 0.1731768633999292E-01 0.3040051706731384E-03 0.9148861442208006E-02 0.1081117222981164E-01 0.6918917616779208E-02 0.3299117925974621E-03 0.8819908110034497E-02 0.166925702430038E-01 0.2214531629568375E-01 0.2336310988876255E-01 0.192831279537716E-01 0.11886526734157E-01 0.391619002607340E-02 0.1895720537366377E-02 0.356794027345883E-02 0.206741723851430E-02 0.90999916321224089E-03 0.3672090283296910E-02 0.4892631917992340E-02 0.4707665429477438E-02 0.3622542908706325E-02 0.213528875008783E-02 0.6949784868621033E-03 0.4575314108577339E-03 0.113169794128773E-02 0.1135784405465448E-02 0.3796883619494968E-03 0.8155421017044329E-03 0.2024996982413708E-02 0.2822561541305793E-02 0.2899916998834347E-02 0.2423704971194671E-02 0.1679972488142918E-02 0.9551026235908343E-03 0.4801566330747860E-03 0.2648698009302172E-03 0.263466970779277E-03 0.4294171522401390E-03 0.7059755229324102E-03 0.9994316895017708E-03 0.1207275812514316E-02 0.1227886712963487E-02 0.100344985910416E-02 0.6483915328525099E-03 0.3197057674965015E-03 0.147614907754532E-03 0.3179745806999408E-03 0.6637554300897451E-03 0.1073556147632020E-02 0.140892927409129E-02 0.1562211476583915E-02 0.1551192816519996E-02 0.1235072815726638E-02 0.1031310720241642E-02 0.8752014372984381E-03 0.870323417269265E-03 0.606927228972428E-03 0.1293845688025715E-02 0.1708487114233495E-02 0.2046220388117006E-02 0.2148593704448791E-02 0.1914985854811790E-02 0.1475381463826721E-02 0.101840287644893E-02 0.7337866684865467E-03 0.7521008237076864E-03 0.9664871455116561E-03 0.1212278825306498E-02 0.1329300215854401E-02

15 12  
-0.4316364194065311E+04 -0.1553620021266735E+04 -0.5541235373656964E+03 -0.1923204857767514E+03 -0.6559802803083221E+02 -0.2225247026272336E+02 -0.7664174053521037E+01 -0.273070226871568E+01 -0.1029817662660662E+01 -0.371230988287088370E+00 -0.1635538287098370E+00 -0.462388456284085E-01 -0.2578722310666137E-02 0.1030516102306910E-01 0.2594006340376609E-01 0.65211620407151829E-01 0.2257142584176819E-01 0.134281997692490E-01 0.5696270488428468E-02 -0.8945404730248185E-02 -0.3776127967938692E-02 0.1521839268157521E-02 0.9456002225192606E-02 0.3148134080683818E-02 0.1288065947431249E-01 0.6763234671250729E-02 0.4236004249420944E-02 0.8021509766065194E-02 0.3263224527263553E-01 0.3376402146244573E-03 0.3798926428131466E-01 0.2228577002173715E-02 0.1547330665590876E-02 0.4813465622285129E-02 0.5789778741869256E-02 0.3579993033010709E-02 0.5026181295102461E-02 0.1601213805866308E-02 0.2681995202963762E-02 0.3111739034486235E-02 0.3263488964625117E-02 0.3439488267729329E-02 0.3594893720823444E-02 0.3590923502392318E-02 0.328552403065147E-02 0.26028151103446580E-02 0.1730509417609216E-02 0.9208132607188849E-03 0.4234867498130734E-03 0.4040076897950939E-03 0.7003878416685927E-03 0.10529694911850598E-02 0.1267179331678303E-02 -0.1121408662064005E-02 -0.7426420657353772E-03 0.3130012848558961E-03 0.14332723031196260E-04 0.2934008796906529E-04 0.7517154594965936E-04 0.1633848119853842E-03 0.7006997811936921E-04 0.3054947339839464E-03 0.8021190997556937E-03 0.1192680540168502E-02 0.1250234014964158E-02 0.8286249225696873E-03 0.1043712202776215E-03 0.6656704795402757E-03 0.1224597150526988E-02 0.1382706713115814E-02 0.1218552406812359E-02 0.8779220720678965E-03 0.5069185228959161E-03 0.2259558874879580E-03 0.5102539154745733E-04 0.2856606456005939E-04 0.2411944646656811E-04 0.4757127759422164E-04 0.1499896251526966E-03 0.2417456889631805E-03 0.2811740398020318E-03 0.2397467983322604E-03 0.1442134538362991E-03 0.3571985030294961E-04 0.4379022371733821E-04 0.6502866244702254E-04 0.5043930958435056E-04 0.3558508878780120E-04 0.5578757982132795E-04 0.1334431164124773E-03 0.2428346281210907E-03 0.3469086752605662E-03 0.4094730113018905E-03 0.4035127593272868E-03 0.3389876656693866E-03 0.2365724022433913E-03 0.1185513730672209E-03 0.4074317293843721E-05 0.1030789254174505E-03 0.201371367068947E-03 0.2848488824203389E-03 0.3463700711510385E-03 0.3875229257161092E-03 0.4121363672023367E-03 0.4207482468381474E-03

16 0  
-0.1704314176539883E+03 -0.5877479501205198E+02 -0.2057584173877694E+02 0.7057075678249021E+01 -0.2377656713595570E+01 -0.7897891856932802E+00 -0.2726521941904139E+00 -0.9125528599543031E-01 -0.3223974476867397E-01 -0.7285280864093123E-02 0.6376211835089407E-02 0.5752777069790257E-02 0.9436180370059333E-03 0.9982612956349612E-04 -0.1224559493856248E-02 -0.1901663400047977E-03 0.8491914369841425E-03 0.8718337269897347E-04 -0.2133163910968960E-03 0.5269380532197943E-03 0.2771196532052045E-03 0.7806671236210150E-03 0.1197356269610594E-02 0.2770051028058163E-03 0.1785291507072628E-03 0.940716246466189E-03 0.609715191255567E-04 0.8289474180109835E-03 0.2557309983780343E-02 0.158752516395437E-03 0.8608477342963994E-03 0.610728519849642E-03 0.6429026671570526E-03 0.1773099281181523E-03 0.9504027513607127E-04 0.2119973857106494E-03 0.2125567002488893E-03 0.1432791264583955E-03 0.5917437414870719E-04 0.1480610783977099E-04 0.6343493245775100E-04 0.2346389540734961E-03 0.4648861048124342E-03 0.6674526676930803E-03 0.755730139339227E-03 0.6709478242458345E-03 0.4652415198105331E-03 0.2181686515263515E-03 0.9204729175982251E-05 0.1000992396218425E-03 0.1189149666518396E-03 0.7399392172935393E-04 0.7989738367797372E-05 0.1015107632177936E-02 0.1855513530470421E-03 0.2402369919320968E-03 0.2456874224848959E-03 0.1909606465546054E-03 0.1007813893752485E-03 0.8785128654487107E-05 0.5137508647976019E-04 0.552077050147563E-04 0.1490407080456668E-04 0.4815927534310149E-04 0.112599008156441E-03 0.1609073492951363E-03 0.191059527917903E-03 0.2048960956954893E-03 0.2042527635360003E-03 0.1912207027533891E-03 0.1688923880954901E-03 0.1406287334382028E-03 0.1097828313680507E-03 0.8023054761822912E-04 0.579645668406980E-04 0.4952466881391615E-04 0.6147018725723152E-04 0.96303170049929536E-04 0.143088768692941E-03 0.175696136782846E-03 0.1846960218855123E-03 0.1559587612133539E-03 0.1037336955003452E-03 0.4865776703909806E-04 0.1137196312054473E-04 0.6417392837514135E-05 0.2399765238011997E-04 0.4821967493737200E-04 0.6316922898884855E-04 0.583418957671961E-04 0.448462203026688E-04 0.392558863592808E-04 0.5799945417305545E-04 0.1104917258019401E-03 0.1777531732650682E-03 0.2336816834377677E-03 0.2520877650733881E-03 0.2165403136549539E-03 0.1499662106277874E-03 0.8515184943456468E-04 0.5486071521568214E-04 0.8081150038545537E-04 0.140674329738787E-03 0.2010914634120800E-03 0.2286600338855353E-03

16 3  
0.4999931003611844E+03 0.1710153162759501E+03 0.5887755010167251E+02 0.198648086400864E+02 0.6591217648519859E+01 0.218754012762713E+01 0.7339159623913574E+00 0.2544661930149523E+00 0.8983021726363205E-01 0.3073738042456908E-01 0.2711265685350028E-01 0.8823637050205946E-02 0.2662825424266657E-02 0.1724847379918515E-02 0.1158831803225624E-02 0.2758743587364165E-02 0.28126717538360120E-02 0.2359343255004642E-02 0.901622157230272E-03 0.9643140749705514E-03 0.2078584493552860E-02 0.2900138426088494E-03 0.3405253847419409E-03 0.3195420856820785E-03 0.4754943059725717E-03 0.8405907976671845E-04 0.5629710927834590E-03 0.1040421243102996E-02 0.113184848091588E-01 0.3081500202272631E-02 0.1866276281931006E-02 0.3174762948729482E-02 0.2551195475324342E-03 0.2193144049599194E-02 0.2365024694154574E-02 0.1294600729984316E-02 0.194378472267805E-04 0.6332495885089801E-03 0.7082994836011686E-03 0.4720574446227047E-02 0.1930143486378946E-03 0.8307200062082631E-04 0.1231638075501404E-03 0.235887029736727E-03 0.3431969439341050E-03 0.3830618771420782E-03 0.3395535051377913E-03 0.2936541765367409E-03 0.206551188755104E-03 0.1158919148482231E-03 0.2479110212239184E-04 0.6728582361705676E-04 0.1609224552512429E-03 0.2527283573362992E-03 0.3233582007081525E-03 0.3495185601600391E-03 0.3079481092347583E-03 0.1880640261521342E-03 0.2992823761925958E-04 0.1136881035238694E-03 0.1899117633249632E-03 0.1634301873173292E-03 0.694409508246388E-04 0.3915174506257573E-04 0.109459988326343E-03 0.1039392473249693E-03 0.461803831333186E-04 0.2499028678344087E-04 0.7081445116103669E-04 0.6394436197523063E-04 0.2257499640533555E-04 0.2389764449944247E-04 0.4621606834863705E-04 0.2423690573561375E-04 0.2582854330749132E-04 0.7868342956392205E-04 0.1088578696751587E-03 0.963074201910418E-04 0.6739746763830212E-04 0.3925986996948170E-04 0.4111010169581097E-04 0.898959910978797E-04 0.1654210830622701E-03 0.2379776009563973E-03 0.2775857950176299E-03 0.2632628057154871E-03 0.152700514815928E-03 0.9139702046611299E-04 0.6830095139919923E-04 0.671525562812733E-04 0.721583625004416E-04 0.6655859393741751E-04 0.32074182023708798E-04 0.9441645310320919E-06 0.3216419659795796E-04 0.3461895754286427E-04 0.5467948917883499E-05 0.686629343791615E-04 0.1266156074895184E-03 0.1509268657470456E-03 0.1232153019669795E-03 0.6482104632603941E-04 0.6849428936853533E-05 0.1946995426398503E-04

16 6  
-0.462933377524169E+03 -0.1350683769636762E+03 -0.4119209279958068E+02 -0.1228024582446915E+02 -0.3549691584736138E+01 -0.1018407935029700E+01 -0.2528277701625775E+00 -0.1050191879780868E+00 -0.3933746260440785E-01 0.24417482588505E-01 0.2178997310997488E-01 0.3256862946562400E-01 0.1048560049131808E-01 0.8614425301502138E-02 0.5799456472729503E-02 0.4472800894745887E-02 0.28527149046009E-02 0.3586035626284456E-02 0.3290873418119844E-02 0.3202950587382958E-02 0.3425097153302303E-02 0.5328816823306326E-02 0.1896717444022605E-02 0.6848836021728033E-02 0.3461757556989298E-02 0.7283972783646675E-02 0.4082582624963749E-02 0.7390750805127411E-03 0.1388754772109024E-01 0.722130042559463E-03 0.2271548839583515E-01 0.815426303863103E-02 0.1040361087035979E-02 0.128531575249418E-01 0.1288741444542222E-01 0.6700801772086429E-02 0.1693817546999377E-03 0.3399192104223570E-02 0.3396122193998972E-02 0.1737144915710420E-02 0.9871391513094352E-05 0.6285976284925443E-03 0.2882229237045619E-03 0.4971928029940953E-03 0.1214243867435627E-02 0.1465334285976394E-02 0.131340296438231E-02 0.935678756499292E-03 0.5069975993031717E-03 0.1698013993595704E-03 0.517010115466999E-04 0.1614913787656436E-03 0.1628998340255650E-02 0.67170433810764E-04 0.827805471822072E-04 0.2366742560352963E-04 0.3447843756161917E-03 0.36915232773782749E-03 0.31759310836892980E-03 0.2092979398028161E-03 0.638703816945703E-04 0.99005084579911

16 9

-0.1503775183142530E+04 -0.5469034604356193E+03 -0.1991282733784926E+03 -0.7061972553437349E+02 -0.2464879447673354E+02 -0.8466433894586174E+01 -0.2919727046218810E+01 -0.10472447889438878E+01 -0.3972545413400326E+00 -0.1975080166494081E-01 -0.4855365761306984E-01 -0.4293698387153455E-01 -0.1811509420699053E-01 -0.1444419265304475E-01 -0.36288889404119207E-02 -0.1171676687532397E-02 -0.2499255372254077E-02 -0.3744173389481631E-02 -0.7417274186429111E-02 -0.8535307598407593E-02 -0.9320707534385575E-02 -0.6446052926734752E-04 -0.9073931374296414E-02 -0.1486490348151945E-01 -0.6395461897215758E-02 -0.8240303467541094E-02 -0.8749792238087894E-02 -0.1519581275487667E-01 -0.2581932814797112E-01 -0.1019993119800812E-01 -0.22818045531640159E-01 -0.1228733406147544E-01 -0.251675328115724E-02 -0.1014979734700946E-02 -0.1332772546267100E-02 -0.124783711180858E-02 -0.303485038922778E-03 -0.2049255372254077E-02 -0.4686148642659439E-02 -0.60069113693411326E-02 -0.5460439829218428E-02 -0.1988182412552438E-02 -0.4861114891955576E-02 -0.1299547482649189E-01 -0.1967107132319385E-01 -0.2212392781610582E-01 -0.1853676927092739E-01 -0.1093881888797229E-01 -0.2326902026122460E-02 -0.4307957646176390E-02 -0.6760973702946510E-02 -0.5923396687959804E-02 -0.3452702843375166E-02 -0.1002644879682554E-02 -0.1416196823690266E-03 -0.1686321598709803E-03 -0.3671514870563798E-03 -0.9146628703714682E-03 -0.1050618267526054E-02 -0.8530741905575638E-03 -0.5229105262662768E-03 -0.259780623853063E-03 -0.2180150780001796E-03 -0.3753708073164689E-03 -0.66675864125248509E-03 -0.1033754240006676E-02 -0.141938863185321E-02 -0.1784265119531493E-02 -0.2090519579587766E-02 -0.2300342988544020E-02 -0.2393509278544887E-02 -0.2415378897268968E-02 -0.2427938045837518E-02 -0.2493632991203131E-02 -0.2655114081746781E-02 -0.28734773994402268E-02 -0.3089009671516759E-02 -0.3242495742373257E-02 -0.3285372071395180E-02 -0.3206792956955643E-02 -0.3005426205763721E-02 -0.2680022108066927E-02 -0.2252230741471414E-02 -0.1832137940382754E-02 -0.15509785770708277E-02 -0.1537913860015540E-02 -0.1858074608107586E-02 -0.2325443821941878E-02 -0.2693352117394506E-02 -0.2716048793438831E-02 -0.2243020726058306E-02 -0.1505113131258098E-02 -0.829596562106774E-03 -0.5464900616298080E-03 -0.8686825337860300E-03 -0.153998972551884E-02 -0.2188986915029017E-02 -0.245100782559226E-02 -0.209483902477290E-02 -0.1401004842593091E-02 -0.7755998935139585E-03 -0.6245947009479205E-03 -0.1205155584416669E-02 -0.2187605998851995E-02 -0.3105534112234893E-02 -0.3509795493813967E-02

16 12

0.2021173908361376E+04 0.7203821688643675E+03 0.2576162156830505E+03 0.9011172311542032E+02 0.3102894934501364E+02 0.1058486042299364E+02 0.3748470419697696E+01 0.1286207142305557E+01 0.4663221135681397E+00 0.6942904700923691E-01 0.7719336874164107E-01 0.3007674385846325E-01 -0.1403862706133907E-01 -0.1474264450030205E-01 -0.4768245220247991E-03 -0.2786204465946440E-01 -0.2137716847638416E-02 -0.7189326898618731E-02 -0.985367475899130E-02 -0.7671425404879528E-02 0.5171503032968872E-02 -0.5702138517932553E-02 0.912530863817620E-02 0.1528689844368284E-01 -0.3184982618392951E-02 0.7700754047633040E-02 0.4680255631722474E-02 0.234590118126145E-02 0.4014564419033206E-01 -0.185794079074670E-01 0.1864669052626233E-02 -0.114337651314660E-01 -0.14337651314660E-01 -0.2431129681716143E-02 0.1265820254787277E-01 0.1356701620221479E-01 0.8044035310119213E-02 0.2084465296034566E-02 0.1943169159770671E-03 0.154763693110663E-02 0.4025274444147722E-02 0.556897885084775E-02 0.472346882208861E-02 0.2221639871773373E-02 0.68028970352926847E-03 -0.2737632466431217E-02 -0.3037969280616837E-02 -0.1977872409534553E-02 -0.2796344579003573E-03 0.1340534055677800E-02 0.2300242249584805E-02 0.2522481492020562E-02 0.2052747592915294E-02 0.935429348106340E-03 -0.726704327459171E-03 -0.2600293542193266E-02 -0.4294543643478232E-02 -0.5418855617489227E-02 -0.5686293493876393E-02 -0.5224947179302442E-02 -0.4266380262502097E-02 -0.3041777161176318E-02 -0.1767365385648756E-02 -0.597465267840124E-03 0.3295098314507472E-03 0.8762532149964586E-03 0.9572538758598481E-03 0.6928179294026201E-03 0.2551444627641175E-03 -0.1810348944906139E-03 -0.4674785044536112E-03 -0.570670245228975E-03 -0.4876251072844784E-03 -0.2158556343848885E-03 0.2182178449889327E-03 0.878123511780696E-03 0.990207321204449E-03 0.9955066388749045E-03 0.601809457558520E-03 0.1980872934112532E-04 -0.4648967249818351E-04 -0.5668574126082432E-04 -0.104721907248551E-03 0.6880084513162382E-03 0.1473986863220880E-02 0.1915919451474027E-02 0.1767537815383281E-02 0.1145978527973594E-02 0.2600529134378984E-03 -0.6798994811279433E-02 -0.1483869140356399E-02 -0.2042373148824821E-02 -0.226540261453341E-02 -0.2060325779552674E-02 -0.1392810245036888E-02 -0.4707479924088293E-03 0.43367017974963548E-03 0.1060351173745335E-02 0.1206536895511048E-02 0.98459738396250005E-03 0.5847161660103954E-03 0.2012211885053967E-03 -0.7948349269031041E-05 -0.6381836980082212E-04 -0.3914881343290884E-04 -0.1305563075314729E-04

17 0

-0.5438296695292888E+02 -0.117100757868989398E+02 -0.554969274229770E+01 -0.1777693966521293E+01 -0.5581312661834659E+00 -0.1805453927433120E+00 -0.5911815091917205E+01 -0.14468830680480953E-01 -0.7392505796750271E-02 -0.151767366513207E-02 -0.2190918588595991E-03 0.1317864420986874E-02 0.1511411449173217E-03 0.2066088746438766E-02 0.4676287888418784E-03 0.5405805909051153E-03 0.2611288065832440E-03 0.8570420795255274E-03 0.7119461465125987E-03 0.2467409184578884E-03 0.4939888019626082E-03 0.8628041501135275E-03 -0.3061513100313107E-03 0.2167717801563672E-03 0.1152281464162908E-03 0.1034873902499012E-03 -0.3042564343856968E-03 0.6922770893085239E-03 -0.4524151500297946E-02 0.4470363885738182E-02 0.192794578020316E-03 0.2133975804823163E-02 -0.32840236138790923E-03 -0.2431129681716143E-02 -0.238980845616839E-02 -0.1220510214576087E-02 0.5412678571764529E-04 0.63383219488123371E-03 0.6053260562700058E-03 0.27854662331343380E-03 -0.3581473163637161E-04 -0.99162503940546E-04 0.3735927485294666E-04 0.2500091150126615E-03 0.4150038211299774E-03 0.439471513190806E-03 0.3543966255031977E-03 0.2217665416523046E-03 0.1036285870034681E-03 0.4830787943735371E-04 0.4903032322649270E-04 0.852159054796429E-04 0.1362840036828981E-03 0.184417152542051E-03 0.2228729398928360E-03 0.2476623029132180E-03 0.2547926542595002E-03 0.2420606719257257E-03 0.2144041159458966E-03 0.178549222806748E-03 0.1412015515867959E-03 0.108025289834603E-03 0.8052484587462924E-04 0.5917316046700170E-04 0.4444187326459528E-04 0.3595190204891234E-04 0.2999909580121002E-04 0.2205868750400700E-04 0.7618778254295244E-05 -0.1610935484497398E-04 -0.4507695615049812E-04 -0.7352944612757858E-04 -0.956993175800219E-04 -0.1069383482827915E-03 -0.1071955669033949E-03 -0.9760184142318992E-04 -0.7934406148157012E-04 -0.590320321528239E-04 -0.3286312863810467E-04 -0.2239035275599863E-04 -0.3318448065569787E-04 -0.6988151508902872E-04 -0.1172284733577497E-03 -0.154938590573256E-03 -0.1626177685026247E-03 -0.1268062569086239E-03 -0.6179233463716235E-04 0.1119394003595755E-04 0.7103822196802929E-04 0.1013599607581788E-03 0.1042625640186954E-03 0.8641364196562001E-04 0.5451148452150075E-04 0.1615269223558717E-04 -0.177316147473581E-04 -0.356622947595643E-04 -0.2601391739519374E-04 0.1664179389034080E-04 0.7379077604399123E-04 0.1208688637468782E-03 0.1331661109206187E-03 0.9523070493815296E-04 0.2915273205234296E-04 -0.3354103012960193E-04 -0.6141086425938522E-04

17 3

-0.3957065342210499E+03 -0.1316978057763399E+03 -0.450072320470370E+02 -0.1514774798701728E+02 -0.4998713382157575E+01 -0.1631427021423860E+01 -0.5381909833652117E+00 -0.1722345217889369E+00 -0.5447005184265663E-01 -0.1477811340458857E-01 -0.1326633385473767E-01 0.3045021385510438E-02 0.5839896652140020E-03 0.2637519613237771E-03 0.4600183205504620E-03 0.2189698945855412E-02 0.8308388301916381E-03 0.1323387358212358E-02 0.51812828024929269E-03 0.4355189873845866E-03 0.6565774216520381E-03 -0.8436402604604387E-03 0.1157561458824841E-02 0.2962062802016828E-03 -0.3162505499421098E-03 0.2899381542473822E-03 0.5766767181341059E-03 0.5432913379403992E-03 0.5555822558045986E-02 -0.4672778873079819E-02 -0.392915732620657E-02 0.3838751053657052E-02 -0.237148213336480E-02 -0.381626734214131E-02 -0.38277533366538289E-02 -0.197578480186909E-02 0.3512593717386325E-04 0.8734076668029667E-03 0.7309708491374800E-03 0.185027818124524E-03 -0.1856945794319609E-03 0.4412850110900590E-04 0.6872780456183974E-03 0.1403487900950739E-02 0.1852260858941246E-02 0.1787353688711496E-02 0.1340872507191844E-02 0.7396603157625026E-03 0.2104990479825722E-03 -0.7222997586969065E-04 -0.1427568536188778E-03 -0.8733261871760392E-04 0.7864969986604714E-05 0.726162243592935E-04 0.1005279572460806E-03 0.1011602721583682E-03 0.8407428531088945E-04 0.5813265422660412E-04 0.2933249780312681E-04 0.29501321579495E-05 -0.157952425429710E-04 -0.2248694245898450E-04 -0.1583169412705879E-04 0.4706908651922956E-05 0.3968893341992769E-04 0.8705068907690402E-04 0.13413108681668386E-04 0.165581177663282E-03 0.1660500934663797E-03 0.126460645205928E-03 0.6269890207002233E-04 -0.3191072340228036E-05 -0.4927416628387618E-04 -0.597239961285379E-04 -0.472784801365716E-04 -0.1266429743440991E-04 0.163436706030172E-04 0.3314598231155810E-04 0.3963679116997156E-04 0.4097688014993912E-04 0.4228478185230714E-04 0.4718582304618713E-04 0.5344205198056450E-04 0.5743046127004107E-04 0.5558680044265990E-04 0.4599838526869195E-04 0.3335704407172427E-04 0.2397892711795318E-04 0.2422846270013343E-04 0.3835648388132793E-04 0.6181659545433949E-04 0.8781969028701011E-04 0.1095141726771271E-03 0.1216146489292587E-03 0.1289871905343137E-03 0.1215991252522891E-03 0.1138379300579970E-03 0.102981877276451E-03 0.8834731665001877E-04 0.6895492478064744E-04 0.4404073270293686E-04 0.1414741521144590E-04 -0.154483613068183E-04 -0.381983918332020E-04 -0.4731688553303708E-04

17 6

0.8958963071700045E+03 0.3000182112594995E+03 0.1016283084547820E+03 0.3368788184350154E+02 0.1095011575735754E+02 0.3555059263919816E+01 0.1140467748605587E+01 0.3821237551288377E+00 0.1151721766393692E+00 0.7955949724186695E-01 0.4333649944601348E-01 0.546581697956153E-02 -0.4572031492394046E-02 -0.6487816123524226E-02 -0.5015933044521859E-02 -0.7144563752277122E-02 -0.885208642762247E-02 -0.4496781446711395E-02 -0.4042175024078332E-02 -0.4264695528817031E-02 -0.7680949001729331E-03 -0.3881977602379072E-02 0.367688937675400E-02 0.2908638183382717E-02 0.6266500985605772E-02 0.1887340665875481E-02 -0.2926697579970328E-02 -0.2093403599440880E-02 -0.4463705031707565E-03 0.1058326211051064E-02 0.1275514459445143E-01 -0.3359243276197743E-02 -0.3238091203312021E-02 0.4795188780474503E-02 0.5065612151627696E-02 0.2711858940942918E-02 0.7934524914071650E-05 -0.1294084996803946E-02 -0.1309826180960243E-02 -0.5911393745943599E-03 0.2798512177213941E-03 0.8524976533385298E-03 0.1094844124539550E-02 0.1080794213367819E-02 0.8841465417042532E-03 0.5809340218136741E-03 0.2564118461199708E-03 -0.163783250357107E-05 -0.1046113918794084E-03 0.1479534297004620E-05 0.2282008328816677E-03 0.45105079141279495E-03 0.6323929224564708E-03 -0.5910921317160043E-03 0.4297925844392106E-03 0.1950616073876487E-03 -0.254975289405420E-04 -0.9914473985941745E-04 0.603626396025441E-04 0.3553492980080866E-03 0.6426485733387038E-03 0.7794578008381205E-03 0.666789321753295E-03 0.3800748761327031E-03 0.38027505970752661E-04 -0.2409618474076393E-04 -0.3677117326712949E-03 -0.3686965175859697E-03 -0.290699240698362E-03 -0.2139608099919218E-03 -0.1574462333746767E-03 -0.12968982714316E-03 -0.1185395132334444E-03 -0.11366649095024E-03 -0.1049459777806052E-03 -0.885435763620214E-04 -0.6218439129267303E-04 -0.2305356465483355E-04 0.252882689522439E-04 0.6325871170709697E-04 0.6485082549691885E-04 0.418574625998429E-05 -0.132521823551261E-03 -0.310360551046816E-03 -0.482172258687701E-03 -0.6009909488017976E-03 -0.6323929224564708E-03 -0.5910921317160043E-03 -0.5039150100941687E-03 -0.3975541854978211E-03 -0.2965674830214067E-03 -0.2165373847902810E-03 -0.1706999159717172E-03 -0.1720011310845551E-03 -0.2238806964922769E-03 -0.2923833456793566E-03 -0.3342237583240669E-03 -0.3061013570705670E-03 -0.1823642501752134E-03 -0.8788475865147334E-05 0.1509593479445604E-03 0.2333666148612373E-03 0.1972019875950493E-03 0.88620771953202



-0.5367062375170701E+03 -0.1876573360907395E+03 -0.6412108689512232E+02 -0.2088513116313598E+02 -0.6513232680498618E+01 -0.2001053553463748E+01 -  
0.5432884693237554E+00 -0.1469260933979513E+00 -0.2369542262390212E-01 -0.8904928057313555E-01 0.5343394319936579E-02 0.2110454838435816E-01 -0.1417383026457664E-  
01 0.3247502620010323E-01 0.2361709044558680E-01 0.2559646370197655E-01 0.2130751595094438E-01 0.6535068577461223E-02 -0.1704021696964819E-02 -  
0.2648864207282609E-02 0.5712560657485710E-02 0.7908981437819262E-02 0.7327533945428732E-02 0.7192747367630536E-02 -0.2339708543661390E-02 0.3196703394325873E-02  
0.7639229656074942E-02 0.1662314182561253E-01 0.2223878069297397E-01 -0.3083819796520432E-01 0.1001441293979449E-01 -0.5616724352001112E-03 -0.6666985694183114E-03  
0.3087069527351827E-02 0.3281353942964305E-02 0.2143654543002999E-02 0.1552427380750787E-02 0.2633631026052491E-02 0.4478352817764528E-02 0.5754970418606148E-02  
0.5209169455332063E-02 0.2116961024084582E-02 -0.2363676644409229E-02 -0.6627848290887237E-02 -0.9086234594836318E-02 -0.8633274728850830E-02 -0.6059906072006946E-02  
-0.2626172487006674E-02 0.4163670895010879E-03 0.2089927657054763E-02 0.2477039895013008E-02 0.1921362041436645E-02 0.7652235071464973E-03 -0.6614712155015995E-03  
-0.2079088347438796E-02 -0.3221237485516608E-02 -0.3822162503017479E-02 -0.3705917505070029E-02 -0.3055165650103832E-02 -0.2141643245334128E-02 -0.1236727351115895E-  
02 -0.5586417282783911E-03 -0.1119079503076516E-03 0.1526834936328740E-03 0.2849042337800438E-03 0.3305403869603525E-03 0.3186694547053070E-03  
0.2743786849266610E-03 0.2243993256870564E-03 0.1947375494502817E-03 0.2019140648521923E-03 0.2586407656295421E-03 0.3767245618199631E-03 0.5517776778532328E-03  
0.7197666611980372E-03 0.8021947954701646E-03 0.7212819392659522E-03 0.4419000381551423E-03 0.9699819093488340E-04 -0.1387784643780278E-03 -0.9123774526281422E-04  
0.3422568151488387E-03 0.9805904307804861E-03 0.1571760354572443E-02 0.1863919060214141E-02 0.1678895602772036E-02 0.1132690351116861E-02 0.4153195367614259E-03  
-0.2824651127850022E-03 -0.7993386960812135E-03 -0.1091455871015485E-02 -0.1143814788622663E-02 -0.9402134563905112E-03 -0.4934596106030321E-03 0.6418667209910736E-  
04 0.5708339478652786E-03 0.8652230750910478E-03 0.8350829754905033E-03 0.5640887294272560E-03 0.1877670429981861E-03  
-0.1525830786421690E-03 -0.3428147800022106E-03 -0.4021214252976769E-03 -0.3896999104045328E-03 -0.3707839369272993E-03
